# Supplementary material for: Pathway analysis for intracellular Porphyromonas gingivalis using a strain ATCC 33277 specific database
Source: PubMed Central journal article supplement (PMC2753363; doi:10.1186/1471-2180-9-185), 2009-09-01
Supplement: 1471-2180-9-185-S1.pdf [file 1471-2180-9-185-S1.pdf]

## Explanatory Notes, pseudo M/A plots, and Data Table ST1, Additional Material for Hendrickson *et al.*

The data table lists our entire set of results calculated from the raw mass spectral data first described in Xia *et al.*, *Proteomics* 2007, **7**:4323-4337. The data were recalculated based on a search of annotated ORFs from the ATCC 33277 annotation of Naito *et al.*, *DNA Res* 2008, **15**:215-225, as described in the main text. The entire dataset is shown in the form of two pseudo M/A plots that precede Table ST1 below. These additional figures look very similar to those originally published using the W83 annotation, but we include them here as additional material for the sake of completeness. The color codes for the plots follow the data table, with the exception that proteins lacking any significant abundance change are coded black. Following our normal practice, a LOWESS (locally weighted scatter plot smoothing) curve fit to the scatter about zero abundance change, based on replicate control analyses, is superimposed over the plot, following the method of Cleveland, *Amer Statistician* 1981, **35**:54-54. For Table ST1, a key to the individual data fields is given below. The variable naming conventions follow those of Xia *et al.* in the original paper. The equations for the *t*-test, *G*-test and further details regarding their application can be found in Xia *et al.*, *Proteomics* 2007, **7**:2904-2919 and in the electronic supplement to Bosch *et al.*, *Proteomics* 2008, **8**:3494-3505. The forms given in Bosch *et al.* were the ones applied here, which differ from the equations originally described for the *P. gingivalis* internalization studies in Xia *et al.*, *Int Jour Mass spectrum* 2007, **259**:105-116.

### Spectra Count Fields

**ORF number.** The ORF numbers from the three most common naming conventions are given. The field as a whole seems to be gravitating to the use of PGN numbers as assigned by Naito *et al.* for ATCC 33277 and related strains, thus we have ordered the entries by PGN number.

***q*-value.** A measure of false discovery rate, similar to a *p*-value, see Storey and Tibshirani, *Proc Natl Acad Sci USA* 2003, **100**:9440-9445. This *q*-value reflects the results of a global *G*-test over all replicates following the method popularized by Sokal and Rohlf referenced in the main text. It is worth noting that the global *G*-test as applied here requires that the data be pre-screened for instances where relative abundance trends for the same annotated ORF go in opposite directions from zero ( $\log_2$  scale) within the same set of replicates. Such data are rare, but in the absence of such a pre-screen the *G*-test will not be sensitive to the direction of change from zero, thus leading to a call of significant change for data that should be properly coded as qualitative detection only, no abundance change. As noted in the main text, the *q* cut-off for all work reported in Table ST1 is 0.01.

**PP(Norm).** Internalized *P. gingivalis* normalized average total spectral counts over all replicates.

**PPC(Norm).** External control *P. gingivalis* normalized average total spectral counts over all replicates.

**log<sub>2</sub>Ratio.** log<sub>2</sub> ratio of PP(Norm)/PPC(norm).

**log<sub>2</sub>sum.** Log<sub>2</sub> of the sum of PP(Norm) and PPC(norm).

**Regulation.** A simple color code is given, indicating the direction of abundance change. Red, increased abundance in the internalized *P. gingivalis* cells; green, decreased relative abundance; yellow, qualitative detection in the absence of statistically significant abundance change.

### **Protein Intensity Fields**

**q-value.** A measure of false discovery rate, similar to a *p*-value, see Storey and Tibshirani as noted above. This *q*-value reflects the results of a paired *t*-test over all replicates, according to the method described in Sokal and Rohlf, as given in the main text.

**PP(Norm).** Internalized *P. gingivalis* normalized average total signal intensity for all MS<sup>1</sup> ions over all replicates.

**PPC(Norm).** External control *P. gingivalis* normalized average total signal intensity for all MS<sup>1</sup> ions over all replicates.

**log<sub>2</sub>Ratio.** Log<sub>2</sub> ratio of PP(Norm)/PPC(norm).

**log<sub>2</sub>sum.** Log<sub>2</sub> of the sum of normalized average total intensities for PP(Norm) and PPC(norm).

**Regulation.** A simple color code indicating the direction of abundance change. Red, increased abundance in the internalized *P. gingivalis* cells; green, decreased relative abundance; yellow, qualitative detection in the absence of statistically significant abundance change.

### **Consensus.**

Readers are urged to consider the spectral count and intensity data separately, but an overall assessment is provided. If all observed trends for a given protein were in the same direction and either spectral counts or intensity were significantly so, then the protein was labeled red or green, if all deviations from zero were greater than 0.1 log<sub>2</sub> units. This rule was *ad hoc* and arbitrary, but yielded results that seemed to fit this dataset reasonably well.

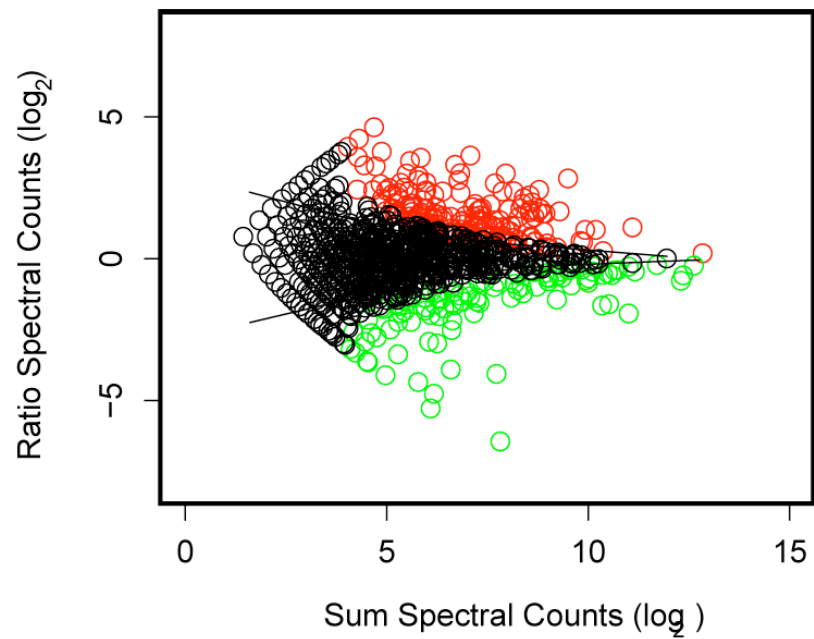

**Pseudo M/A plot for the spectral counting data based on the ATCC 33277 annotation. All protein abundance ratios are internalized/control.**

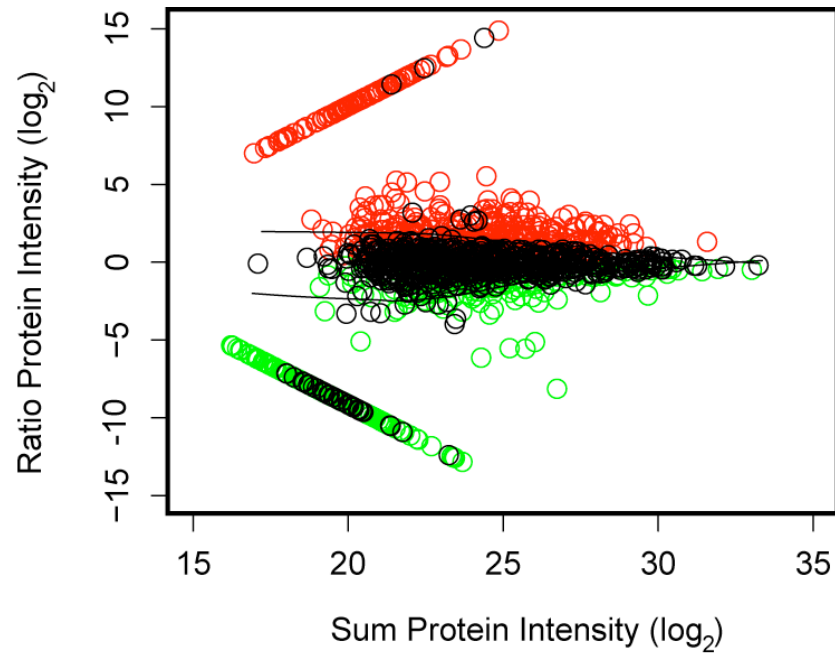

**Pseudo M/A plot for the summed signal intensity data based on the ATCC 33277 annotation. All protein abundance ratios are internalized/control.**

| TIGR    |        | PP PPC / Pg Spectral Count                                      |           |            |                        |                      |            | PP PPC/ Pg Protein Intensity |  |         |           |            |                        | 33277                |           |   |
|---------|--------|-----------------------------------------------------------------|-----------|------------|------------------------|----------------------|------------|------------------------------|--|---------|-----------|------------|------------------------|----------------------|-----------|---|
| PGN     | LANL   | q-value                                                         | PP (Norm) | PPC (Norm) | log <sub>2</sub> Ratio | log <sub>2</sub> Sum | Regulation |                              |  | q-value | PP (Norm) | PPC (Norm) | log <sub>2</sub> Ratio | log <sub>2</sub> Sum | Consensus |   |
| PG0004  |        | 2.98 E-1                                                        | 13.7      | 8          | 0.7751                 | 4.4390               | Y          |                              |  | R       | 1.15 E-6  | 7.93 E+6   | 2.37 E+6               | 1.7408               | 23.2967   | R |
| PGN0004 | PG0004 | <i>transcriptional regulator Sir2 family</i>                    |           |            |                        |                      |            |                              |  |         |           |            |                        |                      |           |   |
| PG0005  |        | 6.63 E-2                                                        | 2.6       | 10         | -1.9619                | 3.6516               | Y          |                              |  | G       | 4.39 E-5  | 1.28 E+6   | 3.3 E+6                | -1.3635              | 22.1298   | G |
| PGN0005 | PG0005 | <i>conserved hypothetical protein</i>                           |           |            |                        |                      |            |                              |  |         |           |            |                        |                      |           |   |
| PG0010  |        | 5.31 E-2                                                        | 9.4       | 2          | 2.2345                 | 3.5125               | Y          |                              |  | R       | 2.58 E-16 | 4.51 E+6   | 8.59 E+5               | 2.3926               | 22.3556   | R |
| PGN0008 | PG0009 | <i>clpC ATP-dependent Clp protease ATP-binding subunit ClpC</i> |           |            |                        |                      |            |                              |  |         |           |            |                        |                      |           |   |
| PG0011  |        | 5.28 E-2                                                        | 31.7      | 16         | 0.9846                 | 5.5747               | Y          |                              |  | Y       | 1.08 E-1  | 1.26 E+7   | 1.05 E+7               | 0.2626               | 24.4651   | Y |
| PGN0009 | PG0010 | <i>glycosyl hydrolase family 3</i>                              |           |            |                        |                      |            |                              |  |         |           |            |                        |                      |           |   |
| PG0012  |        | 9.24 E-9                                                        | 54.8      | 8.5        | 2.6876                 | 5.9833               | R          |                              |  | R       | 0         | 2.73 E+7   | 4.78 E+6               | 2.5157               | 24.9367   | R |
| PGN0010 | PG0011 | <i>L-threonine-O-3-phosphate decarboxylase putative</i>         |           |            |                        |                      |            |                              |  |         |           |            |                        |                      |           |   |
| PG0016  |        | 2.67 E-1                                                        | 9.4       | 4.5        | 1.0646                 | 3.7983               | Y          |                              |  | R       | 6.34 E-7  | 2.22 E+6   | 6.91 E+5               | 1.6845               | 21.4735   | R |
| PGN0012 | PG0013 | <i>sigma-54 dependent DNA-binding response regulator</i>        |           |            |                        |                      |            |                              |  |         |           |            |                        |                      |           |   |
| PG0017  |        | 6.69 E-1                                                        | 1.7       | 1.5        | 0.1901                 | 1.6832               | Y          |                              |  | G       | 0         | 1.85 E+3   | 5.11 E+5               | -8.1093              | 18.9682   | Y |
| PGN0013 | PG0014 | <i>sensor histidine kinase</i>                                  |           |            |                        |                      |            |                              |  |         |           |            |                        |                      |           |   |
| PG0018  |        | 6.69 E-1                                                        | 1.7       | 2          | -0.2249                | 1.8919               | Y          |                              |  | G       | 4.95 E-8  | 1.85 E+3   | 1.54 E+5               | -6.3812              | 17.2521   | G |
| PGN0014 | PG0015 | <i>hypothetical protein PG_0018</i>                             |           |            |                        |                      |            |                              |  |         |           |            |                        |                      |           |   |
| PG0020  |        | 6.97 E-1                                                        | 3.4       | 3.5        | -0.0323                | 2.7913               | Y          |                              |  | Y       | 1.75 E-1  | 1.11 E+6   | 1.29 E+6               | -0.2139              | 21.1945   | Y |
| PGN0015 | PG0017 | <i>transcriptional regulator MarR family</i>                    |           |            |                        |                      |            |                              |  |         |           |            |                        |                      |           |   |
| PG0022  |        | 4.75 E-1                                                        | 6.8       | 4.5        | 0.6052                 | 3.5040               | Y          |                              |  | Y       | 4.5 E-2   | 2.49 E+6   | 1.25 E+6               | 1.0013               | 21.8339   | Y |
| PGN0017 | PG0019 | <i>sulfate permease family protein</i>                          |           |            |                        |                      |            |                              |  |         |           |            |                        |                      |           |   |
| PG0024  |        | 3.76 E-1                                                        | 6.0       | 3          | 0.9975                 | 3.1683               | Y          |                              |  | Y       | 3.33 E-2  | 4.41 E+6   | 2.66 E+6               | 0.7305               | 22.7544   | Y |
| PGN0020 | PG0020 | <i>DNA-binding protein putative</i>                             |           |            |                        |                      |            |                              |  |         |           |            |                        |                      |           |   |
| PG0025  |        | 6.97 E-1                                                        | 3.4       | 3.5        | -0.0323                | 2.7913               | Y          |                              |  | Y       | 7.32 E-2  | 7.76 E+5   | 9.4 E+5                | -0.2774              | 20.7106   | Y |
| PGN0021 | PG0021 | <i>fumarylacetoacetate hydrolase family protein</i>             |           |            |                        |                      |            |                              |  |         |           |            |                        |                      |           |   |
| PG0026  |        | 1.36 E-3                                                        | 17.1      | 45         | -1.3948                | 5.9568               | G          |                              |  | G       | 6.45 E-4  | 1.15 E+7   | 3.55 E+7               | -1.6204              | 25.4865   | G |
| PGN0022 | PG0022 | <i>hypothetical protein PG_0026</i>                             |           |            |                        |                      |            |                              |  |         |           |            |                        |                      |           |   |
| PG0027  |        | 8.17 E-11                                                       | 141.2     | 281.5      | -0.9956                | 8.7234               | G          |                              |  | G       | 1.5 E-8   | 8.52 E+7   | 1.65 E+8               | -0.9567              | 27.9014   | G |
| PGN0023 | PG0023 | <i>hypothetical protein PG_0027</i>                             |           |            |                        |                      |            |                              |  |         |           |            |                        |                      |           |   |
| PG0028  |        | 2.99 E-1                                                        | 6.0       | 11         | -0.8770                | 4.0866               | Y          |                              |  | G       | 1.47 E-4  | 1.45 E+6   | 4.78 E+6               | -1.7233              | 22.5698   | G |
| PGN0024 | PG0024 | <i>ispF 2C-methyl-D-erythritol 24-cyclodiphosphate synthase</i> |           |            |                        |                      |            |                              |  |         |           |            |                        |                      |           |   |
|         |        | 4.4 E-1                                                         | 1.7       | 3.5        | -1.0323                | 2.3816               | Y          |                              |  | Y       | 2.08 E-2  | 1.85 E+3   | 3.1 E+5                | -7.3867              | 18.2490   | Y |
| PGN0025 |        |                                                                 |           |            |                        |                      |            |                              |  |         |           |            |                        |                      |           |   |
| PG0030  |        | 4.14 E-1                                                        | 6.0       | 9.5        | -0.6655                | 3.9532               | Y          |                              |  | Y       | 4.25 E-3  | 3.9 E+6    | 2.15 E+6               | 0.8606               | 22.5266   | Y |
| PGN0026 | PG0026 | <i>cytidine deaminase</i>                                       |           |            |                        |                      |            |                              |  |         |           |            |                        |                      |           |   |

| TIGR    |        | PP PPC / Pg Spectral Count                      |           |            |                        |                      |            | PP PPC/ Pg Protein Intensity |  |         |           |            |                        | 33277                |           |   |
|---------|--------|-------------------------------------------------|-----------|------------|------------------------|----------------------|------------|------------------------------|--|---------|-----------|------------|------------------------|----------------------|-----------|---|
| PGN     | LANL   | q-value                                         | PP (Norm) | PPC (Norm) | log <sub>2</sub> Ratio | log <sub>2</sub> Sum | Regulation |                              |  | q-value | PP (Norm) | PPC (Norm) | log <sub>2</sub> Ratio | log <sub>2</sub> Sum | Consensus |   |
|         |        | 1.94 E-2                                        | 47.9      | 25         | 0.9386                 | 6.1882               | Y          |                              |  | Y       | 5.07 E-3  | 2.22 E+7   | 1.22 E+7               | 0.8604               | 25.0380   | Y |
| PGN0027 |        |                                                 |           |            |                        |                      |            |                              |  |         |           |            |                        |                      |           |   |
| PG0031  |        | 3.86 E-7                                        | 1.7       | 29.5       | -4.1075                | 4.9640               | G          |                              |  | G       | 3.46 E-10 | 1.85 E+3   | 1.35 E+7               | -12.8324             | 23.6863   | G |
| PGN0029 | PG0027 | <i>hypothetical protein PG_0031</i>             |           |            |                        |                      |            |                              |  |         |           |            |                        |                      |           |   |
| PG0032  |        | 3.05 E-1                                        | 6.8       | 12         | -0.8099                | 4.2361               | Y          |                              |  | Y       | 2.08 E-3  | 9.94 E+5   | 2.11 E+6               | -1.0880              | 21.5672   | Y |
| PGN0030 | PG0028 | <i>beta-mannosidase putative</i>                |           |            |                        |                      |            |                              |  |         |           |            |                        |                      |           |   |
| PG0033  |        | 6.69 E-1                                        | 3.4       | 3          | 0.1901                 | 2.6832               | Y          |                              |  | R       | 1.05 E-4  | 1.31 E+6   | 6.85 E+5               | 0.9334               | 20.9273   | R |
| PGN0031 | PG0029 | <i>RmuC domain protein</i>                      |           |            |                        |                      |            |                              |  |         |           |            |                        |                      |           |   |
| PG0034  |        | 6 E-1                                           | 81.3      | 76.5       | 0.0876                 | 7.3018               | Y          |                              |  | Y       | 9.4 E-2   | 1.45 E+8   | 1.17 E+8               | 0.3030               | 27.9661   | Y |
| PGN0033 | PG0030 | <i>trx thioredoxin</i>                          |           |            |                        |                      |            |                              |  |         |           |            |                        |                      |           |   |
| PG0035  |        | 3.56 E-2                                        | 7.7       | 20.5       | -1.4125                | 4.8177               | Y          |                              |  | Y       | 2.99 E-3  | 1.79 E+6   | 4.3 E+6                | -1.2630              | 22.5391   | Y |
| PGN0034 | PG0031 | <i>dnaE DNA polymerase III alpha subunit</i>    |           |            |                        |                      |            |                              |  |         |           |            |                        |                      |           |   |
| PG0037  |        | 2.1 E-7                                         | 52.2      | 10         | 2.3839                 | 5.9587               | R          |                              |  | R       | 0         | 4.45 E+7   | 8.57 E+6               | 2.3769               | 25.6615   | R |
| PGN0035 | PG0032 | <i>rplS ribosomal protein L19</i>               |           |            |                        |                      |            |                              |  |         |           |            |                        |                      |           |   |
| PG0042  |        | 1.38 E-1                                        | 428.7     | 378        | 0.1815                 | 9.6559               | Y          |                              |  | Y       | 1.77 E-2  | 5.22 E+8   | 6.28 E+8               | -0.2653              | 30.0994   | Y |
| PGN0038 | PG0035 | <i>glyA serine hydroxymethyltransferase</i>     |           |            |                        |                      |            |                              |  |         |           |            |                        |                      |           |   |
| PG0043  |        | 5.43 E-1                                        | 53.9      | 48.5       | 0.1525                 | 6.6782               | Y          |                              |  | Y       | 1.61 E-1  | 1.82 E+7   | 1.9 E+7                | -0.0613              | 25.1489   | Y |
| PGN0039 | PG0036 | <i>nahA beta-hexosaminidase</i>                 |           |            |                        |                      |            |                              |  |         |           |            |                        |                      |           |   |
| PG0045  |        | 7.43 E-2                                        | 37.6      | 21.5       | 0.8083                 | 5.8863               | Y          |                              |  | Y       | 9.26 E-2  | 2.09 E+7   | 1.76 E+7               | 0.2515               | 25.1993   | Y |
| PGN0041 | PG0038 | <i>htpG heat shock protein HtpG</i>             |           |            |                        |                      |            |                              |  |         |           |            |                        |                      |           |   |
| PG0046  |        | 6.69 E-1                                        | 3.4       | 3          | 0.1901                 | 2.6832               | Y          |                              |  | Y       | 4.47 E-2  | 6.51 E+5   | 4.6 E+5                | 0.5027               | 20.0837   | Y |
| PGN0042 | PG0040 | <i>cdsA phosphatidate cytidyltransferase</i>    |           |            |                        |                      |            |                              |  |         |           |            |                        |                      |           |   |
| PG0047  |        | 9.98 E-4                                        | 29.1      | 7.5        | 1.9557                 | 5.1935               | R          |                              |  | R       | 0         | 1.04 E+7   | 1.8 E+6                | 2.5308               | 23.5437   | R |
| PGN0043 | PG0041 | <i>cell division protein FtsH putative</i>      |           |            |                        |                      |            |                              |  |         |           |            |                        |                      |           |   |
| PG0048  |        | 2.15 E-1                                        | 8.6       | 3.5        | 1.2897                 | 3.5917               | Y          |                              |  | Y       | 1.43 E-1  | 4.02 E+6   | 2.81 E+6               | 0.5157               | 22.7024   | Y |
| PGN0044 | PG0042 | <i>conserved hypothetical protein TIGR00092</i> |           |            |                        |                      |            |                              |  |         |           |            |                        |                      |           |   |
|         |        | 4.28 E-2                                        | 157.4     | 118        | 0.4160                 | 8.1056               | Y          |                              |  | R       | 1.45 E-13 | 9.76 E+7   | 4.24 E+7               | 1.2013               | 27.0607   | R |
| PGN0053 |        |                                                 |           |            |                        |                      |            |                              |  |         |           |            |                        |                      |           |   |
|         |        | 4.27 E-4                                        | 106.1     | 56.5       | 0.9091                 | 7.3452               | R          |                              |  | R       | 2.58 E-16 | 3.95 E+7   | 1.33 E+7               | 1.5728               | 25.6526   | R |
| PGN0054 |        |                                                 |           |            |                        |                      |            |                              |  |         |           |            |                        |                      |           |   |
|         |        | 5.19 E-1                                        | 11.1      | 8.5        | 0.3881                 | 4.2945               | Y          |                              |  | R       | 2.18 E-8  | 3.48 E+6   | 8.49 E+5               | 2.0347               | 22.0457   | R |
| PGN0057 |        |                                                 |           |            |                        |                      |            |                              |  |         |           |            |                        |                      |           |   |
|         |        | 9.87 E-3                                        | 6.8       | 22.5       | -1.7168                | 4.8751               | G          |                              |  | G       | 2.06 E-6  | 2.34 E+6   | 7 E+6                  | -1.5769              | 23.1551   | G |
| PGN0058 |        |                                                 |           |            |                        |                      |            |                              |  |         |           |            |                        |                      |           |   |

| TIGR    |        | PP PPC / Pg Spectral Count                   |           |            |                        |                      |            | PP PPC/ Pg Protein Intensity |  |         |           |            |                        | 33277                |           |   |
|---------|--------|----------------------------------------------|-----------|------------|------------------------|----------------------|------------|------------------------------|--|---------|-----------|------------|------------------------|----------------------|-----------|---|
| PGN     | LANL   | q-value                                      | PP (Norm) | PPC (Norm) | log <sub>2</sub> Ratio | log <sub>2</sub> Sum | Regulation |                              |  | q-value | PP (Norm) | PPC (Norm) | log <sub>2</sub> Ratio | log <sub>2</sub> Sum | Consensus |   |
|         |        | 1.76 E-1                                     | 50.5      | 35.5       | 0.5080                 | 6.4260               | Y          |                              |  | Y       | 8.83 E-2  | 2.63 E+7   | 2.34 E+7               | 0.1677               | 25.5644   | Y |
| PGN0059 |        |                                              |           |            |                        |                      |            |                              |  |         |           |            |                        |                      |           |   |
|         |        | 2.15 E-1                                     | 4.3       | 1          | 2.0970                 | 2.4001               | Y          |                              |  | R       | 4.17 E-12 | 2.02 E+6   | 1 E+3                  | 10.9783              | 20.9448   | R |
| PGN0062 |        |                                              |           |            |                        |                      |            |                              |  |         |           |            |                        |                      |           |   |
|         |        | 1.13 E-1                                     | 7.7       | 2          | 1.9450                 | 3.2781               | Y          |                              |  | R       | 0         | 3.78 E+6   | 1.09 E+5               | 5.1176               | 21.8905   | R |
| PGN0063 |        |                                              |           |            |                        |                      |            |                              |  |         |           |            |                        |                      |           |   |
|         |        | 9.55 E-3                                     | 10.3      | 1          | 3.3601                 | 3.4941               | Y          |                              |  | R       | 0         | 3.98 E+6   | 1 E+3                  | 11.9577              | 21.9238   | R |
| PGN0064 |        |                                              |           |            |                        |                      |            |                              |  |         |           |            |                        |                      |           |   |
|         |        | 6.61 E-1                                     | 13.7      | 15         | -0.1318                | 4.8425               | Y          |                              |  | Y       | 1.97 E-1  | 3.61 E+6   | 3.57 E+6               | 0.0161               | 22.7774   | Y |
| PGN0065 |        |                                              |           |            |                        |                      |            |                              |  |         |           |            |                        |                      |           |   |
|         |        | 1.36 E-1                                     | 19.7      | 10         | 0.9767                 | 4.8914               | Y          |                              |  | R       | 4.42 E-4  | 6.64 E+6   | 2.85 E+6               | 1.2205               | 23.1769   | R |
| PGN0071 |        |                                              |           |            |                        |                      |            |                              |  |         |           |            |                        |                      |           |   |
| PG1486  |        | 3.82 E-1                                     | 1.7       | 4          | -1.2249                | 2.5138               | Y          |                              |  | G       | 7.61 E-16 | 1.85 E+3   | 2.41 E+5               | -7.0242              | 17.8890   | G |
| PGN0073 | PG1301 | <i>conjugative transposon protein TraA</i>   |           |            |                        |                      |            |                              |  |         |           |            |                        |                      |           |   |
|         |        | 3.21 E-4                                     | 43.6      | 14         | 1.6402                 | 5.8490               | R          |                              |  | R       | 6.52 E-6  | 2.65 E+7   | 1.09 E+7               | 1.2792               | 25.1546   | R |
| PGN0079 |        |                                              |           |            |                        |                      |            |                              |  |         |           |            |                        |                      |           |   |
| PG1447  |        | 2.78 E-1                                     | 40.2      | 29.5       | 0.4470                 | 6.1234               | Y          |                              |  | Y       | 1.26 E-1  | 2.01 E+7   | 2.26 E+7               | -0.1693              | 25.3475   | Y |
| PGN0082 | PG1266 | <i>transcriptional regulator AraC family</i> |           |            |                        |                      |            |                              |  |         |           |            |                        |                      |           |   |
|         |        | 4 E-11                                       | 122.4     | 36.5       | 1.7451                 | 7.3116               | R          |                              |  | R       | 0         | 6.72 E+7   | 1.15 E+7               | 2.5484               | 26.2301   | R |
| PGN0083 |        |                                              |           |            |                        |                      |            |                              |  |         |           |            |                        |                      |           |   |
|         |        | 1.52 E-4                                     | 59.9      | 22.5       | 1.4125                 | 6.3645               | R          |                              |  | R       | 0         | 2.9 E+7    | 5.61 E+6               | 2.3714               | 25.0463   | R |
| PGN0084 |        |                                              |           |            |                        |                      |            |                              |  |         |           |            |                        |                      |           |   |
| PG0816  |        | 6.69 E-1                                     | 1.7       | 1.5        | 0.1901                 | 1.6832               | Y          |                              |  | G       | 0         | 1.85 E+3   | 2.52 E+5               | -7.0866              | 17.9509   | Y |
| PGN0085 | PG0734 | <i>hypothetical protein PG_0816</i>          |           |            |                        |                      |            |                              |  |         |           |            |                        |                      |           |   |
|         |        | 4.55 E-1                                     | 5.1       | 3          | 0.7751                 | 3.0240               | Y          |                              |  | R       | 6.78 E-4  | 7.91 E+6   | 2.19 E+5               | 5.1765               | 22.9549   | R |
| PGN0086 |        |                                              |           |            |                        |                      |            |                              |  |         |           |            |                        |                      |           |   |
|         |        | 2.1 E-2                                      | 28.2      | 52         | -0.8809                | 6.3262               | Y          |                              |  | G       | 1.42 E-4  | 8.26 E+6   | 1.35 E+7               | -0.7116              | 24.3769   | G |
| PGN0087 |        |                                              |           |            |                        |                      |            |                              |  |         |           |            |                        |                      |           |   |
|         |        | 9.44 E-2                                     | 6.0       | 1          | 2.5825                 | 2.8052               | Y          |                              |  | R       | 4.46 E-8  | 3.15 E+6   | 1 E+3                  | 11.6198              | 21.5861   | R |
| PGN0091 |        |                                              |           |            |                        |                      |            |                              |  |         |           |            |                        |                      |           |   |
| PG1113  |        | 4.64 E-4                                     | 15.4      | 1          | 3.9450                 | 4.0358               | R          |                              |  | R       | 1.04 E-6  | 3.04 E+7   | 1 E+3                  | 14.8900              | 24.8558   | R |
| PGN0094 | PG0994 | <i>integrase</i>                             |           |            |                        |                      |            |                              |  |         |           |            |                        |                      |           |   |
| PG2189  |        | 2.74 E-1                                     | 8.6       | 4          | 1.0970                 | 3.6504               | Y          |                              |  | R       | 3.75 E-6  | 3.31 E+6   | 1.25 E+6               | 1.4028               | 22.1203   | R |
| PGN0096 | PG1916 | <i>lysC aspartate kinase</i>                 |           |            |                        |                      |            |                              |  |         |           |            |                        |                      |           |   |

| TIGR    |        | PP PPC / Pg Spectral Count                                              |           |            |                        |                      |            | PP PPC/ Pg Protein Intensity |   |         |           |            |                        | 33277                |           |     |
|---------|--------|-------------------------------------------------------------------------|-----------|------------|------------------------|----------------------|------------|------------------------------|---|---------|-----------|------------|------------------------|----------------------|-----------|-----|
| PGN     | LANL   | q-value                                                                 | PP (Norm) | PPC (Norm) | log <sub>2</sub> Ratio | log <sub>2</sub> Sum | Regulation |                              |   | q-value | PP (Norm) | PPC (Norm) | log <sub>2</sub> Ratio | log <sub>2</sub> Sum | Consensus |     |
| PG2190  |        | 6.02 E-1                                                                | 5.1       | 4          | 0.3601                 | 3.1912               | Y          | ●                            | ● | Y       | 1.87 E-1  | 1.4 E+6    | 1.45 E+6               | -0.0460              | 21.4423   | Y ● |
| PGN0097 | PG1917 | <i>ftsE cell-division ATP-binding protein</i>                           |           |            |                        |                      |            |                              |   |         |           |            |                        |                      |           |     |
|         |        | 2.72 E-1                                                                | 71.0      | 87.5       | -0.3011                | 7.3085               | Y          | ●                            | ● | Y       | 1.54 E-2  | 2.69 E+7   | 3.57 E+7               | -0.4075              | 25.8999   | Y ● |
| PGN0100 |        |                                                                         |           |            |                        |                      |            |                              |   |         |           |            |                        |                      |           |     |
|         |        | 6 E-1                                                                   | 1.7       | 2.5        | -0.5468                | 2.0743               | Y          | ●                            | ● | G       | 1.02 E-6  | 1.85 E+3   | 1.64 E+5               | -6.4683              | 17.3382   | G ● |
| PGN0104 |        |                                                                         |           |            |                        |                      |            |                              |   |         |           |            |                        |                      |           |     |
| PG2182  |        | 2.67 E-1                                                                | 52.2      | 39.5       | 0.4021                 | 6.5188               | Y          | ●                            | ● | Y       | 1.99 E-2  | 4.11 E+7   | 3.1 E+7                | 0.4063               | 26.1036   | Y ● |
| PGN0114 | PG1911 | <i>nqrA NADH:ubiquinone oxidoreductase Na translocating A subunit</i>   |           |            |                        |                      |            |                              |   |         |           |            |                        |                      |           |     |
| PG2181  |        | 4.75 E-1                                                                | 17.1      | 21.5       | -0.3292                | 5.2710               | Y          | ●                            | ● | Y       | 1.91 E-2  | 3.1 E+6    | 8.65 E+6               | -1.4800              | 23.4858   | Y ● |
| PGN0115 | PG1910 | <i>nqrB NADH:ubiquinone oxidoreductase Na translocating B subunit</i>   |           |            |                        |                      |            |                              |   |         |           |            |                        |                      |           |     |
| PG2180  |        | 4.97 E-1                                                                | 15.4      | 12         | 0.3601                 | 4.7762               | Y          | ●                            | ● | Y       | 1.47 E-3  | 1.26 E+7   | 8.66 E+6               | 0.5397               | 24.3410   | Y ● |
| PGN0116 | PG1909 | <i>nqrC NADH:ubiquinone oxidoreductase Na translocating C subunit</i>   |           |            |                        |                      |            |                              |   |         |           |            |                        |                      |           |     |
| PG2178  |        | 6.69 E-1                                                                | 1.7       | 1.5        | 0.1901                 | 1.6832               | Y          | ●                            | ● | G       | 0         | 1.85 E+3   | 1.3 E+5                | -6.1398              | 17.0138   | Y ● |
| PGN0118 | PG1907 | <i>nqrE NADH:ubiquinone oxidoreductase Na translocating E subunit</i>   |           |            |                        |                      |            |                              |   |         |           |            |                        |                      |           |     |
| PG2177  |        | 4.98 E-2                                                                | 79.6      | 53         | 0.5863                 | 7.0507               | Y          | ●                            | ● | Y       | 4.49 E-2  | 3.99 E+7   | 3.27 E+7               | 0.2865               | 26.1130   | Y ● |
| PGN0119 | PG1906 | <i>nqrF NADH:ubiquinone oxidoreductase Na translocating F subunit</i>   |           |            |                        |                      |            |                              |   |         |           |            |                        |                      |           |     |
| PG2175  |        | 1.94 E-2                                                                | 47.9      | 25         | 0.9386                 | 6.1882               | Y          | ●                            | ● | R       | 2.79 E-8  | 5.54 E+7   | 1.15 E+7               | 2.2698               | 25.9949   | R ● |
| PGN0120 | PG1903 | <i>conserved hypothetical protein</i>                                   |           |            |                        |                      |            |                              |   |         |           |            |                        |                      |           |     |
| PG2174  |        | 3.17 E-2                                                                | 211.3     | 163        | 0.3747                 | 8.5482               | Y          | ●                            | ● | Y       | 1.91 E-1  | 9.48 E+7   | 9.38 E+7               | 0.0146               | 27.4909   | Y ● |
| PGN0121 | PG1902 | <i>hypothetical protein PG_2174</i>                                     |           |            |                        |                      |            |                              |   |         |           |            |                        |                      |           |     |
| PG2173  |        | 3.28 E-1                                                                | 71.9      | 86         | -0.2589                | 7.3026               | Y          | ●                            | ● | Y       | 9.87 E-3  | 5.13 E+7   | 7.82 E+7               | -0.6096              | 26.9478   | Y ● |
| PGN0122 | PG1901 | <i>omp28 outer membrane lipoprotein Omp28</i>                           |           |            |                        |                      |            |                              |   |         |           |            |                        |                      |           |     |
| PG2172  |        | 3.05 E-2                                                                | 48.8      | 27         | 0.8531                 | 6.2436               | Y          | ●                            | ● | Y       | 1.22 E-1  | 4.27 E+7   | 3.46 E+7               | 0.3026               | 26.2049   | Y ● |
| PGN0123 | PG1899 | <i>hypothetical protein PG_2172</i>                                     |           |            |                        |                      |            |                              |   |         |           |            |                        |                      |           |     |
| PG2171  |        | 6.64 E-1                                                                | 80.4      | 77.5       | 0.0536                 | 7.3032               | Y          | ●                            | ● | R       | 2.57 E-6  | 1.51 E+7   | 8.31 E+6               | 0.8632               | 24.4816   | R ● |
| PGN0125 | PG1898 | <i>D-isomer specific 2-hydroxyacid dehydrogenase family protein</i>     |           |            |                        |                      |            |                              |   |         |           |            |                        |                      |           |     |
| PG2170  |        | 4.75 E-1                                                                | 3.4       | 5.5        | -0.6843                | 3.1575               | Y          | ●                            | ● | Y       | 6.91 E-3  | 8.21 E+5   | 3.17 E+6               | -1.9506              | 21.9288   | Y ● |
| PGN0126 | PG1897 | <i>sugar transporter</i>                                                |           |            |                        |                      |            |                              |   |         |           |            |                        |                      |           |     |
| PG2167  |        | 1.13 E-4                                                                | 248.1     | 162        | 0.6152                 | 8.6800               | R          | ●                            | ● | Y       | 7.12 E-2  | 3.82 E+8   | 3.38 E+8               | 0.1762               | 29.4243   | R ● |
| PGN0128 | PG1893 | <i>immunoreactive 53 kDa antigen PG123</i>                              |           |            |                        |                      |            |                              |   |         |           |            |                        |                      |           |     |
| PG2168  |        | 0                                                                       | 6.0       | 90         | -3.9094                | 6.5848               | G          | ●                            | ● | G       | 2.01 E-5  | 1.15 E+6   | 5.4 E+7                | -5.5588              | 25.7179   | G ● |
| PGN0129 | PG1894 | <i>hypothetical protein PG_2168</i>                                     |           |            |                        |                      |            |                              |   |         |           |            |                        |                      |           |     |
| PG2080  |        | 4.4 E-1                                                                 | 5.1       | 8          | -0.6399                | 3.7152               | Y          | ●                            | ● | Y       | 1.99 E-1  | 1.44 E+6   | 1.45 E+6               | -0.0097              | 21.4671   | Y ● |
| PGN0133 | PG1818 | <i>bioA adenosylmethionine--8-amino-7-oxononanoate aminotransferase</i> |           |            |                        |                      |            |                              |   |         |           |            |                        |                      |           |     |



| TIGR    |        | PP PPC / Pg Spectral Count                             |           |            |                        |                      |            | PP PPC/ Pg Protein Intensity |  |         |           |            |                        | 33277                |           |   |
|---------|--------|--------------------------------------------------------|-----------|------------|------------------------|----------------------|------------|------------------------------|--|---------|-----------|------------|------------------------|----------------------|-----------|---|
| PGN     | LANL   | q-value                                                | PP (Norm) | PPC (Norm) | log <sub>2</sub> Ratio | log <sub>2</sub> Sum | Regulation |                              |  | q-value | PP (Norm) | PPC (Norm) | log <sub>2</sub> Ratio | log <sub>2</sub> Sum | Consensus |   |
| PG2081  |        | 4.4 E-1                                                | 1.7       | 3.5        | -1.0323                | 2.3816               | Y          |                              |  | Y       | 2.07 E-2  | 1.85 E+3   | 6.7 E+5                | -8.5007              | 19.3584   | Y |
| PGN0134 | PG1819 | <i>bioB biotin synthetase</i>                          |           |            |                        |                      |            |                              |  |         |           |            |                        |                      |           |   |
| PG2082  |        | 1.72 E-1                                               | 30.8      | 45         | -0.5468                | 6.2442               | Y          |                              |  | Y       | 2.61 E-3  | 1.85 E+7   | 4.02 E+7               | -1.1149              | 25.8075   | Y |
| PGN0135 | PG1820 | <i>POT family protein</i>                              |           |            |                        |                      |            |                              |  |         |           |            |                        |                      |           |   |
| PG2083  |        | 5.82 E-3                                               | 35.1      | 13.5       | 1.3778                 | 5.6023               | R          |                              |  | Y       | 7.59 E-3  | 1.28 E+7   | 7.84 E+6               | 0.7012               | 24.2956   | R |
| PGN0136 | PG1821 | <i>hypothetical protein PG_2083</i>                    |           |            |                        |                      |            |                              |  |         |           |            |                        |                      |           |   |
| PG2085  |        | 2.53 E-1                                               | 33.4      | 45.5       | -0.4473                | 6.3014               | Y          |                              |  | Y       | 1.17 E-3  | 1.42 E+7   | 2.37 E+7               | -0.7429              | 25.1762   | Y |
| PGN0137 | PG1822 | <i>trpS tryptophanyl-tRNA synthetase</i>               |           |            |                        |                      |            |                              |  |         |           |            |                        |                      |           |   |
| PG2086  |        | 5.38 E-1                                               | 71.0      | 64.5       | 0.1389                 | 7.0824               | Y          |                              |  | Y       | 1.23 E-2  | 2.69 E+7   | 5.82 E+7               | -1.1160              | 26.3425   | Y |
| PGN0138 | PG1823 | <i>hypothetical protein PG_2086</i>                    |           |            |                        |                      |            |                              |  |         |           |            |                        |                      |           |   |
| PG2088  |        | 6.54 E-1                                               | 8.6       | 7.5        | 0.1901                 | 4.0051               | Y          |                              |  | Y       | 5.06 E-2  | 5.46 E+6   | 3.57 E+6               | 0.6132               | 23.1074   | Y |
| PGN0140 | PG1826 | <i>msrA peptide methionine sulfoxide reductase</i>     |           |            |                        |                      |            |                              |  |         |           |            |                        |                      |           |   |
| PG2089  |        | 6 E-1                                                  | 6.0       | 7.5        | -0.3244                | 3.7538               | Y          |                              |  | Y       | 3.48 E-3  | 1.04 E+6   | 2.69 E+6               | -1.3625              | 21.8309   | Y |
| PGN0141 | PG1827 | <i>hypothetical protein PG_2089</i>                    |           |            |                        |                      |            |                              |  |         |           |            |                        |                      |           |   |
| PG2090  |        | 3.82 E-1                                               | 1.7       | 4          | -1.2249                | 2.5138               | Y          |                              |  | Y       | 6.8 E-3   | 1.85 E+3   | 1.19 E+6               | -9.3244              | 20.1803   | Y |
| PGN0142 | PG1828 | <i>cation efflux family protein</i>                    |           |            |                        |                      |            |                              |  |         |           |            |                        |                      |           |   |
| PG2091  |        | 5.77 E-2                                               | 3.4       | 12         | -1.8099                | 3.9470               | Y          |                              |  | G       | 7.86 E-6  | 2.93 E+5   | 2.67 E+6               | -3.1868              | 21.4974   | G |
| PGN0143 | PG1829 | <i>folB dihydroneopterin aldolase</i>                  |           |            |                        |                      |            |                              |  |         |           |            |                        |                      |           |   |
| PG2092  |        | 2.72 E-2                                               | 12.0      | 28         | -1.2249                | 5.3212               | Y          |                              |  | Y       | 1.97 E-2  | 3.81 E+6   | 5.73 E+6               | -0.5893              | 23.1844   | Y |
| PGN0144 | PG1830 | <i>hypothetical protein PG_2092</i>                    |           |            |                        |                      |            |                              |  |         |           |            |                        |                      |           |   |
| PG2094  |        | 4.8 E-1                                                | 4.3       | 2.5        | 0.7751                 | 2.7609               | Y          |                              |  | R       | 0         | 8.39 E+5   | 2.43 E+5               | 1.7854               | 20.0460   | R |
| PGN0145 | PG1831 | <i>conserved domain protein</i>                        |           |            |                        |                      |            |                              |  |         |           |            |                        |                      |           |   |
| PG2095  |        | 6 E-1                                                  | 1.7       | 2.5        | -0.5468                | 2.0743               | Y          |                              |  | G       | 8.24 E-4  | 1.85 E+3   | 5.76 E+5               | -8.2822              | 19.1406   | G |
| PGN0147 | PG1832 | <i>lipoprotein putative</i>                            |           |            |                        |                      |            |                              |  |         |           |            |                        |                      |           |   |
| PG2096  |        | 3.05 E-1                                               | 3.4       | 1          | 1.7751                 | 2.1449               | Y          |                              |  | R       | 1.5 E-15  | 3.77 E+5   | 1 E+3                  | 8.5586               | 18.5282   | R |
| PGN0148 | PG1833 | <i>conserved domain protein</i>                        |           |            |                        |                      |            |                              |  |         |           |            |                        |                      |           |   |
| PG2097  |        | 1.84 E-1                                               | 113.8     | 91         | 0.3226                 | 7.6781               | Y          |                              |  | Y       | 9.6 E-2   | 7.05 E+7   | 6.24 E+7               | 0.1756               | 26.9859   | Y |
| PGN0149 | PG1834 | <i>prsA ribose-phosphate pyrophosphokinase</i>         |           |            |                        |                      |            |                              |  |         |           |            |                        |                      |           |   |
| PG2099  |        | 5.17 E-1                                               | 1.7       | 3          | -0.8099                | 2.2361               | Y          |                              |  | Y       | 1.44 E-1  | 1.03 E+6   | 1.21 E+6               | -0.2274              | 21.0942   | Y |
| PGN0150 | PG1835 | <i>ATP-dependent RNA helicase DEAD/DEAH box family</i> |           |            |                        |                      |            |                              |  |         |           |            |                        |                      |           |   |
| PG2101  |        | 9.37 E-6                                               | 36.8      | 6.5        | 2.5009                 | 5.4361               | R          |                              |  | R       | 0         | 3.48 E+7   | 6.63 E+6               | 2.3920               | 25.3042   | R |
| PGN0151 | PG1837 | <i>hypothetical protein PG_2101</i>                    |           |            |                        |                      |            |                              |  |         |           |            |                        |                      |           |   |
| PG2102  |        | 6.61 E-8                                               | 690.5     | 923.5      | -0.4194                | 10.6564              | G          |                              |  | Y       | 1.46 E-3  | 4.96 E+8   | 6.88 E+8               | -0.4732              | 30.1411   | G |
| PGN0152 | PG1838 | <i>immunoreactive 61 kDa antigen PG91</i>              |           |            |                        |                      |            |                              |  |         |           |            |                        |                      |           |   |

| TIGR    |        | PP PPC / Pg Spectral Count                                                |           |            |                        |                      |                                                                                                                                                                                 | PP PPC/ Pg Protein Intensity |           |            |                        |                      |                                                                                         | 33277 |
|---------|--------|---------------------------------------------------------------------------|-----------|------------|------------------------|----------------------|---------------------------------------------------------------------------------------------------------------------------------------------------------------------------------|------------------------------|-----------|------------|------------------------|----------------------|-----------------------------------------------------------------------------------------|-------|
| PGN     | LANL   | q-value                                                                   | PP (Norm) | PPC (Norm) | log <sub>2</sub> Ratio | log <sub>2</sub> Sum | Regulation                                                                                                                                                                      | q-value                      | PP (Norm) | PPC (Norm) | log <sub>2</sub> Ratio | log <sub>2</sub> Sum | Consensus                                                                               |       |
| PG2105  |        | 1.51 E-1                                                                  | 12.0      | 5          | 1.2605                 | 4.0857               | Y   R     | 2.03 E-9                     | 8.61 E+6  | 1.9 E+6    | 2.1782                 | 23.3250              | R    |       |
| PGN0154 | PG1839 | <i>lipoprotein putative</i>                                               |           |            |                        |                      |                                                                                                                                                                                 |                              |           |            |                        |                      |                                                                                         |       |
| PG2106  |        | 4.62 E-1                                                                  | 292.6     | 275        | 0.0897                 | 9.1488               | Y   R     | 8 E-5                        | 9.57 E+7  | 5.91 E+7   | 0.6956                 | 27.2064              | R    |       |
| PGN0156 | PG1840 | <i>hypothetical protein PG_2106</i>                                       |           |            |                        |                      |                                                                                                                                                                                 |                              |           |            |                        |                      |                                                                                         |       |
| PG2107  |        | 6.05 E-2                                                                  | 79.6      | 54         | 0.5594                 | 7.0615               | Y   Y     | 2.19 E-2                     | 2.51 E+7  | 2 E+7      | 0.3270                 | 25.4290              | Y    |       |
| PGN0157 | PG1841 | <i>thiH thiH protein</i>                                                  |           |            |                        |                      |                                                                                                                                                                                 |                              |           |            |                        |                      |                                                                                         |       |
| PG2108  |        | 7.02 E-1                                                                  | 43.6      | 43.5       | 0.0046                 | 6.4452               | Y   Y     | 1.08 E-2                     | 2.64 E+7  | 4.66 E+7   | -0.8185                | 26.1216              | Y    |       |
| PGN0158 | PG1843 | <i>thiG thiG protein</i>                                                  |           |            |                        |                      |                                                                                                                                                                                 |                              |           |            |                        |                      |                                                                                         |       |
| PG2109  |        | 6.69 E-1                                                                  | 17.1      | 16         | 0.0970                 | 5.0493               | Y   Y     | 5.96 E-2                     | 7.05 E+6  | 5.41 E+6   | 0.3839                 | 23.5708              | Y    |       |
| PGN0159 | PG1844 | <i>hydroxymethylpyrimidine kinase/thiamin-phosphate pyrophosphorylase</i> |           |            |                        |                      |                                                                                                                                                                                 |                              |           |            |                        |                      |                                                                                         |       |
| PG2110  |        | 1.61 E-1                                                                  | 83.0      | 106        | -0.3529                | 7.5622               | Y   G     | 2.88 E-9                     | 3.26 E+7  | 7.66 E+7   | -1.2344                | 26.7027              | G    |       |
| PGN0160 | PG1845 | <i>thiC thiamine biosynthesis protein ThiC</i>                            |           |            |                        |                      |                                                                                                                                                                                 |                              |           |            |                        |                      |                                                                                         |       |
| PG2112  |        | 3.5 E-1                                                                   | 4.3       | 8          | -0.9030                | 3.6180               | Y   G     | 2.81 E-4                     | 3.06 E+5  | 1.46 E+6   | -2.2548                | 20.7512              | G    |       |
| PGN0162 | PG1848 | <i>hypothetical protein PG_2112</i>                                       |           |            |                        |                      |                                                                                                                                                                                 |                              |           |            |                        |                      |                                                                                         |       |
| PG2117  |        | 4.89 E-2                                                                  | 36.8      | 19.5       | 0.9160                 | 5.8149               | Y   R     | 1.82 E-4                     | 3.5 E+7   | 1.91 E+7   | 0.8746                 | 25.6870              | R    |       |
| PGN0167 | PG1850 | <i>rpsP ribosomal protein S16</i>                                         |           |            |                        |                      |                                                                                                                                                                                 |                              |           |            |                        |                      |                                                                                         |       |
|         |        | 7.2 E-3                                                                   | 36.8      | 15         | 1.2945                 | 5.6947               | R   R     | 2.51 E-11                    | 2.27 E+7  | 3.61 E+6   | 2.6548                 | 24.6492              | R    |       |
| PGN0168 |        |                                                                           |           |            |                        |                      |                                                                                                                                                                                 |                              |           |            |                        |                      |                                                                                         |       |
| PG2120  |        | 3.05 E-1                                                                  | 2.6       | 6          | -1.2249                | 3.0988               | Y   Y     | 1.28 E-2                     | 1.71 E+5  | 1.56 E+6   | -3.1873                | 20.7192              | Y    |       |
| PGN0169 | PG1853 | <i>metallo-beta-lactamase superfamily protein</i>                         |           |            |                        |                      |                                                                                                                                                                                 |                              |           |            |                        |                      |                                                                                         |       |
| PG2121  |        | 1.57 E-2                                                                  | 18.0      | 5          | 1.8455                 | 4.5216               | Y   R     | 3.67 E-15                    | 8.3 E+6   | 2.8 E+6    | 1.5689                 | 23.4037              | R    |       |
| PGN0170 | PG1854 | <i>ansA L-asparaginase</i>                                                |           |            |                        |                      |                                                                                                                                                                                 |                              |           |            |                        |                      |                                                                                         |       |
| PG2124  |        | 9.97 E-8                                                                  | 735.0     | 971.5      | -0.4025                | 10.7368              | G   Y   | 1.01 E-2                     | 4.1 E+8   | 5.19 E+8   | -0.3387                | 29.7905              | G   |       |
| PGN0173 | PG1857 | <i>gapA glyceraldehyde 3-phosphate dehydrogenase type I</i>               |           |            |                        |                      |                                                                                                                                                                                 |                              |           |            |                        |                      |                                                                                         |       |
| PG2126  |        | 2.52 E-1                                                                  | 5.1       | 10.5       | -1.0323                | 3.9666               | Y   Y | 1.9 E-1                      | 1.85 E+6  | 1.81 E+6   | 0.0254                 | 21.8042              | Y  |       |
| PGN0175 | PG1859 | <i>conserved hypothetical protein TIGR00044</i>                           |           |            |                        |                      |                                                                                                                                                                                 |                              |           |            |                        |                      |                                                                                         |       |
| PG2127  |        | 1.84 E-1                                                                  | 28.2      | 41.5       | -0.5555                | 6.1238               | Y   Y | 1.07 E-1                     | 2.13 E+7  | 2.67 E+7   | -0.3246                | 25.5169              | Y  |       |
| PGN0176 | PG1860 | <i>hypothetical protein PG_2127</i>                                       |           |            |                        |                      |                                                                                                                                                                                 |                              |           |            |                        |                      |                                                                                         |       |
| PG2130  |        | 0                                                                         | 2.6       | 223.5      | -6.4441                | 7.8206               | G   G | 3.16 E-7                     | 3.94 E+5  | 1.11 E+8   | -8.1375                | 26.7318              | G  |       |
| PGN0178 | PG1863 | <i>hypothetical protein PG_2130</i>                                       |           |            |                        |                      |                                                                                                                                                                                 |                              |           |            |                        |                      |                                                                                         |       |
| PG2131  |        | 3.11 E-1                                                                  | 405.6     | 373        | 0.1208                 | 9.6047               | Y   Y | 5.87 E-2                     | 4.57 E+8  | 4.04 E+8   | 0.1790                 | 29.6809              | Y  |       |
| PGN0179 | PG1864 | <i>60 kDa protein</i>                                                     |           |            |                        |                      |                                                                                                                                                                                 |                              |           |            |                        |                      |                                                                                         |       |
| PG2132  |        | 0                                                                         | 426.1     | 1623       | -1.9293                | 11.0008              | G   G | 0                            | 1.59 E+8  | 6.94 E+8   | -2.1299                | 29.6669              | G  |       |
| PGN0180 | PG1865 | <i>fimA fimbrilin</i>                                                     |           |            |                        |                      |                                                                                                                                                                                 |                              |           |            |                        |                      |                                                                                         |       |

| TIGR                 |        | PP PPC / Pg Spectral Count                                |           |            |                        |                      |            | PP PPC/ Pg Protein Intensity |  |         |           |            |                        | 33277                |           |   |
|----------------------|--------|-----------------------------------------------------------|-----------|------------|------------------------|----------------------|------------|------------------------------|--|---------|-----------|------------|------------------------|----------------------|-----------|---|
| PGN                  | LANL   | q-value                                                   | PP (Norm) | PPC (Norm) | log <sub>2</sub> Ratio | log <sub>2</sub> Sum | Regulation |                              |  | q-value | PP (Norm) | PPC (Norm) | log <sub>2</sub> Ratio | log <sub>2</sub> Sum | Consensus |   |
| P137931<br>EMA_P0821 |        | 0                                                         | 426.1     | 1623       | -1.9293                | 11.0008              | G          |                              |  | G       | 0         | 1.59 E+8   | 6.94 E+8               | -2.1299              | 29.6669   | G |
| PGN0180              |        | <i>major fimbrillin A, Porphyromonas gingivalis 33277</i> |           |            |                        |                      |            |                              |  |         |           |            |                        |                      |           |   |
| PG2134               |        | 3.03 E-3                                                  | 9.4       | 30         | -1.6724                | 5.3006               | G          |                              |  | G       | 4.03 E-10 | 2.83 E+6   | 1.72 E+7               | -2.6066              | 24.2566   | G |
| PGN0183              | PG1867 | <i>lipoprotein putative</i>                               |           |            |                        |                      |            |                              |  |         |           |            |                        |                      |           |   |
| PG2135               |        | 4.08 E-10                                                 | 7.7       | 58.5       | -2.9253                | 6.0488               | G          |                              |  | G       | 2.96 E-11 | 2.94 E+6   | 2.42 E+7               | -3.0426              | 24.6930   | G |
| PGN0184              | PG1868 | <i>lipoprotein putative</i>                               |           |            |                        |                      |            |                              |  |         |           |            |                        |                      |           |   |
| PG2136               |        | 1.74 E-6                                                  | 19.7      | 66.5       | -1.7566                | 6.4293               | G          |                              |  | G       | 3.72 E-14 | 8.97 E+6   | 4.11 E+7               | -2.1972              | 25.5778   | G |
| PGN0185              | PG1869 | <i>hypothetical protein PG_2136</i>                       |           |            |                        |                      |            |                              |  |         |           |            |                        |                      |           |   |
| PG2140               |        | 9.44 E-2                                                  | 6.0       | 1          | 2.5825                 | 2.8052               | Y          |                              |  | R       | 0         | 1.38 E+6   | 1 E+3                  | 10.4275              | 20.3943   | R |
| PGN0188              |        | <i>rpmF ribosomal protein L32</i>                         |           |            |                        |                      |            |                              |  |         |           |            |                        |                      |           |   |
| PG2141               |        | 1.97 E-1                                                  | 73.6      | 56         | 0.3940                 | 7.0178               | Y          |                              |  | Y       | 3.91 E-2  | 4.4 E+7    | 3.4 E+7                | 0.3690               | 26.2168   | Y |
| PGN0189              | PG1872 | <i>fabH 3-oxoacyl-(acyl-carrier-protein) synthase III</i> |           |            |                        |                      |            |                              |  |         |           |            |                        |                      |           |   |
| PG2142               |        | 3.85 E-1                                                  | 5.1       | 2.5        | 1.0381                 | 2.9324               | Y          |                              |  | Y       | 2.94 E-2  | 3.48 E+6   | 1.76 E+6               | 0.9840               | 22.3192   | Y |
| PGN0190              | PG1873 | <i>era GTP-binding protein Era</i>                        |           |            |                        |                      |            |                              |  |         |           |            |                        |                      |           |   |
| PG2143               |        | 3.08 E-4                                                  | 26.5      | 5          | 2.4074                 | 4.9784               | R          |                              |  | Y       | 6.55 E-3  | 4.83 E+6   | 2.41 E+6               | 1.0059               | 22.7871   | R |
| PGN0191              | PG1874 | <i>GTP-binding protein Era/ThdF family</i>                |           |            |                        |                      |            |                              |  |         |           |            |                        |                      |           |   |
| PG2144               |        | 6.9 E-1                                                   | 32.5      | 32         | 0.0230                 | 6.0116               | Y          |                              |  | Y       | 1.61 E-1  | 1.6 E+7    | 1.52 E+7               | 0.0706               | 24.8927   | Y |
| PGN0192              | PG1875 | <i>hypothetical protein PG_2144</i>                       |           |            |                        |                      |            |                              |  |         |           |            |                        |                      |           |   |
| PG2145               |        | 6.92 E-2                                                  | 4.3       | 13         | -1.6034                | 4.1109               | Y          |                              |  | G       | 9.37 E-4  | 9.14 E+5   | 1.93 E+6               | -1.0774              | 21.4384   | G |
| PGN0193              | PG1876 | <i>polysaccharide deacetylase</i>                         |           |            |                        |                      |            |                              |  |         |           |            |                        |                      |           |   |
| PG2147               |        | 4.75 E-1                                                  | 11.1      | 8          | 0.4755                 | 4.2573               | Y          |                              |  | Y       | 3.35 E-2  | 2.31 E+6   | 1.65 E+6               | 0.4832               | 21.9164   | Y |
| PGN0195              | PG1878 | <i>xpt xanthine phosphoribosyltransferase</i>             |           |            |                        |                      |            |                              |  |         |           |            |                        |                      |           |   |
| PG2150               |        | 5.52 E-3                                                  | 16.3      | 3          | 2.4381                 | 4.2673               | R          |                              |  | R       | 0         | 5.39 E+6   | 1.26 E+6               | 2.1004               | 22.6634   | R |
| PGN0198              | PG1881 | <i>LysM domain protein</i>                                |           |            |                        |                      |            |                              |  |         |           |            |                        |                      |           |   |
| PG2155               |        | 2.96 E-2                                                  | 23.1      | 9          | 1.3601                 | 5.0046               | Y          |                              |  | R       | 1.14 E-6  | 3.14 E+7   | 1.06 E+7               | 1.5628               | 25.3260   | R |
| PGN0200              | PG1883 | <i>lipoprotein putative</i>                               |           |            |                        |                      |            |                              |  |         |           |            |                        |                      |           |   |
| PG2156               |        | 6.69 E-1                                                  | 1.7       | 1.5        | 0.1901                 | 1.6832               | Y          |                              |  | G       | 0         | 1.85 E+3   | 7.56 E+4               | -5.3524              | 16.2410   | Y |
| PGN0201              | PG1884 | <i>conserved hypothetical protein TIGR00046</i>           |           |            |                        |                      |            |                              |  |         |           |            |                        |                      |           |   |
| PG2157               |        | 6.87 E-1                                                  | 29.9      | 30.5       | -0.0264                | 5.9176               | Y          |                              |  | Y       | 1.53 E-2  | 1.43 E+7   | 2.01 E+7               | -0.4959              | 25.0344   | Y |
| PGN0202              | PG1885 | <i>glutamine cyclotransferase-related protein</i>         |           |            |                        |                      |            |                              |  |         |           |            |                        |                      |           |   |
| PG2158               |        | 2.15 E-1                                                  | 4.3       | 1          | 2.0970                 | 2.4001               | Y          |                              |  | R       | 0         | 1.75 E+6   | 1 E+3                  | 10.7730              | 20.7396   | R |
| PGN0203              | PG1886 | <i>conserved hypothetical protein</i>                     |           |            |                        |                      |            |                              |  |         |           |            |                        |                      |           |   |
| PG2159               |        | 6.94 E-1                                                  | 7.7       | 7.5        | 0.0381                 | 3.9261               | Y          |                              |  | Y       | 9.92 E-2  | 1.69 E+6   | 1.38 E+6               | 0.2886               | 21.5495   | Y |
| PGN0204              | PG1887 | <i>protoporphyrinogen oxidase</i>                         |           |            |                        |                      |            |                              |  |         |           |            |                        |                      |           |   |

| TIGR    |        | PP PPC / Pg Spectral Count                                                |           |            |                        |                      |            | PP PPC/ Pg Protein Intensity |  |         |           |            |                        | 33277                |           |   |
|---------|--------|---------------------------------------------------------------------------|-----------|------------|------------------------|----------------------|------------|------------------------------|--|---------|-----------|------------|------------------------|----------------------|-----------|---|
| PGN     | LANL   | q-value                                                                   | PP (Norm) | PPC (Norm) | log <sub>2</sub> Ratio | log <sub>2</sub> Sum | Regulation |                              |  | q-value | PP (Norm) | PPC (Norm) | log <sub>2</sub> Ratio | log <sub>2</sub> Sum | Consensus |   |
| PG2162  |        | 6.54 E-1                                                                  | 2.6       | 2          | 0.3601                 | 2.1912               | Y          |                              |  | R       | 1.52 E-5  | 1.26 E+6   | 3.44 E+5               | 1.8728               | 20.6151   | R |
| PGN0206 | PG1889 | <i>lpxB lipid A disaccharide synthase</i>                                 |           |            |                        |                      |            |                              |  |         |           |            |                        |                      |           |   |
| PG2163  |        | 3.76 E-1                                                                  | 15.4      | 21.5       | -0.4812                | 5.2056               | Y          |                              |  | G       | 8.02 E-8  | 4.76 E+6   | 1.14 E+7               | -1.2631              | 23.9486   | G |
| PGN0207 | PG1890 | <i>surE stationary-phase survival protein SurE</i>                        |           |            |                        |                      |            |                              |  |         |           |            |                        |                      |           |   |
| PG2164  |        | 1.02 E-1                                                                  | 14.5      | 27         | -0.8923                | 5.3766               | Y          |                              |  | G       | 7.53 E-4  | 8.37 E+6   | 1.74 E+7               | -1.0569              | 24.6204   | G |
| PGN0208 | PG1891 | <i>peptidyl-prolyl cis-trans isomerase FKBP-type</i>                      |           |            |                        |                      |            |                              |  |         |           |            |                        |                      |           |   |
| PG2165  |        | 5.3 E-8                                                                   | 47.9      | 7          | 2.7751                 | 5.7792               | R          |                              |  | R       | 0         | 3.13 E+7   | 4 E+6                  | 2.9676               | 25.0739   | R |
| PGN0209 | PG1892 | <i>glyS glycyl-tRNA synthetase</i>                                        |           |            |                        |                      |            |                              |  |         |           |            |                        |                      |           |   |
| PG2078  |        | 2.74 E-1                                                                  | 1.7       | 5          | -1.5468                | 2.7466               | Y          |                              |  | Y       | 2.08 E-3  | 2.83 E+5   | 7.07 E+5               | -1.3197              | 19.9167   | Y |
| PGN0211 | PG1816 | <i>conserved hypothetical protein</i>                                     |           |            |                        |                      |            |                              |  |         |           |            |                        |                      |           |   |
| PG0104  |        | 1.5 E-1                                                                   | 1.7       | 6.5        | -1.9253                | 3.0376               | Y          |                              |  | Y       | 4.34 E-2  | 7.39 E+5   | 1.87 E+6               | -1.3425              | 21.3172   | Y |
| PGN0221 | PG0091 | <i>topB-1 DNA topoisomerase III</i>                                       |           |            |                        |                      |            |                              |  |         |           |            |                        |                      |           |   |
| PG0108  |        | 5.74 E-1                                                                  | 18.8      | 16         | 0.2345                 | 5.1220               | Y          |                              |  | Y       | 1.69 E-2  | 6.76 E+6   | 4.66 E+6               | 0.5372               | 23.4453   | Y |
| PGN0224 | PG0094 | <i>epsD UDP-N-acetyl-D-mannosaminuronic acid dehydrogenase</i>            |           |            |                        |                      |            |                              |  |         |           |            |                        |                      |           |   |
| PG0111  |        | 6.41 E-1                                                                  | 6.0       | 5          | 0.2605                 | 3.4581               | Y          |                              |  | R       | 1.65 E-8  | 1.34 E+6   | 5.62 E+5               | 1.2493               | 20.8552   | R |
| PGN0228 | PG0097 | <i>capsular polysaccharide biosynthesis gene putative</i>                 |           |            |                        |                      |            |                              |  |         |           |            |                        |                      |           |   |
| PG0118  |        | 6.85 E-1                                                                  | 29.1      | 28.5       | 0.0297                 | 5.8478               | Y          |                              |  | R       | 3.31 E-10 | 1.7 E+7    | 4.65 E+6               | 1.8679               | 24.3666   | R |
| PGN0229 |        |                                                                           |           |            |                        |                      |            |                              |  |         |           |            |                        |                      |           |   |
| PG0118  |        | 6.69 E-1                                                                  | 12.0      | 11         | 0.1230                 | 4.5223               | Y          |                              |  | G       | 5.59 E-4  | 1.53 E+6   | 3.85 E+6               | -1.3282              | 22.3603   | Y |
| PGN0232 | PG0103 | <i>glycosyl transferase group 2 family protein</i>                        |           |            |                        |                      |            |                              |  |         |           |            |                        |                      |           |   |
| PG0119  |        | 2.55 E-1                                                                  | 7.7       | 14         | -0.8623                | 4.4397               | Y          |                              |  | Y       | 3.45 E-3  | 2.81 E+6   | 5.6 E+6                | -0.9958              | 23.0022   | Y |
| PGN0233 | PG0104 | <i>glycosyl transferase WecB/TagA/CpsF family</i>                         |           |            |                        |                      |            |                              |  |         |           |            |                        |                      |           |   |
| PG0120  |        | 3.31 E-1                                                                  | 20.5      | 14         | 0.5527                 | 5.1100               | Y          |                              |  | R       | 5.19 E-8  | 9.81 E+6   | 3.73 E+6               | 1.3954               | 23.6910   | R |
| PGN0234 | PG0105 | <i>epsC UDP-N-acetylglucosamine 2-epimerase</i>                           |           |            |                        |                      |            |                              |  |         |           |            |                        |                      |           |   |
| PG0121  |        | 0                                                                         | 371.4     | 69         | 2.4281                 | 8.7825               | R          |                              |  | R       | 4.01 E-7  | 3.09 E+8   | 1.43 E+8               | 1.1141               | 28.7494   | R |
| PGN0235 | PG0106 | <i>hup-1 DNA-binding protein HU</i>                                       |           |            |                        |                      |            |                              |  |         |           |            |                        |                      |           |   |
| PG0123  |        | 3.21 E-1                                                                  | 1.7       | 4.5        | -1.3948                | 2.6349               | Y          |                              |  | Y       | 1.72 E-3  | 1.85 E+3   | 1.06 E+6               | -9.1672              | 20.0234   | Y |
| PGN0236 | PG0107 | <i>hypothetical protein PG_0123</i>                                       |           |            |                        |                      |            |                              |  |         |           |            |                        |                      |           |   |
| PG0125  |        | 4.15 E-1                                                                  | 2.6       | 5          | -0.9619                | 2.9197               | Y          |                              |  | Y       | 3.52 E-3  | 9.2 E+4    | 9.17 E+5               | -3.3170              | 19.9443   | Y |
| PGN0238 | PG0109 | <i>hypothetical protein PG_0125</i>                                       |           |            |                        |                      |            |                              |  |         |           |            |                        |                      |           |   |
| PG0126  |        | 6.55 E-1                                                                  | 5.1       | 6          | -0.2249                | 3.4769               | Y          |                              |  | Y       | 1.59 E-3  | 1.91 E+6   | 3.46 E+6               | -0.8544              | 22.3560   | Y |
| PGN0239 | PG0110 | <i>type I phosphodiesterase/nucleotide pyrophosphatase family protein</i> |           |            |                        |                      |            |                              |  |         |           |            |                        |                      |           |   |
| PG0127  |        | 6.97 E-1                                                                  | 2.6       | 2.5        | 0.0381                 | 2.3411               | Y          |                              |  | R       | 0         | 2.16 E+6   | 1.7 E+5                | 3.6719               | 21.1547   | R |
| PGN0240 | PG0112 | <i>hemH ferrochelatase</i>                                                |           |            |                        |                      |            |                              |  |         |           |            |                        |                      |           |   |

| TIGR    |        | PP PPC / Pg Spectral Count                                     |           |            |                        |                      |            | PP PPC/ Pg Protein Intensity |  |         |           |            |                        | 33277                |           |   |
|---------|--------|----------------------------------------------------------------|-----------|------------|------------------------|----------------------|------------|------------------------------|--|---------|-----------|------------|------------------------|----------------------|-----------|---|
| PGN     | LANL   | q-value                                                        | PP (Norm) | PPC (Norm) | log <sub>2</sub> Ratio | log <sub>2</sub> Sum | Regulation |                              |  | q-value | PP (Norm) | PPC (Norm) | log <sub>2</sub> Ratio | log <sub>2</sub> Sum | Consensus |   |
| PG0128  |        | 6.97 E-1                                                       | 2.6       | 2.5        | 0.0381                 | 2.3411               | Y          |                              |  | R       | 0         | 4.82 E+5   | 1.13 E+5               | 2.0969               | 19.1831   | R |
| PGN0241 | PG0113 | <i>conserved domain protein</i>                                |           |            |                        |                      |            |                              |  |         |           |            |                        |                      |           |   |
| PG0129  |        | 6.69 E-1                                                       | 9.4       | 10         | -0.0874                | 4.2789               | Y          |                              |  | Y       | 1.77 E-1  | 2.35 E+6   | 2.2 E+6                | 0.0972               | 22.1155   | Y |
| PGN0242 | PG0114 | <i>mannosyltransferase</i>                                     |           |            |                        |                      |            |                              |  |         |           |            |                        |                      |           |   |
| PG0130  |        | 6.37 E-1                                                       | 157.4     | 152        | 0.0507                 | 8.2735               | Y          |                              |  | Y       | 1.88 E-1  | 1.43 E+8   | 1.45 E+8               | -0.0238              | 28.0990   | Y |
| PGN0243 | PG0115 | <i>gpm phosphoglycerate mutase</i>                             |           |            |                        |                      |            |                              |  |         |           |            |                        |                      |           |   |
| PG0133  |        | 6.69 E-1                                                       | 1.7       | 1.5        | 0.1901                 | 1.6832               | Y          |                              |  | G       | 0         | 1.85 E+3   | 7.82 E+4               | -5.4011              | 16.2886   | Y |
| PGN0246 | PG0118 | <i>hypothetical protein PG_0133</i>                            |           |            |                        |                      |            |                              |  |         |           |            |                        |                      |           |   |
| PG0134  |        | 5.17 E-1                                                       | 3.4       | 2          | 0.7751                 | 2.4390               | Y          |                              |  | Y       | 3.88 E-2  | 9.02 E+5   | 5.33 E+5               | 0.7591               | 20.4530   | Y |
| PGN0247 | PG0119 | <i>mgtE magnesium transporter</i>                              |           |            |                        |                      |            |                              |  |         |           |            |                        |                      |           |   |
| PG0136  |        | 4.02 E-1                                                       | 4.3       | 2          | 1.0970                 | 2.6504               | Y          |                              |  | R       | 0         | 1.36 E+6   | 5.22 E+5               | 1.3862               | 20.8468   | R |
| PGN0249 | PG0122 | <i>hypothetical protein PG_0136</i>                            |           |            |                        |                      |            |                              |  |         |           |            |                        |                      |           |   |
| PG0137  |        | 2.93 E-3                                                       | 124.1     | 183        | -0.5607                | 8.2624               | G          |                              |  | G       | 3.51 E-5  | 5.84 E+7   | 1.11 E+8               | -0.9201              | 27.3323   | G |
| PGN0250 | PG0123 | <i>pepD-1 aminoacyl-histidine dipeptidase</i>                  |           |            |                        |                      |            |                              |  |         |           |            |                        |                      |           |   |
| PG0138  |        | 9.03 E-2                                                       | 82.1      | 110        | -0.4213                | 7.5860               | Y          |                              |  | Y       | 2.47 E-3  | 1.12 E+8   | 1.86 E+8               | -0.7243              | 28.1501   | Y |
| PGN0251 | PG0124 | <i>fabD malonyl CoA-acyl carrier protein transacylase</i>      |           |            |                        |                      |            |                              |  |         |           |            |                        |                      |           |   |
| PG0139  |        | 6.78 E-1                                                       | 6.8       | 6.5        | 0.0747                 | 3.7383               | Y          |                              |  | Y       | 4.5 E-2   | 2.16 E+6   | 1.12 E+6               | 0.9507               | 21.6419   | Y |
| PGN0252 | PG0125 | <i>membrane-bound lytic murein transglycosylase D putative</i> |           |            |                        |                      |            |                              |  |         |           |            |                        |                      |           |   |
| PG0140  |        | 6.69 E-1                                                       | 1.7       | 2          | -0.2249                | 1.8919               | Y          |                              |  | G       | 0         | 1.85 E+3   | 8.51 E+5               | -8.8458              | 19.7027   | G |
| PGN0253 | PG0127 | <i>hypothetical protein PG_0140</i>                            |           |            |                        |                      |            |                              |  |         |           |            |                        |                      |           |   |
| PG0141  |        | 6.83 E-1                                                       | 20.5      | 20         | 0.0381                 | 5.3411               | Y          |                              |  | Y       | 3.72 E-2  | 9.14 E+6   | 1.19 E+7               | -0.3821              | 24.3281   | Y |
| PGN0254 | PG0128 | <i>spo0J spo0J protein</i>                                     |           |            |                        |                      |            |                              |  |         |           |            |                        |                      |           |   |
| PG0142  |        | 1.86 E-1                                                       | 5.1       | 11.5       | -1.1635                | 4.0561               | Y          |                              |  | Y       | 1.32 E-1  | 6.95 E+6   | 5.54 E+6               | 0.3278               | 23.5737   | Y |
| PGN0255 | PG0129 | <i>soj Spo0J regulator protein</i>                             |           |            |                        |                      |            |                              |  |         |           |            |                        |                      |           |   |
| PG0143  |        | 2.08 E-2                                                       | 11.1      | 27.5       | -1.3058                | 5.2714               | Y          |                              |  | Y       | 9.12 E-3  | 3.17 E+6   | 5.41 E+6               | -0.7727              | 23.0327   | Y |
| PGN0256 | PG0130 | <i>hydrolase carbon-nitrogen family</i>                        |           |            |                        |                      |            |                              |  |         |           |            |                        |                      |           |   |
| PG0144  |        | 6.92 E-2                                                       | 14.5      | 28.5       | -0.9703                | 5.4278               | Y          |                              |  | Y       | 3.17 E-3  | 6.22 E+6   | 1.29 E+7               | -1.0533              | 24.1889   | Y |
| PGN0257 | PG0131 | <i>conserved hypothetical protein</i>                          |           |            |                        |                      |            |                              |  |         |           |            |                        |                      |           |   |
|         |        | 6.61 E-1                                                       | 11.1      | 10         | 0.1536                 | 4.4008               | Y          |                              |  | Y       | 1.05 E-1  | 7.21 E+6   | 5.72 E+6               | 0.3340               | 23.6245   | Y |
| PGN0258 |        |                                                                |           |            |                        |                      |            |                              |  |         |           |            |                        |                      |           |   |
| PG0146  |        | 6.69 E-1                                                       | 1.7       | 1.5        | 0.1901                 | 1.6832               | Y          |                              |  | G       | 0         | 1.85 E+3   | 4.41 E+5               | -7.8960              | 18.7558   | Y |
| PGN0259 | PG0134 | <i>hypothetical protein PG_0146</i>                            |           |            |                        |                      |            |                              |  |         |           |            |                        |                      |           |   |
| PG0148  |        | 1.45 E-1                                                       | 5.1       | 1          | 2.3601                 | 2.6168               | Y          |                              |  | R       | 0         | 1.23 E+6   | 1 E+3                  | 10.2697              | 20.2367   | R |
| PGN0261 | PG0136 | <i>sigma-54-dependent transcriptional regulator</i>            |           |            |                        |                      |            |                              |  |         |           |            |                        |                      |           |   |

| TIGR    |        | PP PPC / Pg Spectral Count                                   |           |            |                        |                      |            | PP PPC/ Pg Protein Intensity |  |         |           |            |                        | 33277                |           |   |
|---------|--------|--------------------------------------------------------------|-----------|------------|------------------------|----------------------|------------|------------------------------|--|---------|-----------|------------|------------------------|----------------------|-----------|---|
| PGN     | LANL   | q-value                                                      | PP (Norm) | PPC (Norm) | log <sub>2</sub> Ratio | log <sub>2</sub> Sum | Regulation |                              |  | q-value | PP (Norm) | PPC (Norm) | log <sub>2</sub> Ratio | log <sub>2</sub> Sum | Consensus |   |
| PG0149  |        | 6.69 E-1                                                     | 2.6       | 3          | -0.2249                | 2.4769               | Y          |                              |  | Y       | 9.69 E-2  | 7.01 E+5   | 9.12 E+5               | -0.3794              | 20.6209   | Y |
| PGN0262 | PG0137 | <i>conserved domain protein</i>                              |           |            |                        |                      |            |                              |  |         |           |            |                        |                      |           |   |
| PG0150  |        | 6.69 E-1                                                     | 1.7       | 2          | -0.2249                | 1.8919               | Y          |                              |  | G       | 0         | 1.85 E+3   | 1.14 E+7               | -12.5834             | 23.4373   | G |
| PGN0263 | PG0138 | <i>conserved hypothetical protein TIGR01125</i>              |           |            |                        |                      |            |                              |  |         |           |            |                        |                      |           |   |
| PG0151  |        | 1.45 E-1                                                     | 5.1       | 1          | 2.3601                 | 2.6168               | Y          |                              |  | R       | 6.34 E-7  | 1.45 E+6   | 1 E+3                  | 10.5009              | 20.4677   | R |
| PGN0264 | PG0139 | <i>ftsY signal recognition particle-docking protein FtsY</i> |           |            |                        |                      |            |                              |  |         |           |            |                        |                      |           |   |
| PG0152  |        | 5.47 E-3                                                     | 9.4       | 28.5       | -1.5984                | 5.2446               | G          |                              |  | Y       | 5.67 E-2  | 2.78 E+6   | 3.55 E+6               | -0.3542              | 22.5936   | G |
| PGN0265 | PG0140 | <i>nspC carboxynorspermidine decarboxylase</i>               |           |            |                        |                      |            |                              |  |         |           |            |                        |                      |           |   |
| PG0153  |        | 2.71 E-1                                                     | 101.8     | 121.5      | -0.2549                | 7.8030               | Y          |                              |  | G       | 2.14 E-5  | 5.23 E+7   | 8.04 E+7               | -0.6199              | 26.9837   | G |
| PGN0266 | PG0141 | <i>aspS aspartyl-tRNA synthetase</i>                         |           |            |                        |                      |            |                              |  |         |           |            |                        |                      |           |   |
| PG0156  |        | 5.17 E-1                                                     | 1.7       | 3          | -0.8099                | 2.2361               | Y          |                              |  | Y       | 7.27 E-3  | 1.85 E+3   | 6.07 E+5               | -8.3570              | 19.2151   | Y |
| PGN0268 | PG0143 | <i>modification methylase HemK family</i>                    |           |            |                        |                      |            |                              |  |         |           |            |                        |                      |           |   |
| PG0159  |        | 4.61 E-3                                                     | 516.0     | 625        | -0.2766                | 10.1560              | G          |                              |  | Y       | 7.25 E-2  | 4.46 E+8   | 4.94 E+8               | -0.1463              | 29.8075   | G |
| PGN0271 | PG0146 | <i>pepO endopeptidase PepO</i>                               |           |            |                        |                      |            |                              |  |         |           |            |                        |                      |           |   |
| PG0160  |        | 5.8 E-1                                                      | 78.7      | 73         | 0.1088                 | 7.2453               | Y          |                              |  | Y       | 1.27 E-1  | 5.52 E+7   | 6.05 E+7               | -0.1319              | 26.7867   | Y |
| PGN0272 | PG0147 | <i>conserved domain protein</i>                              |           |            |                        |                      |            |                              |  |         |           |            |                        |                      |           |   |
| PG0163  |        | 6.61 E-1                                                     | 9.4       | 10.5       | -0.1578                | 4.3156               | Y          |                              |  | Y       | 7.32 E-2  | 3.75 E+6   | 2.71 E+6               | 0.4653               | 22.6228   | Y |
| PGN0275 | PG0150 | <i>pfk phosphofructokinase</i>                               |           |            |                        |                      |            |                              |  |         |           |            |                        |                      |           |   |
| PG0166  |        | 6 E-1                                                        | 1.7       | 2.5        | -0.5468                | 2.0743               | Y          |                              |  | G       | 0         | 1.85 E+3   | 4.07 E+5               | -7.7796              | 18.6398   | G |
| PGN0278 | PG0153 | <i>pth peptidyl-tRNA hydrolase</i>                           |           |            |                        |                      |            |                              |  |         |           |            |                        |                      |           |   |
| PG0167  |        | 6.58 E-12                                                    | 127.5     | 37         | 1.7848                 | 7.3619               | R          |                              |  | R       | 0         | 1.4 E+8    | 3.03 E+7               | 2.2031               | 27.3407   | R |
| PGN0279 | PG0154 | <i>rplY ribosomal protein L25</i>                            |           |            |                        |                      |            |                              |  |         |           |            |                        |                      |           |   |
| PG0170  |        | 7.02 E-1                                                     | 131.8     | 131.5      | 0.0030                 | 8.0404               | Y          |                              |  | Y       | 8.97 E-2  | 7.56 E+7   | 6.81 E+7               | 0.1509               | 27.0986   | Y |
| PGN0281 | PG0156 | <i>metG methionyl-tRNA synthetase</i>                        |           |            |                        |                      |            |                              |  |         |           |            |                        |                      |           |   |
| PG0171  |        | 1.77 E-1                                                     | 13.7      | 23.5       | -0.7795                | 5.2169               | Y          |                              |  | Y       | 1.4 E-1   | 7.5 E+6    | 8.41 E+6               | -0.1643              | 23.9237   | Y |
| PGN0282 | PG0157 | <i>5'-nucleotidase family protein</i>                        |           |            |                        |                      |            |                              |  |         |           |            |                        |                      |           |   |
| PG0172  |        | 6.69 E-1                                                     | 1.7       | 1.5        | 0.1901                 | 1.6832               | Y          |                              |  | G       | 0         | 1.85 E+3   | 1.78 E+5               | -6.5842              | 17.4529   | Y |
| PGN0283 | PG0158 | <i>exonuclease</i>                                           |           |            |                        |                      |            |                              |  |         |           |            |                        |                      |           |   |
|         |        | 1.56 E-1                                                     | 6.0       | 1.5        | 1.9975                 | 2.9049               | Y          |                              |  | R       | 0         | 2.02 E+6   | 3.35 E+5               | 2.5881               | 21.1659   | R |
| PGN0285 |        |                                                              |           |            |                        |                      |            |                              |  |         |           |            |                        |                      |           |   |
| PG0178  |        | 0                                                            | 2104.9    | 3146.5     | -0.5800                | 12.3585              | G          |                              |  | G       | 6.61 E-4  | 1.15 E+9   | 1.71 E+9               | -0.5709              | 31.4148   | G |
| PGN0287 | PG0163 |                                                              |           |            |                        |                      |            |                              |  |         |           |            |                        |                      |           |   |
| PG0179  |        | 1.53 E-2                                                     | 162.6     | 217        | -0.4166                | 8.5682               | Y          |                              |  | Y       | 1.07 E-2  | 1.06 E+8   | 1.65 E+8               | -0.6375              | 28.0162   | Y |
| PGN0288 | PG0164 | <i>hypothetical protein PG_0179</i>                          |           |            |                        |                      |            |                              |  |         |           |            |                        |                      |           |   |

| TIGR    |        | PP PPC / Pg Spectral Count                         |           |            |                        |                      |            | PP PPC/ Pg Protein Intensity |  |         |           |            |                        | 33277                |           |   |
|---------|--------|----------------------------------------------------|-----------|------------|------------------------|----------------------|------------|------------------------------|--|---------|-----------|------------|------------------------|----------------------|-----------|---|
| PGN     | LANL   | q-value                                            | PP (Norm) | PPC (Norm) | log <sub>2</sub> Ratio | log <sub>2</sub> Sum | Regulation |                              |  | q-value | PP (Norm) | PPC (Norm) | log <sub>2</sub> Ratio | log <sub>2</sub> Sum | Consensus |   |
| PG0180  |        | 5.47 E-12                                          | 14.5      | 83         | -2.5125                | 6.6080               | G          |                              |  | G       | 5.28 E-12 | 7.96 E+6   | 3.12 E+7               | -1.9707              | 25.2234   | G |
| PGN0289 | PG0165 | <i>lipoprotein putative</i>                        |           |            |                        |                      |            |                              |  |         |           |            |                        |                      |           |   |
| PG0181  |        | 3.03 E-2                                           | 76.2      | 110.5      | -0.5371                | 7.5442               | Y          |                              |  | Y       | 1.09 E-3  | 5.14 E+7   | 1.21 E+8               | -1.2347              | 27.3603   | Y |
| PGN0290 | PG0166 | <i>immunoreactive 32 kDa antigen PG49</i>          |           |            |                        |                      |            |                              |  |         |           |            |                        |                      |           |   |
| PG0182  |        | 2.44 E-8                                           | 109.5     | 216.5      | -0.9831                | 8.3488               | G          |                              |  | G       | 1.65 E-9  | 7.77 E+7   | 1.44 E+8               | -0.8873              | 27.7226   | G |
| PGN0291 | PG0167 | <i>von Willebrand factor type A domain protein</i> |           |            |                        |                      |            |                              |  |         |           |            |                        |                      |           |   |
|         |        | 4.23 E-1                                           | 2.6       | 1          | 1.3601                 | 1.8347               | Y          |                              |  | R       | 0         | 2.27 E+6   | 1 E+3                  | 11.1476              | 21.1141   | R |
| PGN0292 |        |                                                    |           |            |                        |                      |            |                              |  |         |           |            |                        |                      |           |   |
| PG0185  |        | 1.07 E-7                                           | 3902.6    | 3413.5     | 0.1932                 | 12.8369              | R          |                              |  | G       | 4.08 E-6  | 3.63 E+9   | 5.1 E+9                | -0.4891              | 33.0235   | Y |
| PGN0293 | PG0170 | <i>ragA ragA protein</i>                           |           |            |                        |                      |            |                              |  |         |           |            |                        |                      |           |   |
| PG0186  |        | 3.06 E-2                                           | 1035.3    | 1153       | -0.1553                | 11.0956              | Y          |                              |  | G       | 3.25 E-4  | 1.74 E+9   | 2.35 E+9               | -0.4334              | 31.9293   | G |
| PGN0294 | PG0171 | <i>ragB lipoprotein RagB</i>                       |           |            |                        |                      |            |                              |  |         |           |            |                        |                      |           |   |
|         |        | 4.75 E-1                                           | 72.7      | 81.5       | -0.1642                | 7.2689               | Y          |                              |  | Y       | 3.11 E-2  | 2.68 E+8   | 4.13 E+8               | -0.6211              | 29.3435   | Y |
| PGN0295 |        |                                                    |           |            |                        |                      |            |                              |  |         |           |            |                        |                      |           |   |
| PG0188  |        | 6.9 E-1                                            | 26.5      | 27         | -0.0256                | 5.7421               | Y          |                              |  | Y       | 4.87 E-2  | 1.34 E+7   | 1.02 E+7               | 0.3890               | 24.4898   | Y |
| PGN0296 | PG0172 | <i>lipoprotein putative</i>                        |           |            |                        |                      |            |                              |  |         |           |            |                        |                      |           |   |
| PG0189  |        | 4.82 E-2                                           | 1.7       | 9          | -2.3948                | 3.4211               | Y          |                              |  | G       | 1.56 E-7  | 1.85 E+3   | 2.38 E+6               | -10.3303             | 21.1851   | G |
| PGN0297 | PG0173 | <i>hypothetical protein PG_0189</i>                |           |            |                        |                      |            |                              |  |         |           |            |                        |                      |           |   |
| PG0190  |        | 2.52 E-1                                           | 3.4       | 8          | -1.2249                | 3.5138               | Y          |                              |  | Y       | 1.63 E-2  | 9.27 E+5   | 2.78 E+6               | -1.5864              | 21.8238   | Y |
| PGN0298 | PG0174 | <i>uppS undecaprenyl diphosphate synthase</i>      |           |            |                        |                      |            |                              |  |         |           |            |                        |                      |           |   |
| PG0191  |        | 3.05 E-1                                           | 47.1      | 59.5       | -0.3384                | 6.7355               | Y          |                              |  | Y       | 8.65 E-2  | 2.92 E+7   | 2.61 E+7               | 0.1625               | 25.7208   | Y |
| PGN0299 | PG0175 | <i>outer membrane protein putative</i>             |           |            |                        |                      |            |                              |  |         |           |            |                        |                      |           |   |
| PG0192  |        | 2.83 E-3                                           | 161.7     | 106.5      | 0.6026                 | 8.0673               | R          |                              |  | Y       | 1.42 E-2  | 9.62 E+7   | 5.88 E+7               | 0.7106               | 27.2082   | R |
| PGN0300 | PG0176 | <i>ompH-1 cationic outer membrane protein OmpH</i> |           |            |                        |                      |            |                              |  |         |           |            |                        |                      |           |   |
| PG0193  |        | 8.96 E-2                                           | 103.5     | 76.5       | 0.4366                 | 7.4921               | Y          |                              |  | Y       | 1.96 E-1  | 1.09 E+8   | 1.1 E+8                | -0.0138              | 27.7060   | Y |
| PGN0301 | PG0177 | <i>ompH-2 cationic outer membrane protein OmpH</i> |           |            |                        |                      |            |                              |  |         |           |            |                        |                      |           |   |
| PG0195  |        | 3.22 E-6                                           | 101.0     | 186        | -0.8814                | 8.1647               | G          |                              |  | Y       | 4.8 E-3   | 4.49 E+7   | 9.18 E+7               | -1.0300              | 27.0264   | G |
| PGN0302 | PG0179 | <i>rubrerythrin</i>                                |           |            |                        |                      |            |                              |  |         |           |            |                        |                      |           |   |
| PG0196  |        | 1.57 E-1                                           | 366.2     | 413.5      | -0.1752                | 9.6068               | Y          |                              |  | Y       | 1.04 E-1  | 2.98 E+8   | 3.21 E+8               | -0.1058              | 29.2068   | Y |
| PGN0303 | PG0180 | <i>peptidase M16 family</i>                        |           |            |                        |                      |            |                              |  |         |           |            |                        |                      |           |   |
| PG0198  |        | 6.69 E-1                                           | 1.7       | 2          | -0.2249                | 1.8919               | Y          |                              |  | G       | 0         | 1.85 E+3   | 1.04 E+6               | -9.1314              | 19.9877   | G |
| PGN0306 | PG0182 | <i>conserved hypothetical protein</i>              |           |            |                        |                      |            |                              |  |         |           |            |                        |                      |           |   |
| PG0199  |        | 5.17 E-1                                           | 1.7       | 3          | -0.8099                | 2.2361               | Y          |                              |  | G       | 0         | 1.85 E+3   | 7.23 E+5               | -8.6107              | 19.4681   | G |
| PGN0307 | PG0183 | <i>TatD family protein</i>                         |           |            |                        |                      |            |                              |  |         |           |            |                        |                      |           |   |



| TIGR    |        | PP PPC / Pg Spectral Count                                                         |           |            |                        |                      |            | PP PPC/ Pg Protein Intensity |  |         |           |            |                        | 33277                |           |   |
|---------|--------|------------------------------------------------------------------------------------|-----------|------------|------------------------|----------------------|------------|------------------------------|--|---------|-----------|------------|------------------------|----------------------|-----------|---|
| PGN     | LANL   | q-value                                                                            | PP (Norm) | PPC (Norm) | log <sub>2</sub> Ratio | log <sub>2</sub> Sum | Regulation |                              |  | q-value | PP (Norm) | PPC (Norm) | log <sub>2</sub> Ratio | log <sub>2</sub> Sum | Consensus |   |
| PG0201  |        | 3.82 E-1                                                                           | 1.7       | 4          | -1.2249                | 2.5138               | Y          |                              |  | G       | 4.31 E-7  | 1.85 E+3   | 1.84 E+5               | -6.6391              | 17.5073   | G |
| PGN0309 | PG0184 | <i>rnpA ribonuclease P protein component</i>                                       |           |            |                        |                      |            |                              |  |         |           |            |                        |                      |           |   |
| PG0202  |        | 4.23 E-1                                                                           | 6.8       | 4          | 0.7751                 | 3.4390               | Y          |                              |  | R       | 2.81 E-5  | 4.21 E+6   | 8.42 E+5               | 2.3210               | 22.2675   | R |
| PGN0310 | PG0185 | <i>uroporphyrinogen-III synthase HemD putative</i>                                 |           |            |                        |                      |            |                              |  |         |           |            |                        |                      |           |   |
| PG0205  |        | 1.4 E-1                                                                            | 14.5      | 6.5        | 1.1621                 | 4.3955               | Y          |                              |  | Y       | 2.31 E-2  | 5.01 E+6   | 3.35 E+6               | 0.5805               | 22.9964   | Y |
| PGN0313 | PG0188 | <i>prfC peptide chain release factor 3</i>                                         |           |            |                        |                      |            |                              |  |         |           |            |                        |                      |           |   |
| PG0209  |        | 6.69 E-1                                                                           | 1.7       | 2          | -0.2249                | 1.8919               | Y          |                              |  | G       | 6.68 E-8  | 1.85 E+3   | 2.05 E+5               | -6.7916              | 17.6583   | G |
| PGN0314 | PG0189 | <i>formate/nitrite transporter</i>                                                 |           |            |                        |                      |            |                              |  |         |           |            |                        |                      |           |   |
| PG0210  |        | 4.23 E-1                                                                           | 2.6       | 1          | 1.3601                 | 1.8347               | Y          |                              |  | R       | 0         | 1.74 E+5   | 1 E+3                  | 7.4469               | 17.4210   | R |
| PGN0315 | PG0190 | <i>precorrin-6x reductase/cobalamin biosynthetic protein CbiD</i>                  |           |            |                        |                      |            |                              |  |         |           |            |                        |                      |           |   |
| PG0211  |        | 6 E-1                                                                              | 5.1       | 6.5        | -0.3404                | 3.5403               | Y          |                              |  | Y       | 3.93 E-2  | 2.72 E+6   | 1.94 E+6               | 0.4867               | 22.1539   | Y |
| PGN0316 | PG0191 | <i>cbiGF cobalamin biosynthesis protein CbiG/precorrin-4 C11-methyltransferase</i> |           |            |                        |                      |            |                              |  |         |           |            |                        |                      |           |   |
| PG0213  |        | 2.25 E-1                                                                           | 6.8       | 2.5        | 1.4532                 | 3.2242               | Y          |                              |  | Y       | 2.41 E-2  | 1.29 E+6   | 5.9 E+5                | 1.1326               | 20.8440   | Y |
| PGN0318 | PG0193 | <i>precorrin-3 methylase/precorrin-8X methylmutase</i>                             |           |            |                        |                      |            |                              |  |         |           |            |                        |                      |           |   |
| PG0217  |        | 1.12 E-2                                                                           | 10.3      | 28         | -1.4473                | 5.2581               | Y          |                              |  | G       | 1.9 E-4   | 4.36 E+6   | 1.24 E+7               | -1.5057              | 23.9962   | G |
| PGN0322 | PG0197 | <i>hypothetical protein PG_0217</i>                                                |           |            |                        |                      |            |                              |  |         |           |            |                        |                      |           |   |
| PG0218  |        | 4.89 E-1                                                                           | 5.1       | 7.5        | -0.5468                | 3.6592               | Y          |                              |  | Y       | 1.53 E-2  | 1.13 E+6   | 2.64 E+6               | -1.2264              | 21.8435   | Y |
| PGN0323 | PG0198 | <i>hypothetical protein PG_0218</i>                                                |           |            |                        |                      |            |                              |  |         |           |            |                        |                      |           |   |
|         |        | 5.74 E-1                                                                           | 4.3       | 3          | 0.5121                 | 2.8636               | Y          |                              |  | Y       | 6.07 E-3  | 1.12 E+7   | 1.67 E+6               | 2.7523               | 23.6223   | Y |
| PGN0326 |        |                                                                                    |           |            |                        |                      |            |                              |  |         |           |            |                        |                      |           |   |
| PG0226  |        | 6.69 E-1                                                                           | 142.0     | 144.5      | -0.0248                | 8.1626               | Y          |                              |  | Y       | 5.98 E-2  | 7.61 E+7   | 8.39 E+7               | -0.1408              | 27.2531   | Y |
| PGN0329 | PG0206 | <i>transglutaminase-related protein</i>                                            |           |            |                        |                      |            |                              |  |         |           |            |                        |                      |           |   |
| PG0227  |        | 3.21 E-1                                                                           | 1.7       | 4.5        | -1.3948                | 2.6349               | Y          |                              |  | Y       | 1.99 E-3  | 1.85 E+3   | 6.91 E+5               | -8.5448              | 19.4023   | Y |
| PGN0330 | PG0207 | <i>radA DNA repair protein RadA</i>                                                |           |            |                        |                      |            |                              |  |         |           |            |                        |                      |           |   |
| PG0228  |        | 6.15 E-1                                                                           | 14.5      | 16.5       | -0.1818                | 4.9563               | Y          |                              |  | Y       | 1.75 E-1  | 8.69 E+6   | 8.38 E+6               | 0.0528               | 24.0247   | Y |
| PGN0331 | PG0208 | <i>DdaH family protein</i>                                                         |           |            |                        |                      |            |                              |  |         |           |            |                        |                      |           |   |
| PG0230  |        | 1.17 E-1                                                                           | 96.7      | 124.5      | -0.3647                | 7.7891               | Y          |                              |  | Y       | 6.61 E-3  | 9.04 E+7   | 1.45 E+8               | -0.6782              | 27.8085   | Y |
| PGN0333 | PG0209 | <i>transaldolase TalC putative</i>                                                 |           |            |                        |                      |            |                              |  |         |           |            |                        |                      |           |   |
| PG0231  |        | 6.69 E-1                                                                           | 3.4       | 4          | -0.2249                | 2.8919               | Y          |                              |  | R       | 1.15 E-7  | 4.35 E+5   | 2.5 E+5                | 0.7977               | 19.3876   | Y |
| PGN0334 | PG0211 | <i>conserved hypothetical protein</i>                                              |           |            |                        |                      |            |                              |  |         |           |            |                        |                      |           |   |
| PG0232  |        | 5.87 E-2                                                                           | 201.1     | 248.5      | -0.3055                | 8.8124               | Y          |                              |  | Y       | 3.28 E-2  | 1.95 E+8   | 2.38 E+8               | -0.2843              | 28.6904   | Y |
| PGN0335 | PG0212 | <i>zinc carboxypeptidase putative</i>                                              |           |            |                        |                      |            |                              |  |         |           |            |                        |                      |           |   |
|         |        | 1.32 E-2                                                                           | 2.6       | 13.5       | -2.3948                | 4.0060               | Y          |                              |  | G       | 2.76 E-5  | 5.68 E+5   | 2.2 E+6                | -1.9553              | 21.4030   | G |
| PGN0336 |        |                                                                                    |           |            |                        |                      |            |                              |  |         |           |            |                        |                      |           |   |



| TIGR    |        | PP PPC / Pg Spectral Count                         |           |            |                        |                      |            | PP PPC/ Pg Protein Intensity |  |         |           |            |                        | 33277                |           |   |
|---------|--------|----------------------------------------------------|-----------|------------|------------------------|----------------------|------------|------------------------------|--|---------|-----------|------------|------------------------|----------------------|-----------|---|
| PGN     | LANL   | q-value                                            | PP (Norm) | PPC (Norm) | log <sub>2</sub> Ratio | log <sub>2</sub> Sum | Regulation |                              |  | q-value | PP (Norm) | PPC (Norm) | log <sub>2</sub> Ratio | log <sub>2</sub> Sum | Consensus |   |
| PG0236  |        | 1.12 E-1                                           | 7.7       | 17         | -1.1424                | 4.6265               | Y          |                              |  | G       | 4.24 E-4  | 6.32 E+6   | 1.12 E+7               | -0.8310              | 24.0667   | G |
| PGN0341 | PG0215 | <i>hypothetical protein PG_0236</i>                |           |            |                        |                      |            |                              |  |         |           |            |                        |                      |           |   |
| PG0237  |        | 3.33 E-1                                           | 11.1      | 17         | -0.6119                | 4.8137               | Y          |                              |  | Y       | 8.91 E-3  | 2.55 E+6   | 1.82 E+6               | 0.4850               | 22.0614   | Y |
| PGN0342 | PG0216 | <i>ung uracil-DNA glycosylase</i>                  |           |            |                        |                      |            |                              |  |         |           |            |                        |                      |           |   |
| PG0240  |        | 2.25 E-1                                           | 1.7       | 5.5        | -1.6843                | 2.8503               | Y          |                              |  | G       | 0         | 1.85 E+3   | 6.14 E+5               | -8.3753              | 19.2333   | G |
| PGN0344 | PG0218 | <i>hydrolase haloacid dehalogenase-like family</i> |           |            |                        |                      |            |                              |  |         |           |            |                        |                      |           |   |
| PG0241  |        | 3.49 E-2                                           | 90.7      | 60.5       | 0.5842                 | 7.2403               | Y          |                              |  | R       | 6.52 E-11 | 1.1 E+8    | 3.93 E+7               | 1.4841               | 27.1535   | R |
| PGN0345 | PG0219 | <i>lipoprotein putative</i>                        |           |            |                        |                      |            |                              |  |         |           |            |                        |                      |           |   |
| PG0242  |        | 6.68 E-1                                           | 20.5      | 22         | -0.0994                | 5.4106               | Y          |                              |  | Y       | 6.45 E-2  | 4.97 E+6   | 3.84 E+6               | 0.3718               | 23.0708   | Y |
| PGN0346 | PG0220 | <i>conserved hypothetical protein TIGR00096</i>    |           |            |                        |                      |            |                              |  |         |           |            |                        |                      |           |   |
| PG0243  |        | 5.89 E-1                                           | 7.7       | 9.5        | -0.3029                | 4.1044               | Y          |                              |  | Y       | 8.23 E-2  | 3.61 E+6   | 4.7 E+6                | -0.3820              | 22.9855   | Y |
| PGN0347 | PG0221 | <i>hypothetical protein PG_0243</i>                |           |            |                        |                      |            |                              |  |         |           |            |                        |                      |           |   |
| PG0245  |        | 0                                                  | 94.1      | 9.5        | 3.3085                 | 6.6952               | R          |                              |  | R       | 0         | 5.73 E+7   | 3.68 E+6               | 3.9599               | 25.8619   | R |
| PGN0348 | PG0222 | <i>universal stress protein family</i>             |           |            |                        |                      |            |                              |  |         |           |            |                        |                      |           |   |
| PG0246  |        | 0                                                  | 220.8     | 27.5       | 3.0050                 | 7.9557               | R          |                              |  | Y       | 2.85 E-2  | 7.62 E+7   | 5.4 E+7                | 0.4976               | 26.9555   | R |
| PGN0349 | PG0223 | <i>hypothetical protein PG_0246</i>                |           |            |                        |                      |            |                              |  |         |           |            |                        |                      |           |   |
| PG0249  |        | 3.12 E-4                                           | 186.5     | 117        | 0.6729                 | 8.2457               | R          |                              |  | R       | 8.92 E-4  | 1.38 E+8   | 1.04 E+8               | 0.4168               | 27.8516   | R |
| PGN0351 | PG0226 | <i>oxaloacetate decarboxylase putative</i>         |           |            |                        |                      |            |                              |  |         |           |            |                        |                      |           |   |
| PG0253  |        | 6.05 E-2                                           | 6.8       | 1          | 2.7751                 | 2.9718               | Y          |                              |  | R       | 0         | 9.37 E+5   | 1 E+3                  | 9.8718               | 19.8391   | R |
| PGN0353 | PG0228 | <i>conserved hypothetical protein</i>              |           |            |                        |                      |            |                              |  |         |           |            |                        |                      |           |   |
| PG0254  |        | 3.2 E-6                                            | 120.6     | 54.5       | 1.1465                 | 7.4524               | R          |                              |  | R       | 2.97 E-12 | 5.67 E+7   | 2.71 E+7               | 1.0678               | 26.3198   | R |
| PGN0354 | PG0229 | <i>N utilization substance protein A putative</i>  |           |            |                        |                      |            |                              |  |         |           |            |                        |                      |           |   |
| PG0255  |        | 1.57 E-5                                           | 71.0      | 25.5       | 1.4777                 | 6.5927               | R          |                              |  | R       | 1.14 E-12 | 3.93 E+7   | 1.39 E+7               | 1.4944               | 25.6648   | R |
| PGN0355 | PG0230 | <i>infB translation initiation factor IF-2</i>     |           |            |                        |                      |            |                              |  |         |           |            |                        |                      |           |   |
| PG0257  |        | 6.61 E-1                                           | 9.4       | 10.5       | -0.1578                | 4.3156               | Y          |                              |  | Y       | 1.77 E-1  | 4.95 E+6   | 5.29 E+6               | -0.0967              | 23.2882   | Y |
| PGN0357 | PG0232 | <i>conserved hypothetical protein</i>              |           |            |                        |                      |            |                              |  |         |           |            |                        |                      |           |   |
| PG0258  |        | 1.22 E-1                                           | 41.1      | 26         | 0.6596                 | 6.0676               | Y          |                              |  | R       | 6.21 E-6  | 2.1 E+7    | 9.51 E+6               | 1.1442               | 24.8642   | R |
| PGN0358 | PG0233 | <i>ABC transporter ATP-binding protein</i>         |           |            |                        |                      |            |                              |  |         |           |            |                        |                      |           |   |
| PG0259  |        | 7.06 E-1                                           | 12.0      | 12         | -0.0025                | 4.5837               | Y          |                              |  | Y       | 8.29 E-3  | 7.54 E+6   | 4.76 E+6               | 0.6634               | 23.5526   | Y |
| PGN0359 | PG0235 | <i>conserved hypothetical protein</i>              |           |            |                        |                      |            |                              |  |         |           |            |                        |                      |           |   |
| PG0263  |        | 0                                                  | 101.0     | 12.5       | 3.0139                 | 6.8261               | R          |                              |  | R       | 2.11 E-13 | 4.53 E+7   | 1.19 E+7               | 1.9328               | 25.7689   | R |
| PGN0360 | PG0237 | <i>tyrS tyrosyl-tRNA synthetase</i>                |           |            |                        |                      |            |                              |  |         |           |            |                        |                      |           |   |
| PG0264  |        | 3.05 E-1                                           | 3.4       | 1          | 1.7751                 | 2.1449               | Y          |                              |  | R       | 0         | 6.82 E+5   | 1 E+3                  | 9.4130               | 19.3809   | R |
| PGN0361 | PG0238 | <i>glycosyl transferase group 2 family protein</i> |           |            |                        |                      |            |                              |  |         |           |            |                        |                      |           |   |

| TIGR    |        | PP PPC / Pg Spectral Count                                               |           |            |                        |                      |            |   | PP PPC/ Pg Protein Intensity |         |           |            |                        | 33277                |           |     |
|---------|--------|--------------------------------------------------------------------------|-----------|------------|------------------------|----------------------|------------|---|------------------------------|---------|-----------|------------|------------------------|----------------------|-----------|-----|
| PGN     | LANL   | q-value                                                                  | PP (Norm) | PPC (Norm) | log <sub>2</sub> Ratio | log <sub>2</sub> Sum | Regulation |   |                              | q-value | PP (Norm) | PPC (Norm) | log <sub>2</sub> Ratio | log <sub>2</sub> Sum | Consensus |     |
| PG0267  |        | 1.62 E-5                                                                 | 83.0      | 33         | 1.3306                 | 6.8580               | R          | ● | ●                            | R       | 0         | 3.98 E+7   | 1.33 E+7               | 1.5797               | 25.6624   | R ● |
| PGN0365 | PG0239 | <i>argS arginyl-tRNA synthetase</i>                                      |           |            |                        |                      |            |   |                              |         |           |            |                        |                      |           |     |
| PG0268  |        | 1.62 E-1                                                                 | 8.6       | 3          | 1.5121                 | 3.5306               | Y          | ● | ●                            | Y       | 1.19 E-1  | 8.17 E+5   | 1.16 E+6               | -0.5118              | 20.9184   | Y ● |
| PGN0366 | PG0240 | <i>trmU tRNA (5-methylaminomethyl-2-thiouridylate)-methyltransferase</i> |           |            |                        |                      |            |   |                              |         |           |            |                        |                      |           |     |
| PG0269  |        | 4.53 E-1                                                                 | 12.0      | 16         | -0.4175                | 4.8063               | Y          | ● | ●                            | Y       | 6.45 E-2  | 5.26 E+6   | 7.11 E+6               | -0.4344              | 23.5614   | Y ● |
| PGN0367 | PG0241 | <i>xth exodeoxyribonuclease III</i>                                      |           |            |                        |                      |            |   |                              |         |           |            |                        |                      |           |     |
| PG0270  |        | 1.9 E-1                                                                  | 12.0      | 5.5        | 1.1230                 | 4.1276               | Y          | ● | ●                            | Y       | 1.6 E-1   | 3.18 E+6   | 2.92 E+6               | 0.1239               | 22.5416   | Y ● |
| PGN0368 | PG0242 | <i>oxyR redox-sensitive transcriptional activator OxyR</i>               |           |            |                        |                      |            |   |                              |         |           |            |                        |                      |           |     |
| PG0271  |        | 2.32 E-1                                                                 | 12.0      | 20         | -0.7395                | 4.9991               | Y          | ● | ●                            | Y       | 9.94 E-2  | 5.13 E+6   | 6.58 E+6               | -0.3595              | 23.4813   | Y ● |
| PGN0369 | PG0243 | <i>ssb single-stranded binding protein</i>                               |           |            |                        |                      |            |   |                              |         |           |            |                        |                      |           |     |
| PG0272  |        | 5.89 E-1                                                                 | 1.7       | 1          | 0.7751                 | 1.4390               | Y          | ● | ●                            | R       | 0         | 3.17 E+5   | 1 E+3                  | 8.3077               | 18.2780   | R ● |
| PGN0370 | PG0244 | <i>CBS domain protein</i>                                                |           |            |                        |                      |            |   |                              |         |           |            |                        |                      |           |     |
| PG0275  |        | 2.74 E-1                                                                 | 29.1      | 20         | 0.5406                 | 5.6174               | Y          | ● | ●                            | Y       | 1.85 E-1  | 2.08 E+7   | 2.21 E+7               | -0.0864              | 25.3541   | Y ● |
| PGN0373 | PG0246 | <i>thioredoxin family protein</i>                                        |           |            |                        |                      |            |   |                              |         |           |            |                        |                      |           |     |
| PG0276  |        | 7.85 E-2                                                                 | 39.4      | 23         | 0.7751                 | 5.9625               | Y          | ● | ●                            | Y       | 6.61 E-2  | 1.52 E+7   | 1.12 E+7               | 0.4413               | 24.6518   | Y ● |
| PGN0374 | PG0248 | <i>conserved hypothetical protein</i>                                    |           |            |                        |                      |            |   |                              |         |           |            |                        |                      |           |     |
| PG1745  |        | 8.8 E-3                                                                  | 27.4      | 9.5        | 1.5272                 | 5.2048               | R          | ● | ●                            | Y       | 1.75 E-1  | 8.83 E+6   | 1.02 E+7               | -0.2038              | 24.1794   | Y ● |
| PGN0375 | PG1521 | <i>phosphoribulokinase family protein</i>                                |           |            |                        |                      |            |   |                              |         |           |            |                        |                      |           |     |
| PG1743  |        | 1.6 E-1                                                                  | 5.1       | 12         | -1.2249                | 4.0988               | Y          | ● | ●                            | G       | 6.05 E-4  | 2.39 E+6   | 7.07 E+6               | -1.5654              | 23.1723   | G ● |
| PGN0376 | PG1520 | <i>kdsA 2-dehydro-3-deoxyphosphooctonate aldolase</i>                    |           |            |                        |                      |            |   |                              |         |           |            |                        |                      |           |     |
| PG1741  |        | 3.18 E-3                                                                 | 339.7     | 258        | 0.3969                 | 9.2233               | R          | ● | ●                            | R       | 2.14 E-13 | 2.4 E+8    | 9.33 E+7               | 1.3662               | 28.3140   | R ● |
| PGN0377 | PG1518 | <i>aspA aspartate ammonia-lyase</i>                                      |           |            |                        |                      |            |   |                              |         |           |            |                        |                      |           |     |
| PG1739  |        | 4.75 E-1                                                                 | 3.4       | 5.5        | -0.6843                | 3.1575               | Y          | ● | ●                            | Y       | 2.94 E-2  | 1.16 E+6   | 6.09 E+5               | 0.9303               | 20.7547   | Y ● |
| PGN0378 | PG1517 | <i>conserved domain protein</i>                                          |           |            |                        |                      |            |   |                              |         |           |            |                        |                      |           |     |
| PG1735  |        | 6.69 E-1                                                                 | 1.7       | 1.5        | 0.1901                 | 1.6832               | Y          | ● | ●                            | G       | 0         | 1.85 E+3   | 1.72 E+5               | -6.5356              | 17.4048   | Y ● |
| PGN0382 | PG1513 | <i>MutT/nudix family protein</i>                                         |           |            |                        |                      |            |   |                              |         |           |            |                        |                      |           |     |
| PG1731  |        | 6 E-1                                                                    | 4.3       | 5.5        | -0.3624                | 3.2896               | Y          | ● | ●                            | Y       | 4.57 E-2  | 1.51 E+6   | 3.28 E+6               | -1.1224              | 22.1908   | Y ● |
| PGN0386 | PG1509 | <i>aroQ 3-dehydroquinatase dehydratase type II</i>                       |           |            |                        |                      |            |   |                              |         |           |            |                        |                      |           |     |
| PG1729  |        | 4.52 E-7                                                                 | 134.3     | 59.5       | 1.1749                 | 7.5987               | R          | ● | ●                            | R       | 4.63 E-9  | 1.55 E+8   | 6.93 E+7               | 1.1632               | 27.7427   | R ● |
| PGN0388 | PG1507 | <i>thiol peroxidase</i>                                                  |           |            |                        |                      |            |   |                              |         |           |            |                        |                      |           |     |
| PG1727  |        | 6.97 E-1                                                                 | 2.6       | 2.5        | 0.0381                 | 2.3411               | Y          | ● | ●                            | G       | 0         | 3.97 E+5   | 8.82 E+5               | -1.1509              | 20.2870   | Y ● |
| PGN0390 | PG1505 | <i>yitL yitL protein</i>                                                 |           |            |                        |                      |            |   |                              |         |           |            |                        |                      |           |     |
| PG1726  |        | 8.61 E-4                                                                 | 37.6      | 12         | 1.6496                 | 5.6337               | R          | ● | ●                            | R       | 0         | 1.98 E+7   | 5.58 E+6               | 1.8301               | 24.5985   | R ● |
| PGN0391 | PG1504 | <i>PDZ domain protein</i>                                                |           |            |                        |                      |            |   |                              |         |           |            |                        |                      |           |     |

| TIGR    |        | PP PPC / Pg Spectral Count                               |           |            |                        |                      |            | PP PPC/ Pg Protein Intensity |           |            |                        |                      |           | 33277 |
|---------|--------|----------------------------------------------------------|-----------|------------|------------------------|----------------------|------------|------------------------------|-----------|------------|------------------------|----------------------|-----------|-------|
| PGN     | LANL   | q-value                                                  | PP (Norm) | PPC (Norm) | log <sub>2</sub> Ratio | log <sub>2</sub> Sum | Regulation | q-value                      | PP (Norm) | PPC (Norm) | log <sub>2</sub> Ratio | log <sub>2</sub> Sum | Consensus |       |
| PG1724  |        | 2.6 E-2                                                  | 5.1       | 17         | -1.7274                | 4.4682               | Y ● ● G    | 4.52 E-5                     | 1.21 E+6  | 5.03 E+6   | -2.0604                | 22.5733              | G ●       |       |
| PGN0393 | PG1502 | <i>gcp O-sialoglycoprotein endopeptidase</i>             |           |            |                        |                      |            |                              |           |            |                        |                      |           |       |
| PG1723  |        | 2.67 E-7                                                 | 3.4       | 35.5       | -3.3747                | 5.2825               | G ● ● G    | 2.25 E-9                     | 2.78 E+6  | 1.41 E+7   | -2.3388                | 24.0072              | G ●       |       |
| PGN0394 | PG1501 | <i>rpsT ribosomal protein S20</i>                        |           |            |                        |                      |            |                              |           |            |                        |                      |           |       |
| PG1721  |        | 6.69 E-1                                                 | 24.8      | 23.5       | 0.0785                 | 5.5944               | Y ● ● Y    | 2.97 E-3                     | 1.05 E+7  | 6.29 E+6   | 0.7359                 | 23.9987              | Y ●       |       |
| PGN0396 | PG1499 | <i>vacB ribonuclease R</i>                               |           |            |                        |                      |            |                              |           |            |                        |                      |           |       |
| PG1720  |        | 5.43 E-1                                                 | 3.4       | 5          | -0.5468                | 3.0743               | Y ● ● Y    | 2.72 E-2                     | 1.07 E+6  | 1.76 E+6   | -0.7251                | 21.4334              | Y ●       |       |
| PGN0397 | PG1498 | <i>conserved domain protein</i>                          |           |            |                        |                      |            |                              |           |            |                        |                      |           |       |
| PG1719  |        | 3.05 E-1                                                 | 5.1       | 2          | 1.3601                 | 2.8347               | Y ● ● R    | 1.16 E-9                     | 2.25 E+6  | 5.7 E+5    | 1.9770                 | 21.4251              | R ●       |       |
| PGN0398 | PG1497 | <i>ABC transporter ATP-binding protein MsbA family</i>   |           |            |                        |                      |            |                              |           |            |                        |                      |           |       |
| PG1715  |        | 3.67 E-5                                                 | 13.7      | 48.5       | -1.8248                | 5.9586               | G ● ● G    | 1.77 E-5                     | 1.01 E+7  | 2.47 E+7   | -1.2883                | 25.0545              | G ●       |       |
| PGN0400 | PG1496 | <i>hypothetical protein PG_1715</i>                      |           |            |                        |                      |            |                              |           |            |                        |                      |           |       |
| PG1714  |        | 6.23 E-2                                                 | 6.8       | 17.5       | -1.3542                | 4.6056               | Y ● ● Y    | 3.5 E-2                      | 1.41 E+7  | 6.81 E+6   | 1.0468                 | 24.3148              | Y ●       |       |
| PGN0403 | PG1495 | <i>pdxH pyridoxamine-phosphate oxidase</i>               |           |            |                        |                      |            |                              |           |            |                        |                      |           |       |
| PG1712  |        | 6.69 E-1                                                 | 1.7       | 2          | -0.2249                | 1.8919               | Y ● ● R    | 0                            | 6.44 E+5  | 3.36 E+5   | 0.9361                 | 19.9022              | Y ●       |       |
| PGN0405 | PG1493 | <i>alpha-12-mannosidase family protein</i>               |           |            |                        |                      |            |                              |           |            |                        |                      |           |       |
| PG1711  |        | 3.5 E-1                                                  | 19.7      | 27         | -0.4562                | 5.5447               | Y ● ● Y    | 1.6 E-1                      | 6.38 E+6  | 6.7 E+6    | -0.0705                | 23.6403              | Y ●       |       |
| PGN0406 | PG1492 | <i>alpha-12-mannosidase family protein</i>               |           |            |                        |                      |            |                              |           |            |                        |                      |           |       |
| PG1705  |        | 3.82 E-1                                                 | 8.6       | 5          | 0.7751                 | 3.7609               | Y ● ● R    | 3.86 E-8                     | 3.32 E+6  | 8.3 E+5    | 2.0006                 | 21.9852              | R ●       |       |
| PGN0410 | PG1486 |                                                          |           |            |                        |                      |            |                              |           |            |                        |                      |           |       |
| PG1704  |        | 1.18 E-1                                                 | 78.7      | 57         | 0.4658                 | 7.0845               | Y ● ● R    | 9.77 E-8                     | 5.96 E+7  | 3.35 E+7   | 0.8296                 | 26.4723              | R ●       |       |
| PGN0411 | PG1485 | <i>thiol:disulfide interchange protein dsbD putative</i> |           |            |                        |                      |            |                              |           |            |                        |                      |           |       |
| PG1703  |        | 3.09 E-1                                                 | 9.4       | 5          | 0.9126                 | 3.8492               | Y ● ● Y    | 6.59 E-2                     | 3.58 E+6  | 6.52 E+6   | -0.8647                | 23.2687              | Y ●       |       |
| PGN0412 | PG1484 | <i>MazG family protein</i>                               |           |            |                        |                      |            |                              |           |            |                        |                      |           |       |
| PG1702  |        | 5.15 E-9                                                 | 118.1     | 41         | 1.5261                 | 7.3136               | R ● ● R    | 0                            | 5.42 E+7  | 1.04 E+7   | 2.3859                 | 25.9446              | R ●       |       |
| PGN0413 | PG1483 | <i>gyrB DNA gyrase B subunit</i>                         |           |            |                        |                      |            |                              |           |            |                        |                      |           |       |
| PG1701  |        | 2.17 E-2                                                 | 12.8      | 30         | -1.2249                | 5.4207               | Y ● ● Y    | 2 E-2                        | 5.36 E+6  | 7.18 E+6   | -0.4210                | 23.5804              | Y ●       |       |
| PGN0414 | PG1482 | <i>glutamine amidotransferase class II/dipeptidase</i>   |           |            |                        |                      |            |                              |           |            |                        |                      |           |       |
| PG1697  |        | 2.82 E-1                                                 | 7.7       | 3.5        | 1.1377                 | 3.4855               | Y ● ● R    | 1.03 E-6                     | 2.92 E+6  | 7.84 E+5   | 1.8957                 | 21.8197              | R ●       |       |
| PGN0415 | PG1481 | <i>type II restriction endonuclease putative</i>         |           |            |                        |                      |            |                              |           |            |                        |                      |           |       |
| PG1694  |        | 2.93 E-1                                                 | 6.8       | 3          | 1.1901                 | 3.2994               | Y ● ● R    | 1.24 E-4                     | 1.18 E+6  | 2.35 E+5   | 2.3241                 | 20.4303              | R ●       |       |
| PGN0418 | PG1479 | <i>conserved hypothetical protein</i>                    |           |            |                        |                      |            |                              |           |            |                        |                      |           |       |
| PG1693  |        | 6.69 E-1                                                 | 1.7       | 2          | -0.2249                | 1.8919               | Y ● ● G    | 0                            | 1.85 E+3  | 9 E+5      | -8.9261                | 19.7828              | G ●       |       |
| PGN0419 | PG1478 | <i>HesA/MoeB/ThiF family protein</i>                     |           |            |                        |                      |            |                              |           |            |                        |                      |           |       |

| TIGR    |        | PP PPC / Pg Spectral Count                                |           |            |                        |                      |            | PP PPC/ Pg Protein Intensity |           |            |                        |                      |           | 33277 |
|---------|--------|-----------------------------------------------------------|-----------|------------|------------------------|----------------------|------------|------------------------------|-----------|------------|------------------------|----------------------|-----------|-------|
| PGN     | LANL   | q-value                                                   | PP (Norm) | PPC (Norm) | log <sub>2</sub> Ratio | log <sub>2</sub> Sum | Regulation | q-value                      | PP (Norm) | PPC (Norm) | log <sub>2</sub> Ratio | log <sub>2</sub> Sum | Consensus |       |
| PG1692  |        | 4.84 E-1                                                  | 4.3       | 6.5        | -0.6034                | 3.4301               | Y ●● Y     | 2.01 E-1                     | 1.27 E+6  | 1.27 E+6   | -0.0059                | 21.2751              | Y ●       |       |
| PGN0420 | PG1477 | <i>ABC transporter ATP-binding protein</i>                |           |            |                        |                      |            |                              |           |            |                        |                      |           |       |
| PG1688  |        | 4.74 E-5                                                  | 24.0      | 2.5        | 3.2605                 | 4.7256               | R ●● R     | 0                            | 2.24 E+7  | 1.44 E+6   | 3.9654                 | 24.5076              | R ●       |       |
| PGN0423 | PG1474 | <i>greA transcription elongation factor GreA</i>          |           |            |                        |                      |            |                              |           |            |                        |                      |           |       |
| PG1687  |        | 3.82 E-1                                                  | 21.4      | 15.5       | 0.4648                 | 5.2052               | Y ●● Y     | 5.01 E-2                     | 2 E+7     | 1.17 E+7   | 0.7759                 | 24.9167              | Y ●       |       |
| PGN0424 | PG1473 | <i>HIT family protein</i>                                 |           |            |                        |                      |            |                              |           |            |                        |                      |           |       |
| PG1684  |        | 0                                                         | 1.7       | 66.5       | -5.2802                | 6.0919               | G ●● G     | 1.14 E-7                     | 1.85 E+3  | 1.1 E+7    | -12.5345               | 23.3884              | G ●       |       |
| PGN0426 | PG1471 | <i>hypothetical protein PG_1684</i>                       |           |            |                        |                      |            |                              |           |            |                        |                      |           |       |
| PG1683  |        | 1.13 E-1                                                  | 23.1      | 12         | 0.9450                 | 5.1335               | Y ●● R     | 1.05 E-10                    | 1.04 E+7  | 3.03 E+6   | 1.7769                 | 23.6781              | R ●       |       |
| PGN0427 | PG1470 | <i>conserved hypothetical protein</i>                     |           |            |                        |                      |            |                              |           |            |                        |                      |           |       |
| PG1682  |        | 5.89 E-1                                                  | 1.7       | 1          | 0.7751                 | 1.4390               | Y ●● R     | 0                            | 5.82 E+5  | 1 E+3      | 9.1839                 | 19.1521              | R ●       |       |
| PGN0428 | PG1469 | <i>glycosyl transferase group 1 family protein</i>        |           |            |                        |                      |            |                              |           |            |                        |                      |           |       |
| PG1681  |        | 6.42 E-1                                                  | 14.5      | 13         | 0.1621                 | 4.7838               | Y ●● Y     | 8.22 E-2                     | 4.66 E+6  | 3.59 E+6   | 0.3737                 | 22.9756              | Y ●       |       |
| PGN0429 | PG1468 | <i>glycogen debranching enzyme archaeal type putative</i> |           |            |                        |                      |            |                              |           |            |                        |                      |           |       |
|         |        | 3.05 E-1                                                  | 2.6       | 6          | -1.2249                | 3.0988               | Y ●● Y     | 9.52 E-2                     | 8.98 E+5  | 1.1 E+6    | -0.2988                | 20.9336              | Y ●       |       |
| PGN0430 |        |                                                           |           |            |                        |                      |            |                              |           |            |                        |                      |           |       |
| PG1677  |        | 8.08 E-7                                                  | 176.3     | 90         | 0.9697                 | 8.0567               | R ●● Y     | 4.49 E-2                     | 1.01 E+8  | 8.41 E+7   | 0.2660                 | 27.4651              | R ●       |       |
| PGN0433 | PG1465 | <i>pgk phosphoglycerate kinase</i>                        |           |            |                        |                      |            |                              |           |            |                        |                      |           |       |
| PG1676  |        | 1.57 E-12                                                 | 965.2     | 1321.5     | -0.4533                | 11.1590              | G ●● G     | 2.99 E-4                     | 6.21 E+8  | 8.35 E+8   | -0.4280                | 30.4391              | G ●       |       |
| PGN0434 | PG1464 | <i>pckA phosphoenolpyruvate carboxykinase (ATP)</i>       |           |            |                        |                      |            |                              |           |            |                        |                      |           |       |
| PG1667  |        | 6.57 E-3                                                  | 13.7      | 35         | -1.3542                | 5.6056               | G ●● G     | 3.41 E-6                     | 6.59 E+6  | 1.66 E+7   | -1.3349                | 24.4689              | G ●       |       |
| PGN0444 | PG1455 | <i>outer membrane efflux protein</i>                      |           |            |                        |                      |            |                              |           |            |                        |                      |           |       |
| PG1666  |        | 5.74 E-1                                                  | 4.3       | 3          | 0.5121                 | 2.8636               | Y ●● R     | 0                            | 3.09 E+6  | 2.25 E+5   | 3.7845                 | 21.6623              | R ●       |       |
| PGN0445 | PG1454 | <i>efflux transporter MFP component RND family</i>        |           |            |                        |                      |            |                              |           |            |                        |                      |           |       |
| PG1665  |        | 6.69 E-1                                                  | 1.7       | 2          | -0.2249                | 1.8919               | Y ●● G     | 1.64 E-6                     | 1.85 E+3  | 2.4 E+5    | -7.0216                | 17.8863              | G ●       |       |
| PGN0446 | PG1453 | <i>ABC transporter permease protein putative</i>          |           |            |                        |                      |            |                              |           |            |                        |                      |           |       |
| PG1663  |        | 4.23 E-1                                                  | 2.6       | 1          | 1.3601                 | 1.8347               | Y ●● R     | 0                            | 2.18 E+5  | 1 E+3      | 7.7658                 | 17.7382              | R ●       |       |
| PGN0448 | PG1451 | <i>ABC transporter ATP-binding protein</i>                |           |            |                        |                      |            |                              |           |            |                        |                      |           |       |
| PG1662  |        | 6.69 E-1                                                  | 3.4       | 3          | 0.1901                 | 2.6832               | Y ●● G     | 1.34 E-4                     | 1.74 E+6  | 3.92 E+6   | -1.1697                | 22.4342              | Y ●       |       |
| PGN0449 | PG1450 | <i>hypothetical protein PG_1662</i>                       |           |            |                        |                      |            |                              |           |            |                        |                      |           |       |
| PG1657  |        | 2.57 E-1                                                  | 38.5      | 27.5       | 0.4856                 | 6.0445               | Y ●● R     | 2.69 E-5                     | 2.37 E+7  | 1.54 E+7   | 0.6200                 | 25.2192              | R ●       |       |
| PGN0456 | PG1446 | <i>mutB methylmalonyl-CoA mutase large subunit</i>        |           |            |                        |                      |            |                              |           |            |                        |                      |           |       |
| PG1656  |        | 3 E-1                                                     | 40.2      | 30         | 0.4228                 | 6.1337               | Y ●● Y     | 2.63 E-2                     | 1.81 E+7  | 1.21 E+7   | 0.5792                 | 24.8475              | Y ●       |       |
| PGN0457 | PG1445 | <i>mutA methylmalonyl-CoA mutase small subunit</i>        |           |            |                        |                      |            |                              |           |            |                        |                      |           |       |

| TIGR    |        | PP PPC / Pg Spectral Count                        |           |            |                        |                      |            | PP PPC/ Pg Protein Intensity |  |         |           |            |                        | 33277                |           |   |
|---------|--------|---------------------------------------------------|-----------|------------|------------------------|----------------------|------------|------------------------------|--|---------|-----------|------------|------------------------|----------------------|-----------|---|
| PGN     | LANL   | q-value                                           | PP (Norm) | PPC (Norm) | log <sub>2</sub> Ratio | log <sub>2</sub> Sum | Regulation |                              |  | q-value | PP (Norm) | PPC (Norm) | log <sub>2</sub> Ratio | log <sub>2</sub> Sum | Consensus |   |
|         |        | 2.7 E-1                                           | 53.9      | 68.5       | -0.3457                | 6.9355               | Y          |                              |  | Y       | 3.41 E-3  | 3.74 E+7   | 6.38 E+7               | -0.7719              | 26.5918   | Y |
| PGN0458 |        |                                                   |           |            |                        |                      |            |                              |  |         |           |            |                        |                      |           |   |
| PG1653  |        | 7.82 E-4                                          | 48.8      | 18.5       | 1.3985                 | 6.0719               | R          |                              |  | R       | 4.18 E-5  | 2.52 E+7   | 8.59 E+6               | 1.5532               | 25.0112   | R |
| PGN0462 | PG1443 | <i>conserved hypothetical protein</i>             |           |            |                        |                      |            |                              |  |         |           |            |                        |                      |           |   |
| PG1652  |        | 2.4 E-7                                           | 15.4      | 63         | -2.0323                | 6.2928               | G          |                              |  | G       | 1.23 E-14 | 6.84 E+6   | 3.69 E+7               | -2.4309              | 25.3829   | G |
| PGN0463 | PG1442 | <i>hypothetical protein PG_1652</i>               |           |            |                        |                      |            |                              |  |         |           |            |                        |                      |           |   |
| PG1651  |        | 5.08 E-2                                          | 39.4      | 21.5       | 0.8724                 | 5.9274               | Y          |                              |  | R       | 7.12 E-14 | 2.5 E+7    | 8.85 E+6               | 1.4964               | 25.0109   | R |
| PGN0464 | PG1441 | <i>TPR domain protein</i>                         |           |            |                        |                      |            |                              |  |         |           |            |                        |                      |           |   |
| PG1648  |        | 2.82 E-1                                          | 7.7       | 3.5        | 1.1377                 | 3.4855               | Y          |                              |  | R       | 6.8 E-4   | 5.56 E+6   | 2.35 E+5               | 4.5653               | 22.4655   | R |
| PGN0465 | PG1440 | <i>RelA/SpoT family protein</i>                   |           |            |                        |                      |            |                              |  |         |           |            |                        |                      |           |   |
| PG1620  |        | 2.32 E-1                                          | 4.3       | 9.5        | -1.1509                | 3.7843               | Y          |                              |  | Y       | 1.06 E-2  | 1.05 E+6   | 6.92 E+6               | -2.7185              | 22.9263   | Y |
| PGN0470 | PG1417 | <i>carboxyl-terminal protease-related protein</i> |           |            |                        |                      |            |                              |  |         |           |            |                        |                      |           |   |
| PG1621  |        | 6.69 E-1                                          | 1.7       | 1.5        | 0.1901                 | 1.6832               | Y          |                              |  | G       | 0         | 1.85 E+3   | 7.48 E+4               | -5.3377              | 16.2267   | Y |
| PGN0471 | PG1418 | <i>hypothetical protein PG_1621</i>               |           |            |                        |                      |            |                              |  |         |           |            |                        |                      |           |   |
| PG1622  |        | 3.73 E-1                                          | 24.0      | 31.5       | -0.3948                | 5.7933               | Y          |                              |  | Y       | 3.56 E-2  | 5.93 E+6   | 7.74 E+6               | -0.3841              | 23.7046   | Y |
| PGN0472 | PG1419 | <i>DNA topoisomerase IV A subunit putative</i>    |           |            |                        |                      |            |                              |  |         |           |            |                        |                      |           |   |
| PG1623  |        | 5.43 E-1                                          | 6.8       | 9          | -0.3948                | 3.9860               | Y          |                              |  | Y       | 2.41 E-3  | 8.78 E+6   | 4.3 E+6                | 1.0275               | 23.6409   | Y |
| PGN0473 | PG1420 | <i>membrane bound regulatory protein putative</i> |           |            |                        |                      |            |                              |  |         |           |            |                        |                      |           |   |
| PG1625  |        | 1.79 E-1                                          | 3.4       | 9          | -1.3948                | 3.6349               | Y          |                              |  | Y       | 3.84 E-2  | 1.29 E+6   | 1.03 E+6               | 0.3207               | 21.1470   | Y |
| PGN0476 | PG1423 | <i>hypothetical protein PG_1625</i>               |           |            |                        |                      |            |                              |  |         |           |            |                        |                      |           |   |
| PG1626  |        | 0                                                 | 2.6       | 69.5       | -4.7589                | 6.1713               | G          |                              |  | G       | 8.15 E-7  | 2.87 E+5   | 2.03 E+7               | -6.1440              | 24.2959   | G |
| PGN0477 | PG1424 | <i>hypothetical protein PG_1626</i>               |           |            |                        |                      |            |                              |  |         |           |            |                        |                      |           |   |
| PG1632  |        | 1.03 E-2                                          | 14.5      | 35         | -1.2667                | 5.6307               | Y          |                              |  | G       | 2.09 E-5  | 4.16 E+6   | 1.52 E+7               | -1.8714              | 24.2085   | G |
| PGN0483 | PG1426 | <i>galM aldose 1-epimerase</i>                    |           |            |                        |                      |            |                              |  |         |           |            |                        |                      |           |   |
| PG1633  |        | 3.71 E-2                                          | 41.9      | 22.5       | 0.8980                 | 6.0096               | Y          |                              |  | Y       | 1.46 E-1  | 2.43 E+7   | 2.99 E+7               | -0.3012              | 25.6909   | Y |
| PGN0484 | PG1427 | <i>galK galactokinase</i>                         |           |            |                        |                      |            |                              |  |         |           |            |                        |                      |           |   |
| PG1635  |        | 3.05 E-1                                          | 3.4       | 1          | 1.7751                 | 2.1449               | Y          |                              |  | R       | 0         | 6.04 E+6   | 1 E+3                  | 12.5614              | 22.5274   | R |
| PGN0486 | PG1429 | <i>hypothetical protein PG_1635</i>               |           |            |                        |                      |            |                              |  |         |           |            |                        |                      |           |   |
| PG1636  |        | 3.49 E-1                                          | 15.4      | 10         | 0.6231                 | 4.6669               | Y          |                              |  | Y       | 1.53 E-3  | 7.12 E+6   | 4.14 E+6               | 0.7808               | 23.4247   | Y |
| PGN0487 | PG1430 | <i>FtsK/SpoIIIE family protein</i>                |           |            |                        |                      |            |                              |  |         |           |            |                        |                      |           |   |
| PG1638  |        | 6.69 E-1                                          | 9.4       | 8.5        | 0.1471                 | 4.1629               | Y          |                              |  | Y       | 1.7 E-1   | 5.26 E+6   | 4.95 E+6               | 0.0856               | 23.2833   | Y |
| PGN0488 | PG1431 | <i>thioredoxin family protein</i>                 |           |            |                        |                      |            |                              |  |         |           |            |                        |                      |           |   |
| PG1641  |        | 2.25 E-1                                          | 1.7       | 5.5        | -1.6843                | 2.8503               | Y          |                              |  | G       | 8.22 E-4  | 1.39 E+5   | 4.19 E+5               | -1.5974              | 19.0897   | G |
| PGN0491 | PG1433 | <i>phosphotyrosine protein phosphatase</i>        |           |            |                        |                      |            |                              |  |         |           |            |                        |                      |           |   |

| TIGR    |        | PP PPC / Pg Spectral Count                                |           |            |                        |                      |            | PP PPC/ Pg Protein Intensity |  |         |           |            |                        | 33277                |           |   |
|---------|--------|-----------------------------------------------------------|-----------|------------|------------------------|----------------------|------------|------------------------------|--|---------|-----------|------------|------------------------|----------------------|-----------|---|
| PGN     | LANL   | q-value                                                   | PP (Norm) | PPC (Norm) | log <sub>2</sub> Ratio | log <sub>2</sub> Sum | Regulation |                              |  | q-value | PP (Norm) | PPC (Norm) | log <sub>2</sub> Ratio | log <sub>2</sub> Sum | Consensus |   |
|         |        | 4.76 E-2                                                  | 8.6       | 1.5        | 2.5121                 | 3.3301               | Y          |                              |  | R       | 4 E-4     | 1.71 E+6   | 1.39 E+5               | 3.6226               | 20.8158   | R |
| PGN0493 |        |                                                           |           |            |                        |                      |            |                              |  |         |           |            |                        |                      |           |   |
| PG1616  |        | 5.89 E-1                                                  | 1.7       | 1          | 0.7751                 | 1.4390               | Y          |                              |  | R       | 0         | 5.02 E+5   | 1 E+3                  | 8.9711               | 18.9397   | R |
| PGN0496 | PG1414 | <i>conserved hypothetical protein</i>                     |           |            |                        |                      |            |                              |  |         |           |            |                        |                      |           |   |
| PG1615  |        | 1.57 E-1                                                  | 121.5     | 96.5       | 0.3324                 | 7.7682               | Y          |                              |  | Y       | 1.78 E-1  | 7.65 E+7   | 7.82 E+7               | -0.0313              | 27.2056   | Y |
| PGN0497 | PG1413 | <i>frdA fumarate reductase flavoprotein subunit</i>       |           |            |                        |                      |            |                              |  |         |           |            |                        |                      |           |   |
| PG1614  |        | 6.69 E-1                                                  | 41.1      | 39.5       | 0.0563                 | 6.3322               | Y          |                              |  | Y       | 4.54 E-2  | 3.73 E+7   | 5.12 E+7               | -0.4578              | 26.3989   | Y |
| PGN0498 | PG1412 | <i>frdB fumarate reductase iron-sulfur protein</i>        |           |            |                        |                      |            |                              |  |         |           |            |                        |                      |           |   |
| PG1613  |        | 3.93 E-1                                                  | 129.2     | 114.5      | 0.1743                 | 7.9290               | Y          |                              |  | R       | 4.83 E-4  | 6.69 E+7   | 3.96 E+7               | 0.7560               | 26.6669   | R |
| PGN0499 | PG1411 | <i>glyoxalase family protein</i>                          |           |            |                        |                      |            |                              |  |         |           |            |                        |                      |           |   |
| PG1612  |        | 1.47 E-6                                                  | 241.3     | 140        | 0.7854                 | 8.5748               | R          |                              |  | R       | 0         | 2.94 E+8   | 9.57 E+7               | 1.6211               | 28.5397   | R |
| PGN0500 | PG1409 | <i>mmdA methylmalonyl-CoA decarboxylase alpha subunit</i> |           |            |                        |                      |            |                              |  |         |           |            |                        |                      |           |   |
| PG1611  |        | 3.84 E-4                                                  | 35.1      | 9.5        | 1.8847                 | 5.4784               | R          |                              |  | R       | 0         | 2.17 E+7   | 4.35 E+6               | 2.3184               | 24.6351   | R |
| PGN0501 | PG1408 | <i>hypothetical protein PG_1611</i>                       |           |            |                        |                      |            |                              |  |         |           |            |                        |                      |           |   |
| PG1610  |        | 9.44 E-2                                                  | 6.0       | 1          | 2.5825                 | 2.8052               | Y          |                              |  | R       | 4.3 E-7   | 3.63 E+6   | 1 E+3                  | 11.8252              | 21.7914   | R |
| PGN0502 |        | <i>hypothetical protein PG_1610</i>                       |           |            |                        |                      |            |                              |  |         |           |            |                        |                      |           |   |
| PG1609  |        | 8.35 E-3                                                  | 68.5      | 37.5       | 0.8682                 | 6.7273               | R          |                              |  | R       | 1.16 E-7  | 1.3 E+8    | 1.57 E+7               | 3.0440               | 27.1167   | R |
| PGN0503 | PG1407 | <i>mmdC methylmalonyl-CoA decarboxylase gamma subunit</i> |           |            |                        |                      |            |                              |  |         |           |            |                        |                      |           |   |
| PG1608  |        | 6.85 E-1                                                  | 4.3       | 4.5        | -0.0729                | 3.1339               | Y          |                              |  | Y       | 2.02 E-2  | 9.43 E+5   | 2.32 E+6               | -1.2998              | 21.6379   | Y |
| PGN0504 | PG1406 | <i>mmdB methylmalonyl-CoA decarboxylase beta subunit</i>  |           |            |                        |                      |            |                              |  |         |           |            |                        |                      |           |   |
| PG1605  |        | 1.91 E-1                                                  | 104.4     | 83         | 0.3308                 | 7.5499               | Y          |                              |  | Y       | 9.88 E-2  | 9.36 E+7   | 1.07 E+8               | -0.1890              | 27.5782   | Y |
| PGN0508 | PG1404 | <i>pepC aminopeptidase C</i>                              |           |            |                        |                      |            |                              |  |         |           |            |                        |                      |           |   |
| PG1604  |        | 3.53 E-3                                                  | 12.0      | 34         | -1.5050                | 5.5229               | G          |                              |  | Y       | 1.11 E-1  | 1.79 E+7   | 1.32 E+7               | 0.4329               | 24.8903   | Y |
| PGN0509 | PG1403 | <i>immunoreactive 84 kDa antigen PG93</i>                 |           |            |                        |                      |            |                              |  |         |           |            |                        |                      |           |   |
| PG1603  |        | 6.03 E-1                                                  | 17.1      | 15         | 0.1901                 | 5.0051               | Y          |                              |  | Y       | 7.26 E-2  | 6.73 E+6   | 5.46 E+6               | 0.3021               | 23.5382   | Y |
| PGN0510 | PG1402 | <i>HAM1 protein</i>                                       |           |            |                        |                      |            |                              |  |         |           |            |                        |                      |           |   |
| PG1602  |        | 4.4 E-1                                                   | 1.7       | 3.5        | -1.0323                | 2.3816               | Y          |                              |  | Y       | 3.83 E-3  | 1.85 E+3   | 1.47 E+6               | -9.6336              | 20.4891   | Y |
| PGN0511 | PG1401 | <i>conserved hypothetical protein</i>                     |           |            |                        |                      |            |                              |  |         |           |            |                        |                      |           |   |
| PG1601  |        | 3.6 E-1                                                   | 2.6       | 5.5        | -1.0994                | 3.0120               | Y          |                              |  | Y       | 8.33 E-3  | 2.02 E+5   | 1.96 E+6               | -3.2761              | 21.0421   | Y |
| PGN0512 | PG1400 | <i>biotin--acetyl-CoA-carboxylase ligase</i>              |           |            |                        |                      |            |                              |  |         |           |            |                        |                      |           |   |
| PG1597  |        | 6 E-1                                                     | 16.3      | 18.5       | -0.1864                | 5.1192               | Y          |                              |  | Y       | 2.03 E-2  | 1.99 E+7   | 1.13 E+7               | 0.8103               | 24.8942   | Y |
| PGN0516 | PG1396 | <i>DnaK suppressor protein putative</i>                   |           |            |                        |                      |            |                              |  |         |           |            |                        |                      |           |   |
| PG1596  |        | 2.31 E-15                                                 | 150.6     | 40         | 1.9126                 | 7.5744               | R          |                              |  | R       | 0         | 7.62 E+7   | 1.73 E+7               | 2.1416               | 26.4787   | R |
| PGN0517 | PG1395 | <i>isoleucyl-tRNA synthetase putative</i>                 |           |            |                        |                      |            |                              |  |         |           |            |                        |                      |           |   |

| TIGR    |        | PP PPC / Pg Spectral Count                                   |           |            |                        |                      |            | PP PPC/ Pg Protein Intensity |  |         |           |            |                        | 33277                |           |   |
|---------|--------|--------------------------------------------------------------|-----------|------------|------------------------|----------------------|------------|------------------------------|--|---------|-----------|------------|------------------------|----------------------|-----------|---|
| PGN     | LANL   | q-value                                                      | PP (Norm) | PPC (Norm) | log <sub>2</sub> Ratio | log <sub>2</sub> Sum | Regulation |                              |  | q-value | PP (Norm) | PPC (Norm) | log <sub>2</sub> Ratio | log <sub>2</sub> Sum | Consensus |   |
| PG1595  |        | 9.45 E-12                                                    | 29.9      | 113.5      | -1.9222                | 7.1644               | G          |                              |  | G       | 1.29 E-11 | 2.8 E+6    | 7.15 E+6               | -1.3549              | 23.2464   | G |
| PGN0518 | PG1394 | <i>rpe ribulose-phosphate 3-epimerase</i>                    |           |            |                        |                      |            |                              |  |         |           |            |                        |                      |           |   |
| PG1592  |        | 4.53 E-1                                                     | 9.4       | 13         | -0.4659                | 4.4862               | Y          |                              |  | Y       | 3.4 E-2   | 4.31 E+6   | 3.32 E+6               | 0.3779               | 22.8627   | Y |
| PGN0521 | PG1391 | <i>HDIG domain protein</i>                                   |           |            |                        |                      |            |                              |  |         |           |            |                        |                      |           |   |
| PG1589  |        | 6 E-1                                                        | 4.3       | 5.5        | -0.3624                | 3.2896               | Y          |                              |  | Y       | 3.81 E-2  | 2.18 E+6   | 3.72 E+6               | -0.7715              | 22.4936   | Y |
| PGN0522 | PG1389 | <i>folP dihydropteroate synthase</i>                         |           |            |                        |                      |            |                              |  |         |           |            |                        |                      |           |   |
| PG1587  |        | 6.69 E-1                                                     | 6.0       | 5.5        | 0.1230                 | 3.5223               | Y          |                              |  | Y       | 1.26 E-2  | 3.11 E+5   | 4.18 E+5               | -0.4276              | 19.4761   | Y |
| PGN0524 | PG1387 | <i>PAP2 superfamily protein</i>                              |           |            |                        |                      |            |                              |  |         |           |            |                        |                      |           |   |
| PG1586  |        | 6.69 E-1                                                     | 1.7       | 1.5        | 0.1901                 | 1.6832               | Y          |                              |  | G       | 0         | 1.85 E+3   | 7.26 E+5               | -8.6159              | 19.4733   | Y |
| PGN0525 | PG1386 | <i>batE batE protein</i>                                     |           |            |                        |                      |            |                              |  |         |           |            |                        |                      |           |   |
| PG1585  |        | 6.7 E-1                                                      | 5.1       | 5.5        | -0.0994                | 3.4106               | Y          |                              |  | Y       | 8.05 E-3  | 9.87 E+5   | 2.77 E+6               | -1.4919              | 21.8428   | Y |
| PGN0526 | PG1385 | <i>batD batD protein</i>                                     |           |            |                        |                      |            |                              |  |         |           |            |                        |                      |           |   |
| PG1584  |        | 1.06 E-1                                                     | 6.8       | 1.5        | 2.1901                 | 3.0610               | Y          |                              |  | R       | 5.87 E-11 | 3.32 E+6   | 4.43 E+5               | 2.9045               | 21.8419   | R |
| PGN0527 | PG1384 | <i>batC batC protein</i>                                     |           |            |                        |                      |            |                              |  |         |           |            |                        |                      |           |   |
| PG1582  |        | 4.23 E-1                                                     | 2.6       | 1          | 1.3601                 | 1.8347               | Y          |                              |  | R       | 0         | 1.17 E+6   | 1 E+3                  | 10.1967              | 20.1637   | R |
| PGN0529 | PG1382 | <i>batA batA protein</i>                                     |           |            |                        |                      |            |                              |  |         |           |            |                        |                      |           |   |
| PG1581  |        | 2.93 E-1                                                     | 6.8       | 3          | 1.1901                 | 3.2994               | Y          |                              |  | Y       | 1.43 E-1  | 3.2 E+6    | 2.44 E+6               | 0.3905               | 22.4267   | Y |
| PGN0530 | PG1381 | <i>hypothetical protein PG_1581</i>                          |           |            |                        |                      |            |                              |  |         |           |            |                        |                      |           |   |
| PG1580  |        | 2.99 E-1                                                     | 16.3      | 10         | 0.7011                 | 4.7147               | Y          |                              |  | R       | 1.55 E-5  | 2.11 E+6   | 7.91 E+5               | 1.4184               | 21.4694   | R |
| PGN0531 | PG1380 | <i>conserved hypothetical protein</i>                        |           |            |                        |                      |            |                              |  |         |           |            |                        |                      |           |   |
| PG1579  |        | 4.08 E-3                                                     | 38.5      | 15         | 1.3601                 | 5.7416               | R          |                              |  | R       | 9.22 E-8  | 2.25 E+7   | 1.12 E+7               | 1.0072               | 25.0038   | R |
| PGN0532 | PG1379 | <i>ATPase MoxR family</i>                                    |           |            |                        |                      |            |                              |  |         |           |            |                        |                      |           |   |
| PG1578  |        | 2.01 E-2                                                     | 8.6       | 23.5       | -1.4576                | 5.0025               | Y          |                              |  | G       | 1.15 E-5  | 1.84 E+6   | 5.62 E+6               | -1.6112              | 22.8301   | G |
| PGN0533 | PG1378 | <i>nadA quinolinate synthetase complex subunit A</i>         |           |            |                        |                      |            |                              |  |         |           |            |                        |                      |           |   |
| PG1577  |        | 5.8 E-4                                                      | 2.6       | 19.5       | -2.9253                | 4.4638               | G          |                              |  | G       | 4.51 E-6  | 1.35 E+6   | 1.21 E+7               | -3.1670              | 23.6795   | G |
| PGN0534 | PG1377 | <i>nadC nicotinate-nucleotide pyrophosphorylase</i>          |           |            |                        |                      |            |                              |  |         |           |            |                        |                      |           |   |
| PG1576  |        | 7.06 E-1                                                     | 6.0       | 6          | -0.0025                | 3.5837               | Y          |                              |  | Y       | 1.58 E-1  | 7.12 E+5   | 9.2 E+5                | -0.3685              | 20.6381   | Y |
| PGN0535 | PG1376 | <i>nadB L-aspartate oxidase</i>                              |           |            |                        |                      |            |                              |  |         |           |            |                        |                      |           |   |
| PG1573  |        | 7.56 E-2                                                     | 1.7       | 8          | -2.2249                | 3.2797               | Y          |                              |  | G       | 9.68 E-8  | 1.85 E+3   | 8.36 E+5               | -8.8202              | 19.6771   | G |
| PGN0537 | PG1375 | <i>transcriptional regulator Crp family</i>                  |           |            |                        |                      |            |                              |  |         |           |            |                        |                      |           |   |
| PG1566  |        | 3.83 E-2                                                     | 50.5      | 29         | 0.7998                 | 6.3126               | Y          |                              |  | R       | 2.71 E-12 | 2.23 E+7   | 8.44 E+6               | 1.4018               | 24.8737   | R |
| PGN0543 | PG1371 | <i>gltX glutamyl-tRNA synthetase</i>                         |           |            |                        |                      |            |                              |  |         |           |            |                        |                      |           |   |
| PG1565  |        | 6.69 E-1                                                     | 12.0      | 13         | -0.1180                | 4.6427               | Y          |                              |  | R       | 5.17 E-8  | 5.91 E+6   | 7.88 E+5               | 2.9069               | 22.6753   | Y |
| PGN0544 | PG1370 | <i>3-deoxy-D-manno-octulosonic-acid transferase putative</i> |           |            |                        |                      |            |                              |  |         |           |            |                        |                      |           |   |



| TIGR    |        | PP PPC / Pg Spectral Count                                                       |           |            |                        |                      |            | PP PPC/ Pg Protein Intensity |   |         |           |            |                        | 33277                |           |     |
|---------|--------|----------------------------------------------------------------------------------|-----------|------------|------------------------|----------------------|------------|------------------------------|---|---------|-----------|------------|------------------------|----------------------|-----------|-----|
| PGN     | LANL   | q-value                                                                          | PP (Norm) | PPC (Norm) | log <sub>2</sub> Ratio | log <sub>2</sub> Sum | Regulation |                              |   | q-value | PP (Norm) | PPC (Norm) | log <sub>2</sub> Ratio | log <sub>2</sub> Sum | Consensus |     |
| PG1564  |        | 6.97 E-1                                                                         | 2.6       | 2.5        | 0.0381                 | 2.3411               | Y          | ●                            | ● | Y       | 1.62 E-1  | 3.13 E+5   | 3.51 E+5               | -0.1682              | 19.3410   | Y ● |
| PGN0545 | PG1369 | <i>membrane protein putative</i>                                                 |           |            |                        |                      |            |                              |   |         |           |            |                        |                      |           |     |
| PG1563  |        | 3.82 E-1                                                                         | 21.4      | 15.5       | 0.4648                 | 5.2052               | Y          | ●                            | ● | Y       | 6.32 E-2  | 8.32 E+6   | 1.04 E+7               | -0.3228              | 24.1585   | Y ● |
| PGN0546 | PG1368 | <i>rfa glucose-1-phosphate thymidyltransferase</i>                               |           |            |                        |                      |            |                              |   |         |           |            |                        |                      |           |     |
| PG1562  |        | 3.05 E-1                                                                         | 15.4      | 9.5        | 0.6971                 | 4.6382               | Y          | ●                            | ● | Y       | 1.99 E-1  | 4.25 E+6   | 4.22 E+6               | 0.0085               | 23.0145   | Y ● |
| PGN0547 | PG1367 | <i>rfaC dTDP-4-dehydrorhamnose 35-epimerase</i>                                  |           |            |                        |                      |            |                              |   |         |           |            |                        |                      |           |     |
| PG1561  |        | 6.69 E-1                                                                         | 8.6       | 8          | 0.0970                 | 4.0493               | Y          | ●                            | ● | Y       | 5.24 E-2  | 2.78 E+6   | 4.19 E+6               | -0.5921              | 22.7327   | Y ● |
| PGN0548 | PG1366 | <i>rfaD dTDP-4-dehydrorhamnose reductase</i>                                     |           |            |                        |                      |            |                              |   |         |           |            |                        |                      |           |     |
| PG1560  |        | 1.98 E-1                                                                         | 11.1      | 5          | 1.1536                 | 4.0111               | Y          | ●                            | ● | R       | 4.83 E-11 | 5.51 E+6   | 1.3 E+6                | 2.0823               | 22.7002   | R ● |
| PGN0549 | PG1365 | <i>rfaB dTDP-glucose 46-dehydratase</i>                                          |           |            |                        |                      |            |                              |   |         |           |            |                        |                      |           |     |
| PG1559  |        | 6.64 E-1                                                                         | 181.4     | 177        | 0.0354                 | 8.4854               | Y          | ●                            | ● | Y       | 4.14 E-2  | 1.58 E+8   | 1.35 E+8               | 0.2189               | 28.1258   | Y ● |
| PGN0550 | PG1364 | <i>gcvT glycine cleavage system T protein</i>                                    |           |            |                        |                      |            |                              |   |         |           |            |                        |                      |           |     |
| PG1555  |        | 9.55 E-3                                                                         | 10.3      | 1          | 3.3601                 | 3.4941               | Y          | ●                            | ● | R       | 0         | 9.92 E+5   | 1 E+3                  | 9.9547               | 19.9219   | R ● |
| PGN0554 | PG1361 | <i>conserved domain protein</i>                                                  |           |            |                        |                      |            |                              |   |         |           |            |                        |                      |           |     |
| PG1553  |        | 2.28 E-9                                                                         | 96.7      | 206.5      | -1.0947                | 8.2441               | G          | ●                            | ● | Y       | 1.15 E-3  | 5.69 E+7   | 1.54 E+8               | -1.4331              | 27.6497   | G ● |
| PGN0556 | PG1359 | <i>CobN/magnesium chelatase family protein</i>                                   |           |            |                        |                      |            |                              |   |         |           |            |                        |                      |           |     |
| PG1552  |        | 2.12 E-12                                                                        | 76.2      | 196.5      | -1.3676                | 8.0909               | G          | ●                            | ● | G       | 7.85 E-5  | 2.35 E+7   | 3.88 E+7               | -0.7223              | 25.8936   | G ● |
| PGN0557 | PG1358 | <i>hmuR TonB-dependent receptor HmuR</i>                                         |           |            |                        |                      |            |                              |   |         |           |            |                        |                      |           |     |
| PG1551  |        | 1.4 E-1                                                                          | 158.3     | 191.5      | -0.2747                | 8.4504               | Y          | ●                            | ● | Y       | 2.98 E-3  | 1.26 E+8   | 2 E+8                  | -0.6689              | 28.2825   | Y ● |
| PGN0558 | PG1357 | <i>hmuY hmuY protein</i>                                                         |           |            |                        |                      |            |                              |   |         |           |            |                        |                      |           |     |
|         |        | 5.44 E-2                                                                         | 14.5      | 29.5       | -1.0201                | 5.4609               | Y          | ●                            | ● | G       | 1.65 E-6  | 3.71 E+6   | 1.17 E+7               | -1.6561              | 23.8771   | G ● |
| PGN0561 |        |                                                                                  |           |            |                        |                      |            |                              |   |         |           |            |                        |                      |           |     |
| PG1545  |        | 3.06 E-6                                                                         | 195.9     | 309.5      | -0.6595                | 8.9814               | G          | ●                            | ● | Y       | 1.24 E-1  | 2.36 E+8   | 2.61 E+8               | -0.1482              | 28.8874   | G ● |
| PGN0564 | PG1354 | <i>sodB superoxide dismutase Fe-Mn</i>                                           |           |            |                        |                      |            |                              |   |         |           |            |                        |                      |           |     |
| PG1543  |        | 1.21 E-2                                                                         | 25.7      | 9          | 1.5121                 | 5.1156               | Y          | ●                            | ● | R       | 4.83 E-7  | 9.99 E+6   | 4.43 E+6               | 1.1729               | 23.7812   | R ● |
| PGN0566 | PG1350 | <i>thioesterase family protein</i>                                               |           |            |                        |                      |            |                              |   |         |           |            |                        |                      |           |     |
| PG1542  |        | 6 E-1                                                                            | 1.7       | 2.5        | -0.5468                | 2.0743               | Y          | ●                            | ● | G       | 1.27 E-4  | 1.85 E+3   | 8.85 E+5               | -8.9009              | 19.7576   | G ● |
| PGN0567 | PG1349 | <i>prtC collagenase</i>                                                          |           |            |                        |                      |            |                              |   |         |           |            |                        |                      |           |     |
| PG1541  |        | 2.93 E-1                                                                         | 8.6       | 14.5       | -0.7610                | 4.5271               | Y          | ●                            | ● | Y       | 1.42 E-1  | 3.03 E+6   | 2.7 E+6                | 0.1617               | 22.4501   | Y ● |
| PGN0568 | PG1348 | <i>folK 2-amino-4-hydroxy-6-hydroxymethylidihydropteridine pyrophosphokinase</i> |           |            |                        |                      |            |                              |   |         |           |            |                        |                      |           |     |
| PG1540  |        | 1.63 E-1                                                                         | 35.1      | 22.5       | 0.6408                 | 5.8475               | Y          | ●                            | ● | Y       | 8.49 E-2  | 1.69 E+7   | 1.45 E+7               | 0.2145               | 24.9039   | Y ● |
| PGN0569 | PG1347 | <i>queA S-adenosylmethionine:tRNA ribosyltransferase-isomerase</i>               |           |            |                        |                      |            |                              |   |         |           |            |                        |                      |           |     |
| PG1539  |        | 3.05 E-1                                                                         | 3.4       | 1          | 1.7751                 | 2.1449               | Y          | ●                            | ● | R       | 4.74 E-9  | 8.59 E+5   | 1 E+3                  | 9.7459               | 19.7133   | R ● |
| PGN0570 | PG1346 |                                                                                  |           |            |                        |                      |            |                              |   |         |           |            |                        |                      |           |     |



| TIGR    |        | PP PPC / Pg Spectral Count                                          |           |            |                        |                      |            | PP PPC/ Pg Protein Intensity |   |         |           |            |                        | 33277                |           |     |
|---------|--------|---------------------------------------------------------------------|-----------|------------|------------------------|----------------------|------------|------------------------------|---|---------|-----------|------------|------------------------|----------------------|-----------|-----|
| PGN     | LANL   | q-value                                                             | PP (Norm) | PPC (Norm) | log <sub>2</sub> Ratio | log <sub>2</sub> Sum | Regulation |                              |   | q-value | PP (Norm) | PPC (Norm) | log <sub>2</sub> Ratio | log <sub>2</sub> Sum | Consensus |     |
| PG1536  |        | 6.97 E-1                                                            | 3.4       | 3.5        | -0.0323                | 2.7913               | Y          | ●                            | ● | Y       | 8.62 E-2  | 1.38 E+6   | 9.88 E+5               | 0.4817               | 21.1752   | Y ● |
| PGN0573 | PG1343 | <i>cell division protein FtsX putative</i>                          |           |            |                        |                      |            |                              |   |         |           |            |                        |                      |           |     |
|         |        | 4.23 E-1                                                            | 2.6       | 1          | 1.3601                 | 1.8347               | Y          | ●                            | ● | R       | 0         | 6 E+5      | 1 E+3                  | 9.2289               | 19.1971   | R ● |
| PGN0580 |        |                                                                     |           |            |                        |                      |            |                              |   |         |           |            |                        |                      |           |     |
| PG1519  |        | 1.45 E-1                                                            | 5.1       | 1          | 2.3601                 | 2.6168               | Y          | ●                            | ● | R       | 1.11 E-5  | 1.06 E+6   | 1 E+3                  | 10.0564              | 20.0235   | R ● |
| PGN0583 | PG1329 | <i>hypothetical protein PG_1519</i>                                 |           |            |                        |                      |            |                              |   |         |           |            |                        |                      |           |     |
|         |        | 3.64 E-1                                                            | 18.8      | 13         | 0.5341                 | 4.9921               | Y          | ●                            | ● | R       | 3.19 E-5  | 1.01 E+7   | 4.94 E+6               | 1.0349               | 23.8447   | R ● |
| PGN0590 |        |                                                                     |           |            |                        |                      |            |                              |   |         |           |            |                        |                      |           |     |
| PG1286  |        | 2.72 E-1                                                            | 320.9     | 288.5      | 0.1534                 | 9.2512               | Y          | ●                            | ● | Y       | 1.73 E-1  | 4.64 E+8   | 4.45 E+8               | 0.0595               | 29.7603   | Y ● |
| PGN0604 | PG1133 | <i>ftn ferritin</i>                                                 |           |            |                        |                      |            |                              |   |         |           |            |                        |                      |           |     |
| PG1285  |        | 4.4 E-1                                                             | 1.7       | 3.5        | -1.0323                | 2.3816               | Y          | ●                            | ● | G       | 1.16 E-8  | 1.85 E+3   | 3.18 E+5               | -7.4229              | 18.2850   | G ● |
| PGN0606 | PG1132 | <i>glucosamine-6-phosphate isomerase putative</i>                   |           |            |                        |                      |            |                              |   |         |           |            |                        |                      |           |     |
| PG1283  |        | 5.25 E-3                                                            | 125.8     | 181.5      | -0.5291                | 8.2634               | G          | ●                            | ● | Y       | 2.29 E-3  | 6.88 E+7   | 9.27 E+7               | -0.4302              | 27.2665   | G ● |
| PGN0607 | PG1131 | <i>conserved hypothetical protein</i>                               |           |            |                        |                      |            |                              |   |         |           |            |                        |                      |           |     |
| PG1281  |        | 3.52 E-1                                                            | 12.8      | 8          | 0.6820                 | 4.3809               | Y          | ●                            | ● | Y       | 6.91 E-2  | 4.12 E+6   | 3.33 E+6               | 0.3052               | 22.8284   | Y ● |
| PGN0609 | PG1129 | <i>hypothetical protein PG_1281</i>                                 |           |            |                        |                      |            |                              |   |         |           |            |                        |                      |           |     |
| PG1280  |        | 0                                                                   | 227.6     | 82.5       | 1.4641                 | 8.2766               | R          | ●                            | ● | R       | 0         | 2.32 E+8   | 5.83 E+7               | 1.9932               | 28.1137   | R ● |
| PGN0610 | PG1128 | <i>conserved hypothetical protein</i>                               |           |            |                        |                      |            |                              |   |         |           |            |                        |                      |           |     |
| PG1279  |        | 0                                                                   | 311.5     | 78.5       | 1.9883                 | 8.6072               | R          | ●                            | ● | R       | 0         | 1.74 E+8   | 3.19 E+7               | 2.4474               | 27.6161   | R ● |
| PGN0611 | PG1127 | <i>D-isomer specific 2-hydroxyacid dehydrogenase family protein</i> |           |            |                        |                      |            |                              |   |         |           |            |                        |                      |           |     |
| PG1278  |        | 2.1 E-10                                                            | 590.4     | 845.5      | -0.5181                | 10.4877              | G          | ●                            | ● | G       | 4.9 E-4   | 6.97 E+8   | 9.92 E+8               | -0.5090              | 30.6535   | G ● |
| PGN0612 | PG1126 | <i>serC phosphoserine aminotransferase</i>                          |           |            |                        |                      |            |                              |   |         |           |            |                        |                      |           |     |
| PG1277  |        | 3.58 E-1                                                            | 6.8       | 3.5        | 0.9677                 | 3.3709               | Y          | ●                            | ● | Y       | 6.85 E-3  | 3.9 E+6    | 2.08 E+6               | 0.9058               | 22.5114   | Y ● |
| PGN0613 | PG1125 | <i>UDP-glucose-6 dehydrogenase putative</i>                         |           |            |                        |                      |            |                              |   |         |           |            |                        |                      |           |     |
|         |        | 6.69 E-1                                                            | 1.7       | 2          | -0.2249                | 1.8919               | Y          | ●                            | ● | Y       | 1.26 E-2  | 1.85 E+3   | 3.9 E+5                | -7.7202              | 18.5807   | Y ● |
| PGN0614 |        |                                                                     |           |            |                        |                      |            |                              |   |         |           |            |                        |                      |           |     |
|         |        | 3.78 E-2                                                            | 34.2      | 17         | 1.0096                 | 5.6788               | Y          | ●                            | ● | R       | 1.35 E-10 | 7.49 E+6   | 1.6 E+6                | 2.2242               | 23.1164   | R ● |
| PGN0616 |        |                                                                     |           |            |                        |                      |            |                              |   |         |           |            |                        |                      |           |     |
| PG0571  |        | 2.28 E-2                                                            | 51.3      | 28         | 0.8746                 | 6.3100               | Y          | ●                            | ● | R       | 5.03 E-5  | 1.7 E+7    | 7.84 E+6               | 1.1132               | 24.5633   | R ● |
| PGN0618 | PG0514 | <i>asd aspartate-semialdehyde dehydrogenase</i>                     |           |            |                        |                      |            |                              |   |         |           |            |                        |                      |           |     |
| PG0573  |        | 2.22 E-1                                                            | 2.6       | 7          | -1.4473                | 3.2581               | Y          | ●                            | ● | Y       | 3.28 E-2  | 1.88 E+6   | 1.52 E+6               | 0.3058               | 21.6972   | Y ● |
| PGN0620 | PG0515 | <i>mraW S-adenosyl-methyltransferase MraW</i>                       |           |            |                        |                      |            |                              |   |         |           |            |                        |                      |           |     |
| PG0575  |        | 2.15 E-1                                                            | 4.3       | 1          | 2.0970                 | 2.4001               | Y          | ●                            | ● | R       | 1.22 E-11 | 9.61 E+5   | 1 E+3                  | 9.9082               | 19.8755   | R ● |
| PGN0622 | PG0517 | <i>penicillin-binding protein 2 putative</i>                        |           |            |                        |                      |            |                              |   |         |           |            |                        |                      |           |     |

| TIGR    |        | PP PPC / Pg Spectral Count                                                                                                      |           |            |                        |                      |            | PP PPC/ Pg Protein Intensity |   |         |           |            |                        | 33277                |           |     |
|---------|--------|---------------------------------------------------------------------------------------------------------------------------------|-----------|------------|------------------------|----------------------|------------|------------------------------|---|---------|-----------|------------|------------------------|----------------------|-----------|-----|
| PGN     | LANL   | q-value                                                                                                                         | PP (Norm) | PPC (Norm) | log <sub>2</sub> Ratio | log <sub>2</sub> Sum | Regulation |                              |   | q-value | PP (Norm) | PPC (Norm) | log <sub>2</sub> Ratio | log <sub>2</sub> Sum | Consensus |     |
| PG0576  |        | 1.03 E-1                                                                                                                        | 6.8       | 16         | -1.2249                | 4.5138               | Y          | ●                            | ● | Y       | 1.47 E-3  | 2.36 E+6   | 5.79 E+6               | -1.2979              | 22.9581   | Y ● |
| PGN0623 | PG0518 | <i>murE UDP-N-acetylmuramoylalanyl-D-glutamyl-2 6-diaminopimelate ligase</i>                                                    |           |            |                        |                      |            |                              |   |         |           |            |                        |                      |           |     |
| PG0577  |        | 5.17 E-1                                                                                                                        | 1.7       | 3          | -0.8099                | 2.2361               | Y          | ●                            | ● | G       | 9.22 E-8  | 1.85 E+3   | 8.75 E+5               | -8.8851              | 19.7419   | G ● |
| PGN0624 | PG0519 | <i>mraY phospho-N-acetylmuramoyl-pentapeptide-transferase</i>                                                                   |           |            |                        |                      |            |                              |   |         |           |            |                        |                      |           |     |
| PG0578  |        | 4.53 E-1                                                                                                                        | 10.3      | 14         | -0.4473                | 4.6010               | Y          | ●                            | ● | Y       | 2.2 E-3   | 1.64 E+7   | 2.56 E+6               | 2.6837               | 24.1788   | Y ● |
| PGN0625 | PG0520 | <i>murD UDP-N-acetylmuramoylalanine--D-glutamate ligase</i>                                                                     |           |            |                        |                      |            |                              |   |         |           |            |                        |                      |           |     |
| PG0580  |        | 8.52 E-2                                                                                                                        | 3.4       | 11         | -1.6843                | 3.8503               | Y          | ●                            | ● | G       | 8.6 E-4   | 6.77 E+5   | 2.25 E+6               | -1.7307              | 21.4796   | G ● |
| PGN0627 | PG0522 | <i>murG UDP-N-acetylglucosamine--N-acetylmuramyl-(pentapeptide) pyrophosphoryl-undecaprenol N-acetylglucosamine transferase</i> |           |            |                        |                      |            |                              |   |         |           |            |                        |                      |           |     |
| PG0581  |        | 2.15 E-1                                                                                                                        | 13.7      | 7          | 0.9677                 | 4.3709               | Y          | ●                            | ● | R       | 3.84 E-4  | 7.11 E+6   | 2.76 E+6               | 1.3653               | 23.2345   | R ● |
| PGN0628 | PG0523 | <i>murC UDP-N-acetylmuramate--alanine ligase</i>                                                                                |           |            |                        |                      |            |                              |   |         |           |            |                        |                      |           |     |
| PG0583  |        | 8.63 E-2                                                                                                                        | 47.9      | 30         | 0.6756                 | 6.2839               | Y          | ●                            | ● | Y       | 2.78 E-2  | 1.5 E+7    | 1.13 E+7               | 0.4144               | 24.6490   | Y ● |
| PGN0630 | PG0525 | <i>ftsA cell division protein FtsA</i>                                                                                          |           |            |                        |                      |            |                              |   |         |           |            |                        |                      |           |     |
| PG0584  |        | 4.23 E-1                                                                                                                        | 19.7      | 25.5       | -0.3738                | 5.4976               | Y          | ●                            | ● | Y       | 1.53 E-1  | 1.09 E+7   | 1.16 E+7               | -0.0845              | 24.4208   | Y ● |
| PGN0631 | PG0526 | <i>ftsZ cell division protein FtsZ</i>                                                                                          |           |            |                        |                      |            |                              |   |         |           |            |                        |                      |           |     |
| PG0585  |        | 6.69 E-1                                                                                                                        | 7.7       | 8.5        | -0.1424                | 4.0180               | Y          | ●                            | ● | Y       | 1.11 E-1  | 4.89 E+6   | 4.23 E+6               | 0.2114               | 23.1202   | Y ● |
| PGN0632 | PG0527 | <i>YqeY family protein</i>                                                                                                      |           |            |                        |                      |            |                              |   |         |           |            |                        |                      |           |     |
| PG0588  |        | 4.92 E-1                                                                                                                        | 9.4       | 12.5       | -0.4093                | 4.4537               | Y          | ●                            | ● | Y       | 5.98 E-2  | 6.53 E+6   | 1.02 E+7               | -0.6379              | 23.9934   | Y ● |
| PGN0634 | PG0530 | <i>panB 3-methyl-2-oxobutanoate hydroxymethyltransferase</i>                                                                    |           |            |                        |                      |            |                              |   |         |           |            |                        |                      |           |     |
| PG0589  |        | 2.19 E-5                                                                                                                        | 82.1      | 33         | 1.3157                 | 6.8473               | R          | ●                            | ● | R       | 0         | 3.97 E+7   | 1.2 E+7                | 1.7285               | 25.6232   | R ● |
| PGN0635 | PG0531 | <i>guaA GMP synthase</i>                                                                                                        |           |            |                        |                      |            |                              |   |         |           |            |                        |                      |           |     |
| PG0592  |        | 8.11 E-5                                                                                                                        | 32.5      | 6.5        | 2.3226                 | 5.2859               | R          | ●                            | ● | R       | 3.06 E-13 | 2.44 E+7   | 4.06 E+6               | 2.5866               | 24.7601   | R ● |
| PGN0636 | PG0534 | <i>rpmE ribosomal protein L31</i>                                                                                               |           |            |                        |                      |            |                              |   |         |           |            |                        |                      |           |     |
| PG0593  |        | 3.9 E-1                                                                                                                         | 61.6      | 51.5       | 0.2585                 | 6.8215               | Y          | ●                            | ● | Y       | 3 E-2     | 3.75 E+7   | 2.38 E+7               | 0.6600               | 25.8696   | Y ● |
| PGN0637 | PG0535 | <i>htrA htrA protein</i>                                                                                                        |           |            |                        |                      |            |                              |   |         |           |            |                        |                      |           |     |
| PG0594  |        | 2.32 E-4                                                                                                                        | 19.7      | 2          | 3.2987                 | 4.4383               | R          | ●                            | ● | R       | 6.99 E-7  | 3.79 E+6   | 7.37 E+5               | 2.3648               | 22.1116   | R ● |
| PGN0638 | PG0536 | <i>rpoD RNA polymerase sigma-70 factor</i>                                                                                      |           |            |                        |                      |            |                              |   |         |           |            |                        |                      |           |     |
| PG0595  |        | 5.73 E-11                                                                                                                       | 53.1      | 4.5        | 3.5594                 | 5.8468               | R          | ●                            | ● | R       | 0         | 3.74 E+7   | 2.17 E+6               | 4.1047               | 25.2388   | R ● |
| PGN0639 | PG0537 | <i>rpsF ribosomal protein S6</i>                                                                                                |           |            |                        |                      |            |                              |   |         |           |            |                        |                      |           |     |
| PG0596  |        | 1.84 E-1                                                                                                                        | 49.6      | 35         | 0.5038                 | 6.4031               | Y          | ●                            | ● | Y       | 1.74 E-2  | 3.69 E+7   | 2.69 E+7               | 0.4525               | 25.9277   | Y ● |
| PGN0640 | PG0538 | <i>rpsR ribosomal protein S18</i>                                                                                               |           |            |                        |                      |            |                              |   |         |           |            |                        |                      |           |     |
| PG0597  |        | 6.23 E-9                                                                                                                        | 43.6      | 4          | 3.4475                 | 5.5740               | R          | ●                            | ● | R       | 2.09 E-8  | 3.93 E+7   | 2.62 E+6               | 3.9081               | 25.3224   | R ● |
| PGN0641 | PG0540 | <i>rplI ribosomal protein L9</i>                                                                                                |           |            |                        |                      |            |                              |   |         |           |            |                        |                      |           |     |
| PG0598  |        | 6.69 E-1                                                                                                                        | 1.7       | 2          | -0.2249                | 1.8919               | Y          | ●                            | ● | R       | 0         | 4.96 E+5   | 2.29 E+5               | 1.1164               | 19.4670   | Y ● |
| PGN0642 | PG0541 | <i>hypothetical protein PG_0598</i>                                                                                             |           |            |                        |                      |            |                              |   |         |           |            |                        |                      |           |     |

| TIGR    |        | PP PPC / Pg Spectral Count                                                      |           |            |                        |                      |            | PP PPC/ Pg Protein Intensity |  |         |           |            |                        | 33277                |           |   |
|---------|--------|---------------------------------------------------------------------------------|-----------|------------|------------------------|----------------------|------------|------------------------------|--|---------|-----------|------------|------------------------|----------------------|-----------|---|
| PGN     | LANL   | q-value                                                                         | PP (Norm) | PPC (Norm) | log <sub>2</sub> Ratio | log <sub>2</sub> Sum | Regulation |                              |  | q-value | PP (Norm) | PPC (Norm) | log <sub>2</sub> Ratio | log <sub>2</sub> Sum | Consensus |   |
| PG0599  |        | 4.65 E-1                                                                        | 76.2      | 85.5       | -0.1670                | 7.3368               | Y          |                              |  | Y       | 5.19 E-2  | 5.44 E+7   | 7.06 E+7               | -0.3765              | 26.8969   | Y |
| PGN0643 | PG0542 | <i>ribBA 34-dihydroxy-2-butanone 4-phosphate synthase/GTP cyclohydrolase II</i> |           |            |                        |                      |            |                              |  |         |           |            |                        |                      |           |   |
| PG0602  |        | 9.33 E-12                                                                       | 8.6       | 67.5       | -2.9798                | 6.2490               | G          |                              |  | G       | 3.63 E-13 | 2.19 E+6   | 2.26 E+7               | -3.3685              | 24.5623   | G |
| PGN0645 | PG0543 | <i>hypothetical protein PG_0602</i>                                             |           |            |                        |                      |            |                              |  |         |           |            |                        |                      |           |   |
| PG0603  |        | 9.55 E-3                                                                        | 10.3      | 1          | 3.3601                 | 3.4941               | Y          |                              |  | R       | 0         | 4.66 E+6   | 1 E+3                  | 12.1866              | 22.1527   | R |
| PGN0646 | PG0544 | <i>cmk cytidylate kinase</i>                                                    |           |            |                        |                      |            |                              |  |         |           |            |                        |                      |           |   |
| PG0604  |        | 5.17 E-1                                                                        | 1.7       | 3          | -0.8099                | 2.2361               | Y          |                              |  | G       | 7.52 E-4  | 1.85 E+3   | 3.25 E+5               | -7.4575              | 18.3194   | G |
| PGN0647 | PG0545 | <i>ispH hydroxymethylbutenyl pyrophosphate reductase</i>                        |           |            |                        |                      |            |                              |  |         |           |            |                        |                      |           |   |
| PG0611  |        | 3.82 E-1                                                                        | 53.9      | 64.5       | -0.2589                | 6.8876               | Y          |                              |  | Y       | 8.76 E-3  | 2.54 E+7   | 4.53 E+7               | -0.8364              | 26.0739   | Y |
| PGN0654 | PG0550 | <i>lipoprotein putative</i>                                                     |           |            |                        |                      |            |                              |  |         |           |            |                        |                      |           |   |
| PG0613  |        | 2.25 E-1                                                                        | 1.7       | 5.5        | -1.6843                | 2.8503               | Y          |                              |  | Y       | 1.99 E-2  | 1.85 E+3   | 1.3 E+6                | -9.4556              | 20.3114   | Y |
| PGN0656 | PG0551 | <i>hypothetical protein PG_0613</i>                                             |           |            |                        |                      |            |                              |  |         |           |            |                        |                      |           |   |
| PG0614  |        | 2.6 E-2                                                                         | 6.0       | 18.5       | -1.6270                | 4.6141               | Y          |                              |  | Y       | 1.5 E-3   | 4.76 E+6   | 1.51 E+7               | -1.6634              | 24.2411   | Y |
| PGN0657 | PG0552 | <i>hypothetical protein PG_0614</i>                                             |           |            |                        |                      |            |                              |  |         |           |            |                        |                      |           |   |
| PG0615  |        | 5.89 E-1                                                                        | 19.7      | 17         | 0.2112                 | 5.1969               | Y          |                              |  | Y       | 7.7 E-2   | 7.4 E+6    | 5.82 E+6               | 0.3454               | 23.6560   | Y |
| PGN0658 | PG0553 | <i>typA GTP-binding protein TypA</i>                                            |           |            |                        |                      |            |                              |  |         |           |            |                        |                      |           |   |
| PG0616  |        | 0                                                                               | 367.1     | 659.5      | -0.8453                | 10.0036              | G          |                              |  | Y       | 5.12 E-3  | 5.06 E+8   | 6.8 E+8                | -0.4273              | 30.1434   | G |
| PGN0659 | PG0554 | <i>thioredoxin putative</i>                                                     |           |            |                        |                      |            |                              |  |         |           |            |                        |                      |           |   |
| PG0618  |        | 1.38 E-6                                                                        | 140.3     | 66         | 1.0883                 | 7.6888               | R          |                              |  | R       | 7.42 E-6  | 1.84 E+8   | 1 E+8                  | 0.8746               | 28.0794   | R |
| PGN0660 | PG0556 | <i>alkyl hydroperoxide reductase C subunit</i>                                  |           |            |                        |                      |            |                              |  |         |           |            |                        |                      |           |   |
| PG0619  |        | 9.3 E-2                                                                         | 18.8      | 8.5        | 1.1471                 | 4.7721               | Y          |                              |  | Y       | 1.06 E-1  | 3.66 E+6   | 4.35 E+6               | -0.2499              | 22.9334   | Y |
| PGN0661 | PG0557 | <i>alkyl hydroperoxide reductase F subunit</i>                                  |           |            |                        |                      |            |                              |  |         |           |            |                        |                      |           |   |
| PG0620  |        | 1.17 E-2                                                                        | 73.6      | 42.5       | 0.7920                 | 6.8591               | Y          |                              |  | R       | 0         | 2.84 E+7   | 7.83 E+6               | 1.8616               | 25.1122   | R |
| PGN0662 | PG0558 | <i>lon ATP-dependent protease La</i>                                            |           |            |                        |                      |            |                              |  |         |           |            |                        |                      |           |   |
| PG0621  |        | 4.75 E-1                                                                        | 12.8      | 9.5        | 0.4341                 | 4.4812               | Y          |                              |  | Y       | 2.39 E-3  | 4.33 E+6   | 2.59 E+6               | 0.7412               | 22.7223   | Y |
| PGN0663 | PG0559 | <i>conserved hypothetical protein</i>                                           |           |            |                        |                      |            |                              |  |         |           |            |                        |                      |           |   |
| PG0622  |        | 3.76 E-1                                                                        | 6.0       | 3          | 0.9975                 | 3.1683               | Y          |                              |  | Y       | 1.52 E-1  | 2.08 E+6   | 1.81 E+6               | 0.1990               | 21.8943   | Y |
| PGN0664 | PG0560 | <i>hypothetical protein PG_0622</i>                                             |           |            |                        |                      |            |                              |  |         |           |            |                        |                      |           |   |
| PG0623  |        | 4.23 E-1                                                                        | 361.9     | 339.5      | 0.0923                 | 9.4542               | Y          |                              |  | G       | 2.73 E-4  | 2.01 E+8   | 3.94 E+8               | -0.9721              | 29.1476   | Y |
| PGN0665 | PG0561 | <i>tpiA triosephosphate isomerase</i>                                           |           |            |                        |                      |            |                              |  |         |           |            |                        |                      |           |   |
| PG0624  |        | 9.44 E-2                                                                        | 6.0       | 1          | 2.5825                 | 2.8052               | Y          |                              |  | R       | 0         | 1.7 E+6    | 1 E+3                  | 10.7313              | 20.6980   | R |
| PGN0666 | PG0562 | <i>hypothetical protein PG_0624</i>                                             |           |            |                        |                      |            |                              |  |         |           |            |                        |                      |           |   |
| PG0625  |        | 4.75 E-1                                                                        | 18.0      | 14         | 0.3601                 | 4.9986               | Y          |                              |  | Y       | 6.08 E-2  | 7.13 E+6   | 2.12 E+7               | -1.5689              | 24.7536   | Y |
| PGN0667 | PG0563 | <i>folE GTP cyclohydrolase I</i>                                                |           |            |                        |                      |            |                              |  |         |           |            |                        |                      |           |   |

| TIGR    |        | PP PPC / Pg Spectral Count                                                              |           |            |                        |                      |            | PP PPC/ Pg Protein Intensity |  |         |           |            |                        | 33277                |           |   |
|---------|--------|-----------------------------------------------------------------------------------------|-----------|------------|------------------------|----------------------|------------|------------------------------|--|---------|-----------|------------|------------------------|----------------------|-----------|---|
| PGN     | LANL   | q-value                                                                                 | PP (Norm) | PPC (Norm) | log <sub>2</sub> Ratio | log <sub>2</sub> Sum | Regulation |                              |  | q-value | PP (Norm) | PPC (Norm) | log <sub>2</sub> Ratio | log <sub>2</sub> Sum | Consensus |   |
| PG0627  |        | 2.4 E-1                                                                                 | 20.5      | 12.5       | 0.7162                 | 5.0460               | Y          |                              |  | R       | 1.77 E-10 | 1.8 E+7    | 6.25 E+6               | 1.5220               | 24.5291   | R |
| PGN0668 | PG0565 | <i>RNA-binding protein</i>                                                              |           |            |                        |                      |            |                              |  |         |           |            |                        |                      |           |   |
|         |        | 6.54 E-1                                                                                | 2.6       | 2          | 0.3601                 | 2.1912               | Y          |                              |  | Y       | 1.17 E-2  | 1.04 E+6   | 1.44 E+6               | -0.4646              | 21.2430   | Y |
| PGN0669 |        |                                                                                         |           |            |                        |                      |            |                              |  |         |           |            |                        |                      |           |   |
| PG0629  |        | 4.75 E-1                                                                                | 3.4       | 5.5        | -0.6843                | 3.1575               | Y          |                              |  | Y       | 1.36 E-3  | 8.6 E+5    | 3.29 E+6               | -1.9333              | 21.9834   | Y |
| PGN0670 | PG0568 | <i>ppnK ATP-NAD kinase</i>                                                              |           |            |                        |                      |            |                              |  |         |           |            |                        |                      |           |   |
| PG0630  |        | 5.99 E-2                                                                                | 32.5      | 53         | -0.7049                | 6.4181               | Y          |                              |  | Y       | 7.1 E-2   | 1.73 E+7   | 2 E+7                  | -0.2131              | 25.1515   | Y |
| PGN0671 | PG0569 | <i>pdxJ pyridoxal phosphate biosynthetic protein PdxJ</i>                               |           |            |                        |                      |            |                              |  |         |           |            |                        |                      |           |   |
| PG0631  |        | 9.84 E-2                                                                                | 17.1      | 7.5        | 1.1901                 | 4.6214               | Y          |                              |  | Y       | 1.44 E-1  | 8.39 E+6   | 7.1 E+6                | 0.2407               | 23.8844   | Y |
| PGN0672 | PG0570 | <i>MotA/ToIQ/ExbB proton channel family protein</i>                                     |           |            |                        |                      |            |                              |  |         |           |            |                        |                      |           |   |
| PG0632  |        | 1.31 E-3                                                                                | 13.7      | 1          | 3.7751                 | 3.8768               | Y          |                              |  | R       | 0         | 3.82 E+6   | 1 E+3                  | 11.8991              | 21.8653   | R |
| PGN0673 | PG0571 | <i>biopolymer transport protein ExbD putative</i>                                       |           |            |                        |                      |            |                              |  |         |           |            |                        |                      |           |   |
| PG0633  |        | 6 E-1                                                                                   | 1.7       | 2.5        | -0.5468                | 2.0743               | Y          |                              |  | G       | 2.36 E-4  | 1.85 E+3   | 9.73 E+5               | -9.0384              | 19.8948   | G |
| PGN0674 | PG0573 | <i>hypothetical protein PG_0633</i>                                                     |           |            |                        |                      |            |                              |  |         |           |            |                        |                      |           |   |
| PG0634  |        | 4.86 E-2                                                                                | 33.4      | 17         | 0.9730                 | 5.6545               | Y          |                              |  | Y       | 1.23 E-1  | 1.76 E+7   | 2.29 E+7               | -0.3833              | 25.2719   | Y |
| PGN0675 | PG0575 | <i>ThiJ/PfpI family protein</i>                                                         |           |            |                        |                      |            |                              |  |         |           |            |                        |                      |           |   |
| PG0637  |        | 3.93 E-1                                                                                | 4.3       | 7.5        | -0.8099                | 3.5581               | Y          |                              |  | G       | 8.35 E-5  | 2.4 E+5    | 4.31 E+5               | -0.8461              | 19.3544   | G |
| PGN0678 | PG0578 | <i>thiL thiamine monophosphate kinase</i>                                               |           |            |                        |                      |            |                              |  |         |           |            |                        |                      |           |   |
| PG0638  |        | 6 E-1                                                                                   | 6.8       | 5.5        | 0.3157                 | 3.6259               | Y          |                              |  | Y       | 2.71 E-3  | 3.97 E+6   | 4.36 E+5               | 3.1872               | 22.0702   | Y |
| PGN0679 | PG0579 | <i>lpxK tetraacyldisaccharide 4'-kinase</i>                                             |           |            |                        |                      |            |                              |  |         |           |            |                        |                      |           |   |
| PG0639  |        | 4.31 E-1                                                                                | 46.2      | 54.5       | -0.2382                | 6.6540               | Y          |                              |  | Y       | 2.16 E-3  | 3.08 E+7   | 4.56 E+7               | -0.5675              | 26.1865   | Y |
| PGN0680 | PG0580 | <i>sppA signal peptide peptidase SppA 67K type</i>                                      |           |            |                        |                      |            |                              |  |         |           |            |                        |                      |           |   |
|         |        | 2.4 E-2                                                                                 | 203.6     | 260        | -0.3525                | 8.8569               | Y          |                              |  | G       | 6.19 E-5  | 1.06 E+8   | 1.69 E+8               | -0.6745              | 28.0328   | G |
| PGN0683 |        |                                                                                         |           |            |                        |                      |            |                              |  |         |           |            |                        |                      |           |   |
| PG0645  |        | 3.82 E-1                                                                                | 3.4       | 6.5        | -0.9253                | 3.3107               | Y          |                              |  | Y       | 1.51 E-2  | 1.21 E+6   | 3.2 E+6                | -1.4038              | 22.0714   | Y |
| PGN0684 | PG0583 | <i>conserved domain protein</i>                                                         |           |            |                        |                      |            |                              |  |         |           |            |                        |                      |           |   |
| PG0648  |        | 4.4 E-1                                                                                 | 1.7       | 3.5        | -1.0323                | 2.3816               | Y          |                              |  | G       | 2.98 E-9  | 1.85 E+3   | 4.24 E+5               | -7.8408              | 18.7008   | G |
| PGN0687 | PG0586 | <i>iron compound ABC transporter periplasmic iron compound-binding protein putative</i> |           |            |                        |                      |            |                              |  |         |           |            |                        |                      |           |   |
| PG0651  |        | 1.84 E-1                                                                                | 1.7       | 6          | -1.8099                | 2.9470               | Y          |                              |  | G       | 9.27 E-6  | 1.85 E+3   | 1.16 E+6               | -9.2937              | 20.1497   | G |
| PGN0690 | PG0589 | <i>HDIG domain protein</i>                                                              |           |            |                        |                      |            |                              |  |         |           |            |                        |                      |           |   |
| PG0652  |        | 1.06 E-1                                                                                | 22.2      | 37         | -0.7339                | 5.8887               | Y          |                              |  | Y       | 5.24 E-2  | 4.65 E+6   | 6.28 E+6               | -0.4337              | 23.3822   | Y |
| PGN0691 | PG0590 | <i>conserved hypothetical protein</i>                                                   |           |            |                        |                      |            |                              |  |         |           |            |                        |                      |           |   |
| PG0653  |        | 7.86 E-6                                                                                | 39.4      | 7.5        | 2.3918                 | 5.5503               | R          |                              |  | R       | 5.38 E-8  | 1.05 E+7   | 4.15 E+6               | 1.3363               | 23.8017   | R |
| PGN0692 | PG0591 | <i>serB phosphoserine phosphatase</i>                                                   |           |            |                        |                      |            |                              |  |         |           |            |                        |                      |           |   |

| TIGR    |        | PP PPC / Pg Spectral Count                                         |           |            |                        |                      |            | PP PPC/ Pg Protein Intensity |  |         |           |            |                        | 33277                |           |   |
|---------|--------|--------------------------------------------------------------------|-----------|------------|------------------------|----------------------|------------|------------------------------|--|---------|-----------|------------|------------------------|----------------------|-----------|---|
| PGN     | LANL   | q-value                                                            | PP (Norm) | PPC (Norm) | log <sub>2</sub> Ratio | log <sub>2</sub> Sum | Regulation |                              |  | q-value | PP (Norm) | PPC (Norm) | log <sub>2</sub> Ratio | log <sub>2</sub> Sum | Consensus |   |
| PG0654  |        | 3.58 E-1                                                           | 33.4      | 42.5       | -0.3489                | 6.2455               | Y          |                              |  | Y       | 2.53 E-3  | 3.24 E+7   | 6.24 E+7               | -0.9451              | 26.4990   | Y |
| PGN0693 | PG0592 | <i>hypothetical protein PG_0654</i>                                |           |            |                        |                      |            |                              |  |         |           |            |                        |                      |           |   |
| PG0658  |        | 1.54 E-1                                                           | 10.3      | 19.5       | -0.9253                | 4.8957               | Y          |                              |  | G       | 4.01 E-4  | 3.94 E+6   | 1.08 E+7               | -1.4525              | 23.8123   | G |
| PGN0696 | PG0594 | <i>phosphatase Yrbl family</i>                                     |           |            |                        |                      |            |                              |  |         |           |            |                        |                      |           |   |
| PG0659  |        | 5.17 E-1                                                           | 1.7       | 3          | -0.8099                | 2.2361               | Y          |                              |  | Y       | 2.95 E-2  | 1.85 E+3   | 7.7 E+5                | -8.6999              | 19.5570   | Y |
| PGN0697 | PG0595 | <i>conserved hypothetical protein</i>                              |           |            |                        |                      |            |                              |  |         |           |            |                        |                      |           |   |
| PG0660  |        | 3.82 E-1                                                           | 1.7       | 4          | -1.2249                | 2.5138               | Y          |                              |  | G       | 2.06 E-6  | 6.51 E+5   | 2.99 E+6               | -2.2023              | 21.7978   | G |
| PGN0698 | PG0596 | <i>nitroreductase family protein</i>                               |           |            |                        |                      |            |                              |  |         |           |            |                        |                      |           |   |
| PG0664  |        | 6.27 E-1                                                           | 22.2      | 24.5       | -0.1392                | 5.5468               | Y          |                              |  | R       | 2.9 E-4   | 8.14 E+6   | 4.19 E+6               | 0.9604               | 23.5555   | Y |
| PGN0700 | PG0597 | <i>oxidoreductase Gfo/ldh/MocA family</i>                          |           |            |                        |                      |            |                              |  |         |           |            |                        |                      |           |   |
| PG0665  |        | 9.53 E-2                                                           | 7.7       | 17.5       | -1.1843                | 4.6554               | Y          |                              |  | G       | 1.36 E-4  | 8.77 E+5   | 3.74 E+6               | -2.0927              | 22.1390   | G |
| PGN0701 | PG0598 | <i>lacZ-1 beta-galactosidase</i>                                   |           |            |                        |                      |            |                              |  |         |           |            |                        |                      |           |   |
|         |        | 5.95 E-1                                                           | 6.8       | 8.5        | -0.3124                | 3.9397               | Y          |                              |  | Y       | 1.74 E-1  | 1.84 E+6   | 1.97 E+6               | -0.0991              | 21.8614   | Y |
| PGN0702 |        |                                                                    |           |            |                        |                      |            |                              |  |         |           |            |                        |                      |           |   |
|         |        | 4.75 E-1                                                           | 6.8       | 4.5        | 0.6052                 | 3.5040               | Y          |                              |  | R       | 1.29 E-4  | 2.55 E+6   | 9.46 E+5               | 1.4277               | 21.7355   | R |
| PGN0703 |        |                                                                    |           |            |                        |                      |            |                              |  |         |           |            |                        |                      |           |   |
| PG0668  |        | 0                                                                  | 261.8     | 502.5      | -0.9405                | 9.5781               | G          |                              |  | G       | 3.56 E-6  | 1.05 E+8   | 1.94 E+8               | -0.8816              | 28.1542   | G |
| PGN0704 | PG0601 | <i>TonB-dependent receptor</i>                                     |           |            |                        |                      |            |                              |  |         |           |            |                        |                      |           |   |
| PG0669  |        | 4.32 E-5                                                           | 32.5      | 79.5       | -1.2899                | 6.8075               | G          |                              |  | G       | 7.69 E-11 | 1.76 E+7   | 6.67 E+7               | -1.9187              | 26.3297   | G |
| PGN0705 | PG0602 | <i>fetB heme-binding protein FetB</i>                              |           |            |                        |                      |            |                              |  |         |           |            |                        |                      |           |   |
| PG0670  |        | 4.53 E-1                                                           | 8.6       | 12         | -0.4879                | 4.3615               | Y          |                              |  | G       | 5.33 E-4  | 3.83 E+6   | 7.16 E+6               | -0.9048              | 23.3898   | G |
| PGN0706 | PG0603 | <i>lipoprotein putative</i>                                        |           |            |                        |                      |            |                              |  |         |           |            |                        |                      |           |   |
| PG0672  |        | 6 E-1                                                              | 1.7       | 2.5        | -0.5468                | 2.0743               | Y          |                              |  | G       | 0         | 1.85 E+3   | 1.75 E+5               | -6.5627              | 17.4316   | G |
| PGN0708 | PG0605 | <i>iron compound ABC transporter ATP-binding protein</i>           |           |            |                        |                      |            |                              |  |         |           |            |                        |                      |           |   |
| PG0674  |        | 6.61 E-8                                                           | 59.9      | 12.5       | 2.2605                 | 6.1778               | R          |                              |  | R       | 0         | 6.21 E+7   | 8.06 E+6               | 2.9456               | 26.0648   | R |
| PGN0709 | PG0606 | <i>iorB indolepyruvate ferredoxin oxidoreductase beta subunit</i>  |           |            |                        |                      |            |                              |  |         |           |            |                        |                      |           |   |
| PG0675  |        | 9.88 E-4                                                           | 118.1     | 68         | 0.7962                 | 7.5398               | R          |                              |  | R       | 7.88 E-8  | 1.06 E+8   | 4.93 E+7               | 1.1068               | 27.2109   | R |
| PGN0710 | PG0607 | <i>iorA indolepyruvate ferredoxin oxidoreductase alpha subunit</i> |           |            |                        |                      |            |                              |  |         |           |            |                        |                      |           |   |
| PG0676  |        | 3.58 E-1                                                           | 33.4      | 42.5       | -0.3489                | 6.2455               | Y          |                              |  | Y       | 5.24 E-3  | 2.13 E+7   | 3.25 E+7               | -0.6108              | 25.6798   | Y |
| PGN0711 | PG0608 | <i>oxidoreductase short chain dehydrogenase/reductase family</i>   |           |            |                        |                      |            |                              |  |         |           |            |                        |                      |           |   |
| PG0677  |        | 7.02 E-6                                                           | 47.9      | 11.5       | 2.0589                 | 5.8928               | R          |                              |  | R       | 0         | 3.53 E+7   | 3.8 E+6                | 3.2134               | 25.2192   | R |
| PGN0713 | PG0609 | <i>LYS1 saccharopine dehydrogenase</i>                             |           |            |                        |                      |            |                              |  |         |           |            |                        |                      |           |   |
| PG0678  |        | 3.82 E-1                                                           | 1.7       | 4          | -1.2249                | 2.5138               | Y          |                              |  | G       | 2.74 E-6  | 1.85 E+3   | 8.31 E+5               | -8.8106              | 19.6675   | G |
| PGN0714 | PG0610 | <i>pyrazinamidase/nicotinamidase putative</i>                      |           |            |                        |                      |            |                              |  |         |           |            |                        |                      |           |   |

| TIGR    |        | PP PPC / Pg Spectral Count                                                             |           |            |                        |                      |            | PP PPC/ Pg Protein Intensity |  |         |           |            |                        | 33277                |           |   |
|---------|--------|----------------------------------------------------------------------------------------|-----------|------------|------------------------|----------------------|------------|------------------------------|--|---------|-----------|------------|------------------------|----------------------|-----------|---|
| PGN     | LANL   | q-value                                                                                | PP (Norm) | PPC (Norm) | log <sub>2</sub> Ratio | log <sub>2</sub> Sum | Regulation |                              |  | q-value | PP (Norm) | PPC (Norm) | log <sub>2</sub> Ratio | log <sub>2</sub> Sum | Consensus |   |
|         |        | 6.69 E-1                                                                               | 3.4       | 3          | 0.1901                 | 2.6832               | Y          |                              |  | R       | 2.08 E-11 | 3.46 E+6   | 1.42 E+6               | 1.2812               | 22.2181   | R |
| PGN0721 |        |                                                                                        |           |            |                        |                      |            |                              |  |         |           |            |                        |                      |           |   |
| PG0686  |        | 1.45 E-1                                                                               | 60.8      | 43         | 0.4986                 | 6.6970               | Y          |                              |  | R       | 1.63 E-8  | 2.37 E+7   | 1.14 E+7               | 1.0583               | 25.0612   | R |
| PGN0722 | PG0620 | <i>conserved hypothetical protein</i>                                                  |           |            |                        |                      |            |                              |  |         |           |            |                        |                      |           |   |
| PG0687  |        | 8.11 E-5                                                                               | 926.7     | 1123.5     | -0.2779                | 11.0015              | G          |                              |  | Y       | 3.86 E-2  | 7.79 E+8   | 6.94 E+8               | 0.1684               | 30.4560   | Y |
| PGN0723 | PG0621 | <i>sucD succinate-semialdehyde dehydrogenase</i>                                       |           |            |                        |                      |            |                              |  |         |           |            |                        |                      |           |   |
| PG0689  |        | 2.67 E-1                                                                               | 475.7     | 435.5      | 0.1275                 | 9.8317               | Y          |                              |  | Y       | 2.01 E-1  | 4.04 E+8   | 4.04 E+8               | -0.0012              | 29.5904   | Y |
| PGN0724 | PG0622 | <i>4hbD NAD-dependent 4-hydroxybutyrate dehydrogenase</i>                              |           |            |                        |                      |            |                              |  |         |           |            |                        |                      |           |   |
| PG0690  |        | 1.43 E-1                                                                               | 280.7     | 324        | -0.2072                | 9.2400               | Y          |                              |  | Y       | 1.94 E-2  | 2.12 E+8   | 2.72 E+8               | -0.3595              | 28.8498   | Y |
| PGN0725 | PG0623 | <i>abfT-1 4-hydroxybutyrate CoA-transferase</i>                                        |           |            |                        |                      |            |                              |  |         |           |            |                        |                      |           |   |
| PG0691  |        | 4.65 E-1                                                                               | 2.6       | 4.5        | -0.8099                | 2.8211               | Y          |                              |  | Y       | 1.74 E-2  | 7.31 E+5   | 1.33 E+6               | -0.8602              | 20.9721   | Y |
| PGN0726 | PG0624 | <i>NifU-related protein</i>                                                            |           |            |                        |                      |            |                              |  |         |           |            |                        |                      |           |   |
| PG0692  |        | 7.34 E-5                                                                               | 1542.7    | 1795.5     | -0.2189                | 11.7049              | G          |                              |  | Y       | 2.34 E-2  | 1.18 E+9   | 1.39 E+9               | -0.2342              | 31.2597   | G |
| PGN0727 | PG0625 | <i>abfD 4-hydroxybutyryl-CoA dehydratase</i>                                           |           |            |                        |                      |            |                              |  |         |           |            |                        |                      |           |   |
| PG0694  |        | 0                                                                                      | 363.7     | 1101.5     | -1.5988                | 10.5168              | G          |                              |  | G       | 3.7 E-4   | 5.59 E+8   | 7.66 E+8               | -0.4550              | 30.3032   | G |
| PGN0728 | PG0626 | <i>immunoreactive 42 kDa antigen PG33</i>                                              |           |            |                        |                      |            |                              |  |         |           |            |                        |                      |           |   |
| PG0695  |        | 0                                                                                      | 313.2     | 982        | -1.6488                | 10.3389              | G          |                              |  | G       | 5.77 E-5  | 4.91 E+8   | 8.23 E+8               | -0.7442              | 30.2917   | G |
| PGN0729 | PG0627 | <i>immunoreactive 43 kDa antigen PG32</i>                                              |           |            |                        |                      |            |                              |  |         |           |            |                        |                      |           |   |
| PG0698  |        | 6.05 E-2                                                                               | 6.8       | 1          | 2.7751                 | 2.9718               | Y          |                              |  | R       | 3.06 E-4  | 2.59 E+6   | 1 E+3                  | 11.3400              | 21.3063   | R |
| PGN0732 | PG0628 | <i>lipoprotein putative</i>                                                            |           |            |                        |                      |            |                              |  |         |           |            |                        |                      |           |   |
| PG0699  |        | 2.18 E-7                                                                               | 41.9      | 109.5      | -1.3850                | 7.2425               | G          |                              |  | G       | 2.75 E-10 | 1.94 E+7   | 4.72 E+7               | -1.2809              | 25.9892   | G |
| PGN0733 | PG0629 | <i>malP maltodextrin phosphorylase</i>                                                 |           |            |                        |                      |            |                              |  |         |           |            |                        |                      |           |   |
| PG0701  |        | 5.43 E-1                                                                               | 6.0       | 8          | -0.4175                | 3.8063               | Y          |                              |  | Y       | 5.81 E-2  | 1.46 E+6   | 1.21 E+6               | 0.2684               | 21.3497   | Y |
| PGN0735 | PG0631 | <i>cobU cobinamide kinase/cobinamide phosphate guanylyltransferase</i>                 |           |            |                        |                      |            |                              |  |         |           |            |                        |                      |           |   |
| PG0702  |        | 6 E-1                                                                                  | 1.7       | 2.5        | -0.5468                | 2.0743               | Y          |                              |  | G       | 2.23 E-5  | 1.85 E+3   | 5.31 E+5               | -8.1650              | 19.0237   | G |
| PGN0736 | PG0632 | <i>nicotinate-nucleotide--dimethylbenzimidazole phosphoribosyltransferase putative</i> |           |            |                        |                      |            |                              |  |         |           |            |                        |                      |           |   |
| PG0704  |        | 5.17 E-1                                                                               | 1.7       | 3          | -0.8099                | 2.2361               | Y          |                              |  | G       | 1.98 E-4  | 1.85 E+3   | 7.54 E+5               | -8.6712              | 19.5285   | G |
| PGN0738 | PG0634 | <i>phosphoglycerate mutase family protein</i>                                          |           |            |                        |                      |            |                              |  |         |           |            |                        |                      |           |   |
| PG0705  |        | 6.78 E-1                                                                               | 25.7      | 25         | 0.0381                 | 5.6630               | Y          |                              |  | R       | 2.4 E-11  | 1.73 E+7   | 7.32 E+6               | 1.2406               | 24.5537   | R |
| PGN0739 | PG0635 | <i>murl glutamate racemase</i>                                                         |           |            |                        |                      |            |                              |  |         |           |            |                        |                      |           |   |
| PG0706  |        | 4.93 E-1                                                                               | 7.7       | 10.5       | -0.4473                | 4.1859               | Y          |                              |  | Y       | 1.08 E-1  | 4.71 E+6   | 5.68 E+6               | -0.2716              | 23.3091   | Y |
| PGN0740 | PG0636 | <i>hypothetical protein PG_0706</i>                                                    |           |            |                        |                      |            |                              |  |         |           |            |                        |                      |           |   |
| PG0707  |        | 0                                                                                      | 160.9     | 436.5      | -1.4402                | 9.2225               | G          |                              |  | G       | 7.61 E-16 | 6.17 E+7   | 2.34 E+8               | -1.9211              | 28.1370   | G |
| PGN0741 | PG0637 | <i>TonB-dependent receptor putative</i>                                                |           |            |                        |                      |            |                              |  |         |           |            |                        |                      |           |   |

| TIGR    |        | PP PPC / Pg Spectral Count                                     |           |            |                        |                      |                                                                                                                                                                                 |           | PP PPC/ Pg Protein Intensity |            |                        |                      |                                                                                         | 33277 |
|---------|--------|----------------------------------------------------------------|-----------|------------|------------------------|----------------------|---------------------------------------------------------------------------------------------------------------------------------------------------------------------------------|-----------|------------------------------|------------|------------------------|----------------------|-----------------------------------------------------------------------------------------|-------|
| PGN     | LANL   | q-value                                                        | PP (Norm) | PPC (Norm) | log <sub>2</sub> Ratio | log <sub>2</sub> Sum | Regulation                                                                                                                                                                      | q-value   | PP (Norm)                    | PPC (Norm) | log <sub>2</sub> Ratio | log <sub>2</sub> Sum | Consensus                                                                               |       |
| PG0708  |        | 6.89 E-8                                                       | 253.3     | 401        | -0.6629                | 9.3537               | G   Y     | 1.2 E-2   | 8.98 E+7                     | 1.53 E+8   | -0.7657                | 27.8540              | G    |       |
| PGN0742 | PG0639 | <i>peptidyl-prolyl cis-trans isomerase FKBP-type</i>           |           |            |                        |                      |                                                                                                                                                                                 |           |                              |            |                        |                      |                                                                                         |       |
| PG0709  |        | 1.31 E-1                                                       | 44.5      | 29         | 0.6176                 | 6.1996               | Y   Y     | 3.21 E-2  | 6.24 E+7                     | 4.35 E+7   | 0.5201                 | 26.6591              | Y    |       |
| PGN0743 | PG0640 | <i>fkpA peptidyl-prolyl cis-trans isomerase FkpA FKBP-type</i> |           |            |                        |                      |                                                                                                                                                                                 |           |                              |            |                        |                      |                                                                                         |       |
| PG0710  |        | 2.31 E-4                                                       | 24.8      | 4          | 2.6331                 | 4.8487               | R   R     | 5.17 E-9  | 1.26 E+7                     | 2.46 E+6   | 2.3504                 | 23.8409              | R    |       |
| PGN0744 | PG0641 | <i>peptidyl-prolyl cis-trans isomerase FKBP-type</i>           |           |            |                        |                      |                                                                                                                                                                                 |           |                              |            |                        |                      |                                                                                         |       |
| PG0712  |        | 4.91 E-1                                                       | 10.3      | 13.5       | -0.3948                | 4.5709               | Y   Y     | 7.61 E-2  | 4.4 E+6                      | 3.59 E+6   | 0.2942                 | 22.9300              | Y    |       |
| PGN0746 | PG0642 | <i>hypothetical protein PG_0712</i>                            |           |            |                        |                      |                                                                                                                                                                                 |           |                              |            |                        |                      |                                                                                         |       |
| PG0713  |        | 4.4 E-1                                                        | 1.7       | 3.5        | -1.0323                | 2.3816               | Y   G     | 5.69 E-6  | 1.85 E+3                     | 3.9 E+5    | -7.7184                | 18.5790              | G    |       |
| PGN0747 | PG0643 | <i>trpG anthranilate synthase component II</i>                 |           |            |                        |                      |                                                                                                                                                                                 |           |                              |            |                        |                      |                                                                                         |       |
|         |        | 5.17 E-1                                                       | 73.6      | 66.5       | 0.1461                 | 7.1302               | Y   Y     | 4.8 E-2   | 3.72 E+7                     | 3.31 E+7   | 0.1698                 | 26.0665              | Y    |       |
| PGN0748 |        |                                                                |           |            |                        |                      |                                                                                                                                                                                 |           |                              |            |                        |                      |                                                                                         |       |
| PG0714  |        | 2.84 E-2                                                       | 1.7       | 10         | -2.5468                | 3.5498               | Y   Y     | 3.74 E-2  | 7.93 E+5                     | 1.03 E+6   | -0.3812                | 20.8009              | Y    |       |
| PGN0750 | PG0644 | <i>cutC copper homeostasis protein CutC</i>                    |           |            |                        |                      |                                                                                                                                                                                 |           |                              |            |                        |                      |                                                                                         |       |
| PG0715  |        | 4.23 E-1                                                       | 2.6       | 1          | 1.3601                 | 1.8347               | Y   R     | 0         | 9.82 E+5                     | 1 E+3      | 9.9391                 | 19.9064              | R    |       |
| PGN0751 | PG0645 | <i>transporter</i>                                             |           |            |                        |                      |                                                                                                                                                                                 |           |                              |            |                        |                      |                                                                                         |       |
| PG0724  |        | 1.44 E-2                                                       | 167.7     | 223.5      | -0.4143                | 8.6118               | Y   G     | 2.34 E-5  | 9.48 E+7                     | 1.59 E+8   | -0.7500                | 27.9209              | G    |       |
| PGN0756 | PG0652 | <i>prolyl oligopeptidase family protein</i>                    |           |            |                        |                      |                                                                                                                                                                                 |           |                              |            |                        |                      |                                                                                         |       |
| PG0725  |        | 1.45 E-1                                                       | 5.1       | 1          | 2.3601                 | 2.6168               | Y   R     | 2.92 E-10 | 2.6 E+6                      | 1 E+3      | 11.3430                | 21.3093              | R    |       |
| PGN0757 | PG0653 | <i>hydrolase haloacid dehalogenase-like family</i>             |           |            |                        |                      |                                                                                                                                                                                 |           |                              |            |                        |                      |                                                                                         |       |
| PG0726  |        | 1.52 E-4                                                       | 22.2      | 59.5       | -1.4193                | 6.3531               | G   Y     | 1.22 E-3  | 2.61 E+7                     | 7.08 E+7   | -1.4379                | 26.5303              | G    |       |
| PGN0758 | PG0654 | <i>lipoprotein putative</i>                                    |           |            |                        |                      |                                                                                                                                                                                 |           |                              |            |                        |                      |                                                                                         |       |
| PG0728  |        | 6.69 E-1                                                       | 9.4       | 10         | -0.0874                | 4.2789               | Y   Y   | 4.54 E-2  | 3.86 E+6                     | 2.55 E+6   | 0.5950                 | 22.6119              | Y   |       |
| PGN0759 | PG0655 | <i>conserved hypothetical protein</i>                          |           |            |                        |                      |                                                                                                                                                                                 |           |                              |            |                        |                      |                                                                                         |       |
| PG0729  |        | 6.92 E-2                                                       | 3.4       | 11.5       | -1.7485                | 3.8994               | Y   G | 1.95 E-4  | 8.58 E+5                     | 3.95 E+6   | -2.2028                | 22.1968              | G  |       |
| PGN0760 | PG0656 | <i>ddlA D-alanine--D-alanine ligase</i>                        |           |            |                        |                      |                                                                                                                                                                                 |           |                              |            |                        |                      |                                                                                         |       |
| PG0733  |        | 1.92 E-1                                                       | 38.5      | 26         | 0.5665                 | 6.0113               | Y   R | 8.36 E-4  | 2.24 E+7                     | 1.31 E+7   | 0.7717                 | 25.0825              | R  |       |
| PGN0764 | PG0661 | <i>ribE riboflavin synthase alpha subunit</i>                  |           |            |                        |                      |                                                                                                                                                                                 |           |                              |            |                        |                      |                                                                                         |       |
| PG0734  |        | 6.45 E-2                                                       | 18.0      | 33.5       | -0.8987                | 5.6856               | Y   Y | 1.51 E-2  | 7.66 E+6                     | 1.24 E+7   | -0.6925                | 24.2557              | Y  |       |
| PGN0765 | PG0662 | <i>nitroreductase family protein</i>                           |           |            |                        |                      |                                                                                                                                                                                 |           |                              |            |                        |                      |                                                                                         |       |
| PG0735  |        | 4.4 E-1                                                        | 21.4      | 27         | -0.3359                | 5.5967               | Y   R | 2.24 E-6  | 8.25 E+6                     | 3.93 E+6   | 1.0690                 | 23.5379              | Y  |       |
| PGN0766 | PG0663 | <i>aminotransferase class V</i>                                |           |            |                        |                      |                                                                                                                                                                                 |           |                              |            |                        |                      |                                                                                         |       |
| PG0737  |        | 1.45 E-1                                                       | 5.1       | 1          | 2.3601                 | 2.6168               | Y   R | 2.13 E-13 | 1.23 E+6                     | 1 E+3      | 10.2692                | 20.2361              | R  |       |
| PGN0768 | PG0665 | <i>hypothetical protein PG_0737</i>                            |           |            |                        |                      |                                                                                                                                                                                 |           |                              |            |                        |                      |                                                                                         |       |



| TIGR    |        | PP PPC / Pg Spectral Count                               |           |            |                        |                      |            | PP PPC/ Pg Protein Intensity |           |            |                        |                      |           | 33277 |
|---------|--------|----------------------------------------------------------|-----------|------------|------------------------|----------------------|------------|------------------------------|-----------|------------|------------------------|----------------------|-----------|-------|
| PGN     | LANL   | q-value                                                  | PP (Norm) | PPC (Norm) | log <sub>2</sub> Ratio | log <sub>2</sub> Sum | Regulation | q-value                      | PP (Norm) | PPC (Norm) | log <sub>2</sub> Ratio | log <sub>2</sub> Sum | Consensus |       |
| PG0738  |        | 6.69 E-1                                                 | 1.7       | 2          | -0.2249                | 1.8919               | Y ●● G     | 7.02 E-8                     | 1.85 E+3  | 1.98 E+5   | -6.7403                | 17.6075              | G ●       |       |
| PGN0769 | PG0666 | <i>cytidine/deoxycytidylate deaminase family protein</i> |           |            |                        |                      |            |                              |           |            |                        |                      |           |       |
| PG0739  |        | 3.71 E-1                                                 | 9.4       | 5.5        | 0.7751                 | 3.8984               | Y ●● Y     | 1.08 E-1                     | 1.24 E+6  | 1.72 E+6   | -0.4731                | 21.4951              | Y ●       |       |
| PGN0770 | PG0667 | <i>metallo-beta-lactamase family protein</i>             |           |            |                        |                      |            |                              |           |            |                        |                      |           |       |
| PG0745  |        | 3.64 E-1                                                 | 5.1       | 9          | -0.8099                | 3.8211               | Y ●● Y     | 8.85 E-2                     | 3.05 E+6  | 2.2 E+6    | 0.4697                 | 22.3231              | Y ●       |       |
| PGN0773 | PG0673 | <i>lactoylglutathione lyase putative</i>                 |           |            |                        |                      |            |                              |           |            |                        |                      |           |       |
| PG0747  |        | 6.33 E-1                                                 | 7.7       | 6.5        | 0.2446                 | 3.8279               | Y ●● R     | 1.59 E-6                     | 1.73 E+6  | 5.41 E+5   | 1.6811                 | 21.1173              | R ●       |       |
| PGN0775 | PG0675 | <i>sigma-54 dependent DNA-binding response regulator</i> |           |            |                        |                      |            |                              |           |            |                        |                      |           |       |
| PG0750  |        | 5.17 E-1                                                 | 3.4       | 2          | 0.7751                 | 2.4390               | Y ●● R     | 1.5 E-4                      | 1.15 E+6  | 6.66 E+5   | 0.7863                 | 20.7917              | R ●       |       |
| PGN0777 | PG0676 | <i>glycosyl transferase group 2 family protein</i>       |           |            |                        |                      |            |                              |           |            |                        |                      |           |       |
| PG0751  |        | 6.69 E-5                                                 | 1.7       | 21         | -3.6172                | 4.5053               | G ●● G     | 5.43 E-6                     | 1.85 E+3  | 6.74 E+6   | -11.8297               | 22.6838              | G ●       |       |
| PGN0778 | PG0677 | <i>porT porT protein</i>                                 |           |            |                        |                      |            |                              |           |            |                        |                      |           |       |
| PG0752  |        | 8.33 E-5                                                 | 14.5      | 48         | -1.7224                | 5.9668               | G ●● G     | 8.31 E-6                     | 1.03 E+7  | 2.63 E+7   | -1.3469                | 25.1273              | G ●       |       |
| PGN0779 | PG0678 | <i>uracil phosphoribosyltransferase putative</i>         |           |            |                        |                      |            |                              |           |            |                        |                      |           |       |
| PG0753  |        | 4.21 E-1                                                 | 3.4       | 1.5        | 1.1901                 | 2.2994               | Y ●● R     | 9.64 E-4                     | 1.26 E+6  | 1.62 E+5   | 2.9580                 | 20.4364              | R ●       |       |
| PGN0780 | PG0679 | <i>prtQ protease</i>                                     |           |            |                        |                      |            |                              |           |            |                        |                      |           |       |
| PG0754  |        | 1.21 E-2                                                 | 25.7      | 9          | 1.5121                 | 5.1156               | Y ●● R     | 2.26 E-5                     | 6.49 E+6  | 2.82 E+6   | 1.2007                 | 23.1502              | R ●       |       |
| PGN0781 | PG0680 | <i>topA DNA topoisomerase I</i>                          |           |            |                        |                      |            |                              |           |            |                        |                      |           |       |
| PGN0783 |        | 5.43 E-1                                                 | 12.0      | 9.5        | 0.3345                 | 4.4249               | Y ●● Y     | 3.11 E-3                     | 4.81 E+6  | 2.71 E+6   | 0.8296                 | 22.8422              | Y ●       |       |
| PGN0784 |        | 3.43 E-1                                                 | 24.0      | 17         | 0.4950                 | 5.3561               | Y ●● Y     | 4.1 E-3                      | 8.27 E+6  | 4.87 E+6   | 0.7641                 | 23.6483              | Y ●       |       |
| PG0756  |        | 1.61 E-1                                                 | 6.8       | 2          | 1.7751                 | 3.1449               | Y ●● Y     | 6.07 E-2                     | 9.57 E+5  | 6.69 E+5   | 0.5163                 | 20.6324              | Y ●       |       |
| PGN0786 | PG0682 | <i>conserved hypothetical protein</i>                    |           |            |                        |                      |            |                              |           |            |                        |                      |           |       |
| PG0758  |        | 6.96 E-1                                                 | 68.5      | 69         | -0.0115                | 7.1028               | Y ●● Y     | 1.82 E-1                     | 4.38 E+7  | 4.47 E+7   | -0.0289                | 26.3996              | Y ●       |       |
| PGN0788 | PG0684 | <i>dcp-1 peptidyl-dipeptidase Dcp</i>                    |           |            |                        |                      |            |                              |           |            |                        |                      |           |       |
| PG0759  |        | 6.69 E-1                                                 | 26.5      | 28         | -0.0781                | 5.7689               | Y ●● Y     | 6.34 E-2                     | 6.25 E+6  | 7.75 E+6   | -0.3112                | 23.7392              | Y ●       |       |
| PGN0789 | PG0685 | <i>TPR domain protein</i>                                |           |            |                        |                      |            |                              |           |            |                        |                      |           |       |
| PG0762  |        | 5.43 E-1                                                 | 112.9     | 105        | 0.1052                 | 7.7678               | Y ●● R     | 6.82 E-10                    | 1.12 E+8  | 5.52 E+7   | 1.0260                 | 27.3216              | R ●       |       |
| PGN0791 | PG0687 | <i>trigger factor putative</i>                           |           |            |                        |                      |            |                              |           |            |                        |                      |           |       |
| PG0766  |        | 1.45 E-1                                                 | 287.5     | 331        | -0.2033                | 9.2726               | Y ●● Y     | 1.96 E-1                     | 2.58 E+8  | 2.59 E+8   | -0.0068                | 28.9453              | Y ●       |       |
| PGN0792 | PG0690 | <i>pnpA polyribonucleotide nucleotidyltransferase</i>    |           |            |                        |                      |            |                              |           |            |                        |                      |           |       |
| PG0767  |        | 1.26 E-2                                                 | 19.7      | 42         | -1.0937                | 5.9467               | Y ●● Y     | 4.68 E-3                     | 5.49 E+6  | 9.28 E+6   | -0.7587                | 23.8161              | Y ●       |       |
| PGN0793 | PG0691 | <i>malQ 4-alpha-glucanotransferase</i>                   |           |            |                        |                      |            |                              |           |            |                        |                      |           |       |



| TIGR    |        | PP PPC / Pg Spectral Count                                 |           |            |                        |                      |            | PP PPC/ Pg Protein Intensity |           |            |                        |                      |           | 33277 |
|---------|--------|------------------------------------------------------------|-----------|------------|------------------------|----------------------|------------|------------------------------|-----------|------------|------------------------|----------------------|-----------|-------|
| PGN     | LANL   | q-value                                                    | PP (Norm) | PPC (Norm) | log <sub>2</sub> Ratio | log <sub>2</sub> Sum | Regulation | q-value                      | PP (Norm) | PPC (Norm) | log <sub>2</sub> Ratio | log <sub>2</sub> Sum | Consensus |       |
| PG0768  |        | 2.14 E-1                                                   | 3.4       | 8.5        | -1.3124                | 3.5756               | Y ●● Y     | 1.92 E-3                     | 9.63 E+5  | 4.37 E+6   | -2.1807                | 22.3461              | Y ●       |       |
| PGN0794 | PG0692 | <i>conserved hypothetical protein</i>                      |           |            |                        |                      |            |                              |           |            |                        |                      |           |       |
| PG0769  |        | 6.18 E-2                                                   | 12.8      | 26.5       | -1.0459                | 5.2977               | Y ●● Y     | 1.35 E-1                     | 1.57 E+7  | 1.23 E+7   | 0.3486                 | 24.7410              | Y ●       |       |
| PGN0795 | PG0693 | <i>fibronectin type III domain protein</i>                 |           |            |                        |                      |            |                              |           |            |                        |                      |           |       |
| PG0774  |        | 6.69 E-1                                                   | 1.7       | 1.5        | 0.1901                 | 1.6832               | Y ●● G     | 0                            | 1.85 E+3  | 3.27 E+5   | -7.4660                | 18.3279              | Y ●       |       |
| PGN0798 | PG0695 | <i>hypothetical protein PG_0774</i>                        |           |            |                        |                      |            |                              |           |            |                        |                      |           |       |
| PG0775  |        | 6.34 E-3                                                   | 160.0     | 109        | 0.5538                 | 8.0715               | R ●● Y     | 1.86 E-3                     | 1.12 E+8  | 7.09 E+7   | 0.6559                 | 27.4451              | R ●       |       |
| PGN0799 | PG0696 | <i>acyl-CoA dehydrogenase family protein</i>               |           |            |                        |                      |            |                              |           |            |                        |                      |           |       |
| PG0776  |        | 4.76 E-7                                                   | 126.6     | 54.5       | 1.2164                 | 7.5009               | R ●● R     | 0                            | 7.17 E+7  | 2.27 E+7   | 1.6614                 | 26.4909              | R ●       |       |
| PGN0800 | PG0697 | <i>etfA-1 electron transfer flavoprotein alpha subunit</i> |           |            |                        |                      |            |                              |           |            |                        |                      |           |       |
| PG0777  |        | 0                                                          | 124.9     | 10         | 3.6430                 | 7.0760               | R ●● R     | 0                            | 6.12 E+7  | 1.21 E+7   | 2.3394                 | 26.1277              | R ●       |       |
| PGN0801 | PG0698 | <i>etfB-1 electron transfer flavoprotein beta subunit</i>  |           |            |                        |                      |            |                              |           |            |                        |                      |           |       |
| PG0778  |        | 6 E-1                                                      | 1.7       | 2.5        | -0.5468                | 2.0743               | Y ●● G     | 1.46 E-5                     | 1.85 E+3  | 8.05 E+5   | -8.7657                | 19.6227              | G ●       |       |
| PGN0802 | PG0699 | <i>conserved hypothetical protein</i>                      |           |            |                        |                      |            |                              |           |            |                        |                      |           |       |
| PG0779  |        | 1.64 E-2                                                   | 51.3      | 27         | 0.9271                 | 6.2917               | Y ●● R     | 1.37 E-4                     | 4.49 E+7  | 2.27 E+7   | 0.9833                 | 26.0118              | R ●       |       |
| PGN0803 | PG0700 | <i>hypothetical protein PG_0779</i>                        |           |            |                        |                      |            |                              |           |            |                        |                      |           |       |
| PG0780  |        | 3.29 E-4                                                   | 89.0      | 43.5       | 1.0326                 | 7.0497               | R ●● R     | 2.45 E-9                     | 8.66 E+7  | 3.59 E+7   | 1.2711                 | 26.8673              | R ●       |       |
| PGN0804 | PG0701 | <i>hypothetical protein PG_0780</i>                        |           |            |                        |                      |            |                              |           |            |                        |                      |           |       |
| PG0782  |        | 5.89 E-6                                                   | 242.1     | 145.5      | 0.7349                 | 8.5986               | R ●● Y     | 2.6 E-2                      | 5.61 E+8  | 4.42 E+8   | 0.3449                 | 29.9015              | R ●       |       |
| PGN0806 | PG0703 | <i>MotA/ToIQ/ExbB proton channel family protein</i>        |           |            |                        |                      |            |                              |           |            |                        |                      |           |       |
| PG0784  |        | 4.23 E-1                                                   | 14.5      | 19.5       | -0.4228                | 5.0894               | Y ●● Y     | 5.26 E-3                     | 6.58 E+6  | 3.97 E+6   | 0.7303                 | 23.3306              | Y ●       |       |
| PGN0808 | PG0705 | <i>polyprenyl synthetase</i>                               |           |            |                        |                      |            |                              |           |            |                        |                      |           |       |
| PG0785  |        | 6.81 E-6                                                   | 35.1      | 5.5        | 2.6732                 | 5.3428               | R ●● R     | 0                            | 5.22 E+7  | 5.7 E+6    | 3.1953                 | 25.7880              | R ●       |       |
| PGN0809 | PG0707 | <i>tonB protein putative</i>                               |           |            |                        |                      |            |                              |           |            |                        |                      |           |       |
| PG0788  |        | 1.76 E-2                                                   | 6.0       | 19.5       | -1.7030                | 4.6718               | Y ●● Y     | 3.64 E-3                     | 1.87 E+6  | 3.14 E+6   | -0.7443                | 22.2578              | Y ●       |       |
| PGN0811 | PG0709 | <i>hypothetical protein PG_0788</i>                        |           |            |                        |                      |            |                              |           |            |                        |                      |           |       |
| PG0789  |        | 4.23 E-1                                                   | 2.6       | 1          | 1.3601                 | 1.8347               | Y ●● R     | 0                            | 4.27 E+6  | 1 E+3      | 12.0608                | 22.0269              | R ●       |       |
| PGN0812 | PG0710 | <i>conserved hypothetical protein</i>                      |           |            |                        |                      |            |                              |           |            |                        |                      |           |       |
| PG0790  |        | 6.05 E-2                                                   | 6.8       | 1          | 2.7751                 | 2.9718               | Y ●● R     | 0                            | 3.05 E+6  | 1 E+3      | 11.5760                | 21.5422              | R ●       |       |
| PGN0813 | PG0711 | <i>obg GTP-binding protein Obg</i>                         |           |            |                        |                      |            |                              |           |            |                        |                      |           |       |
| PG0791  |        | 2.92 E-4                                                   | 37.6      | 10.5       | 1.8422                 | 5.5894               | R ●● R     | 0                            | 1.62 E+7  | 2.34 E+6   | 2.7936                 | 24.1481              | R ●       |       |
| PGN0814 | PG0712 | <i>adk adenylate kinase</i>                                |           |            |                        |                      |            |                              |           |            |                        |                      |           |       |
| PG0792  |        | 2.37 E-2                                                   | 3.4       | 14         | -2.0323                | 4.1229               | Y ●● G     | 1.81 E-7                     | 1.62 E+6  | 6.28 E+6   | -1.9504                | 22.9142              | G ●       |       |
| PGN0815 | PG0713 | <i>hpt hypoxanthine phosphoribosyltransferase</i>          |           |            |                        |                      |            |                              |           |            |                        |                      |           |       |

| TIGR    |        | PP PPC / Pg Spectral Count                                                             |           |            |                        |                      |            | PP PPC/ Pg Protein Intensity |   |         |           |            |                        | 33277                |           |     |
|---------|--------|----------------------------------------------------------------------------------------|-----------|------------|------------------------|----------------------|------------|------------------------------|---|---------|-----------|------------|------------------------|----------------------|-----------|-----|
| PGN     | LANL   | q-value                                                                                | PP (Norm) | PPC (Norm) | log <sub>2</sub> Ratio | log <sub>2</sub> Sum | Regulation |                              |   | q-value | PP (Norm) | PPC (Norm) | log <sub>2</sub> Ratio | log <sub>2</sub> Sum | Consensus |     |
| PG0793  |        | 3.9 E-3                                                                                | 95.0      | 55         | 0.7882                 | 7.2286               | R          | ●                            | ● | R       | 1.89 E-14 | 4.82 E+7   | 2.27 E+7               | 1.0861               | 26.0783   | R ● |
| PGN0816 | PG0714 | <i>fbp fructose-16-bisphosphatase</i>                                                  |           |            |                        |                      |            |                              |   |         |           |            |                        |                      |           |     |
| PG0794  |        | 6.1 E-5                                                                                | 18.8      | 1          | 4.2345                 | 4.3092               | R          | ●                            | ● | R       | 1.87 E-8  | 1.31 E+7   | 1 E+3                  | 13.6786              | 23.6445   | R ● |
| PGN0817 | PG0715 | <i>penicillin-binding protein 1A putative</i>                                          |           |            |                        |                      |            |                              |   |         |           |            |                        |                      |           |     |
| PG0796  |        | 1.16 E-2                                                                               | 51.3      | 26         | 0.9815                 | 6.2731               | Y          | ●                            | ● | R       | 5.14 E-16 | 2.15 E+7   | 7.05 E+6               | 1.6071               | 24.7660   | R ● |
| PGN0819 | PG0717 | <i>leuS leucyl-tRNA synthetase</i>                                                     |           |            |                        |                      |            |                              |   |         |           |            |                        |                      |           |     |
| PG0800  |        | 3.82 E-1                                                                               | 3.4       | 6.5        | -0.9253                | 3.3107               | Y          | ●                            | ● | Y       | 1.12 E-2  | 1.39 E+6   | 8.25 E+5               | 0.7522               | 21.0790   | Y ● |
| PGN0823 | PG0719 | <i>conserved hypothetical protein</i>                                                  |           |            |                        |                      |            |                              |   |         |           |            |                        |                      |           |     |
| PG0801  |        | 6.55 E-1                                                                               | 5.1       | 6          | -0.2249                | 3.4769               | Y          | ●                            | ● | Y       | 5.72 E-2  | 8.71 E+5   | 1.17 E+6               | -0.4264              | 20.9616   | Y ● |
| PGN0824 | PG0720 | <i>polyA polymerase family protein</i>                                                 |           |            |                        |                      |            |                              |   |         |           |            |                        |                      |           |     |
| PG0802  |        | 1.19 E-2                                                                               | 124.9     | 175        | -0.4863                | 8.2285               | Y          | ●                            | ● | G       | 2.42 E-4  | 4.43 E+7   | 7.91 E+7               | -0.8355              | 26.8792   | G ● |
| PGN0826 | PG0721 | <i>pdhD alpha keto acid dehydrogenase complex E3 component lipoamide dehydrogenase</i> |           |            |                        |                      |            |                              |   |         |           |            |                        |                      |           |     |
| PG0803  |        | 4.21 E-1                                                                               | 6.8       | 10.5       | -0.6172                | 4.1165               | Y          | ●                            | ● | Y       | 5.41 E-2  | 5.07 E+6   | 1.19 E+7               | -1.2276              | 24.0147   | Y ● |
| PGN0827 | PG0722 | <i>nagB glucosamine-6-phosphate isomerase</i>                                          |           |            |                        |                      |            |                              |   |         |           |            |                        |                      |           |     |
| PG0804  |        | 2.31 E-1                                                                               | 94.1      | 75.5       | 0.3181                 | 7.4062               | Y          | ●                            | ● | Y       | 7.86 E-2  | 4.52 E+7   | 5.47 E+7               | -0.2757              | 26.5745   | Y ● |
| PGN0828 | PG0723 | <i>flavodoxin</i>                                                                      |           |            |                        |                      |            |                              |   |         |           |            |                        |                      |           |     |
| PG0805  |        | 2.74 E-1                                                                               | 1.7       | 5          | -1.5468                | 2.7466               | Y          | ●                            | ● | G       | 4.21 E-7  | 3.43 E+5   | 2.81 E+6               | -3.0377              | 21.5896   | G ● |
| PGN0829 | PG0724 | <i>lgt prolipoprotein diacylglyceryl transferase</i>                                   |           |            |                        |                      |            |                              |   |         |           |            |                        |                      |           |     |
| PG0806  |        | 3.05 E-1                                                                               | 20.5      | 29         | -0.4979                | 5.6304               | Y          | ●                            | ● | Y       | 4.32 E-3  | 9.83 E+6   | 1.56 E+7               | -0.6688              | 24.6012   | Y ● |
| PGN0830 | PG0725 | <i>oxidoreductase Gfo/ldh/MocA family</i>                                              |           |            |                        |                      |            |                              |   |         |           |            |                        |                      |           |     |
| PG0807  |        | 5.8 E-1                                                                                | 16.3      | 19         | -0.2249                | 5.1399               | Y          | ●                            | ● | Y       | 1.73 E-1  | 8.13 E+6   | 8.59 E+6               | -0.0794              | 23.9947   | Y ● |
| PGN0831 | PG0726 | <i>NusB family protein</i>                                                             |           |            |                        |                      |            |                              |   |         |           |            |                        |                      |           |     |
| PG0809  |        | 2.27 E-4                                                                               | 21.4      | 57         | -1.4139                | 6.2926               | G          | ●                            | ● | G       | 2.26 E-6  | 9.17 E+6   | 1.99 E+7               | -1.1148              | 24.7904   | G ● |
| PGN0832 | PG0727 | <i>hypothetical protein PG_0809</i>                                                    |           |            |                        |                      |            |                              |   |         |           |            |                        |                      |           |     |
| PG0811  |        | 3.4 E-1                                                                                | 12.8      | 19         | -0.5659                | 4.9925               | Y          | ●                            | ● | Y       | 1.03 E-1  | 6.31 E+6   | 7.13 E+6               | -0.1774              | 23.6798   | Y ● |
| PGN0833 | PG0729 | <i>ruvA Holliday junction DNA helicase RuvA</i>                                        |           |            |                        |                      |            |                              |   |         |           |            |                        |                      |           |     |
| PG1493  |        | 4.81 E-2                                                                               | 4.3       | 14         | -1.7103                | 4.1921               | Y          | ●                            | ● | G       | 2.59 E-5  | 1.41 E+6   | 5.51 E+6               | -1.9689              | 22.7221   | G ● |
| PGN0836 | PG1308 | <i>hypothetical protein PG_1493</i>                                                    |           |            |                        |                      |            |                              |   |         |           |            |                        |                      |           |     |
| PG1492  |        | 3.05 E-1                                                                               | 3.4       | 1          | 1.7751                 | 2.1449               | Y          | ●                            | ● | R       | 0         | 2.49 E+6   | 1 E+3                  | 11.2818              | 21.2481   | R ● |
| PGN0837 | PG1307 | <i>hypothetical protein PG_1492</i>                                                    |           |            |                        |                      |            |                              |   |         |           |            |                        |                      |           |     |
| PG1433  |        | 2.72 E-1                                                                               | 4.3       | 9          | -1.0729                | 3.7310               | Y          | ●                            | ● | Y       | 1.03 E-2  | 8.47 E+5   | 5.09 E+6               | -2.5867              | 22.5014   | Y ● |
| PGN0840 | PG1256 | <i>hydrolase</i>                                                                       |           |            |                        |                      |            |                              |   |         |           |            |                        |                      |           |     |
| PG1434  |        | 2.74 E-1                                                                               | 8.6       | 4          | 1.0970                 | 3.6504               | Y          | ●                            | ● | R       | 3.57 E-4  | 2.41 E+6   | 1.15 E+6               | 1.0742               | 21.7623   | R ● |
| PGN0841 | PG1257 | <i>ispD 4-diphosphocytidyl-2C-methyl-D-erythritol synthase</i>                         |           |            |                        |                      |            |                              |   |         |           |            |                        |                      |           |     |

| TIGR    |        | PP PPC / Pg Spectral Count                                                               |           |            |                        |                      |            | PP PPC/ Pg Protein Intensity |   |         |           |            |                        | 33277                |           |     |
|---------|--------|------------------------------------------------------------------------------------------|-----------|------------|------------------------|----------------------|------------|------------------------------|---|---------|-----------|------------|------------------------|----------------------|-----------|-----|
| PGN     | LANL   | q-value                                                                                  | PP (Norm) | PPC (Norm) | log <sub>2</sub> Ratio | log <sub>2</sub> Sum | Regulation |                              |   | q-value | PP (Norm) | PPC (Norm) | log <sub>2</sub> Ratio | log <sub>2</sub> Sum | Consensus |     |
| PG1374  |        | 6.41 E-1                                                                                 | 63.3      | 60         | 0.0777                 | 6.9462               | Y          | ●                            | ● | Y       | 1.27 E-3  | 2.82 E+7   | 5.91 E+7               | -1.0680              | 26.3798   | Y ● |
| PGN0852 | PG1208 | <i>immunoreactive 47 kDa antigen PG97</i>                                                |           |            |                        |                      |            |                              |   |         |           |            |                        |                      |           |     |
| PG1378  |        | 6.69 E-1                                                                                 | 1.7       | 2          | -0.2249                | 1.8919               | Y          | ●                            | ● | Y       | 9.81 E-3  | 1.85 E+3   | 6.2 E+5                | -8.3882              | 19.2462   | Y ● |
| PGN0856 | PG1209 | <i>mutY A/G-specific adenine glycosylase</i>                                             |           |            |                        |                      |            |                              |   |         |           |            |                        |                      |           |     |
| PG1379  |        | 1.06 E-1                                                                                 | 12.8      | 24.5       | -0.9327                | 5.2224               | Y          | ●                            | ● | G       | 1.11 E-4  | 6.02 E+6   | 1.67 E+7               | -1.4690              | 24.4348   | G ● |
| PGN0857 | PG1210 | <i>ABC transporter periplasmic substrate-binding protein putative</i>                    |           |            |                        |                      |            |                              |   |         |           |            |                        |                      |           |     |
| PG1382  |        | 3.15 E-9                                                                                 | 40.2      | 118        | -1.5530                | 7.3057               | G          | ●                            | ● | G       | 1.29 E-8  | 1.83 E+7   | 9.53 E+7               | -2.3827              | 26.7587   | G ● |
| PGN0860 | PG1213 | <i>hypothetical protein PG_1382</i>                                                      |           |            |                        |                      |            |                              |   |         |           |            |                        |                      |           |     |
|         |        | 2.25 E-1                                                                                 | 6.8       | 2.5        | 1.4532                 | 3.2242               | Y          | ●                            | ● | Y       | 3.14 E-3  | 1.25 E+6   | 4.39 E+5               | 1.5065               | 20.6860   | Y ● |
| PGN0862 |        |                                                                                          |           |            |                        |                      |            |                              |   |         |           |            |                        |                      |           |     |
|         |        | 5.74 E-1                                                                                 | 4.3       | 3          | 0.5121                 | 2.8636               | Y          | ●                            | ● | Y       | 1.28 E-2  | 2.28 E+6   | 8.8 E+5                | 1.3727               | 21.5910   | Y ● |
| PGN0863 |        |                                                                                          |           |            |                        |                      |            |                              |   |         |           |            |                        |                      |           |     |
| PG1397  |        | 6.94 E-1                                                                                 | 18.8      | 18.5       | 0.0251                 | 5.2220               | Y          | ●                            | ● | Y       | 1.37 E-1  | 1.03 E+7   | 1.15 E+7               | -0.1526              | 24.3782   | Y ● |
| PGN0865 | PG1228 | <i>purH phosphoribosylaminoimidazolecarboxamide formyltransferase/IMP cyclohydrolase</i> |           |            |                        |                      |            |                              |   |         |           |            |                        |                      |           |     |
| PG1396  |        | 6.36 E-1                                                                                 | 62.5      | 66         | -0.0795                | 7.0052               | Y          | ●                            | ● | Y       | 1.12 E-1  | 3.17 E+7   | 3.68 E+7               | -0.2171              | 26.0298   | Y ● |
| PGN0866 | PG1227 | <i>mreB cell shape-determining protein MreB</i>                                          |           |            |                        |                      |            |                              |   |         |           |            |                        |                      |           |     |
| PG1393  |        | 6.69 E-1                                                                                 | 1.7       | 1.5        | 0.1901                 | 1.6832               | Y          | ●                            | ● | G       | 0         | 1.85 E+3   | 1.63 E+5               | -6.4615              | 17.3315   | Y ● |
| PGN0869 | PG1224 | <i>penicillin-binding protein 2 putative</i>                                             |           |            |                        |                      |            |                              |   |         |           |            |                        |                      |           |     |
| PG1389  |        | 3.82 E-1                                                                                 | 7.7       | 12         | -0.6399                | 4.3002               | Y          | ●                            | ● | Y       | 1.11 E-1  | 1.54 E+7   | 1.17 E+7               | 0.3980               | 24.6938   | Y ● |
| PGN0872 | PG1221 | <i>DNA-binding protein histone-like family</i>                                           |           |            |                        |                      |            |                              |   |         |           |            |                        |                      |           |     |
| PG1388  |        | 2.15 E-1                                                                                 | 4.3       | 1          | 2.0970                 | 2.4001               | Y          | ●                            | ● | Y       | 1.69 E-3  | 2.19 E+7   | 1 E+3                  | 14.4218              | 24.3877   | Y ● |
| PGN0873 | PG1220 | <i>hypothetical protein PG_1388</i>                                                      |           |            |                        |                      |            |                              |   |         |           |            |                        |                      |           |     |
| PG1387  |        | 9.48 E-2                                                                                 | 1.7       | 7.5        | -2.1318                | 3.2034               | Y          | ●                            | ● | G       | 1.34 E-4  | 1.85 E+3   | 5.04 E+6               | -11.4116             | 22.2658   | G ● |
| PGN0874 | PG1218 | <i>hypothetical protein PG_1387</i>                                                      |           |            |                        |                      |            |                              |   |         |           |            |                        |                      |           |     |
| PG1386  |        | 3.7 E-7                                                                                  | 111.2     | 44         | 1.3380                 | 7.2783               | R          | ●                            | ● | R       | 7.39 E-10 | 7.03 E+7   | 2.79 E+7               | 1.3322               | 26.5491   | R ● |
| PGN0875 | PG1217 | <i>gyrA DNA gyrase A subunit</i>                                                         |           |            |                        |                      |            |                              |   |         |           |            |                        |                      |           |     |
| PG1385  |        | 0                                                                                        | 282.4     | 90.5       | 1.6416                 | 8.5425               | R          | ●                            | ● | R       | 0         | 3.44 E+8   | 9.58 E+7               | 1.8437               | 28.7120   | R ● |
| PGN0876 | PG1216 | <i>TPR domain protein</i>                                                                |           |            |                        |                      |            |                              |   |         |           |            |                        |                      |           |     |
|         |        | 3.05 E-1                                                                                 | 6.8       | 12         | -0.8099                | 4.2361               | Y          | ●                            | ● | Y       | 1.24 E-1  | 3.08 E+6   | 2.61 E+6               | 0.2428               | 22.4397   | Y ● |
| PGN0877 |        |                                                                                          |           |            |                        |                      |            |                              |   |         |           |            |                        |                      |           |     |
| PG1401  |        | 5.92 E-1                                                                                 | 566.4     | 581        | -0.0366                | 10.1642              | Y          | ●                            | ● | Y       | 1.72 E-1  | 5.95 E+8   | 5.83 E+8               | 0.0309               | 30.1339   | Y ● |
| PGN0880 | PG1232 | <i>beta-eliminating lyase</i>                                                            |           |            |                        |                      |            |                              |   |         |           |            |                        |                      |           |     |
| PG1402  |        | 5.17 E-1                                                                                 | 1.7       | 3          | -0.8099                | 2.2361               | Y          | ●                            | ● | G       | 0         | 1.85 E+3   | 3.73 E+5               | -7.6556              | 18.5164   | G ● |
| PGN0881 | PG1233 | <i>AP endonuclease domain protein</i>                                                    |           |            |                        |                      |            |                              |   |         |           |            |                        |                      |           |     |

| TIGR    |        | PP PPC / Pg Spectral Count                                  |           |            |                        |                      |            | PP PPC/ Pg Protein Intensity |           |            |                        |                      |           | 33277 |
|---------|--------|-------------------------------------------------------------|-----------|------------|------------------------|----------------------|------------|------------------------------|-----------|------------|------------------------|----------------------|-----------|-------|
| PGN     | LANL   | q-value                                                     | PP (Norm) | PPC (Norm) | log <sub>2</sub> Ratio | log <sub>2</sub> Sum | Regulation | q-value                      | PP (Norm) | PPC (Norm) | log <sub>2</sub> Ratio | log <sub>2</sub> Sum | Consensus |       |
| PG1405  |        | 5.47 E-2                                                    | 2.6       | 10.5       | -2.0323                | 3.7079               | Y ● ● G    | 2.6 E-6                      | 6.84 E+5  | 3.46 E+6   | -2.3395                | 21.9835              | G ●       |       |
| PGN0884 | PG1236 | <i>hypothetical protein PG_1405</i>                         |           |            |                        |                      |            |                              |           |            |                        |                      |           |       |
| PG1407  |        | 1.84 E-1                                                    | 1.7       | 6          | -1.8099                | 2.9470               | Y ● ● Y    | 5.66 E-2                     | 6.04 E+5  | 7.94 E+5   | -0.3948                | 20.4154              | Y ●       |       |
| PGN0885 | PG1237 | <i>nitroimidazole resistance protein putative</i>           |           |            |                        |                      |            |                              |           |            |                        |                      |           |       |
| PG1408  |        | 6 E-1                                                       | 1.7       | 2.5        | -0.5468                | 2.0743               | Y ● ● G    | 0                            | 1.85 E+3  | 6.38 E+5   | -8.4285                | 19.2864              | G ●       |       |
| PGN0886 | PG1238 | <i>heavy metal efflux pump CzcD family</i>                  |           |            |                        |                      |            |                              |           |            |                        |                      |           |       |
| PG1411  |        | 6.49 E-1                                                    | 4.3       | 3.5        | 0.2897                 | 2.9594               | Y ● ● Y    | 3.45 E-2                     | 8.25 E+5  | 3.75 E+5   | 1.1375                 | 20.1939              | Y ●       |       |
| PGN0889 | PG1240 | <i>potassium uptake protein TrkA putative</i>               |           |            |                        |                      |            |                              |           |            |                        |                      |           |       |
| PG1414  |        | 1.03 E-8                                                    | 189.1     | 327.5      | -0.7924                | 9.0129               | G ● ● G    | 7.27 E-4                     | 1.27 E+8  | 1.85 E+8   | -0.5458                | 28.2151              | G ●       |       |
| PGN0890 | PG1242 | <i>hypothetical protein PG_1414</i>                         |           |            |                        |                      |            |                              |           |            |                        |                      |           |       |
| PG1416  |        | 5.93 E-1                                                    | 59.0      | 54.5       | 0.1154                 | 6.8271               | Y ● ● Y    | 8.74 E-2                     | 3.48 E+7  | 4.33 E+7   | -0.3156                | 26.2174              | Y ●       |       |
| PGN0891 | PG1243 | <i>fabK enoyl-(acyl-carrier-protein) reductase II</i>       |           |            |                        |                      |            |                              |           |            |                        |                      |           |       |
| PG1417  |        | 7.41 E-3                                                    | 95.8      | 58         | 0.7245                 | 7.2652               | R ● ● Y    | 1.42 E-2                     | 5.69 E+7  | 4.39 E+7   | 0.3734                 | 26.5873              | R ●       |       |
| PGN0893 | PG1244 | <i>fumB fumarate hydratase class I anaerobic</i>            |           |            |                        |                      |            |                              |           |            |                        |                      |           |       |
| PG1418  |        | 6 E-1                                                       | 3.4       | 2.5        | 0.4532                 | 2.5662               | Y ● ● R    | 0                            | 5.89 E+5  | 1.52 E+5   | 1.9536                 | 19.4981              | R ●       |       |
| PGN0894 | PG1245 | <i>dnaX DNA polymerase III gamma and tau subunits</i>       |           |            |                        |                      |            |                              |           |            |                        |                      |           |       |
| PG1422  |        | 6.69 E-1                                                    | 10.3      | 9.5        | 0.1121                 | 4.3051               | Y ● ● Y    | 1.68 E-1                     | 1.92 E+6  | 1.74 E+6   | 0.1435                 | 21.8006              | Y ●       |       |
| PGN0896 | PG1248 | <i>dacB D-alanyl-D-alanine carboxypeptidase</i>             |           |            |                        |                      |            |                              |           |            |                        |                      |           |       |
| PG1424  |        | 6.78 E-15                                                   | 367.1     | 623        | -0.7632                | 9.9514               | G ● ● G    | 9.11 E-8                     | 2.79 E+8  | 5.34 E+8   | -0.9397                | 29.5983              | G ●       |       |
| PGN0898 | PG1249 | <i>peptidylarginine deiminase</i>                           |           |            |                        |                      |            |                              |           |            |                        |                      |           |       |
| PG1427  |        | 7.99 E-4                                                    | 3.4       | 21         | -2.6172                | 4.6101               | G ● ● G    | 1.04 E-6                     | 1.24 E+6  | 8.43 E+6   | -2.7619                | 23.2055              | G ●       |       |
| PGN0900 | PG1251 | <i>thiol protease/hemagglutinin PrtT precursor putative</i> |           |            |                        |                      |            |                              |           |            |                        |                      |           |       |
| PG1428  |        | 5.17 E-1                                                    | 7.7       | 5.5        | 0.4856                 | 3.7226               | Y ● ● Y    | 9.57 E-3                     | 6.51 E+6  | 3.57 E+6   | 0.8681                 | 23.2653              | Y ●       |       |
| PGN0901 | PG1252 | <i>ribH riboflavin synthase beta subunit</i>                |           |            |                        |                      |            |                              |           |            |                        |                      |           |       |
| PG1430  |        | 6.05 E-2                                                    | 118.1     | 86.5       | 0.4490                 | 7.6765               | Y ● ● Y    | 1.4 E-2                      | 1.01 E+8  | 7.41 E+7   | 0.4522                 | 27.3861              | Y ●       |       |
| PGN0902 | PG1253 | <i>TPR domain protein</i>                                   |           |            |                        |                      |            |                              |           |            |                        |                      |           |       |
| PG1431  |        | 6.64 E-1                                                    | 4.3       | 5          | -0.2249                | 3.2139               | Y ● ● Y    | 2 E-2                        | 4.89 E+5  | 3.21 E+6   | -2.7146                | 21.8186              | Y ●       |       |
| PGN0903 | PG1254 | <i>DNA-binding response regulator LuxR family</i>           |           |            |                        |                      |            |                              |           |            |                        |                      |           |       |
| PG1432  |        | 6 E-1                                                       | 4.3       | 5.5        | -0.3624                | 3.2896               | Y ● ● R    | 3.11 E-6                     | 2.61 E+6  | 4.95 E+5   | 2.4009                 | 21.5682              | Y ●       |       |
| PGN0904 | PG1255 | <i>sensor histidine kinase</i>                              |           |            |                        |                      |            |                              |           |            |                        |                      |           |       |
| PG1065  |        | 9.03 E-2                                                    | 14.5      | 27.5       | -0.9188                | 5.3939               | Y ● ● G    | 7.8 E-4                      | 5.5 E+6   | 1.22 E+7   | -1.1450                | 24.0747              | G ●       |       |
| PGN0905 | PG0947 | <i>pyrD dihydroorotate dehydrogenase</i>                    |           |            |                        |                      |            |                              |           |            |                        |                      |           |       |
| PG1064  |        | 2.72 E-1                                                    | 4.3       | 9          | -1.0729                | 3.7310               | Y ● ● Y    | 1.83 E-2                     | 7.77 E+5  | 1.46 E+6   | -0.9097                | 21.0930              | Y ●       |       |
| PGN0906 | PG0946 | <i>dihydroorotate dehydrogenase putative</i>                |           |            |                        |                      |            |                              |           |            |                        |                      |           |       |

| TIGR    |        | PP PPC / Pg Spectral Count                    |           |            |                        |                      |            | PP PPC/ Pg Protein Intensity |           |            |                        |                      |           | 33277 |
|---------|--------|-----------------------------------------------|-----------|------------|------------------------|----------------------|------------|------------------------------|-----------|------------|------------------------|----------------------|-----------|-------|
| PGN     | LANL   | q-value                                       | PP (Norm) | PPC (Norm) | log <sub>2</sub> Ratio | log <sub>2</sub> Sum | Regulation | q-value                      | PP (Norm) | PPC (Norm) | log <sub>2</sub> Ratio | log <sub>2</sub> Sum | Consensus |       |
| PG1063  |        | 6.97 E-1                                      | 3.4       | 3.5        | -0.0323                | 2.7913               | Y ●● R     | 3.67 E-4                     | 1.57 E+6  | 7.42 E+5   | 1.0790                 | 21.1399              | Y ●       |       |
| PGN0907 | PG0945 | <i>transcriptional regulator putative</i>     |           |            |                        |                      |            |                              |           |            |                        |                      |           |       |
| PG1213  |        | 6.54 E-1                                      | 2.6       | 2          | 0.3601                 | 2.1912               | Y ●● R     | 6.77 E-4                     | 1.28 E+6  | 3.75 E+5   | 1.7737                 | 20.6618              | R ●       |       |
| PGN0911 | PG1074 | <i>rnhA ribonuclease H</i>                    |           |            |                        |                      |            |                              |           |            |                        |                      |           |       |
| PG1212  |        | 5.81 E-2                                      | 18.8      | 7.5        | 1.3276                 | 4.7183               | Y ●● Y     | 3.21 E-3                     | 1.49 E+7  | 2.44 E+6   | 2.6109                 | 24.0499              | Y ●       |       |
| PGN0912 | PG1073 | <i>TPR domain protein</i>                     |           |            |                        |                      |            |                              |           |            |                        |                      |           |       |
| PG1211  |        | 4.4 E-1                                       | 1.7       | 3.5        | -1.0323                | 2.3816               | Y ●● G     | 6.8 E-4                      | 1.85 E+3  | 1.61 E+6   | -9.7690                | 20.6244              | G ●       |       |
| PGN0913 | PG1072 | <i>hexapeptide transferase family protein</i> |           |            |                        |                      |            |                              |           |            |                        |                      |           |       |
| PG1210  |        | 3.92 E-4                                      | 259.3     | 357        | -0.4615                | 9.2674               | G ●● G     | 5.79 E-5                     | 2.04 E+8  | 3.1 E+8    | -0.6063                | 28.9384              | G ●       |       |
| PGN0914 | PG1071 | <i>peptidase M24 family</i>                   |           |            |                        |                      |            |                              |           |            |                        |                      |           |       |
| PG1209  |        | 4.23 E-1                                      | 35.9      | 43.5       | -0.2755                | 6.3117               | Y ●● Y     | 1.34 E-2                     | 1.42 E+7  | 1.08 E+7   | 0.4021                 | 24.5753              | Y ●       |       |
| PGN0915 | PG1070 | <i>hypothetical protein PG_1209</i>           |           |            |                        |                      |            |                              |           |            |                        |                      |           |       |
| PG1208  |        | 3.05 E-1                                      | 393.6     | 427.5      | -0.1192                | 9.6814               | Y ●● Y     | 4.13 E-2                     | 2.73 E+8  | 2.38 E+8   | 0.2006                 | 28.9277              | Y ●       |       |
| PGN0916 | PG1069 | <i>dnaK dnaK protein</i>                      |           |            |                        |                      |            |                              |           |            |                        |                      |           |       |
|         |        | 7.31 E-2                                      | 18.0      | 33         | -0.8770                | 5.6715               | Y ●● Y     | 6.83 E-2                     | 1.24 E+7  | 1.51 E+7   | -0.2872                | 24.7149              | Y ●       |       |
| PGN0928 |        |                                               |           |            |                        |                      |            |                              |           |            |                        |                      |           |       |
|         |        | 4.4 E-1                                       | 26.5      | 21         | 0.3370                 | 5.5706               | Y ●● R     | 4.95 E-5                     | 1.52 E+7  | 4.78 E+6   | 1.6651                 | 24.2487              | R ●       |       |
| PGN0929 |        |                                               |           |            |                        |                      |            |                              |           |            |                        |                      |           |       |
|         |        | 3.82 E-1                                      | 1.7       | 4          | -1.2249                | 2.5138               | Y ●● G     | 2.19 E-10                    | 1.85 E+3  | 2.59 E+6   | -10.4507               | 21.3054              | G ●       |       |
| PGN0930 |        |                                               |           |            |                        |                      |            |                              |           |            |                        |                      |           |       |
|         |        | 2.72 E-1                                      | 14.5      | 22.5       | -0.6293                | 5.2112               | Y ●● Y     | 9.57 E-3                     | 4.48 E+6  | 7.28 E+6   | -0.7004                | 23.4873              | Y ●       |       |
| PGN0933 |        |                                               |           |            |                        |                      |            |                              |           |            |                        |                      |           |       |
| PG1189  |        | 2.04 E-3                                      | 142.9     | 90         | 0.6669                 | 7.8635               | R ●● R     | 5.53 E-6                     | 1.12 E+8  | 6.89 E+7   | 0.7059                 | 27.4347              | R ●       |       |
| PGN0935 | PG1059 | <i>hypothetical protein PG_1189</i>           |           |            |                        |                      |            |                              |           |            |                        |                      |           |       |
| PG1190  |        | 3.85 E-1                                      | 5.1       | 2.5        | 1.0381                 | 2.9324               | Y ●● R     | 0                            | 2.22 E+6  | 4.86 E+5   | 2.1899                 | 21.3675              | R ●       |       |
| PGN0936 | PG1060 | <i>hprA glycerate dehydrogenase</i>           |           |            |                        |                      |            |                              |           |            |                        |                      |           |       |
| PG1195  |        | 6.15 E-1                                      | 9.4       | 11         | -0.2249                | 4.3514               | Y ●● Y     | 1.52 E-1                     | 2.47 E+6  | 2.3 E+6    | 0.1058                 | 22.1867              | Y ●       |       |
| PGN0938 | PG1061 | <i>bioF-2 8-amino-7-oxononanoate synthase</i> |           |            |                        |                      |            |                              |           |            |                        |                      |           |       |
|         |        | 5.17 E-1                                      | 1.7       | 3          | -0.8099                | 2.2361               | Y ●● G     | 0                            | 1.85 E+3  | 3.02 E+5   | -7.3508                | 18.2133              | G ●       |       |
| PGN0945 |        |                                               |           |            |                        |                      |            |                              |           |            |                        |                      |           |       |
|         |        | 4.15 E-1                                      | 2.6       | 5          | -0.9619                | 2.9197               | Y ●● Y     | 1.08 E-1                     | 1.26 E+6  | 1.18 E+6   | 0.0969                 | 21.2172              | Y ●       |       |
| PGN0946 |        |                                               |           |            |                        |                      |            |                              |           |            |                        |                      |           |       |
|         |        | 6.52 E-2                                      | 6.0       | 16         | -1.4175                | 4.4587               | Y ●● G     | 8.04 E-4                     | 1.79 E+6  | 4.39 E+6   | -1.2910                | 22.5600              | G ●       |       |
| PGN0948 |        |                                               |           |            |                        |                      |            |                              |           |            |                        |                      |           |       |

| TIGR    |        | PP PPC / Pg Spectral Count                                               |           |            |                        |                      |            | PP PPC/ Pg Protein Intensity |   |         |           |            |                        | 33277                |           |     |
|---------|--------|--------------------------------------------------------------------------|-----------|------------|------------------------|----------------------|------------|------------------------------|---|---------|-----------|------------|------------------------|----------------------|-----------|-----|
| PGN     | LANL   | q-value                                                                  | PP (Norm) | PPC (Norm) | log <sub>2</sub> Ratio | log <sub>2</sub> Sum | Regulation |                              |   | q-value | PP (Norm) | PPC (Norm) | log <sub>2</sub> Ratio | log <sub>2</sub> Sum | Consensus |     |
|         |        | 4.5 E-1                                                                  | 6.8       | 10         | -0.5468                | 4.0743               | Y          | ●                            | ● | Y       | 3.81 E-2  | 3.35 E+6   | 2.56 E+6               | 0.3900               | 22.4939   | Y ● |
| PGN0949 |        |                                                                          |           |            |                        |                      |            |                              |   |         |           |            |                        |                      |           |     |
|         |        | 5.43 E-1                                                                 | 3.4       | 5          | -0.5468                | 3.0743               | Y          | ●                            | ● | Y       | 2.62 E-3  | 2.25 E+6   | 1.27 E+6               | 0.8280               | 21.7476   | Y ● |
| PGN0950 |        |                                                                          |           |            |                        |                      |            |                              |   |         |           |            |                        |                      |           |     |
|         |        | 6.36 E-5                                                                 | 55.6      | 18.5       | 1.5880                 | 6.2117               | R          | ●                            | ● | R       | 1.93 E-11 | 3.15 E+7   | 1.14 E+7               | 1.4730               | 25.3548   | R ● |
| PGN0952 |        |                                                                          |           |            |                        |                      |            |                              |   |         |           |            |                        |                      |           |     |
| PG0992  |        | 0                                                                        | 201.1     | 60.5       | 1.7328                 | 8.0311               | R          | ●                            | ● | R       | 0         | 7.67 E+7   | 2.86 E+7               | 1.4236               | 26.6491   | R ● |
| PGN0962 | PG0888 | <i>thrS threonyl-tRNA synthetase</i>                                     |           |            |                        |                      |            |                              |   |         |           |            |                        |                      |           |     |
| PG0991  |        | 2.68 E-4                                                                 | 18.0      | 1.5        | 3.5825                 | 4.2831               | R          | ●                            | ● | R       | 0         | 2.4 E+7    | 2.28 E+6               | 3.3970               | 24.6467   | R ● |
| PGN0963 | PG0887 | <i>infC translation initiation factor IF-3</i>                           |           |            |                        |                      |            |                              |   |         |           |            |                        |                      |           |     |
| PG0990  |        | 6.49 E-1                                                                 | 4.3       | 3.5        | 0.2897                 | 2.9594               | Y          | ●                            | ● | R       | 2.56 E-4  | 4.08 E+6   | 5.58 E+5               | 2.8698               | 22.1441   | R ● |
| PGN0964 |        | <i>rplM ribosomal protein L35</i>                                        |           |            |                        |                      |            |                              |   |         |           |            |                        |                      |           |     |
| PG0989  |        | 3.61 E-1                                                                 | 31.7      | 40.5       | -0.3553                | 6.1731               | Y          | ●                            | ● | Y       | 3.5 E-2   | 2.49 E+7   | 1.88 E+7               | 0.4051               | 25.3812   | Y ● |
| PGN0965 | PG0886 | <i>rplT ribosomal protein L20</i>                                        |           |            |                        |                      |            |                              |   |         |           |            |                        |                      |           |     |
| PG0982  |        | 1.85 E-3                                                                 | 54.8      | 24         | 1.1901                 | 6.2994               | R          | ●                            | ● | R       | 1.63 E-12 | 1.61 E+7   | 6.56 E+6               | 1.2962               | 24.4346   | R ● |
| PGN0972 | PG0878 | <i>TPR domain protein</i>                                                |           |            |                        |                      |            |                              |   |         |           |            |                        |                      |           |     |
| PG0980  |        | 6.69 E-1                                                                 | 2.6       | 3          | -0.2249                | 2.4769               | Y          | ●                            | ● | Y       | 4.22 E-2  | 3.42 E+5   | 2.63 E+5               | 0.3774               | 19.2080   | Y ● |
| PGN0973 | PG0877 | <i>hypothetical protein PG_0980</i>                                      |           |            |                        |                      |            |                              |   |         |           |            |                        |                      |           |     |
| PG0978  |        | 6 E-1                                                                    | 1.7       | 2.5        | -0.5468                | 2.0743               | Y          | ●                            | ● | Y       | 2.16 E-3  | 1.85 E+3   | 2.62 E+5               | -7.1444              | 18.0083   | Y ● |
| PGN0974 | PG0875 | <i>aroE shikimate 5-dehydrogenase</i>                                    |           |            |                        |                      |            |                              |   |         |           |            |                        |                      |           |     |
| PG0977  |        | 2.92 E-1                                                                 | 3.4       | 7.5        | -1.1318                | 3.4492               | Y          | ●                            | ● | Y       | 5.61 E-3  | 1.07 E+6   | 2.23 E+6               | -1.0603              | 21.6516   | Y ● |
| PGN0975 | PG0874 | <i>ubiE ubiquinone/menaquinone biosynthesis methyltransferase UbiE</i>   |           |            |                        |                      |            |                              |   |         |           |            |                        |                      |           |     |
| PG0976  |        | 1.85 E-3                                                                 | 65.0      | 31         | 1.0688                 | 6.5854               | R          | ●                            | ● | R       | 6.02 E-4  | 3.99 E+7   | 2.41 E+7               | 0.7307               | 25.9314   | R ● |
| PGN0976 | PG0873 | <i>phosphoribosylaminoimidazole-succinocarboxamide synthase putative</i> |           |            |                        |                      |            |                              |   |         |           |            |                        |                      |           |     |
| PG0975  |        | 4.88 E-1                                                                 | 8.6       | 6          | 0.5121                 | 3.8636               | Y          | ●                            | ● | Y       | 1.83 E-2  | 1.23 E+6   | 5.75 E+5               | 1.0933               | 20.7820   | Y ● |
| PGN0977 | PG0872 | <i>PhoH family protein</i>                                               |           |            |                        |                      |            |                              |   |         |           |            |                        |                      |           |     |
| PG0973  |        | 4.23 E-1                                                                 | 2.6       | 1          | 1.3601                 | 1.8347               | Y          | ●                            | ● | R       | 0         | 2.27 E+5   | 1 E+3                  | 7.8236               | 17.7957   | R ● |
| PGN0980 | PG0871 | <i>alpha-12-mannosidase family protein</i>                               |           |            |                        |                      |            |                              |   |         |           |            |                        |                      |           |     |
| PG0968  |        | 6.85 E-1                                                                 | 4.3       | 4.5        | -0.0729                | 3.1339               | Y          | ●                            | ● | R       | 5.11 E-11 | 3.75 E+6   | 7.22 E+5               | 2.3753               | 22.0920   | Y ● |
| PGN0982 | PG0866 | <i>mrr Mrr restriction system protein</i>                                |           |            |                        |                      |            |                              |   |         |           |            |                        |                      |           |     |
| PG0965  |        | 1.76 E-2                                                                 | 11.1      | 28         | -1.3318                | 5.2900               | Y          | ●                            | ● | Y       | 1.69 E-3  | 3.13 E+6   | 8.99 E+6               | -1.5225              | 23.5310   | Y ● |
| PGN0984 | PG0865 | <i>phosphatidylserine decarboxylase-related protein</i>                  |           |            |                        |                      |            |                              |   |         |           |            |                        |                      |           |     |
| PG0962  |        | 5.47 E-4                                                                 | 52.2      | 20         | 1.3839                 | 6.1738               | R          | ●                            | ● | R       | 5.03 E-5  | 2.38 E+7   | 1.08 E+7               | 1.1342               | 25.0439   | R ● |
| PGN0987 | PG0861 | <i>proS prolyl-tRNA synthetase</i>                                       |           |            |                        |                      |            |                              |   |         |           |            |                        |                      |           |     |

| TIGR    |        | PP PPC / Pg Spectral Count                                          |           |            |                        |                      |            | PP PPC/ Pg Protein Intensity |   |         |           |            |                        | 33277                |           |     |
|---------|--------|---------------------------------------------------------------------|-----------|------------|------------------------|----------------------|------------|------------------------------|---|---------|-----------|------------|------------------------|----------------------|-----------|-----|
| PGN     | LANL   | q-value                                                             | PP (Norm) | PPC (Norm) | log <sub>2</sub> Ratio | log <sub>2</sub> Sum | Regulation |                              |   | q-value | PP (Norm) | PPC (Norm) | log <sub>2</sub> Ratio | log <sub>2</sub> Sum | Consensus |     |
| PG0961  |        | 4.55 E-1                                                            | 5.1       | 3          | 0.7751                 | 3.0240               | Y          | ●                            | ● | Y       | 1.88 E-3  | 3.12 E+6   | 1.37 E+6               | 1.1821               | 22.0996   | Y ● |
| PGN0988 | PG0860 | <i>hypothetical protein PG_0961</i>                                 |           |            |                        |                      |            |                              |   |         |           |            |                        |                      |           |     |
| PG0960  |        | 3.05 E-1                                                            | 3.4       | 1          | 1.7751                 | 2.1449               | Y          | ●                            | ● | R       | 0         | 1.18 E+6   | 1 E+3                  | 10.2070              | 20.1740   | R ● |
| PGN0989 | PG0859 | <i>conserved hypothetical protein</i>                               |           |            |                        |                      |            |                              |   |         |           |            |                        |                      |           |     |
| PG0959  |        | 1.74 E-1                                                            | 18.0      | 9.5        | 0.9195                 | 4.7797               | Y          | ●                            | ● | Y       | 5.71 E-2  | 8.94 E+6   | 6.04 E+6               | 0.5651               | 23.8365   | Y ● |
| PGN0990 | PG0858 | <i>mrp ATP-binding protein Mrp/Nbp35 family</i>                     |           |            |                        |                      |            |                              |   |         |           |            |                        |                      |           |     |
| PG0958  |        | 2.74 E-1                                                            | 6.8       | 12.5       | -0.8688                | 4.2739               | Y          | ●                            | ● | Y       | 2.25 E-2  | 1.21 E+6   | 2.82 E+6               | -1.2263              | 21.9404   | Y ● |
| PGN0991 | PG0857 | <i>ribonuclease BN putative</i>                                     |           |            |                        |                      |            |                              |   |         |           |            |                        |                      |           |     |
| PG0957  |        | 3.05 E-1                                                            | 2.6       | 6          | -1.2249                | 3.0988               | Y          | ●                            | ● | Y       | 7.25 E-2  | 8.35 E+5   | 1.01 E+6               | -0.2691              | 20.8130   | Y ● |
| PGN0992 | PG0856 | <i>ribF riboflavin biosynthesis protein RibF</i>                    |           |            |                        |                      |            |                              |   |         |           |            |                        |                      |           |     |
| PG0956  |        | 3.05 E-1                                                            | 3.4       | 1          | 1.7751                 | 2.1449               | Y          | ●                            | ● | R       | 0         | 6.42 E+5   | 1 E+3                  | 9.3272               | 19.2953   | R ● |
| PGN0993 | PG0855 | <i>peptidase M23/M37 family putative</i>                            |           |            |                        |                      |            |                              |   |         |           |            |                        |                      |           |     |
| PG0955  |        | 2.93 E-1                                                            | 6.8       | 3          | 1.1901                 | 3.2994               | Y          | ●                            | ● | Y       | 8.01 E-3  | 2.52 E+6   | 1.1 E+6                | 1.1955               | 21.7892   | Y ● |
| PGN0994 | PG0854 | <i>hypothetical protein PG_0955</i>                                 |           |            |                        |                      |            |                              |   |         |           |            |                        |                      |           |     |
| PG0954  |        | 4.23 E-1                                                            | 2.6       | 1          | 1.3601                 | 1.8347               | Y          | ●                            | ● | R       | 0         | 1.7 E+6    | 1 E+3                  | 10.7318              | 20.6984   | R ● |
| PGN0996 | PG0853 | <i>TPR domain protein</i>                                           |           |            |                        |                      |            |                              |   |         |           |            |                        |                      |           |     |
| PG0953  |        | 2.96 E-2                                                            | 3.4       | 13.5       | -1.9798                | 4.0809               | Y          | ●                            | ● | Y       | 4.96 E-3  | 6.72 E+5   | 1.07 E+7               | -3.9871              | 23.4343   | Y ● |
| PGN0997 | PG0852 | <i>dut deoxyuridine 5'-triphosphate nucleotidohydrolase</i>         |           |            |                        |                      |            |                              |   |         |           |            |                        |                      |           |     |
| PG0952  |        | 2.97 E-2                                                            | 16.3      | 34         | -1.0644                | 5.6513               | Y          | ●                            | ● | Y       | 4.15 E-3  | 5.11 E+6   | 1.51 E+7               | -1.5652              | 24.2696   | Y ● |
| PGN0998 | PG0851 | <i>ispG 1-hydroxy-2-methyl-2-(E)-butenyl 4-diphosphate synthase</i> |           |            |                        |                      |            |                              |   |         |           |            |                        |                      |           |     |
| PG0951  |        | 4.4 E-1                                                             | 18.0      | 13.5       | 0.4125                 | 4.9758               | Y          | ●                            | ● | Y       | 5.2 E-2   | 1.24 E+7   | 9.09 E+6               | 0.4533               | 24.3596   | Y ● |
| PGN0999 | PG0850 | <i>purE phosphoribosylaminoimidazole carboxylase PurE protein</i>   |           |            |                        |                      |            |                              |   |         |           |            |                        |                      |           |     |
| PG0950  |        | 7.04 E-1                                                            | 35.1      | 35         | 0.0034                 | 6.1310               | Y          | ●                            | ● | Y       | 6.41 E-2  | 4.69 E+7   | 7.06 E+7               | -0.5898              | 26.8086   | Y ● |
| PGN1000 | PG0848 | <i>gcvH glycine cleavage system H protein</i>                       |           |            |                        |                      |            |                              |   |         |           |            |                        |                      |           |     |
| PG0949  |        | 4.4 E-1                                                             | 1.7       | 3.5        | -1.0323                | 2.3816               | Y          | ●                            | ● | G       | 4.51 E-6  | 1.85 E+3   | 4.57 E+5               | -7.9485              | 18.8080   | G ● |
| PGN1001 | PG0847 | <i>conserved hypothetical protein</i>                               |           |            |                        |                      |            |                              |   |         |           |            |                        |                      |           |     |
| PG0948  |        | 4.23 E-1                                                            | 2.6       | 1          | 1.3601                 | 1.8347               | Y          | ●                            | ● | R       | 0         | 6.44 E+5   | 1 E+3                  | 9.3310               | 19.2990   | R ● |
| PGN1002 | PG0846 | <i>AMP nucleosidase putative</i>                                    |           |            |                        |                      |            |                              |   |         |           |            |                        |                      |           |     |
| PG0946  |        | 3.31 E-1                                                            | 16.3      | 10.5       | 0.6307                 | 4.7419               | Y          | ●                            | ● | R       | 4.42 E-4  | 1.19 E+7   | 6.43 E+6               | 0.8946               | 24.1314   | R ● |
| PGN1004 | PG0844 | <i>ABC transporter ATP-binding protein</i>                          |           |            |                        |                      |            |                              |   |         |           |            |                        |                      |           |     |
| PG0945  |        | 5.71 E-1                                                            | 18.0      | 21         | -0.2249                | 5.2842               | Y          | ●                            | ● | Y       | 1.6 E-2   | 1.19 E+7   | 1.82 E+7               | -0.6120              | 24.8448   | Y ● |
| PGN1005 | PG0843 | <i>ABC transporter permease protein putative</i>                    |           |            |                        |                      |            |                              |   |         |           |            |                        |                      |           |     |
| PG0937  |        | 5.76 E-5                                                            | 18.0      | 55         | -1.6139                | 6.1892               | G          | ●                            | ● | Y       | 3.54 E-3  | 8.59 E+6   | 2.19 E+7               | -1.3487              | 24.8612   | G ● |
| PGN1010 | PG0836 | <i>hypothetical protein PG_0937</i>                                 |           |            |                        |                      |            |                              |   |         |           |            |                        |                      |           |     |



| TIGR    |        | PP PPC / Pg Spectral Count                                   |           |            |                        |                      |            | PP PPC/ Pg Protein Intensity |  |         |           |            |                        | 33277                |           |   |
|---------|--------|--------------------------------------------------------------|-----------|------------|------------------------|----------------------|------------|------------------------------|--|---------|-----------|------------|------------------------|----------------------|-----------|---|
| PGN     | LANL   | q-value                                                      | PP (Norm) | PPC (Norm) | log <sub>2</sub> Ratio | log <sub>2</sub> Sum | Regulation |                              |  | q-value | PP (Norm) | PPC (Norm) | log <sub>2</sub> Ratio | log <sub>2</sub> Sum | Consensus |   |
| PG0936  |        | 3.06 E-1                                                     | 4.3       | 1.5        | 1.5121                 | 2.5306               | Y          |                              |  | R       | 1.34 E-6  | 7.29 E+6   | 6.74 E+5               | 3.4350               | 22.9253   | R |
| PGN1011 | PG0835 | <i>xanthine/uracil permease family protein</i>               |           |            |                        |                      |            |                              |  |         |           |            |                        |                      |           |   |
| PG0935  |        | 2.25 E-1                                                     | 1.7       | 5.5        | -1.6843                | 2.8503               | Y          |                              |  | Y       | 3.57 E-3  | 1.85 E+3   | 1.07 E+6               | -9.1776              | 20.0338   | Y |
| PGN1012 | PG0834 | <i>ispE 4-diphosphocytidyl-2C-methyl-D-erythritol kinase</i> |           |            |                        |                      |            |                              |  |         |           |            |                        |                      |           |   |
| PG0934  |        | 6.69 E-1                                                     | 1.7       | 1.5        | 0.1901                 | 1.6832               | Y          |                              |  | G       | 0         | 1.85 E+3   | 2.12 E+5               | -6.8385              | 17.7048   | Y |
| PGN1013 | PG0833 | <i>radical SAM domain protein</i>                            |           |            |                        |                      |            |                              |  |         |           |            |                        |                      |           |   |
| PG0933  |        | 8.74 E-2                                                     | 579.3     | 650.5      | -0.1673                | 10.2642              | Y          |                              |  | Y       | 9.55 E-3  | 6.3 E+8    | 5.42 E+8               | 0.2170               | 30.1257   | Y |
| PGN1014 | PG0832 | <i>translation elongation factor G putative</i>              |           |            |                        |                      |            |                              |  |         |           |            |                        |                      |           |   |
| PG0932  |        | 6.64 E-1                                                     | 6.8       | 6          | 0.1901                 | 3.6832               | Y          |                              |  | R       | 5.08 E-5  | 2.51 E+6   | 1.05 E+6               | 1.2602               | 21.7620   | R |
| PGN1015 | PG0831 | <i>DNA polymerase III delta prime subunit putative</i>       |           |            |                        |                      |            |                              |  |         |           |            |                        |                      |           |   |
|         |        | 4.21 E-1                                                     | 3.4       | 1.5        | 1.1901                 | 2.2994               | Y          |                              |  | R       | 0         | 1.25 E+6   | 1.1 E+5                | 3.4982               | 20.3727   | R |
| PGN1018 |        |                                                              |           |            |                        |                      |            |                              |  |         |           |            |                        |                      |           |   |
| PG0928  |        | 6.96 E-1                                                     | 33.4      | 33         | 0.0161                 | 6.0525               | Y          |                              |  | R       | 4.23 E-12 | 1.91 E+7   | 8.15 E+6               | 1.2263               | 24.6974   | R |
| PGN1019 | PG0827 | <i>response regulator</i>                                    |           |            |                        |                      |            |                              |  |         |           |            |                        |                      |           |   |
| PG0927  |        | 6.69 E-1                                                     | 1.7       | 2          | -0.2249                | 1.8919               | Y          |                              |  | G       | 0         | 1.85 E+3   | 3.65 E+5               | -7.6226              | 18.4837   | G |
| PGN1020 | PG0826 | <i>conserved hypothetical protein TIGR00150</i>              |           |            |                        |                      |            |                              |  |         |           |            |                        |                      |           |   |
| PG0925  |        | 4.4 E-1                                                      | 1.7       | 3.5        | -1.0323                | 2.3816               | Y          |                              |  | G       | 2.01 E-9  | 6.33 E+4   | 5.62 E+5               | -3.1502              | 19.2535   | G |
| PGN1022 | PG0825 | <i>tmk thymidine kinase</i>                                  |           |            |                        |                      |            |                              |  |         |           |            |                        |                      |           |   |
| PG0924  |        | 2.02 E-1                                                     | 6.0       | 12.5       | -1.0614                | 4.2086               | Y          |                              |  | Y       | 4.4 E-3   | 9.59 E+5   | 2.76 E+6               | -1.5247              | 21.8264   | Y |
| PGN1023 | PG0824 | <i>5'-nucleotidase lipoprotein e(P4) family</i>              |           |            |                        |                      |            |                              |  |         |           |            |                        |                      |           |   |
| PG0923  |        | 1.52 E-2                                                     | 9.4       | 1          | 3.2345                 | 3.3802               | Y          |                              |  | R       | 0         | 3.75 E+6   | 1 E+3                  | 11.8714              | 21.8375   | R |
| PGN1024 | PG0823 | <i>rbfA ribosome-binding factor A</i>                        |           |            |                        |                      |            |                              |  |         |           |            |                        |                      |           |   |
| PG0920  |        | 1.62 E-1                                                     | 7.7       | 2.5        | 1.6231                 | 3.3506               | Y          |                              |  | R       | 9.19 E-10 | 1.01 E+7   | 1.91 E+6               | 2.3952               | 23.5130   | R |
| PGN1026 | PG0820 | <i>glycosyl transferase group 2 family protein</i>           |           |            |                        |                      |            |                              |  |         |           |            |                        |                      |           |   |
| PG0919  |        | 5.67 E-4                                                     | 9.4       | 34         | -1.8529                | 5.4400               | G          |                              |  | G       | 2.62 E-9  | 3.65 E+6   | 1.33 E+7               | -1.8658              | 24.0136   | G |
| PGN1027 | PG0819 | <i>pyrC dihydroorotase</i>                                   |           |            |                        |                      |            |                              |  |         |           |            |                        |                      |           |   |
| PG0918  |        | 6 E-1                                                        | 1.7       | 2.5        | -0.5468                | 2.0743               | Y          |                              |  | G       | 2.26 E-6  | 1.85 E+3   | 1.73 E+6               | -9.8649              | 20.7202   | G |
| PGN1028 | PG0818 | <i>hypothetical protein PG_0918</i>                          |           |            |                        |                      |            |                              |  |         |           |            |                        |                      |           |   |
| PG0914  |        | 1.49 E-1                                                     | 12.0      | 22         | -0.8770                | 5.0866               | Y          |                              |  | G       | 8.18 E-4  | 4.47 E+6   | 9.4 E+6                | -1.0730              | 23.7255   | G |
| PGN1032 | PG0815 | <i>hypothetical protein PG_0914</i>                          |           |            |                        |                      |            |                              |  |         |           |            |                        |                      |           |   |
| PG0909  |        | 6.41 E-1                                                     | 6.0       | 5          | 0.2605                 | 3.4581               | Y          |                              |  | Y       | 2.91 E-2  | 2.53 E+6   | 1.61 E+6               | 0.6478               | 21.9808   | Y |
| PGN1035 | PG0811 | <i>conserved hypothetical protein</i>                        |           |            |                        |                      |            |                              |  |         |           |            |                        |                      |           |   |
| PG0906  |        | 8.7 E-2                                                      | 40.2      | 24         | 0.7447                 | 6.0049               | Y          |                              |  | Y       | 1.62 E-1  | 1.01 E+8   | 1.11 E+8               | -0.1363              | 27.6637   | Y |
| PGN1037 | PG0809 | <i>lipoprotein putative</i>                                  |           |            |                        |                      |            |                              |  |         |           |            |                        |                      |           |   |



| TIGR    |        | PP PPC / Pg Spectral Count                                           |           |            |                        |                      |            | PP PPC/ Pg Protein Intensity |  |         |           |            |                        | 33277                |           |   |
|---------|--------|----------------------------------------------------------------------|-----------|------------|------------------------|----------------------|------------|------------------------------|--|---------|-----------|------------|------------------------|----------------------|-----------|---|
| PGN     | LANL   | q-value                                                              | PP (Norm) | PPC (Norm) | log <sub>2</sub> Ratio | log <sub>2</sub> Sum | Regulation |                              |  | q-value | PP (Norm) | PPC (Norm) | log <sub>2</sub> Ratio | log <sub>2</sub> Sum | Consensus |   |
| PG0903  |        | 1.84 E-1                                                             | 1.7       | 6          | -1.8099                | 2.9470               | Y          |                              |  | G       | 3.46 E-8  | 1.85 E+3   | 4.19 E+6               | -11.1447             | 21.9991   | G |
| PGN1038 | PG0806 | <i>conserved hypothetical protein</i>                                |           |            |                        |                      |            |                              |  |         |           |            |                        |                      |           |   |
| PG0900  |        | 5.43 E-1                                                             | 8.6       | 6.5        | 0.3966                 | 3.9123               | Y          |                              |  | Y       | 2.38 E-2  | 3.23 E+6   | 5.28 E+6               | -0.7096              | 23.0200   | Y |
| PGN1041 | PG0803 | <i>cydA cytochrome d ubiquinol oxidase subunit I</i>                 |           |            |                        |                      |            |                              |  |         |           |            |                        |                      |           |   |
| PG0898  |        | 6.02 E-1                                                             | 5.1       | 4          | 0.3601                 | 3.1912               | Y          |                              |  | R       | 0         | 1.86 E+6   | 4.46 E+5               | 2.0585               | 21.1360   | R |
| PGN1043 | PG0801 | <i>conserved hypothetical protein</i>                                |           |            |                        |                      |            |                              |  |         |           |            |                        |                      |           |   |
| PG0897  |        | 7.56 E-2                                                             | 1.7       | 8          | -2.2249                | 3.2797               | Y          |                              |  | G       | 1.11 E-5  | 1.85 E+3   | 1.12 E+6               | -9.2457              | 20.1018   | G |
| PGN1044 | PG0800 | <i>alpha-amylase family protein</i>                                  |           |            |                        |                      |            |                              |  |         |           |            |                        |                      |           |   |
| PG0890  |        | 1.76 E-2                                                             | 78.7      | 117        | -0.5717                | 7.6126               | Y          |                              |  | G       | 4.89 E-7  | 4.45 E+7   | 9.07 E+7               | -1.0267              | 27.0112   | G |
| PGN1049 | PG0796 | <i>alkaline phosphatase putative</i>                                 |           |            |                        |                      |            |                              |  |         |           |            |                        |                      |           |   |
| PG0889  |        | 5.14 E-1                                                             | 16.3      | 20         | -0.2989                | 5.1802               | Y          |                              |  | Y       | 1.5 E-1   | 8.64 E+6   | 8.13 E+6               | 0.0868               | 23.9996   | Y |
| PGN1050 | PG0795 | <i>peptidase M24 family</i>                                          |           |            |                        |                      |            |                              |  |         |           |            |                        |                      |           |   |
| PG0886  |        | 6.69 E-1                                                             | 1.7       | 1.5        | 0.1901                 | 1.6832               | Y          |                              |  | G       | 0         | 1.85 E+3   | 8.61 E+4               | -5.5399              | 16.4243   | Y |
| PGN1052 | PG0794 | <i>hypothetical protein PG_0886</i>                                  |           |            |                        |                      |            |                              |  |         |           |            |                        |                      |           |   |
| PG0885  |        | 6.69 E-1                                                             | 3.4       | 3          | 0.1901                 | 2.6832               | Y          |                              |  | Y       | 1.85 E-1  | 8 E+5      | 7.55 E+5               | 0.0836               | 20.5677   | Y |
| PGN1053 | PG0793 | <i>phospho-2-dehydro-3-deoxyheptonate aldolase/chorismate mutase</i> |           |            |                        |                      |            |                              |  |         |           |            |                        |                      |           |   |
| PG0884  |        | 4.23 E-1                                                             | 3.4       | 6          | -0.8099                | 3.2361               | Y          |                              |  | Y       | 1.91 E-1  | 9.95 E+5   | 9.77 E+5               | 0.0264               | 20.9115   | Y |
| PGN1054 | PG0792 | <i>hypothetical protein PG_0884</i>                                  |           |            |                        |                      |            |                              |  |         |           |            |                        |                      |           |   |
| PG0883  |        | 6 E-1                                                                | 1.7       | 2.5        | -0.5468                | 2.0743               | Y          |                              |  | G       | 3.18 E-5  | 3.21 E+5   | 8.31 E+5               | -1.3720              | 20.1353   | G |
| PGN1055 | PG0791 | <i>hypothetical protein PG_0883</i>                                  |           |            |                        |                      |            |                              |  |         |           |            |                        |                      |           |   |
| PG0882  |        | 5.17 E-1                                                             | 1.7       | 3          | -0.8099                | 2.2361               | Y          |                              |  | G       | 2.39 E-4  | 1.85 E+3   | 6.08 E+5               | -8.3605              | 19.2186   | G |
| PGN1056 | PG0790 | <i>hypothetical protein PG_0882</i>                                  |           |            |                        |                      |            |                              |  |         |           |            |                        |                      |           |   |
| PG0881  |        | 2.7 E-2                                                              | 77.9      | 49         | 0.6682                 | 6.9871               | Y          |                              |  | Y       | 2.77 E-3  | 6.39 E+7   | 4.19 E+7               | 0.6106               | 26.6562   | Y |
| PGN1057 | PG0789 | <i>recA recA protein</i>                                             |           |            |                        |                      |            |                              |  |         |           |            |                        |                      |           |   |
| PG0880  |        | 5.94 E-2                                                             | 11.1      | 3          | 1.8906                 | 3.8200               | Y          |                              |  | R       | 7.03 E-9  | 3.81 E+6   | 1.04 E+6               | 1.8686               | 22.2090   | R |
| PGN1058 | PG0788 | <i>bcp bacterioferritin comigratory protein</i>                      |           |            |                        |                      |            |                              |  |         |           |            |                        |                      |           |   |
| PG0877  |        | 4.02 E-1                                                             | 4.3       | 2          | 1.0970                 | 2.6504               | Y          |                              |  | R       | 1.22 E-5  | 2 E+6      | 1 E+6                  | 0.9958               | 21.5197   | R |
| PGN1061 | PG0787 | <i>hypothetical protein PG_0877</i>                                  |           |            |                        |                      |            |                              |  |         |           |            |                        |                      |           |   |
| PG0876  |        | 2.52 E-1                                                             | 3.4       | 8          | -1.2249                | 3.5138               | Y          |                              |  | Y       | 9.23 E-2  | 1.31 E+6   | 1.67 E+6               | -0.3485              | 21.5051   | Y |
| PGN1062 | PG0786 | <i>thdF thiophene and furan oxidation protein ThdF</i>               |           |            |                        |                      |            |                              |  |         |           |            |                        |                      |           |   |
|         |        | 4.75 E-1                                                             | 23.1      | 18.5       | 0.3205                 | 5.3786               | Y          |                              |  | Y       | 8.26 E-2  | 2.98 E+6   | 3.51 E+6               | -0.2374              | 22.6300   | Y |
| PGN1071 |        |                                                                      |           |            |                        |                      |            |                              |  |         |           |            |                        |                      |           |   |
|         |        | 5.89 E-1                                                             | 1.7       | 1          | 0.7751                 | 1.4390               | Y          |                              |  | R       | 0         | 1.29 E+6   | 1 E+3                  | 10.3300              | 20.2969   | R |
| PGN1072 |        |                                                                      |           |            |                        |                      |            |                              |  |         |           |            |                        |                      |           |   |

| TIGR    |        | PP PPC / Pg Spectral Count                             |           |            |                        |                      |            | PP PPC/ Pg Protein Intensity |  |         |           |            |                        | 33277                |           |   |
|---------|--------|--------------------------------------------------------|-----------|------------|------------------------|----------------------|------------|------------------------------|--|---------|-----------|------------|------------------------|----------------------|-----------|---|
| PGN     | LANL   | q-value                                                | PP (Norm) | PPC (Norm) | log <sub>2</sub> Ratio | log <sub>2</sub> Sum | Regulation |                              |  | q-value | PP (Norm) | PPC (Norm) | log <sub>2</sub> Ratio | log <sub>2</sub> Sum | Consensus |   |
|         |        | 5.17 E-1                                               | 3.4       | 2          | 0.7751                 | 2.4390               | Y          |                              |  | Y       | 6.07 E-2  | 1.67 E+6   | 9.2 E+5                | 0.8606               | 21.3053   | Y |
| PGN1074 |        |                                                        |           |            |                        |                      |            |                              |  |         |           |            |                        |                      |           |   |
| PG1288  |        | 2.49 E-2                                               | 26.5      | 49         | -0.8854                | 6.2389               | Y          |                              |  | G       | 9.78 E-7  | 1.15 E+7   | 2.42 E+7               | -1.0788              | 25.0883   | G |
| PGN1078 | PG1134 | <i>gmd GDP-mannose 46-dehydratase</i>                  |           |            |                        |                      |            |                              |  |         |           |            |                        |                      |           |   |
| PG1289  |        | 3.57 E-3                                               | 1.7       | 14         | -3.0323                | 3.9737               | Y          |                              |  | G       | 2.05 E-7  | 5.5 E+5    | 3.45 E+6               | -2.6495              | 21.9321   | G |
| PGN1079 | PG1135 | <i>fcl GDP-fucose synthetase</i>                       |           |            |                        |                      |            |                              |  |         |           |            |                        |                      |           |   |
| PG1290  |        | 4.75 E-1                                               | 516.8     | 539.5      | -0.0620                | 10.0448              | Y          |                              |  | Y       | 2.15 E-2  | 3.43 E+8   | 4.73 E+8               | -0.4652              | 29.6044   | Y |
| PGN1080 | PG1136 | <i>livE branched-chain amino acid aminotransferase</i> |           |            |                        |                      |            |                              |  |         |           |            |                        |                      |           |   |
| PG1291  |        | 1.3 E-3                                                | 21.4      | 4          | 2.4190                 | 4.6663               | R          |                              |  | R       | 1.04 E-12 | 8.14 E+6   | 9.67 E+5               | 3.0730               | 23.1188   | R |
| PGN1081 | PG1137 | <i>hypothetical protein PG_1291</i>                    |           |            |                        |                      |            |                              |  |         |           |            |                        |                      |           |   |
| PG1294  |        | 3.5 E-1                                                | 4.3       | 8          | -0.9030                | 3.6180               | Y          |                              |  | R       | 5.04 E-4  | 1.52 E+6   | 7.22 E+5               | 1.0755               | 21.0966   | Y |
| PGN1085 | PG1138 | <i>feoB-2 ferrous iron transport protein B</i>         |           |            |                        |                      |            |                              |  |         |           |            |                        |                      |           |   |
| PG1297  |        | 0                                                      | 350.8     | 117.5      | 1.5781                 | 8.8713               | R          |                              |  | R       | 2.26 E-10 | 3.27 E+8   | 1.5 E+8                | 1.1240               | 28.8315   | R |
| PGN1088 | PG1140 | <i>rpsA ribosomal protein S1</i>                       |           |            |                        |                      |            |                              |  |         |           |            |                        |                      |           |   |
| PG1300  |        | 6.69 E-1                                               | 1.7       | 1.5        | 0.1901                 | 1.6832               | Y          |                              |  | G       | 0         | 1.85 E+3   | 9.21 E+4               | -5.6372              | 16.5196   | Y |
| PGN1089 | PG1141 | <i>conserved hypothetical protein</i>                  |           |            |                        |                      |            |                              |  |         |           |            |                        |                      |           |   |
| PG1301  |        | 5.43 E-1                                               | 2.6       | 1.5        | 0.7751                 | 2.0240               | Y          |                              |  | R       | 0         | 8.98 E+5   | 3.06 E+5               | 1.5543               | 20.1984   | R |
| PGN1090 | PG1142 | <i>hypothetical protein PG_1301</i>                    |           |            |                        |                      |            |                              |  |         |           |            |                        |                      |           |   |
| PG1302  |        | 8.78 E-3                                               | 73.6      | 41.5       | 0.8263                 | 6.8466               | R          |                              |  | Y       | 8.7 E-2   | 7.57 E+7   | 6.12 E+7               | 0.3066               | 27.0293   | R |
| PGN1091 | PG1143 | <i>hypothetical protein PG_1302</i>                    |           |            |                        |                      |            |                              |  |         |           |            |                        |                      |           |   |
| PG1304  |        | 4.4 E-1                                                | 1.7       | 3.5        | -1.0323                | 2.3816               | Y          |                              |  | Y       | 5.41 E-2  | 8.81 E+5   | 1.89 E+6               | -1.0994              | 21.4010   | Y |
| PGN1093 | PG1145 | <i>hypothetical protein PG_1304</i>                    |           |            |                        |                      |            |                              |  |         |           |            |                        |                      |           |   |
| PG1305  |        | 2.13 E-1                                               | 426.1     | 471        | -0.1445                | 9.8091               | Y          |                              |  | G       | 1.2 E-5   | 3.84 E+8   | 5.51 E+8               | -0.5220              | 29.7992   | G |
| PGN1094 | PG1146 | <i>gcvP glycine cleavage system P protein</i>          |           |            |                        |                      |            |                              |  |         |           |            |                        |                      |           |   |
| PG1306  |        | 3.85 E-1                                               | 5.1       | 2.5        | 1.0381                 | 2.9324               | Y          |                              |  | R       | 6.7 E-6   | 3.58 E+6   | 1.06 E+6               | 1.7588               | 22.1431   | R |
| PGN1095 | PG1147 | <i>metallo-beta-lactamase family protein</i>           |           |            |                        |                      |            |                              |  |         |           |            |                        |                      |           |   |
| PG1307  |        | 1.32 E-1                                               | 7.7       | 16.5       | -1.0994                | 4.5970               | Y          |                              |  | Y       | 1.42 E-1  | 2.43 E+6   | 2.09 E+6               | 0.2192               | 22.1090   | Y |
| PGN1096 | PG1148 | <i>gidB glucose-inhibited division protein B</i>       |           |            |                        |                      |            |                              |  |         |           |            |                        |                      |           |   |
| PG1308  |        | 2.74 E-1                                               | 10.3      | 17         | -0.7274                | 4.7691               | Y          |                              |  | G       | 5.03 E-5  | 2.24 E+6   | 5.9 E+6                | -1.3945              | 22.9564   | G |
| PGN1097 | PG1149 | <i>hypothetical protein PG_1308</i>                    |           |            |                        |                      |            |                              |  |         |           |            |                        |                      |           |   |
| PG1310  |        | 2 E-1                                                  | 4.3       | 10         | -1.2249                | 3.8357               | Y          |                              |  | Y       | 1.12 E-1  | 1.29 E+6   | 1.48 E+6               | -0.1998              | 21.4041   | Y |
| PGN1098 | PG1150 | <i>exsB protein</i>                                    |           |            |                        |                      |            |                              |  |         |           |            |                        |                      |           |   |
| PG1311  |        | 2.22 E-2                                               | 1.7       | 10.5       | -2.6172                | 3.6101               | Y          |                              |  | G       | 6.39 E-8  | 2.85 E+5   | 1.2 E+6                | -2.0783              | 20.5063   | G |
| PGN1099 | PG1151 | <i>conserved hypothetical protein</i>                  |           |            |                        |                      |            |                              |  |         |           |            |                        |                      |           |   |

| TIGR    |        | PP PPC / Pg Spectral Count                                     |           |            |                        |                      |            | PP PPC/ Pg Protein Intensity |  |         |           |            |                        | 33277                |           |   |
|---------|--------|----------------------------------------------------------------|-----------|------------|------------------------|----------------------|------------|------------------------------|--|---------|-----------|------------|------------------------|----------------------|-----------|---|
| PGN     | LANL   | q-value                                                        | PP (Norm) | PPC (Norm) | log <sub>2</sub> Ratio | log <sub>2</sub> Sum | Regulation |                              |  | q-value | PP (Norm) | PPC (Norm) | log <sub>2</sub> Ratio | log <sub>2</sub> Sum | Consensus |   |
| PG1312  |        | 3.05 E-1                                                       | 3.4       | 1          | 1.7751                 | 2.1449               | Y          |                              |  | R       | 0         | 9.18 E+5   | 1 E+3                  | 9.8416               | 19.8090   | R |
| PGN1100 | PG1152 | <i>capA protein putative</i>                                   |           |            |                        |                      |            |                              |  |         |           |            |                        |                      |           |   |
| PG1313  |        | 5.73 E-5                                                       | 110.4     | 54         | 1.0314                 | 7.3609               | R          |                              |  | R       | 5.24 E-11 | 8.82 E+7   | 4.23 E+7               | 1.0606               | 26.9594   | R |
| PGN1103 | PG1153 | <i>dipeptidase-related protein</i>                             |           |            |                        |                      |            |                              |  |         |           |            |                        |                      |           |   |
| PG1315  |        | 6.56 E-1                                                       | 33.4      | 35.5       | -0.0892                | 6.1058               | Y          |                              |  | Y       | 1.71 E-1  | 2.64 E+7   | 2.78 E+7               | -0.0751              | 25.6905   | Y |
| PGN1105 | PG1155 | <i>slyD peptidyl-prolyl cis-trans isomerase SlyD FKBP-type</i> |           |            |                        |                      |            |                              |  |         |           |            |                        |                      |           |   |
| PG1321  |        | 1.85 E-1                                                       | 185.7     | 217.5      | -0.2282                | 8.6553               | Y          |                              |  | Y       | 1.17 E-3  | 6.51 E+7   | 1.02 E+8               | -0.6491              | 27.3166   | Y |
| PGN1111 | PG1160 | <i>fhs formate--tetrahydrofolate ligase</i>                    |           |            |                        |                      |            |                              |  |         |           |            |                        |                      |           |   |
| PG1323  |        | 2.18 E-7                                                       | 40.2      | 5          | 3.0078                 | 5.4988               | R          |                              |  | R       | 0         | 2.18 E+7   | 2.58 E+6               | 3.0811               | 24.5422   | R |
| PGN1112 | PG1161 | <i>PhoH family protein</i>                                     |           |            |                        |                      |            |                              |  |         |           |            |                        |                      |           |   |
| PG1324  |        | 6.69 E-1                                                       | 1.7       | 2          | -0.2249                | 1.8919               | Y          |                              |  | G       | 5.04 E-6  | 1.85 E+3   | 5.38 E+5               | -8.1826              | 19.0413   | G |
| PGN1113 | PG1162 | <i>ruvC crossover junction endodeoxyribonuclease RuvC</i>      |           |            |                        |                      |            |                              |  |         |           |            |                        |                      |           |   |
| PG1325  |        | 6.69 E-1                                                       | 2.6       | 3          | -0.2249                | 2.4769               | Y          |                              |  | Y       | 5.31 E-2  | 3.18 E+5   | 1.12 E+6               | -1.8196              | 20.4582   | Y |
| PGN1114 | PG1163 | <i>hypothetical protein PG_1325</i>                            |           |            |                        |                      |            |                              |  |         |           |            |                        |                      |           |   |
| PG1326  |        | 8.79 E-2                                                       | 6.8       | 16.5       | -1.2693                | 4.5451               | Y          |                              |  | Y       | 1.67 E-3  | 2.97 E+6   | 6.31 E+6               | -1.0867              | 23.1469   | Y |
| PGN1115 | PG1164 | <i>hemagglutinin putative</i>                                  |           |            |                        |                      |            |                              |  |         |           |            |                        |                      |           |   |
| PG1327  |        | 3.49 E-1                                                       | 220.8     | 244        | -0.1444                | 8.8603               | Y          |                              |  | G       | 3.09 E-6  | 1.56 E+8   | 2.76 E+8               | -0.8260              | 28.6874   | G |
| PGN1116 | PG1165 | <i>aminotransferase putative</i>                               |           |            |                        |                      |            |                              |  |         |           |            |                        |                      |           |   |
| PG1328  |        | 3.06 E-9                                                       | 146.3     | 57.5       | 1.3475                 | 7.6711               | R          |                              |  | R       | 0         | 1.36 E+8   | 5.13 E+7               | 1.4108               | 27.4836   | R |
| PGN1117 | PG1166 | <i>CoA ligase family protein</i>                               |           |            |                        |                      |            |                              |  |         |           |            |                        |                      |           |   |
| PG1330  |        | 1.04 E-4                                                       | 5.1       | 29         | -2.4979                | 5.0931               | G          |                              |  | G       | 4.27 E-5  | 2.87 E+6   | 1.26 E+7               | -2.1276              | 23.8790   | G |
| PGN1119 | PG1167 | <i>mscL large conductance mechanosensitive channel protein</i> |           |            |                        |                      |            |                              |  |         |           |            |                        |                      |           |   |
| PGN1120 |        | 2.77 E-3                                                       | 722.2     | 599        | 0.2698                 | 10.3676              | R          |                              |  | Y       | 5.43 E-2  | 9.62 E+8   | 8.59 E+8               | 0.1636               | 30.7617   | R |
| PG1332  |        | 5.2 E-1                                                        | 20.5      | 24.5       | -0.2547                | 5.4930               | Y          |                              |  | Y       | 7.14 E-3  | 1.94 E+7   | 4.07 E+7               | -1.0657              | 25.8420   | Y |
| PGN1122 | PG1170 | <i>pntB NAD(P) transhydrogenase beta subunit</i>               |           |            |                        |                      |            |                              |  |         |           |            |                        |                      |           |   |
| PG1333  |        | 9.48 E-2                                                       | 1.7       | 7.5        | -2.1318                | 3.2034               | Y          |                              |  | G       | 3.65 E-10 | 1.85 E+3   | 1.33 E+6               | -9.4908              | 20.3465   | G |
| PGN1123 | PG1171 | <i>hypothetical protein PG_1333</i>                            |           |            |                        |                      |            |                              |  |         |           |            |                        |                      |           |   |
| PG1334  |        | 1.47 E-2                                                       | 63.3      | 35.5       | 0.8348                 | 6.6267               | Y          |                              |  | R       | 5.29 E-7  | 3.86 E+7   | 1.96 E+7               | 0.9766               | 25.7936   | R |
| PGN1124 | PG1172 | <i>band 7/Mec-2 family protein</i>                             |           |            |                        |                      |            |                              |  |         |           |            |                        |                      |           |   |
| PG1335  |        | 1.6 E-1                                                        | 11.1      | 20.5       | -0.8820                | 4.9829               | Y          |                              |  | Y       | 1.38 E-2  | 7.71 E+6   | 1.47 E+7               | -0.9343              | 24.4190   | Y |
| PGN1125 | PG1173 | <i>membrane protein putative</i>                               |           |            |                        |                      |            |                              |  |         |           |            |                        |                      |           |   |
| PG1340  |        | 3.82 E-1                                                       | 1.7       | 4          | -1.2249                | 2.5138               | Y          |                              |  | Y       | 3.09 E-3  | 1.85 E+3   | 8.35 E+5               | -8.8175              | 19.6744   | Y |
| PGN1128 | PG1176 | <i>L-lactate permease</i>                                      |           |            |                        |                      |            |                              |  |         |           |            |                        |                      |           |   |

| TIGR    |        | PP PPC / Pg Spectral Count                                 |           |            |                        |                      |            | PP PPC/ Pg Protein Intensity |  |         |           |            |                        | 33277                |           |   |
|---------|--------|------------------------------------------------------------|-----------|------------|------------------------|----------------------|------------|------------------------------|--|---------|-----------|------------|------------------------|----------------------|-----------|---|
| PGN     | LANL   | q-value                                                    | PP (Norm) | PPC (Norm) | log <sub>2</sub> Ratio | log <sub>2</sub> Sum | Regulation |                              |  | q-value | PP (Norm) | PPC (Norm) | log <sub>2</sub> Ratio | log <sub>2</sub> Sum | Consensus |   |
| PG1341  |        | 1.32 E-10                                                  | 109.5     | 31         | 1.8209                 | 7.1347               | R          |                              |  | R       | 4.37 E-15 | 2.21 E+8   | 5.72 E+7               | 1.9481               | 28.0508   | R |
| PGN1129 | PG1177 | <i>hypothetical protein PG_1341</i>                        |           |            |                        |                      |            |                              |  |         |           |            |                        |                      |           |   |
| PG1342  |        | 5.43 E-1                                                   | 2.6       | 1.5        | 0.7751                 | 2.0240               | Y          |                              |  | R       | 0         | 1.03 E+6   | 2.18 E+5               | 2.2357               | 20.2453   | R |
| PGN1130 | PG1178 | <i>murB UDP-N-acetylenolpyruvoylglucosamine reductase</i>  |           |            |                        |                      |            |                              |  |         |           |            |                        |                      |           |   |
| PG1343  |        | 1.5 E-1                                                    | 1.7       | 6.5        | -1.9253                | 3.0376               | Y          |                              |  | G       | 6.34 E-7  | 1.85 E+3   | 7.6 E+5                | -8.6812              | 19.5384   | G |
| PGN1131 | PG1179 | <i>lipB lipoate-protein ligase B</i>                       |           |            |                        |                      |            |                              |  |         |           |            |                        |                      |           |   |
| PG1345  |        | 7.79 E-2                                                   | 6.0       | 15.5       | -1.3717                | 4.4256               | Y          |                              |  | Y       | 2.15 E-2  | 1.07 E+6   | 3.06 E+6               | -1.5140              | 21.9772   | Y |
| PGN1134 | PG1180 | <i>glycosyl transferase group 1 family protein</i>         |           |            |                        |                      |            |                              |  |         |           |            |                        |                      |           |   |
| PG1346  |        | 6.7 E-1                                                    | 5.1       | 5.5        | -0.0994                | 3.4106               | Y          |                              |  | Y       | 1.49 E-2  | 1.24 E+6   | 7.45 E+5               | 0.7384               | 20.9228   | Y |
| PGN1135 | PG1181 | <i>glycosyl transferase group 1 family protein</i>         |           |            |                        |                      |            |                              |  |         |           |            |                        |                      |           |   |
| PG1347  |        | 5.77 E-2                                                   | 5.1       | 15         | -1.5468                | 4.3316               | Y          |                              |  | G       | 3.6 E-4   | 2.13 E+6   | 6.87 E+6               | -1.6882              | 23.1016   | G |
| PGN1136 | PG1182 | <i>conserved hypothetical protein</i>                      |           |            |                        |                      |            |                              |  |         |           |            |                        |                      |           |   |
| PG1348  |        | 1.56 E-1                                                   | 6.0       | 1.5        | 1.9975                 | 2.9049               | Y          |                              |  | Y       | 5.04 E-2  | 2.14 E+6   | 2.51 E+6               | -0.2343              | 22.1478   | Y |
| PGN1137 | PG1183 | <i>conserved hypothetical protein TIGR00147</i>            |           |            |                        |                      |            |                              |  |         |           |            |                        |                      |           |   |
| PG1351  |        | 6 E-1                                                      | 1.7       | 2.5        | -0.5468                | 2.0743               | Y          |                              |  | G       | 2.33 E-4  | 1.85 E+3   | 1.4 E+6                | -9.5583              | 20.4139   | G |
| PGN1138 | PG1186 | <i>hypothetical protein PG_1351</i>                        |           |            |                        |                      |            |                              |  |         |           |            |                        |                      |           |   |
| PG1352  |        | 4.1 E-2                                                    | 21.4      | 8.5        | 1.3315                 | 4.9017               | Y          |                              |  | R       | 8.92 E-4  | 1.35 E+7   | 5.97 E+6               | 1.1790               | 24.2162   | R |
| PGN1139 | PG1187 | <i>hypothetical protein PG_1352</i>                        |           |            |                        |                      |            |                              |  |         |           |            |                        |                      |           |   |
| PG1353  |        | 3.11 E-2                                                   | 65.0      | 39.5       | 0.7192                 | 6.7078               | Y          |                              |  | R       | 2.33 E-4  | 4.19 E+7   | 2.41 E+7               | 0.8012               | 25.9757   | R |
| PGN1140 | PG1188 | <i>pyrE orotate phosphoribosyltransferase</i>              |           |            |                        |                      |            |                              |  |         |           |            |                        |                      |           |   |
| PG1354  |        | 2.25 E-1                                                   | 1.7       | 5.5        | -1.6843                | 2.8503               | Y          |                              |  | Y       | 8.62 E-3  | 1.85 E+3   | 1.06 E+6               | -9.1576              | 20.0138   | Y |
| PGN1141 | PG1189 | <i>hydrolase carbon-nitrogen family</i>                    |           |            |                        |                      |            |                              |  |         |           |            |                        |                      |           |   |
| PG1356  |        | 2.99 E-1                                                   | 38.5      | 50         | -0.3769                | 6.4677               | Y          |                              |  | Y       | 3.49 E-3  | 3 E+7      | 1.71 E+7               | 0.8125               | 25.4882   | Y |
| PGN1143 | PG1191 | <i>hypothetical protein PG_1356</i>                        |           |            |                        |                      |            |                              |  |         |           |            |                        |                      |           |   |
| PG1360  |        | 6 E-1                                                      | 62.5      | 67         | -0.1012                | 7.0164               | Y          |                              |  | Y       | 1.11 E-2  | 3.94 E+7   | 5.05 E+7               | -0.3593              | 26.4222   | Y |
| PGN1148 | PG1195 | <i>purD phosphoribosylamine--glycine ligase</i>            |           |            |                        |                      |            |                              |  |         |           |            |                        |                      |           |   |
| PG1361  |        | 3.21 E-1                                                   | 111.2     | 129        | -0.2138                | 7.9083               | Y          |                              |  | Y       | 2.21 E-3  | 6.9 E+7    | 9.21 E+7               | -0.4154              | 27.2637   | Y |
| PGN1149 | PG1196 | <i>dipeptidyl aminopeptidase IV putative</i>               |           |            |                        |                      |            |                              |  |         |           |            |                        |                      |           |   |
| PG1362  |        | 6.69 E-1                                                   | 6.8       | 7.5        | -0.1318                | 3.8425               | Y          |                              |  | R       | 2.6 E-7   | 4.57 E+6   | 9.76 E+5               | 2.2270               | 22.4031   | Y |
| PGN1150 | PG1197 | <i>conserved hypothetical protein</i>                      |           |            |                        |                      |            |                              |  |         |           |            |                        |                      |           |   |
| PG1364  |        | 4.4 E-1                                                    | 5.1       | 8          | -0.6399                | 3.7152               | Y          |                              |  | Y       | 1.15 E-1  | 1.39 E+6   | 1.76 E+6               | -0.3372              | 21.5856   | Y |
| PGN1151 | PG1199 | <i>dxr 1-deoxy-D-xylulose 5-phosphate reductoisomerase</i> |           |            |                        |                      |            |                              |  |         |           |            |                        |                      |           |   |
| PG1365  |        | 3.21 E-1                                                   | 1.7       | 4.5        | -1.3948                | 2.6349               | Y          |                              |  | G       | 1.22 E-6  | 1.85 E+3   | 6.23 E+5               | -8.3956              | 19.2536   | G |
| PGN1152 | PG1200 | <i>16S rRNA processing protein RimM putative</i>           |           |            |                        |                      |            |                              |  |         |           |            |                        |                      |           |   |

| TIGR    |        | PP PPC / Pg Spectral Count                                    |           |            |                        |                      |            | PP PPC/ Pg Protein Intensity |  |         |           |            |                        | 33277                |           |   |
|---------|--------|---------------------------------------------------------------|-----------|------------|------------------------|----------------------|------------|------------------------------|--|---------|-----------|------------|------------------------|----------------------|-----------|---|
| PGN     | LANL   | q-value                                                       | PP (Norm) | PPC (Norm) | log <sub>2</sub> Ratio | log <sub>2</sub> Sum | Regulation |                              |  | q-value | PP (Norm) | PPC (Norm) | log <sub>2</sub> Ratio | log <sub>2</sub> Sum | Consensus |   |
| PG1366  |        | 4.41 E-1                                                      | 34.2      | 28         | 0.2897                 | 5.9594               | Y          |                              |  | Y       | 1.66 E-1  | 1.93 E+7   | 2.01 E+7               | -0.0608              | 25.2293   | Y |
| PGN1153 | PG1201 | <i>murA UDP-N-acetylglucosamine 1-carboxyvinyltransferase</i> |           |            |                        |                      |            |                              |  |         |           |            |                        |                      |           |   |
| PG1367  |        | 2.27 E-2                                                      | 18.0      | 5.5        | 1.7080                 | 4.5527               | Y          |                              |  | R       | 2.66 E-6  | 6.74 E+6   | 1.1 E+6                | 2.6099               | 22.9034   | R |
| PGN1154 | PG1202 | <i>hypothetical protein PG_1367</i>                           |           |            |                        |                      |            |                              |  |         |           |            |                        |                      |           |   |
| PG1368  |        | 6.54 E-1                                                      | 34.2      | 36.5       | -0.0928                | 6.1442               | Y          |                              |  | Y       | 2.82 E-3  | 9.17 E+6   | 1.32 E+7               | -0.5255              | 24.4148   | Y |
| PGN1155 | PG1203 | <i>pgi glucose-6-phosphate isomerase</i>                      |           |            |                        |                      |            |                              |  |         |           |            |                        |                      |           |   |
| PG1369  |        | 3.76 E-1                                                      | 6.0       | 3          | 0.9975                 | 3.1683               | Y          |                              |  | G       | 0         | 1.86 E+6   | 3.18 E+6               | -0.7727              | 22.2636   | Y |
| PGN1156 | PG1204 | <i>gpsA glycerol-3-phosphate dehydrogenase (NAD(P)+)</i>      |           |            |                        |                      |            |                              |  |         |           |            |                        |                      |           |   |
| PG1370  |        | 1.88 E-1                                                      | 54.8      | 72.5       | -0.4048                | 6.9917               | Y          |                              |  | G       | 5.47 E-4  | 2.92 E+7   | 5.15 E+7               | -0.8196              | 26.2649   | G |
| PGN1157 | PG1205 | <i>lysS lysyl-tRNA synthetase</i>                             |           |            |                        |                      |            |                              |  |         |           |            |                        |                      |           |   |
| PG1371  |        | 7.24 E-2                                                      | 47.1      | 70         | -0.5728                | 6.8711               | Y          |                              |  | Y       | 1.48 E-1  | 1.71 E+7   | 1.82 E+7               | -0.0900              | 25.0748   | Y |
| PGN1158 | PG1206 | <i>phosphorylase family protein</i>                           |           |            |                        |                      |            |                              |  |         |           |            |                        |                      |           |   |
| PG1372  |        | 2.67 E-1                                                      | 9.4       | 4.5        | 1.0646                 | 3.7983               | Y          |                              |  | R       | 1.67 E-4  | 6.14 E+6   | 2.13 E+6               | 1.5305               | 22.9797   | R |
| PGN1159 | PG1207 | <i>hypothetical protein PG_1372</i>                           |           |            |                        |                      |            |                              |  |         |           |            |                        |                      |           |   |
| PG1066  |        | 5.36 E-1                                                      | 24.8      | 21         | 0.2408                 | 5.5177               | Y          |                              |  | Y       | 9.62 E-2  | 3.47 E+7   | 4.06 E+7               | -0.2267              | 26.1644   | Y |
| PGN1162 | PG0948 | <i>ctfA butyrate-acetoacetate CoA-transferase subunit A</i>   |           |            |                        |                      |            |                              |  |         |           |            |                        |                      |           |   |
| PG1067  |        | 3.99 E-1                                                      | 20.5      | 15         | 0.4532                 | 5.1512               | Y          |                              |  | Y       | 1.6 E-1   | 1.52 E+7   | 1.42 E+7               | 0.0997               | 24.8099   | Y |
| PGN1163 | PG0949 | <i>conserved hypothetical protein</i>                         |           |            |                        |                      |            |                              |  |         |           |            |                        |                      |           |   |
| PG1068  |        | 3.82 E-1                                                      | 80.4      | 93.5       | -0.2172                | 7.4424               | Y          |                              |  | G       | 3.58 E-5  | 3.88 E+7   | 7.33 E+7               | -0.9195              | 26.7405   | G |
| PGN1164 | PG0950 | <i>conserved hypothetical protein</i>                         |           |            |                        |                      |            |                              |  |         |           |            |                        |                      |           |   |
| PG1069  |        | 2.18 E-7                                                      | 111.2     | 43         | 1.3712                 | 7.2690               | R          |                              |  | R       | 1.11 E-12 | 7.63 E+7   | 2.82 E+7               | 1.4337               | 26.6393   | R |
| PGN1165 | PG0951 | <i>alcohol dehydrogenase zinc-containing putative</i>         |           |            |                        |                      |            |                              |  |         |           |            |                        |                      |           |   |
| PG1070  |        | 6.69 E-1                                                      | 33.4      | 35         | -0.0688                | 6.0953               | Y          |                              |  | Y       | 1.13 E-1  | 1.31 E+7   | 1.73 E+7               | -0.4076              | 24.8572   | Y |
| PGN1166 | PG0952 | <i>kamA L-lysine 23-aminomutase</i>                           |           |            |                        |                      |            |                              |  |         |           |            |                        |                      |           |   |
| PG1071  |        | 6.69 E-1                                                      | 1.7       | 1.5        | 0.1901                 | 1.6832               | Y          |                              |  | G       | 0         | 4.51 E+5   | 5.38 E+5               | -0.2553              | 19.9161   | Y |
| PGN1167 | PG0953 | <i>conserved hypothetical protein</i>                         |           |            |                        |                      |            |                              |  |         |           |            |                        |                      |           |   |
| PG1072  |        | 6.69 E-1                                                      | 1.7       | 1.5        | 0.1901                 | 1.6832               | Y          |                              |  | G       | 0         | 1.85 E+3   | 1.1 E+5                | -5.8885              | 16.7663   | Y |
| PGN1168 | PG0954 | <i>MutS family protein</i>                                    |           |            |                        |                      |            |                              |  |         |           |            |                        |                      |           |   |
| PG1073  |        | 5.77 E-2                                                      | 8.6       | 20.5       | -1.2605                | 4.8608               | Y          |                              |  | Y       | 3.32 E-3  | 5.91 E+6   | 9.76 E+6               | -0.7246              | 23.9019   | Y |
| PGN1169 | PG0955 | <i>kamD D-lysine 56-aminomutase alpha subunit</i>             |           |            |                        |                      |            |                              |  |         |           |            |                        |                      |           |   |
| PG1074  |        | 6.64 E-1                                                      | 13.7      | 12.5       | 0.1312                 | 4.7110               | Y          |                              |  | Y       | 5.2 E-2   | 5.22 E+6   | 7.11 E+6               | -0.4448              | 23.5562   | Y |
| PGN1170 | PG0956 | <i>kamE D-lysine 56-aminomutase beta subunit</i>              |           |            |                        |                      |            |                              |  |         |           |            |                        |                      |           |   |
| PG1075  |        | 3.93 E-1                                                      | 10.3      | 15         | -0.5468                | 4.6592               | Y          |                              |  | Y       | 3.48 E-3  | 6.92 E+6   | 1.17 E+7               | -0.7557              | 24.1498   | Y |
| PGN1171 | PG0957 | <i>coenzyme A transferase beta subunit</i>                    |           |            |                        |                      |            |                              |  |         |           |            |                        |                      |           |   |

| TIGR    |        | PP PPC / Pg Spectral Count                                 |           |            |                        |                      |            | PP PPC/ Pg Protein Intensity |  |         |           |            |                        | 33277                |           |   |
|---------|--------|------------------------------------------------------------|-----------|------------|------------------------|----------------------|------------|------------------------------|--|---------|-----------|------------|------------------------|----------------------|-----------|---|
| PGN     | LANL   | q-value                                                    | PP (Norm) | PPC (Norm) | log <sub>2</sub> Ratio | log <sub>2</sub> Sum | Regulation |                              |  | q-value | PP (Norm) | PPC (Norm) | log <sub>2</sub> Ratio | log <sub>2</sub> Sum | Consensus |   |
| PG1076  |        | 3.14 E-4                                                   | 397.9     | 519        | -0.3834                | 9.8406               | G          |                              |  | Y       | 4.32 E-3  | 2.66 E+8   | 3.44 E+8               | -0.3717              | 29.1853   | G |
| PGN1172 | PG0958 | <i>acdA acyl-CoA dehydrogenase short-chain specific</i>    |           |            |                        |                      |            |                              |  |         |           |            |                        |                      |           |   |
| PG1077  |        | 1.72 E-2                                                   | 338.0     | 413.5      | -0.2909                | 9.5536               | Y          |                              |  | Y       | 5.28 E-2  | 3.16 E+8   | 3.78 E+8               | -0.2591              | 29.3706   | Y |
| PGN1173 | PG0959 | <i>etfB-2 electron transfer flavoprotein beta subunit</i>  |           |            |                        |                      |            |                              |  |         |           |            |                        |                      |           |   |
| PG1078  |        | 6.74 E-1                                                   | 611.8     | 615.5      | -0.0087                | 10.2613              | Y          |                              |  | Y       | 3.13 E-2  | 3.45 E+8   | 3.13 E+8               | 0.1433               | 29.2933   | Y |
| PGN1174 | PG0960 | <i>etfA-2 electron transfer flavoprotein alpha subunit</i> |           |            |                        |                      |            |                              |  |         |           |            |                        |                      |           |   |
| PG1079  |        | 4.02 E-1                                                   | 24.0      | 18         | 0.4125                 | 5.3909               | Y          |                              |  | Y       | 1.62 E-1  | 1.7 E+7    | 1.82 E+7               | -0.0919              | 25.0691   | Y |
| PGN1175 | PG0961 | <i>enoyl-CoA hydratase/isomerase family protein</i>        |           |            |                        |                      |            |                              |  |         |           |            |                        |                      |           |   |
| PG1080  |        | 4.82 E-1                                                   | 46.2      | 53         | -0.1979                | 6.6323               | Y          |                              |  | Y       | 2.1 E-2   | 3.14 E+7   | 4.96 E+7               | -0.6595              | 26.2719   | Y |
| PGN1176 | PG0962 | <i>3-hydroxyacyl-CoA dehydrogenase family protein</i>      |           |            |                        |                      |            |                              |  |         |           |            |                        |                      |           |   |
| PG1081  |        | 2.7 E-1                                                    | 99.3      | 81.5       | 0.2843                 | 7.4979               | Y          |                              |  | Y       | 1.46 E-1  | 6.37 E+7   | 6.02 E+7               | 0.0827               | 26.8843   | Y |
| PGN1178 | PG0963 | <i>ackA acetate kinase</i>                                 |           |            |                        |                      |            |                              |  |         |           |            |                        |                      |           |   |
| PG1082  |        | 0                                                          | 274.7     | 62         | 2.1473                 | 8.3952               | R          |                              |  | R       | 5.28 E-12 | 2.24 E+8   | 8.88 E+7               | 1.3337               | 28.2202   | R |
| PGN1179 | PG0964 | <i>pta phosphotransacetylase</i>                           |           |            |                        |                      |            |                              |  |         |           |            |                        |                      |           |   |
| PG1083  |        | 6.69 E-1                                                   | 1.7       | 2          | -0.2249                | 1.8919               | Y          |                              |  | G       | 0         | 1.85 E+3   | 2.26 E+6               | -10.2524             | 21.1072   | G |
| PGN1180 | PG0965 | <i>hypothetical protein PG_1083</i>                        |           |            |                        |                      |            |                              |  |         |           |            |                        |                      |           |   |
| PG1084  |        | 3.36 E-2                                                   | 251.6     | 199        | 0.3381                 | 8.8156               | Y          |                              |  | R       | 3.22 E-15 | 3.07 E+8   | 1.4 E+8                | 1.1329               | 28.7368   | R |
| PGN1181 | PG0966 | <i>thioredoxin family protein</i>                          |           |            |                        |                      |            |                              |  |         |           |            |                        |                      |           |   |
| PG1085  |        | 1.18 E-9                                                   | 70.2      | 13.5       | 2.3778                 | 6.3865               | R          |                              |  | R       | 3.48 E-4  | 1.78 E+8   | 7.21 E+7               | 1.3031               | 27.8982   | R |
| PGN1182 | PG0967 | <i>hypothetical protein PG_1085</i>                        |           |            |                        |                      |            |                              |  |         |           |            |                        |                      |           |   |
| PG1087  |        | 6.69 E-1                                                   | 3.4       | 4          | -0.2249                | 2.8919               | Y          |                              |  | Y       | 1.87 E-1  | 7.01 E+5   | 7.16 E+5               | -0.0302              | 20.4346   | Y |
| PGN1184 | PG0968 | <i>radical SAM protein TIGR01212 family</i>                |           |            |                        |                      |            |                              |  |         |           |            |                        |                      |           |   |
| PG1089  |        | 9.91 E-3                                                   | 61.6      | 33         | 0.9006                 | 6.5639               | R          |                              |  | R       | 5.67 E-4  | 3.62 E+7   | 2.21 E+7               | 0.7135               | 25.7961   | R |
| PGN1186 | PG0970 | <i>rprY DNA-binding response regulator RprY</i>            |           |            |                        |                      |            |                              |  |         |           |            |                        |                      |           |   |
| PG1091  |        | 2.74 E-1                                                   | 15.4      | 9          | 0.7751                 | 4.6089               | Y          |                              |  | Y       | 2.95 E-2  | 2.64 E+6   | 4.12 E+6               | -0.6404              | 22.6897   | Y |
| PGN1187 | PG0971 | <i>DHH subfamily 1 protein</i>                             |           |            |                        |                      |            |                              |  |         |           |            |                        |                      |           |   |
| PG1093  |        | 5.46 E-4                                                   | 8.6       | 32.5       | -1.9253                | 5.3595               | G          |                              |  | G       | 2.22 E-5  | 6.73 E+6   | 2.11 E+7               | -1.6508              | 24.7311   | G |
| PGN1188 | PG0972 | <i>hypothetical protein PG_1093</i>                        |           |            |                        |                      |            |                              |  |         |           |            |                        |                      |           |   |
| PG1094  |        | 1.62 E-1                                                   | 65.0      | 85.5       | -0.3948                | 7.2339               | Y          |                              |  | Y       | 1.98 E-2  | 4.29 E+7   | 5.78 E+7               | -0.4291              | 26.5864   | Y |
| PGN1189 | PG0973 | <i>pgm phosphomannomutase</i>                              |           |            |                        |                      |            |                              |  |         |           |            |                        |                      |           |   |
| PG1095  |        | 3.64 E-1                                                   | 14.5      | 9.5        | 0.6146                 | 4.5877               | Y          |                              |  | Y       | 4.25 E-3  | 3.15 E+6   | 1.75 E+6               | 0.8447               | 22.2239   | Y |
| PGN1190 | PG0974 | <i>RNA methyltransferase TrmA family</i>                   |           |            |                        |                      |            |                              |  |         |           |            |                        |                      |           |   |
| PG1096  |        | 6.49 E-1                                                   | 4.3       | 3.5        | 0.2897                 | 2.9594               | Y          |                              |  | Y       | 1.4 E-1   | 6.49 E+5   | 8.48 E+5               | -0.3846              | 20.5140   | Y |
| PGN1193 | PG0975 | <i>hypothetical protein PG_1096</i>                        |           |            |                        |                      |            |                              |  |         |           |            |                        |                      |           |   |

| TIGR    |        | PP PPC / Pg Spectral Count                                                                     |           |            |                        |                      |            | PP PPC/ Pg Protein Intensity |           |            |                        |                      |           | 33277 |
|---------|--------|------------------------------------------------------------------------------------------------|-----------|------------|------------------------|----------------------|------------|------------------------------|-----------|------------|------------------------|----------------------|-----------|-------|
| PGN     | LANL   | q-value                                                                                        | PP (Norm) | PPC (Norm) | log <sub>2</sub> Ratio | log <sub>2</sub> Sum | Regulation | q-value                      | PP (Norm) | PPC (Norm) | log <sub>2</sub> Ratio | log <sub>2</sub> Sum | Consensus |       |
| PG1097  |        | 4.4 E-1                                                                                        | 5.1       | 8          | -0.6399                | 3.7152               | Y ●● Y     | 4.36 E-2                     | 9.17 E+5  | 1.45 E+6   | -0.6611                | 21.1750              | Y ●       |       |
| PGN1194 | PG0976 | <i>Mur ligase domain protein/alanine racemase</i>                                              |           |            |                        |                      |            |                              |           |            |                        |                      |           |       |
| PG1098  |        | 4.65 E-1                                                                                       | 2.6       | 4.5        | -0.8099                | 2.8211               | Y ●● Y     | 1.32 E-3                     | 2.3 E+5   | 1.88 E+5   | 0.2896                 | 18.6758              | Y ●       |       |
| PGN1195 | PG0977 | <i>hypothetical protein PG_1098</i>                                                            |           |            |                        |                      |            |                              |           |            |                        |                      |           |       |
| PG1100  |        | 6.69 E-1                                                                                       | 1.7       | 2          | -0.2249                | 1.8919               | Y ●● G     | 0                            | 1.85 E+3  | 1.06 E+6   | -9.1593                | 20.0156              | G ●       |       |
| PGN1197 | PG0979 | <i>hypothetical protein PG_1100</i>                                                            |           |            |                        |                      |            |                              |           |            |                        |                      |           |       |
| PG1497  |        | 6.69 E-1                                                                                       | 3.4       | 4          | -0.2249                | 2.8919               | Y ●● Y     | 5.33 E-2                     | 5.54 E+5  | 4.67 E+5   | 0.2458                 | 19.9622              | Y ●       |       |
| PGN1199 | PG1312 | <i>DNA-binding protein histone-like family</i>                                                 |           |            |                        |                      |            |                              |           |            |                        |                      |           |       |
| PG1103  |        | 6.64 E-1                                                                                       | 6.8       | 6          | 0.1901                 | 3.6832               | Y ●● Y     | 1.5 E-1                      | 2.55 E+6  | 2.25 E+6   | 0.1824                 | 22.1952              | Y ●       |       |
| PGN1200 | PG0982 | <i>ATPase AAA family</i>                                                                       |           |            |                        |                      |            |                              |           |            |                        |                      |           |       |
| PG1105  |        | 4.4 E-1                                                                                        | 1.7       | 3.5        | -1.0323                | 2.3816               | Y ●● Y     | 6.1 E-3                      | 1.85 E+3  | 7.49 E+5   | -8.6617                | 19.5190              | Y ●       |       |
| PGN1202 | PG0984 | <i>rpoN RNA polymerase sigma-54 factor</i>                                                     |           |            |                        |                      |            |                              |           |            |                        |                      |           |       |
| PG1106  |        | 1.16 E-2                                                                                       | 12.8      | 32         | -1.3180                | 5.4865               | Y ●● Y     | 2.64 E-2                     | 4.09 E+6  | 7.88 E+6   | -0.9459                | 23.5134              | Y ●       |       |
| PGN1203 | PG0985 | <i>murF UDP-N-acetylmuramoylalanyl-D-glutamyl-26-diaminopimelate--D-alanyl-D-alanyl ligase</i> |           |            |                        |                      |            |                              |           |            |                        |                      |           |       |
| PG1114  |        | 4.67 E-3                                                                                       | 1.7       | 13.5       | -2.9798                | 3.9271               | Y ●● Y     | 1.24 E-3                     | 8.71 E+5  | 1.08 E+7   | -3.6359                | 23.4799              | Y ●       |       |
| PGN1204 | PG0995 | <i>panD aspartate-1-decarboxylase</i>                                                          |           |            |                        |                      |            |                              |           |            |                        |                      |           |       |
| PG1115  |        | 6.16 E-4                                                                                       | 41.9      | 14         | 1.5825                 | 5.8055               | R ●● R     | 4.14 E-15                    | 1.84 E+7  | 8.32 E+6   | 1.1470                 | 24.6724              | R ●       |       |
| PGN1205 | PG0996 | <i>ffh signal recognition particle protein</i>                                                 |           |            |                        |                      |            |                              |           |            |                        |                      |           |       |
| PG1116  |        | 2.35 E-10                                                                                      | 118.1     | 36.5       | 1.6938                 | 7.2722               | R ●● R     | 0                            | 8.31 E+7  | 2.37 E+7   | 1.8102                 | 26.6707              | R ●       |       |
| PGN1206 | PG0997 | <i>folD methylenetetrahydrofolate dehydrogenase/methenyltetrahydrofolate cyclohydrolase</i>    |           |            |                        |                      |            |                              |           |            |                        |                      |           |       |
| PG1118  |        | 3.96 E-7                                                                                       | 91.6      | 32         | 1.5166                 | 6.9490               | R ●● R     | 0                            | 3.76 E+7  | 9.97 E+6   | 1.9155                 | 25.5034              | R ●       |       |
| PGN1208 | PG1000 | <i>clpB clpB protein</i>                                                                       |           |            |                        |                      |            |                              |           |            |                        |                      |           |       |
| PG1119  |        | 3.79 E-4                                                                                       | 30.8      | 70         | -1.1843                | 6.6554               | G ●● G     | 4.4 E-5                      | 1.4 E+7   | 4.18 E+7   | -1.5732                | 25.7345              | G ●       |       |
| PGN1209 | PG1001 | <i>flavodoxin putative</i>                                                                     |           |            |                        |                      |            |                              |           |            |                        |                      |           |       |
|         |        | 6.54 E-1                                                                                       | 2.6       | 2          | 0.3601                 | 2.1912               | Y ●● Y     | 8.41 E-2                     | 7.54 E+5  | 5.45 E+5   | 0.4671                 | 20.3091              | Y ●       |       |
| PGN1211 |        |                                                                                                |           |            |                        |                      |            |                              |           |            |                        |                      |           |       |
|         |        | 3.06 E-1                                                                                       | 4.3       | 1.5        | 1.5121                 | 2.5306               | Y ●● R     | 2.58 E-16                    | 5.46 E+5  | 3.96 E+5   | 0.4612                 | 19.8456              | R ●       |       |
| PGN1212 |        |                                                                                                |           |            |                        |                      |            |                              |           |            |                        |                      |           |       |
|         |        | 6.69 E-1                                                                                       | 8.6       | 8          | 0.0970                 | 4.0493               | Y ●● Y     | 1.23 E-2                     | 4.12 E+6  | 2.51 E+6   | 0.7165                 | 22.6608              | Y ●       |       |
| PGN1213 |        |                                                                                                |           |            |                        |                      |            |                              |           |            |                        |                      |           |       |
|         |        | 2.74 E-1                                                                                       | 1.7       | 5          | -1.5468                | 2.7466               | Y ●● Y     | 2.48 E-3                     | 1.85 E+3  | 9.1 E+5    | -8.9420                | 19.7986              | Y ●       |       |
| PGN1214 |        |                                                                                                |           |            |                        |                      |            |                              |           |            |                        |                      |           |       |
| PG1121  |        | 1.76 E-2                                                                                       | 165.1     | 119        | 0.4727                 | 8.1505               | Y ●● Y     | 2.89 E-3                     | 1.17 E+8  | 8.29 E+7   | 0.4924                 | 27.5718              | Y ●       |       |
| PGN1218 | PG1002 | <i>asnS asparaginyl-tRNA synthetase</i>                                                        |           |            |                        |                      |            |                              |           |            |                        |                      |           |       |



| TIGR    |        | PP PPC / Pg Spectral Count                                      |           |            |                        |                      |            | PP PPC/ Pg Protein Intensity |   |         |           |            |                        | 33277                |           |     |
|---------|--------|-----------------------------------------------------------------|-----------|------------|------------------------|----------------------|------------|------------------------------|---|---------|-----------|------------|------------------------|----------------------|-----------|-----|
| PGN     | LANL   | q-value                                                         | PP (Norm) | PPC (Norm) | log <sub>2</sub> Ratio | log <sub>2</sub> Sum | Regulation |                              |   | q-value | PP (Norm) | PPC (Norm) | log <sub>2</sub> Ratio | log <sub>2</sub> Sum | Consensus |     |
| PG1122  |        | 6.02 E-5                                                        | 48.8      | 14.5       | 1.7500                 | 5.9835               | R          | ●                            | ● | R       | 0         | 2.4 E+7    | 3.83 E+6               | 2.6481               | 24.7324   | R ● |
| PGN1219 | PG1003 |                                                                 |           |            |                        |                      |            |                              |   |         |           |            |                        |                      |           |     |
| PG1123  |        | 6.85 E-1                                                        | 98.4      | 99.5       | -0.0160                | 7.6286               | Y          | ●                            | ● | Y       | 1.76 E-2  | 4.94 E+7   | 6.33 E+7               | -0.3562              | 26.7484   | Y ● |
| PGN1220 | PG1004 | <i>purB adenylosuccinate lyase</i>                              |           |            |                        |                      |            |                              |   |         |           |            |                        |                      |           |     |
| PG1124  |        | 2.15 E-1                                                        | 13.7      | 7          | 0.9677                 | 4.3709               | Y          | ●                            | ● | Y       | 6.66 E-2  | 2.05 E+6   | 1.51 E+6               | 0.4482               | 21.7638   | Y ● |
| PGN1221 | PG1005 | <i>ATP:cob(I)alamin adenosyltransferase putative</i>            |           |            |                        |                      |            |                              |   |         |           |            |                        |                      |           |     |
| PG1125  |        | 3.05 E-1                                                        | 3.4       | 1          | 1.7751                 | 2.1449               | Y          | ●                            | ● | R       | 0         | 2.72 E+5   | 1 E+3                  | 8.0880               | 18.0591   | R ● |
| PGN1222 | PG1006 | <i>hypothetical protein PG_1125</i>                             |           |            |                        |                      |            |                              |   |         |           |            |                        |                      |           |     |
| PG1126  |        | 4.75 E-1                                                        | 3.4       | 5.5        | -0.6843                | 3.1575               | Y          | ●                            | ● | Y       | 5.14 E-2  | 1.67 E+6   | 5.12 E+6               | -1.6201              | 22.6948   | Y ● |
| PGN1223 | PG1007 | <i>uraA uracil permease</i>                                     |           |            |                        |                      |            |                              |   |         |           |            |                        |                      |           |     |
| PG1127  |        | 2.15 E-3                                                        | 12.8      | 1          | 3.6820                 | 3.7902               | Y          | ●                            | ● | R       | 0         | 5.27 E+6   | 1 E+3                  | 12.3644              | 22.3305   | R ● |
| PGN1224 | PG1008 | <i>transcriptional regulator AsnC Family</i>                    |           |            |                        |                      |            |                              |   |         |           |            |                        |                      |           |     |
| PG1128  |        | 5.17 E-1                                                        | 1.7       | 3          | -0.8099                | 2.2361               | Y          | ●                            | ● | Y       | 1.29 E-3  | 1.85 E+3   | 4.27 E+5               | -7.8515              | 18.7115   | Y ● |
| PGN1225 | PG1009 | <i>xseA exodeoxyribonuclease VII large subunit</i>              |           |            |                        |                      |            |                              |   |         |           |            |                        |                      |           |     |
| PG1129  |        | 0                                                               | 239.6     | 46         | 2.3808                 | 8.1578               | R          | ●                            | ● | R       | 0         | 9.05 E+7   | 1.88 E+7               | 2.2654               | 26.7041   | R ● |
| PGN1226 | PG1010 | <i>nrd ribonucleotide reductase</i>                             |           |            |                        |                      |            |                              |   |         |           |            |                        |                      |           |     |
| PG1130  |        | 4.23 E-1                                                        | 9.4       | 6          | 0.6496                 | 3.9460               | Y          | ●                            | ● | Y       | 2.51 E-2  | 1.98 E+6   | 1.21 E+6               | 0.7077               | 21.6030   | Y ● |
| PGN1227 | PG1011 | <i>TPR domain protein</i>                                       |           |            |                        |                      |            |                              |   |         |           |            |                        |                      |           |     |
| PG1132  |        | 9.4 E-6                                                         | 99.3      | 42.5       | 1.2237                 | 7.1473               | R          | ●                            | ● | R       | 0         | 7.12 E+7   | 2.26 E+7               | 1.6547               | 26.4842   | R ● |
| PGN1229 | PG1013 | <i>valS valyl-tRNA synthetase</i>                               |           |            |                        |                      |            |                              |   |         |           |            |                        |                      |           |     |
| PG1133  |        | 3.87 E-2                                                        | 7.7       | 1          | 2.9450                 | 3.1212               | Y          | ●                            | ● | R       | 0         | 1.96 E+6   | 1 E+3                  | 10.9386              | 20.9051   | R ● |
| PGN1230 | PG1014 | <i>hypothetical protein PG_1133</i>                             |           |            |                        |                      |            |                              |   |         |           |            |                        |                      |           |     |
| PG1134  |        | 1.27 E-2                                                        | 35.9      | 64.5       | -0.8438                | 6.6502               | Y          | ●                            | ● | Y       | 5.9 E-2   | 3.85 E+7   | 5.29 E+7               | -0.4606              | 26.4456   | Y ● |
| PGN1232 | PG1016 | <i>trxB thioredoxin reductase</i>                               |           |            |                        |                      |            |                              |   |         |           |            |                        |                      |           |     |
| PG1135  |        | 2.55 E-1                                                        | 10.3      | 5          | 1.0381                 | 3.9324               | Y          | ●                            | ● | Y       | 1.5 E-1   | 2.94 E+6   | 2.44 E+6               | 0.2681               | 22.3592   | Y ● |
| PGN1233 | PG1017 | <i>bacterial sugar transferase</i>                              |           |            |                        |                      |            |                              |   |         |           |            |                        |                      |           |     |
| PG1137  |        | 6.69 E-1                                                        | 1.7       | 1.5        | 0.1901                 | 1.6832               | Y          | ●                            | ● | G       | 0         | 1.85 E+3   | 4.92 E+5               | -8.0541              | 18.9133   | Y ● |
| PGN1235 | PG1019 | <i>porS porS protein</i>                                        |           |            |                        |                      |            |                              |   |         |           |            |                        |                      |           |     |
| PG1138  |        | 6 E-1                                                           | 3.4       | 4.5        | -0.3948                | 2.9860               | Y          | ●                            | ● | Y       | 4.74 E-2  | 5.85 E+5   | 1.15 E+6               | -0.9710              | 20.7232   | Y ● |
| PGN1236 | PG1020 | <i>porR pigmentation and extracellular proteinase regulator</i> |           |            |                        |                      |            |                              |   |         |           |            |                        |                      |           |     |
| PG1139  |        | 8.55 E-2                                                        | 11.1      | 3.5        | 1.6682                 | 3.8702               | Y          | ●                            | ● | Y       | 6.61 E-2  | 2 E+6      | 2.95 E+6               | -0.5584              | 22.2380   | Y ● |
| PGN1238 | PG1021 | <i>hypothetical protein PG_1139</i>                             |           |            |                        |                      |            |                              |   |         |           |            |                        |                      |           |     |
| PG1140  |        | 6.69 E-1                                                        | 3.4       | 3          | 0.1901                 | 2.6832               | Y          | ●                            | ● | R       | 1.93 E-4  | 8.72 E+5   | 4.96 E+5               | 0.8130               | 20.3832   | R ● |
| PGN1239 | PG1022 | <i>glycosyl transferase group 2 family protein</i>              |           |            |                        |                      |            |                              |   |         |           |            |                        |                      |           |     |



| TIGR    |        | PP PPC / Pg Spectral Count                                              |           |            |                        |                      |            | PP PPC/ Pg Protein Intensity |   |         |           |            |                        | 33277                |           |     |
|---------|--------|-------------------------------------------------------------------------|-----------|------------|------------------------|----------------------|------------|------------------------------|---|---------|-----------|------------|------------------------|----------------------|-----------|-----|
| PGN     | LANL   | q-value                                                                 | PP (Norm) | PPC (Norm) | log <sub>2</sub> Ratio | log <sub>2</sub> Sum | Regulation |                              |   | q-value | PP (Norm) | PPC (Norm) | log <sub>2</sub> Ratio | log <sub>2</sub> Sum | Consensus |     |
| PG1141  |        | 4.45 E-2                                                                | 18.0      | 6.5        | 1.4670                 | 4.6129               | Y          | ●                            | ● | Y       | 6.43 E-3  | 3.48 E+6   | 1.91 E+6               | 0.8692               | 22.3618   | Y ● |
| PGN1240 | PG1023 | <i>glycosyl transferase group 1 family protein</i>                      |           |            |                        |                      |            |                              |   |         |           |            |                        |                      |           |     |
| PG1143  |        | 6.77 E-1                                                                | 4.3       | 4          | 0.0970                 | 3.0493               | Y          | ●                            | ● | Y       | 3.21 E-3  | 1.56 E+6   | 1.23 E+6               | 0.3455               | 21.4144   | Y ● |
| PGN1243 | PG1026 | <i>sugar dehydrogenase UDP-glucose/GDP-mannose dehydrogenase family</i> |           |            |                        |                      |            |                              |   |         |           |            |                        |                      |           |     |
| PG1144  |        | 2.52 E-1                                                                | 5.1       | 10.5       | -1.0323                | 3.9666               | Y          | ●                            | ● | Y       | 7 E-2     | 1.33 E+6   | 2.09 E+6               | -0.6498              | 21.7047   | Y ● |
| PGN1244 | PG1027 |                                                                         |           |            |                        |                      |            |                              |   |         |           |            |                        |                      |           |     |
| PG1145  |        | 6.94 E-1                                                                | 10.3      | 10.5       | -0.0323                | 4.3763               | Y          | ●                            | ● | Y       | 6.5 E-3   | 4.19 E+6   | 6.92 E+6               | -0.7220              | 23.4057   | Y ● |
| PGN1245 | PG1028 | <i>long-chain-fatty-acid--CoA ligase putative</i>                       |           |            |                        |                      |            |                              |   |         |           |            |                        |                      |           |     |
|         |        | 4.8 E-1                                                                 | 4.3       | 2.5        | 0.7751                 | 2.7609               | Y          | ●                            | ● | R       | 3.27 E-13 | 2.67 E+6   | 1.2 E+5                | 4.4767               | 21.4143   | R ● |
| PGN1246 |        |                                                                         |           |            |                        |                      |            |                              |   |         |           |            |                        |                      |           |     |
| PG1149  |        | 6.7 E-1                                                                 | 5.1       | 5.5        | -0.0994                | 3.4106               | Y          | ●                            | ● | R       | 0         | 2.45 E+6   | 6.26 E+5               | 1.9708               | 21.5540   | Y ● |
| PGN1251 | PG1029 | <i>glycosyl transferase group 1 family protein</i>                      |           |            |                        |                      |            |                              |   |         |           |            |                        |                      |           |     |
| PG1151  |        | 3.24 E-3                                                                | 35.1      | 12.5       | 1.4888                 | 5.5723               | R          | ●                            | ● | R       | 1.01 E-15 | 1.74 E+7   | 4.5 E+6                | 1.9540               | 24.3877   | R ● |
| PGN1252 | PG1031 | <i>alcohol dehydrogenase iron-containing</i>                            |           |            |                        |                      |            |                              |   |         |           |            |                        |                      |           |     |
|         |        | 1.41 E-1                                                                | 69.3      | 50         | 0.4711                 | 6.8985               | Y          | ●                            | ● | Y       | 5.05 E-3  | 2.75 E+7   | 4.87 E+7               | -0.8234              | 26.1844   | Y ● |
| PGN1254 |        |                                                                         |           |            |                        |                      |            |                              |   |         |           |            |                        |                      |           |     |
| PG1155  |        | 6 E-1                                                                   | 1.7       | 2.5        | -0.5468                | 2.0743               | Y          | ●                            | ● | Y       | 9.35 E-3  | 1.85 E+3   | 9.13 E+5               | -8.9458              | 19.8024   | Y ● |
| PGN1255 | PG1034 | <i>ADP-heptose--LPS heptosyltransferase putative</i>                    |           |            |                        |                      |            |                              |   |         |           |            |                        |                      |           |     |
| PG1156  |        | 6.69 E-1                                                                | 1.7       | 2          | -0.2249                | 1.8919               | Y          | ●                            | ● | Y       | 6.01 E-3  | 1.85 E+3   | 1.43 E+6               | -9.5918              | 20.4473   | Y ● |
| PGN1256 | PG1035 | <i>S4 domain protein</i>                                                |           |            |                        |                      |            |                              |   |         |           |            |                        |                      |           |     |
| PG1160  |        | 6.54 E-1                                                                | 2.6       | 2          | 0.3601                 | 2.1912               | Y          | ●                            | ● | Y       | 9.55 E-3  | 6.76 E+4   | 7.16 E+4               | -0.0840              | 17.0865   | Y ● |
| PGN1259 | PG1037 | <i>L-threonine-O-3-phosphate decarboxylase putative</i>                 |           |            |                        |                      |            |                              |   |         |           |            |                        |                      |           |     |
| PG1163  |        | 2.67 E-1                                                                | 2.6       | 6.5        | -1.3404                | 3.1806               | Y          | ●                            | ● | Y       | 1.14 E-2  | 1.45 E+6   | 9.85 E+5               | 0.5601               | 21.2161   | Y ● |
| PGN1262 | PG1040 | <i>cbiA cobyrinic acid ac-diamide synthase</i>                          |           |            |                        |                      |            |                              |   |         |           |            |                        |                      |           |     |
| PG1164  |        | 3.82 E-1                                                                | 19.7      | 14         | 0.4913                 | 5.0738               | Y          | ●                            | ● | Y       | 1.98 E-1  | 4.18 E+6   | 4.21 E+6               | -0.0103              | 23.0010   | Y ● |
| PGN1263 | PG1041 | <i>hypothetical protein PG_1164</i>                                     |           |            |                        |                      |            |                              |   |         |           |            |                        |                      |           |     |
| PG1165  |        | 6.69 E-1                                                                | 1.7       | 2          | -0.2249                | 1.8919               | Y          | ●                            | ● | G       | 0         | 1.85 E+3   | 1.56 E+5               | -6.3995              | 17.2702   | G ● |
| PGN1264 | PG1042 | <i>hypothetical protein PG_1165</i>                                     |           |            |                        |                      |            |                              |   |         |           |            |                        |                      |           |     |
| PG1171  |        | 4.89 E-1                                                                | 35.9      | 30.5       | 0.2367                 | 6.0539               | Y          | ●                            | ● | Y       | 6.11 E-3  | 1.66 E+7   | 9.96 E+6               | 0.7414               | 24.6649   | Y ● |
| PGN1268 | PG1044 | <i>oxidoreductase putative</i>                                          |           |            |                        |                      |            |                              |   |         |           |            |                        |                      |           |     |
| PG1172  |        | 2.25 E-4                                                                | 3.4       | 23.5       | -2.7795                | 4.7507               | G          | ●                            | ● | G       | 3.1 E-8   | 1.97 E+6   | 9.27 E+6               | -2.2320              | 23.4221   | G ● |
| PGN1269 | PG1045 | <i>iron-sulfur cluster binding protein putative</i>                     |           |            |                        |                      |            |                              |   |         |           |            |                        |                      |           |     |
| PG1173  |        | 2.96 E-1                                                                | 18.8      | 12         | 0.6496                 | 4.9460               | Y          | ●                            | ● | Y       | 1.13 E-1  | 9.14 E+6   | 7.77 E+6               | 0.2357               | 24.0113   | Y ● |
| PGN1270 | PG1046 | <i>YkgG family protein</i>                                              |           |            |                        |                      |            |                              |   |         |           |            |                        |                      |           |     |

| TIGR    |        | PP PPC / Pg Spectral Count                             |           |            |                        |                      |            | PP PPC/ Pg Protein Intensity |  |         |           |            |                        | 33277                |           |   |
|---------|--------|--------------------------------------------------------|-----------|------------|------------------------|----------------------|------------|------------------------------|--|---------|-----------|------------|------------------------|----------------------|-----------|---|
| PGN     | LANL   | q-value                                                | PP (Norm) | PPC (Norm) | log <sub>2</sub> Ratio | log <sub>2</sub> Sum | Regulation |                              |  | q-value | PP (Norm) | PPC (Norm) | log <sub>2</sub> Ratio | log <sub>2</sub> Sum | Consensus |   |
| PG1174  |        | 2.8 E-1                                                | 11.1      | 18         | -0.6944                | 4.8641               | Y          |                              |  | Y       | 3.45 E-3  | 2.08 E+6   | 3.3 E+6                | -0.6674              | 22.3596   | Y |
| PGN1271 | PG1047 | <i>thioesterase family protein</i>                     |           |            |                        |                      |            |                              |  |         |           |            |                        |                      |           |   |
| PG1058  |        | 1.46 E-2                                               | 6.8       | 21.5       | -1.6512                | 4.8250               | Y          |                              |  | Y       | 2.35 E-3  | 5.3 E+6    | 8.98 E+6               | -0.7603              | 23.7679   | Y |
| PGN1296 | PG0941 | <i>OmpA family protein</i>                             |           |            |                        |                      |            |                              |  |         |           |            |                        |                      |           |   |
| PG1057  |        | 6.55 E-1                                               | 5.1       | 6          | -0.2249                | 3.4769               | Y          |                              |  | Y       | 1.04 E-1  | 1.86 E+6   | 1.22 E+6               | 0.6019               | 21.5557   | Y |
| PGN1297 | PG0940 | <i>conserved hypothetical protein</i>                  |           |            |                        |                      |            |                              |  |         |           |            |                        |                      |           |   |
| PG1056  |        | 4.75 E-1                                               | 3.4       | 5.5        | -0.6843                | 3.1575               | Y          |                              |  | Y       | 3.63 E-2  | 1.02 E+6   | 1.78 E+6               | -0.8099              | 21.4180   | Y |
| PGN1298 | PG0939 | <i>conserved hypothetical protein</i>                  |           |            |                        |                      |            |                              |  |         |           |            |                        |                      |           |   |
| PG1050  |        | 1.49 E-2                                               | 12.0      | 2          | 2.5825                 | 3.8052               | Y          |                              |  | R       | 0         | 2.99 E+6   | 7.99 E+4               | 5.2262               | 21.5501   | R |
| PGN1303 | PG0934 | <i>hypothetical protein PG_1050</i>                    |           |            |                        |                      |            |                              |  |         |           |            |                        |                      |           |   |
| PG1049  |        | 1.6 E-1                                                | 18.0      | 29.5       | -0.7152                | 5.5689               | Y          |                              |  | G       | 8.5 E-8   | 7.44 E+6   | 2.06 E+7               | -1.4691              | 24.7408   | G |
| PGN1304 | PG0933 | <i>conserved hypothetical protein</i>                  |           |            |                        |                      |            |                              |  |         |           |            |                        |                      |           |   |
| PG1048  |        | 6.69 E-1                                               | 1.7       | 2          | -0.2249                | 1.8919               | Y          |                              |  | G       | 0         | 3.92 E+5   | 7.32 E+5               | -0.9010              | 20.0993   | G |
| PGN1305 | PG0932 | <i>N-acetylmuramoyl-L-alanine amidase family 3</i>     |           |            |                        |                      |            |                              |  |         |           |            |                        |                      |           |   |
| PG1044  |        | 9.48 E-2                                               | 1.7       | 7.5        | -2.1318                | 3.2034               | Y          |                              |  | G       | 6.6 E-6   | 1.85 E+3   | 2.34 E+6               | -10.3030             | 21.1579   | G |
| PGN1308 | PG0931 | <i>iron dependent repressor putative</i>               |           |            |                        |                      |            |                              |  |         |           |            |                        |                      |           |   |
| PG1042  |        | 6.69 E-1                                               | 1.7       | 1.5        | 0.1901                 | 1.6832               | Y          |                              |  | G       | 0         | 1.85 E+3   | 1.32 E+5               | -6.1601              | 17.0338   | Y |
| PGN1310 | PG0929 | <i>glycogen synthase putative</i>                      |           |            |                        |                      |            |                              |  |         |           |            |                        |                      |           |   |
| PG1041  |        | 6.69 E-1                                               | 1.7       | 1.5        | 0.1901                 | 1.6832               | Y          |                              |  | G       | 0         | 1.85 E+3   | 2.1 E+6                | -10.1462             | 21.0012   | Y |
| PGN1311 | PG0928 | <i>K+-dependent Na+/Ca+ exchanger related-protein</i>  |           |            |                        |                      |            |                              |  |         |           |            |                        |                      |           |   |
| PG1039  |        | 5.43 E-1                                               | 3.4       | 5          | -0.5468                | 3.0743               | Y          |                              |  | Y       | 1.6 E-1   | 1.11 E+6   | 1.19 E+6               | -0.1029              | 21.1349   | Y |
| PGN1313 | PG0926 | <i>integral membrane protein</i>                       |           |            |                        |                      |            |                              |  |         |           |            |                        |                      |           |   |
| PG1038  |        | 1.53 E-1                                               | 2.6       | 8          | -1.6399                | 3.4015               | Y          |                              |  | Y       | 1.76 E-2  | 6.84 E+5   | 1.55 E+6               | -1.1791              | 21.0913   | Y |
| PGN1314 | PG0925 | <i>ATP-dependent DNA helicase UvrD/PcrA/Rep Family</i> |           |            |                        |                      |            |                              |  |         |           |            |                        |                      |           |   |
| PG1037  |        | 0                                                      | 298.6     | 107.5      | 1.4740                 | 8.6658               | R          |                              |  | R       | 0         | 2.47 E+8   | 9.1 E+7                | 1.4385               | 28.3314   | R |
| PGN1315 | PG0924 | <i>hypothetical protein PG_1037</i>                    |           |            |                        |                      |            |                              |  |         |           |            |                        |                      |           |   |
| PG1036  |        | 6.97 E-1                                               | 5.1       | 5          | 0.0381                 | 3.3411               | Y          |                              |  | Y       | 6.54 E-3  | 9.28 E+5   | 1.65 E+6               | -0.8342              | 21.2999   | Y |
| PGN1316 | PG0923 | <i>uvrA-1 excinuclease ABC A subunit</i>               |           |            |                        |                      |            |                              |  |         |           |            |                        |                      |           |   |
| PG1035  |        | 1.42 E-1                                               | 6.8       | 15         | -1.1318                | 4.4492               | Y          |                              |  | G       | 8.08 E-6  | 2.35 E+6   | 7.45 E+6               | -1.6636              | 23.2237   | G |
| PGN1317 | PG0922 | <i>hypothetical protein PG_1035</i>                    |           |            |                        |                      |            |                              |  |         |           |            |                        |                      |           |   |
| PG1034  |        | 4.65 E-1                                               | 2.6       | 4.5        | -0.8099                | 2.8211               | Y          |                              |  | R       | 8.69 E-8  | 1.72 E+6   | 5.92 E+5               | 1.5355               | 21.1387   | Y |
| PGN1318 | PG0921 | <i>ABC transporter ATP-binding protein</i>             |           |            |                        |                      |            |                              |  |         |           |            |                        |                      |           |   |
| PG1030  |        | 4.28 E-1                                               | 25.7      | 32         | -0.3180                | 5.8497               | Y          |                              |  | Y       | 2.87 E-2  | 1.22 E+7   | 2.05 E+7               | -0.7472              | 24.9626   | Y |
| PGN1321 | PG0917 | <i>hypothetical protein PG_1030</i>                    |           |            |                        |                      |            |                              |  |         |           |            |                        |                      |           |   |

| TIGR    |        | PP PPC / Pg Spectral Count                             |           |            |                        |                      |                                                                                                                                                                                 | PP PPC/ Pg Protein Intensity |           |            |                        |                      |                                                                                         | 33277 |
|---------|--------|--------------------------------------------------------|-----------|------------|------------------------|----------------------|---------------------------------------------------------------------------------------------------------------------------------------------------------------------------------|------------------------------|-----------|------------|------------------------|----------------------|-----------------------------------------------------------------------------------------|-------|
| PGN     | LANL   | q-value                                                | PP (Norm) | PPC (Norm) | log <sub>2</sub> Ratio | log <sub>2</sub> Sum | Regulation                                                                                                                                                                      | q-value                      | PP (Norm) | PPC (Norm) | log <sub>2</sub> Ratio | log <sub>2</sub> Sum | Consensus                                                                               |       |
| PG1029  |        | 5.89 E-3                                               | 11.1      | 1          | 3.4755                 | 3.5997               | Y   R     | 2.77 E-14                    | 5.24 E+5  | 1 E+3      | 9.0343                 | 19.0028              | R    |       |
| PGN1322 |        | <i>hypothetical protein PG_1029</i>                    |           |            |                        |                      |                                                                                                                                                                                 |                              |           |            |                        |                      |                                                                                         |       |
| PG1028  |        | 4.61 E-3                                               | 199.4     | 140        | 0.5100                 | 8.4067               | R   Y     | 1.5 E-1                      | 1.65 E+8  | 1.72 E+8   | -0.0574                | 28.3278              | Y    |       |
| PGN1323 | PG0916 | <i>TPR domain protein</i>                              |           |            |                        |                      |                                                                                                                                                                                 |                              |           |            |                        |                      |                                                                                         |       |
|         |        | 1.59 E-1                                               | 8.6       | 17         | -0.9904                | 4.6756               | Y   Y     | 2.94 E-2                     | 2.82 E+6  | 5.08 E+6   | -0.8505                | 22.9126              | Y    |       |
| PGN1326 |        |                                                        |           |            |                        |                      |                                                                                                                                                                                 |                              |           |            |                        |                      |                                                                                         |       |
|         |        | 2.8 E-2                                                | 31.7      | 14.5       | 1.1266                 | 5.5285               | Y   R     | 5.01 E-9                     | 1.27 E+7  | 3.6 E+6    | 1.8181                 | 23.9586              | R    |       |
| PGN1327 |        |                                                        |           |            |                        |                      |                                                                                                                                                                                 |                              |           |            |                        |                      |                                                                                         |       |
|         |        | 6.41 E-1                                               | 73.6      | 70         | 0.0721                 | 7.1658               | Y   Y     | 3.8 E-2                      | 3.83 E+7  | 3.08 E+7   | 0.3144                 | 26.0414              | Y    |       |
| PGN1328 |        |                                                        |           |            |                        |                      |                                                                                                                                                                                 |                              |           |            |                        |                      |                                                                                         |       |
| PG0685  |        | 6.97 E-1                                               | 2.6       | 2.5        | 0.0381                 | 2.3411               | Y   G     | 0                            | 8.52 E+5  | 1 E+6      | -0.2386                | 20.8242              | Y    |       |
| PGN1329 | PG0618 | <i>ABC transporter ATP-binding protein</i>             |           |            |                        |                      |                                                                                                                                                                                 |                              |           |            |                        |                      |                                                                                         |       |
| PG0628  |        | 4.23 E-1                                               | 2.6       | 1          | 1.3601                 | 1.8347               | Y   R     | 0                            | 1.96 E+6  | 1 E+3      | 10.9341                | 20.9006              | R    |       |
| PGN1330 | PG0566 | <i>ABC transporter ATP-binding protein</i>             |           |            |                        |                      |                                                                                                                                                                                 |                              |           |            |                        |                      |                                                                                         |       |
| PG1022  |        | 6.69 E-1                                               | 1.7       | 2          | -0.2249                | 1.8919               | Y   Y     | 6.86 E-2                     | 1.85 E+3  | 1.35 E+6   | -9.5127                | 20.3684              | Y    |       |
| PGN1334 | PG0911 | <i>hypothetical protein PG_1022</i>                    |           |            |                        |                      |                                                                                                                                                                                 |                              |           |            |                        |                      |                                                                                         |       |
| PG1020  |        | 5.43 E-1                                               | 6.8       | 5          | 0.4532                 | 3.5662               | Y   Y     | 2.89 E-3                     | 1.52 E+6  | 9.58 E+5   | 0.6683                 | 21.2423              | Y    |       |
| PGN1335 | PG0910 | <i>hypothetical protein PG_1020</i>                    |           |            |                        |                      |                                                                                                                                                                                 |                              |           |            |                        |                      |                                                                                         |       |
| PG1017  |        | 1.11 E-8                                               | 559.6     | 373.5      | 0.5833                 | 9.8659               | R   R     | 0                            | 4.87 E+8  | 1.35 E+8   | 1.8526                 | 29.2117              | R    |       |
| PGN1338 | PG0907 | <i>ppdK pyruvate phosphate dikinase</i>                |           |            |                        |                      |                                                                                                                                                                                 |                              |           |            |                        |                      |                                                                                         |       |
| PG1014  |        | 6 E-1                                                  | 39.4      | 36         | 0.1287                 | 6.2357               | Y   Y     | 1.03 E-1                     | 1.39 E+7  | 1.21 E+7   | 0.1995                 | 24.6366              | Y    |       |
| PGN1340 | PG0906 | <i>TPR domain protein</i>                              |           |            |                        |                      |                                                                                                                                                                                 |                              |           |            |                        |                      |                                                                                         |       |
| PG1013  |        | 6.54 E-7                                               | 199.4     | 321.5      | -0.6894                | 9.0248               | G   Y   | 1.25 E-2                     | 2.34 E+8  | 3 E+8      | -0.3581                | 28.9931              | G   |       |
| PGN1341 | PG0905 | <i>acetyl-CoA hydrolase/transferase family protein</i> |           |            |                        |                      |                                                                                                                                                                                 |                              |           |            |                        |                      |                                                                                         |       |
| PG1012  |        | 1.05 E-1                                               | 8.6       | 18.5       | -1.1124                | 4.7579               | Y   Y | 7.65 E-2                     | 3.92 E+6  | 6.02 E+6   | -0.6170                | 23.2450              | Y  |       |
| PGN1342 | PG0904 | <i>tRNA-i(6)A37 modification enzyme MiaB</i>           |           |            |                        |                      |                                                                                                                                                                                 |                              |           |            |                        |                      |                                                                                         |       |
| PG1010  |        | 6.69 E-1                                               | 12.0      | 13         | -0.1180                | 4.6427               | Y   Y | 2.7 E-3                      | 6.08 E+6  | 1.43 E+7   | -1.2319                | 24.2791              | Y  |       |
| PGN1343 | PG0903 | <i>ABC transporter ATP-binding protein</i>             |           |            |                        |                      |                                                                                                                                                                                 |                              |           |            |                        |                      |                                                                                         |       |
| PG1006  |        | 0                                                      | 12.0      | 200        | -4.0614                | 7.7278               | G   G | 0                            | 1.9 E+6   | 6.65 E+7   | -5.1296                | 26.0275              | G  |       |
| PGN1347 | PG0899 | <i>hypothetical protein PG_1006</i>                    |           |            |                        |                      |                                                                                                                                                                                 |                              |           |            |                        |                      |                                                                                         |       |
| PG1004  |        | 4.33 E-1                                               | 325.1     | 304.5      | 0.0947                 | 9.2984               | Y   Y | 1.61 E-1                     | 2.88 E+8  | 2.95 E+8   | -0.0368                | 29.1185              | Y  |       |
| PGN1349 | PG0897 | <i>prolyl oligopeptidase family protein</i>            |           |            |                        |                      |                                                                                                                                                                                 |                              |           |            |                        |                      |                                                                                         |       |
| PG1003  |        | 6.05 E-2                                               | 1.7       | 8.5        | -2.3124                | 3.3521               | Y   G | 3.34 E-5                     | 1.85 E+3  | 1.59 E+6   | -9.7430                | 20.5984              | G  |       |
| PGN1350 | PG0896 | <i>conserved hypothetical protein</i>                  |           |            |                        |                      |                                                                                                                                                                                 |                              |           |            |                        |                      |                                                                                         |       |

| TIGR    |        | PP PPC / Pg Spectral Count                                  |           |            |                        |                      |            | PP PPC/ Pg Protein Intensity |  |         |           |            |                        | 33277                |           |   |
|---------|--------|-------------------------------------------------------------|-----------|------------|------------------------|----------------------|------------|------------------------------|--|---------|-----------|------------|------------------------|----------------------|-----------|---|
| PGN     | LANL   | q-value                                                     | PP (Norm) | PPC (Norm) | log <sub>2</sub> Ratio | log <sub>2</sub> Sum | Regulation |                              |  | q-value | PP (Norm) | PPC (Norm) | log <sub>2</sub> Ratio | log <sub>2</sub> Sum | Consensus |   |
| PG1001  |        | 4.75 E-1                                                    | 6.8       | 4.5        | 0.6052                 | 3.5040               | Y          |                              |  | Y       | 7.29 E-2  | 1.4 E+6    | 8.21 E+6               | -2.5553              | 23.1961   | Y |
| PGN1352 | PG0894 | <i>conserved hypothetical protein</i>                       |           |            |                        |                      |            |                              |  |         |           |            |                        |                      |           |   |
| PG1215  |        | 3.5 E-1                                                     | 7.7       | 12.5       | -0.6988                | 4.3363               | Y          |                              |  | Y       | 2.18 E-3  | 2.33 E+6   | 4.08 E+6               | -0.8107              | 22.6113   | Y |
| PGN1354 | PG1076 | <i>lipoprotein protein putative</i>                         |           |            |                        |                      |            |                              |  |         |           |            |                        |                      |           |   |
| PG1217  |        | 2.52 E-6                                                    | 27.4      | 2          | 3.7751                 | 4.8768               | R          |                              |  | R       | 1.31 E-9  | 2.26 E+7   | 4.88 E+5               | 5.5336               | 24.4614   | R |
| PGN1356 | PG1077 | <i>hypothetical protein PG_1217</i>                         |           |            |                        |                      |            |                              |  |         |           |            |                        |                      |           |   |
| PG1219  |        | 3.93 E-1                                                    | 42.8      | 34.5       | 0.3104                 | 6.2721               | Y          |                              |  | Y       | 9.75 E-2  | 4.34 E+7   | 5.27 E+7               | -0.2822              | 26.5181   | Y |
| PGN1358 | PG1079 | <i>hypothetical protein PG_1219</i>                         |           |            |                        |                      |            |                              |  |         |           |            |                        |                      |           |   |
| PG1220  |        | 4.94 E-3                                                    | 2.6       | 15.5       | -2.5941                | 4.1753               | G          |                              |  | G       | 3.05 E-5  | 1.57 E+6   | 5.42 E+6               | -1.7833              | 22.7376   | G |
| PGN1359 | PG1081 | <i>erythronate-4-phosphate dehydrogenase putative</i>       |           |            |                        |                      |            |                              |  |         |           |            |                        |                      |           |   |
| PG1224  |        | 6.69 E-1                                                    | 1.7       | 2          | -0.2249                | 1.8919               | Y          |                              |  | G       | 8.9 E-10  | 1.85 E+3   | 1.72 E+5               | -6.5412              | 17.4103   | G |
| PGN1362 | PG1083 |                                                             |           |            |                        |                      |            |                              |  |         |           |            |                        |                      |           |   |
| PG1225  |        | 5.89 E-1                                                    | 1.7       | 1          | 0.7751                 | 1.4390               | Y          |                              |  | R       | 0         | 3.1 E+5    | 1 E+3                  | 8.2764               | 18.2469   | R |
| PGN1363 | PG1084 | <i>ABC transporter ATP-binding protein</i>                  |           |            |                        |                      |            |                              |  |         |           |            |                        |                      |           |   |
| PG1226  |        | 6.69 E-1                                                    | 3.4       | 3          | 0.1901                 | 2.6832               | Y          |                              |  | Y       | 3.48 E-2  | 7.49 E+5   | 1.11 E+6               | -0.5637              | 20.8237   | Y |
| PGN1364 | PG1085 | <i>peptidyl-prolyl cis-trans isomerase cyclophilin-type</i> |           |            |                        |                      |            |                              |  |         |           |            |                        |                      |           |   |
| PG1230  |        | 7 E-1                                                       | 36.8      | 37         | -0.0081                | 6.2054               | Y          |                              |  | Y       | 1.55 E-1  | 1.72 E+7   | 1.85 E+7               | -0.1043              | 25.0871   | Y |
| PGN1366 | PG1089 | <i>hypothetical protein PG_1230</i>                         |           |            |                        |                      |            |                              |  |         |           |            |                        |                      |           |   |
| PG1232  |        | 1.3 E-9                                                     | 2892.1    | 3405       | -0.2355                | 12.6205              | G          |                              |  | Y       | 1.42 E-2  | 4.72 E+9   | 5.38 E+9               | -0.1904              | 33.2331   | G |
| PGN1367 | PG1090 | <i>gdh glutamate dehydrogenase NAD-specific</i>             |           |            |                        |                      |            |                              |  |         |           |            |                        |                      |           |   |
| PG1235  |        | 3.42 E-7                                                    | 166.0     | 80.5       | 1.0441                 | 7.9454               | R          |                              |  | R       | 0         | 1.34 E+8   | 5.42 E+7               | 1.3060               | 27.4866   | R |
| PGN1370 | PG1091 | <i>epimerase/reductase putative</i>                         |           |            |                        |                      |            |                              |  |         |           |            |                        |                      |           |   |
| PG1236  |        | 5.25 E-3                                                    | 51.3      | 24         | 1.0970                 | 6.2353               | R          |                              |  | R       | 8.23 E-9  | 1.35 E+7   | 5.87 E+6               | 1.2074               | 24.2103   | R |
| PGN1372 | PG1092 | <i>hypothetical protein PG_1236</i>                         |           |            |                        |                      |            |                              |  |         |           |            |                        |                      |           |   |
| PG1237  |        | 6.85 E-1                                                    | 4.3       | 4.5        | -0.0729                | 3.1339               | Y          |                              |  | Y       | 1.25 E-1  | 1.44 E+6   | 1.86 E+6               | -0.3709              | 21.6520   | Y |
| PGN1373 | PG1093 | <i>transcriptional regulator LuxR family</i>                |           |            |                        |                      |            |                              |  |         |           |            |                        |                      |           |   |
| PG1239  |        | 7.32 E-8                                                    | 106.1     | 38         | 1.4814                 | 7.1709               | R          |                              |  | R       | 4.07 E-11 | 1 E+8      | 3.3 E+7                | 1.6034               | 26.9912   | R |
| PGN1375 | PG1095 | <i>fabG 3-oxoacyl-(acyl-carrier-protein) reductase</i>      |           |            |                        |                      |            |                              |  |         |           |            |                        |                      |           |   |
| PG1240  |        | 5.17 E-1                                                    | 7.7       | 5.5        | 0.4856                 | 3.7226               | Y          |                              |  | Y       | 6.1 E-3   | 2.39 E+6   | 1.35 E+6               | 0.8292               | 21.8350   | Y |
| PGN1376 | PG1096 | <i>transcriptional regulator tetR family</i>                |           |            |                        |                      |            |                              |  |         |           |            |                        |                      |           |   |
| PG1241  |        | 4.07 E-2                                                    | 12.0      | 3          | 1.9975                 | 3.9049               | Y          |                              |  | R       | 0         | 7.46 E+6   | 7.81 E+5               | 3.2555               | 22.9748   | R |
| PGN1377 | PG1097 | <i>lepA GTP-binding protein Lepa</i>                        |           |            |                        |                      |            |                              |  |         |           |            |                        |                      |           |   |
| PG1242  |        | 9.44 E-2                                                    | 6.0       | 1          | 2.5825                 | 2.8052               | Y          |                              |  | R       | 0         | 1.44 E+6   | 1 E+3                  | 10.4938              | 20.4606   | R |
| PGN1378 | PG1098 | <i>dnaB replicative DNA helicase</i>                        |           |            |                        |                      |            |                              |  |         |           |            |                        |                      |           |   |

| TIGR    |        | PP PPC / Pg Spectral Count                                              |           |            |                        |                      |            | PP PPC/ Pg Protein Intensity |           |            |                        |                      |           | 33277 |
|---------|--------|-------------------------------------------------------------------------|-----------|------------|------------------------|----------------------|------------|------------------------------|-----------|------------|------------------------|----------------------|-----------|-------|
| PGN     | LANL   | q-value                                                                 | PP (Norm) | PPC (Norm) | log <sub>2</sub> Ratio | log <sub>2</sub> Sum | Regulation | q-value                      | PP (Norm) | PPC (Norm) | log <sub>2</sub> Ratio | log <sub>2</sub> Sum | Consensus |       |
| PG1246  |        | 1.13 E-4                                                                | 178.8     | 107        | 0.7410                 | 8.1590               | R          | 9.96 E-11                    | 1.14 E+8  | 6.31 E+7   | 0.8558                 | 27.4016              | R         |       |
| PGN1381 | PG1101 | <i>alaS alanyl-tRNA synthetase</i>                                      |           |            |                        |                      |            |                              |           |            |                        |                      |           |       |
| PG1247  |        | 5.17 E-1                                                                | 1.7       | 3          | -0.8099                | 2.2361               | Y          | 2.67 E-7                     | 1.85 E+3  | 2.98 E+5   | -7.3331                | 18.1957              | G         |       |
| PGN1382 | PG1102 | <i>aroB 3-dehydroquinase synthase</i>                                   |           |            |                        |                      |            |                              |           |            |                        |                      |           |       |
| PG1248  |        | 6.54 E-1                                                                | 8.6       | 7.5        | 0.1901                 | 4.0051               | Y          | 1.53 E-2                     | 2.48 E+6  | 1.47 E+6   | 0.7539                 | 21.9141              | Y         |       |
| PGN1383 | PG1103 | <i>conserved hypothetical protein</i>                                   |           |            |                        |                      |            |                              |           |            |                        |                      |           |       |
| PG1249  |        | 4.21 E-1                                                                | 3.4       | 1.5        | 1.1901                 | 2.2994               | Y          | 0                            | 1.93 E+6  | 1.51 E+5   | 3.6762                 | 20.9920              | R         |       |
| PGN1384 | PG1104 | <i>1-acyl-sn-glycerol-3-phosphate acetyltransferase putative</i>        |           |            |                        |                      |            |                              |           |            |                        |                      |           |       |
| PG1252  |        | 6.69 E-1                                                                | 1.7       | 1.5        | 0.1901                 | 1.6832               | Y          | 0                            | 1.85 E+3  | 7.65 E+4   | -5.3694                | 16.2576              | Y         |       |
| PGN1387 | PG1106 | <i>membrane protein putative</i>                                        |           |            |                        |                      |            |                              |           |            |                        |                      |           |       |
| PG1253  |        | 5.43 E-1                                                                | 3.4       | 5          | -0.5468                | 3.0743               | Y          | 6.08 E-3                     | 2.31 E+5  | 1.05 E+6   | -2.1830                | 20.2874              | Y         |       |
| PGN1388 | PG1107 | <i>ligA DNA ligase NAD-dependent</i>                                    |           |            |                        |                      |            |                              |           |            |                        |                      |           |       |
| PG1255  |        | 6.69 E-1                                                                | 1.7       | 1.5        | 0.1901                 | 1.6832               | Y          | 0                            | 1.85 E+3  | 1.12 E+5   | -5.9249                | 16.8021              | Y         |       |
| PGN1390 | PG1109 | <i>recR recombination protein RecR</i>                                  |           |            |                        |                      |            |                              |           |            |                        |                      |           |       |
| PG1256  |        | 7.01 E-1                                                                | 17.1      | 17         | 0.0096                 | 5.0923               | Y          | 2.2 E-4                      | 6.47 E+6  | 3.09 E+6   | 1.0679                 | 23.1876              | R         |       |
| PGN1391 | PG1110 | <i>ribonuclease Rne/Rng family</i>                                      |           |            |                        |                      |            |                              |           |            |                        |                      |           |       |
| PG1258  |        | 3.25 E-1                                                                | 34.2      | 25.5       | 0.4246                 | 5.9003               | Y          | 1.73 E-1                     | 5.37 E+7  | 5.07 E+7   | 0.0847                 | 26.6371              | Y         |       |
| PGN1393 | PG1111 | <i>hup-2 DNA-binding protein HU</i>                                     |           |            |                        |                      |            |                              |           |            |                        |                      |           |       |
| PG1260  |        | 1.67 E-1                                                                | 292.6     | 254        | 0.2043                 | 9.0944               | Y          | 9.02 E-3                     | 1.97 E+8  | 2.48 E+8   | -0.3301                | 28.7278              | Y         |       |
| PGN1396 | PG1113 | <i>anaerobic ribonucleoside-triphosphate reductase putative</i>         |           |            |                        |                      |            |                              |           |            |                        |                      |           |       |
| PG1269  |        | 6.69 E-1                                                                | 309.7     | 315        | -0.0243                | 9.2871               | Y          | 1.34 E-2                     | 4 E+8     | 5 E+8      | -0.3237                | 29.7450              | Y         |       |
| PGN1401 | PG1120 | <i>pruA delta-1-pyrroline-5-carboxylate dehydrogenase</i>               |           |            |                        |                      |            |                              |           |            |                        |                      |           |       |
| PG1270  |        | 4.62 E-3                                                                | 29.1      | 9.5        | 1.6146                 | 5.2702               | R          | 0                            | 2.36 E+7  | 3.07 E+6   | 2.9445                 | 24.6687              | R         |       |
| PGN1402 | PG1121 | <i>conserved hypothetical protein</i>                                   |           |            |                        |                      |            |                              |           |            |                        |                      |           |       |
| PG1271  |        | 1.55 E-3                                                                | 325.1     | 422.5      | -0.3779                | 9.5462               | G          | 8.93 E-3                     | 2.8 E+8   | 3.64 E+8   | -0.3794                | 29.2632              | G         |       |
| PGN1403 | PG1122 | <i>acetylornithine aminotransferase putative</i>                        |           |            |                        |                      |            |                              |           |            |                        |                      |           |       |
| PG0562  |        | 4.23 E-1                                                                | 2.6       | 1          | 1.3601                 | 1.8347               | Y          | 0                            | 7.42 E+5  | 1 E+3      | 9.5344                 | 19.5021              | R         |       |
| PGN1408 | PG0508 | <i>potassium uptake protein TrkA putative</i>                           |           |            |                        |                      |            |                              |           |            |                        |                      |           |       |
| PG0561  |        | 5.8 E-1                                                                 | 182.3     | 173.5      | 0.0710                 | 8.4747               | Y          | 2.95 E-2                     | 1.65 E+8  | 2.02 E+8   | -0.2949                | 28.4534              | Y         |       |
| PGN1409 | PG0507 | <i>peptidase M20/M25/M40 family</i>                                     |           |            |                        |                      |            |                              |           |            |                        |                      |           |       |
| PG0559  |        | 1.53 E-1                                                                | 2.6       | 8          | -1.6399                | 3.4015               | Y          | 4.39 E-6                     | 1 E+6     | 6.45 E+6   | -2.6859                | 22.8292              | G         |       |
| PGN1411 | PG0506 | <i>chlorohydrolase family protein</i>                                   |           |            |                        |                      |            |                              |           |            |                        |                      |           |       |
| PG0558  |        | 1.21 E-5                                                                | 67.6      | 135        | -0.9979                | 7.6625               | G          | 1.81 E-3                     | 3.32 E+7  | 6.1 E+7    | -0.8758                | 26.4901              | G         |       |
| PGN1412 | PG0505 | <i>purine nucleoside phosphorylase I inosine and guanosine-specific</i> |           |            |                        |                      |            |                              |           |            |                        |                      |           |       |

| TIGR    |        | PP PPC / Pg Spectral Count                                           |           |            |                        |                      |            | PP PPC/ Pg Protein Intensity |           |            |                        |                      |           | 33277 |
|---------|--------|----------------------------------------------------------------------|-----------|------------|------------------------|----------------------|------------|------------------------------|-----------|------------|------------------------|----------------------|-----------|-------|
| PGN     | LANL   | q-value                                                              | PP (Norm) | PPC (Norm) | log <sub>2</sub> Ratio | log <sub>2</sub> Sum | Regulation | q-value                      | PP (Norm) | PPC (Norm) | log <sub>2</sub> Ratio | log <sub>2</sub> Sum | Consensus |       |
| PG0555  |        | 5.47 E-3                                                             | 4.3       | 19         | -2.1509                | 4.5409               | G          | 2.65 E-2                     | 7.41 E+5  | 1.15 E+6   | -0.6364                | 20.8531              | G         |       |
| PGN1415 | PG0502 | <i>DNA-binding protein histone-like family</i>                       |           |            |                        |                      |            |                              |           |            |                        |                      |           |       |
| PG0553  |        | 5.63 E-4                                                             | 312.3     | 416        | -0.4136                | 9.5084               | G          | 1.59 E-3                     | 1.89 E+8  | 2.67 E+8   | -0.4976                | 28.7643              | G         |       |
| PGN1416 | PG0501 | <i>extracellular protease putative</i>                               |           |            |                        |                      |            |                              |           |            |                        |                      |           |       |
| PG0548  |        | 1.1 E-1                                                              | 328.6     | 281.5      | 0.2231                 | 9.2528               | Y          | 5.48 E-4                     | 2.27 E+8  | 1.62 E+8   | 0.4895                 | 28.5337              | R         |       |
| PGN1418 | PG0498 | <i>pyruvate ferredoxin/ flavodoxin oxidoreductase family protein</i> |           |            |                        |                      |            |                              |           |            |                        |                      |           |       |
| PG0547  |        | 1.34 E-7                                                             | 53.1      | 10         | 2.4074                 | 5.9784               | R          | 3.5 E-6                      | 3.56 E+7  | 5.8 E+6    | 2.6176                 | 25.3031              | R         |       |
| PGN1419 | PG0497 | <i>conserved hypothetical protein</i>                                |           |            |                        |                      |            |                              |           |            |                        |                      |           |       |
|         |        | 3.82 E-1                                                             | 1.7       | 4          | -1.2249                | 2.5138               | Y          | 5.45 E-3                     | 1.85 E+3  | 8.99 E+5   | -8.9245                | 19.7812              | Y         |       |
| PGN1426 |        |                                                                      |           |            |                        |                      |            |                              |           |            |                        |                      |           |       |
| PG0541  |        | 6.94 E-1                                                             | 7.7       | 7.5        | 0.0381                 | 3.9261               | Y          | 1.93 E-1                     | 3.56 E+6  | 3.42 E+6   | 0.0568                 | 22.7352              | Y         |       |
| PGN1429 | PG0494 | <i>hypothetical protein PG_0541</i>                                  |           |            |                        |                      |            |                              |           |            |                        |                      |           |       |
|         |        | 3.05 E-1                                                             | 18.0      | 11.5       | 0.6439                 | 4.8811               | Y          | 1.49 E-1                     | 9.48 E+6  | 8.52 E+6   | 0.1540                 | 24.1020              | Y         |       |
| PGN1430 |        |                                                                      |           |            |                        |                      |            |                              |           |            |                        |                      |           |       |
| PG0539  |        | 1.98 E-1                                                             | 15.4      | 8          | 0.9450                 | 4.5485               | Y          | 8.61 E-5                     | 7.47 E+6  | 3.69 E+6   | 1.0155                 | 23.4123              | R         |       |
| PGN1431 | PG0492 | <i>efflux transporter MFP component RND family</i>                   |           |            |                        |                      |            |                              |           |            |                        |                      |           |       |
| PG0538  |        | 1.86 E-2                                                             | 10.3      | 26.5       | -1.3679                | 5.2004               | Y          | 3.38 E-4                     | 3.93 E+6  | 8.69 E+6   | -1.1472                | 23.5890              | G         |       |
| PGN1432 | PG0490 | <i>outer membrane efflux protein</i>                                 |           |            |                        |                      |            |                              |           |            |                        |                      |           |       |
| PG0537  |        | 2.5 E-13                                                             | 616.1     | 917        | -0.5738                | 10.5822              | G          | 1.06 E-2                     | 5.45 E+8  | 6.53 E+8   | -0.2614                | 30.1571              | G         |       |
| PGN1434 | PG0489 | <i>pepD-2 aminoacyl-histidine dipeptidase</i>                        |           |            |                        |                      |            |                              |           |            |                        |                      |           |       |
| PG0535  |        | 4.23 E-1                                                             | 6.8       | 4          | 0.7751                 | 3.4390               | Y          | 3.5 E-2                      | 6.05 E+6  | 3.28 E+6   | 0.8844                 | 23.1522              | Y         |       |
| PGN1436 | PG0488 | <i>conserved hypothetical protein</i>                                |           |            |                        |                      |            |                              |           |            |                        |                      |           |       |
| PG0534  |        | 1.76 E-5                                                             | 8.6       | 40         | -2.2249                | 5.6016               | G          | 1.62 E-12                    | 3.3 E+6   | 1.49 E+7   | -2.1780                | 24.1202              | G         |       |
| PGN1437 | PG0487 | <i>hypothetical protein PG_0534</i>                                  |           |            |                        |                      |            |                              |           |            |                        |                      |           |       |
| PG0532  |        | 4.4 E-1                                                              | 1.7       | 3.5        | -1.0323                | 2.3816               | Y          | 2.84 E-2                     | 1.85 E+3  | 1.15 E+6   | -9.2795                | 20.1355              | Y         |       |
| PGN1440 | PG0486 | <i>conserved domain protein</i>                                      |           |            |                        |                      |            |                              |           |            |                        |                      |           |       |
| PG0531  |        | 7.86 E-5                                                             | 82.1      | 35.5       | 1.2103                 | 6.8783               | R          | 6.61 E-2                     | 3.18 E+7  | 2.34 E+7   | 0.4388                 | 25.7181              | R         |       |
| PGN1441 | PG0485 | <i>nadE glutamine-dependent NAD+ synthetase</i>                      |           |            |                        |                      |            |                              |           |            |                        |                      |           |       |
| PG0530  |        | 7.93 E-2                                                             | 26.5      | 13.5       | 0.9744                 | 5.3228               | Y          | 5.58 E-5                     | 1.82 E+7  | 7.72 E+6   | 1.2355                 | 24.6259              | R         |       |
| PGN1443 | PG0484 | <i>carB carbamoyl-phosphate synthase large subunit</i>               |           |            |                        |                      |            |                              |           |            |                        |                      |           |       |
| PG0529  |        | 1.04 E-2                                                             | 2.6       | 14         | -2.4473                | 4.0502               | Y          | 6.88 E-6                     | 9.86 E+5  | 7.82 E+6   | -2.9879                | 23.0700              | G         |       |
| PGN1444 | PG0482 | <i>carA carbamoyl-phosphate synthase small subunit</i>               |           |            |                        |                      |            |                              |           |            |                        |                      |           |       |
| PG0528  |        | 5.08 E-2                                                             | 28.2      | 13.5       | 1.0646                 | 5.3832               | Y          | 3.1 E-5                      | 1.04 E+7  | 4.24 E+6   | 1.2882                 | 23.7996              | R         |       |
| PGN1445 | PG0481 | <i>amidophosphoribosyltransferase putative</i>                       |           |            |                        |                      |            |                              |           |            |                        |                      |           |       |

| TIGR    |        | PP PPC / Pg Spectral Count                          |           |            |                        |                      |            | PP PPC/ Pg Protein Intensity |           |            |                        |                      |           | 33277 |
|---------|--------|-----------------------------------------------------|-----------|------------|------------------------|----------------------|------------|------------------------------|-----------|------------|------------------------|----------------------|-----------|-------|
| PGN     | LANL   | q-value                                             | PP (Norm) | PPC (Norm) | log <sub>2</sub> Ratio | log <sub>2</sub> Sum | Regulation | q-value                      | PP (Norm) | PPC (Norm) | log <sub>2</sub> Ratio | log <sub>2</sub> Sum | Consensus |       |
| PG0526  |        | 1.41 E-6                                            | 24.8      | 1          | 4.6331                 | 4.6901               | R          | 0                            | 9.83 E+6  | 1 E+3      | 13.2635                | 23.2294              | R         |       |
| PGN1446 | PG0480 | <i>membrane protein putative</i>                    |           |            |                        |                      |            |                              |           |            |                        |                      |           |       |
| PG0525  |        | 4.5 E-1                                             | 29.1      | 23.5       | 0.3080                 | 5.7168               | Y          | 1.33 E-6                     | 1.33 E+7  | 5.2 E+6    | 1.3581                 | 24.1441              | R         |       |
| PGN1447 | PG0479 | <i>pyrG CTP synthase</i>                            |           |            |                        |                      |            |                              |           |            |                        |                      |           |       |
| PG0523  |        | 1.21 E-2                                            | 127.5     | 85.5       | 0.5764                 | 7.7347               | Y          | 8.93 E-3                     | 4.09 E+7  | 5.47 E+7   | -0.4212                | 26.5107              | Y         |       |
| PGN1449 | PG0477 | <i>guaB inosine-5'-monophosphate dehydrogenase</i>  |           |            |                        |                      |            |                              |           |            |                        |                      |           |       |
| PG0521  |        | 3.86 E-1                                            | 70.2      | 82         | -0.2249                | 7.2495               | Y          | 1.46 E-1                     | 1.5 E+8   | 1.64 E+8   | -0.1314                | 28.2279              | Y         |       |
| PGN1451 | PG0475 | <i>groES chaperonin 10 kDa</i>                      |           |            |                        |                      |            |                              |           |            |                        |                      |           |       |
| PG0520  |        | 0                                                   | 779.5     | 384.5      | 1.0196                 | 10.1849              | R          | 1.01 E-15                    | 5.51 E+8  | 2.76 E+8   | 1.0004                 | 29.6230              | R         |       |
| PGN1452 | PG0474 | <i>groEL chaperonin 60 kDa</i>                      |           |            |                        |                      |            |                              |           |            |                        |                      |           |       |
| PG0517  |        | 3.05 E-1                                            | 3.4       | 1          | 1.7751                 | 2.1449               | Y          | 0                            | 7.61 E+5  | 1 E+3      | 9.5712                 | 19.5389              | R         |       |
| PGN1455 | PG0471 | <i>hypothetical protein PG_0517</i>                 |           |            |                        |                      |            |                              |           |            |                        |                      |           |       |
| PG0516  |        | 1.45 E-1                                            | 5.1       | 1          | 2.3601                 | 2.6168               | Y          | 0                            | 9.33 E+5  | 1 E+3      | 9.8654                 | 19.8327              | R         |       |
| PGN1456 | PG0470 | <i>conserved hypothetical protein</i>               |           |            |                        |                      |            |                              |           |            |                        |                      |           |       |
| PG0515  |        | 6.22 E-1                                            | 18.0      | 16         | 0.1674                 | 5.0861               | Y          | 3.86 E-4                     | 1.2 E+7   | 3.61 E+6   | 1.7289                 | 23.8942              | R         |       |
| PGN1457 | PG0469 | <i>conserved hypothetical protein</i>               |           |            |                        |                      |            |                              |           |            |                        |                      |           |       |
| PG0514  |        | 2.95 E-10                                           | 160.9     | 62.5       | 1.3639                 | 7.8032               | R          | 0                            | 8.47 E+7  | 2.1 E+7    | 2.0100                 | 26.6555              | R         |       |
| PGN1458 | PG0468 | <i>secA preprotein translocase SecA subunit</i>     |           |            |                        |                      |            |                              |           |            |                        |                      |           |       |
| PG0513  |        | 9.48 E-2                                            | 1.7       | 7.5        | -2.1318                | 3.2034               | Y          | 1.34 E-4                     | 1.85 E+3  | 1.11 E+6   | -9.2318                | 20.0879              | G         |       |
| PGN1459 | PG0467 | <i>conserved hypothetical protein TIGR00255</i>     |           |            |                        |                      |            |                              |           |            |                        |                      |           |       |
| PG0510  |        | 6.69 E-1                                            | 1.7       | 1.5        | 0.1901                 | 1.6832               | Y          | 0                            | 1.85 E+3  | 2 E+5      | -6.7581                | 17.6250              | Y         |       |
| PGN1462 | PG0464 | <i>conserved hypothetical protein</i>               |           |            |                        |                      |            |                              |           |            |                        |                      |           |       |
| PG0506  |        | 6.68 E-1                                            | 1976.6    | 1962.5     | 0.0103                 | 11.9436              | Y          | 3.96 E-2                     | 1.11 E+9  | 1.29 E+9   | -0.2168                | 31.1552              | Y         |       |
| PGN1466 | PG0461 | <i>prtR11 arginine-specific cysteine proteinase</i> |           |            |                        |                      |            |                              |           |            |                        |                      |           |       |
| PG0504  |        | 3.21 E-1                                            | 1.7       | 4.5        | -1.3948                | 2.6349               | Y          | 3.01 E-4                     | 1.85 E+3  | 6.86 E+5   | -8.5348                | 19.3924              | G         |       |
| PGN1468 | PG0460 | <i>lipA lipoate synthase</i>                        |           |            |                        |                      |            |                              |           |            |                        |                      |           |       |
| PG0503  |        | 5.76 E-5                                            | 39.4      | 89         | -1.1771                | 7.0041               | G          | 1.33 E-4                     | 2.26 E+7  | 4.65 E+7   | -1.0434                | 26.0422              | G         |       |
| PGN1469 | PG0459 | <i>dpp dipeptidyl aminopeptidase IV</i>             |           |            |                        |                      |            |                              |           |            |                        |                      |           |       |
| PG0502  |        | 1.45 E-1                                            | 5.1       | 1          | 2.3601                 | 2.6168               | Y          | 1.44 E-5                     | 4.13 E+5  | 1 E+3      | 8.6913                 | 18.6606              | R         |       |
| PGN1470 | PG0458 | <i>smpB SsrA-binding protein</i>                    |           |            |                        |                      |            |                              |           |            |                        |                      |           |       |
| PG0500  |        | 1.7 E-1                                             | 14.5      | 7          | 1.0552                 | 4.4294               | Y          | 5.26 E-2                     | 4.2 E+6   | 2.77 E+6   | 0.6012                 | 22.7333              | Y         |       |
| PGN1472 | PG0456 | <i>tgt queuine tRNA-ribosyltransferase</i>          |           |            |                        |                      |            |                              |           |            |                        |                      |           |       |
| PG0498  |        | 6.69 E-1                                            | 5.1       | 4.5        | 0.1901                 | 3.2681               | Y          | 1.85 E-1                     | 1.27 E+6  | 1.3 E+6    | -0.0435                | 21.2933              | Y         |       |
| PGN1474 | PG0454 | <i>luxS autoinducer-2 production protein LuxS</i>   |           |            |                        |                      |            |                              |           |            |                        |                      |           |       |



| TIGR    |        | PP PPC / Pg Spectral Count                                            |           |            |                        |                      |                                                                                                                                                                             | PP PPC/ Pg Protein Intensity |           |            |                        |                      |                                                                                         | 33277 |
|---------|--------|-----------------------------------------------------------------------|-----------|------------|------------------------|----------------------|-----------------------------------------------------------------------------------------------------------------------------------------------------------------------------|------------------------------|-----------|------------|------------------------|----------------------|-----------------------------------------------------------------------------------------|-------|
| PGN     | LANL   | q-value                                                               | PP (Norm) | PPC (Norm) | log <sub>2</sub> Ratio | log <sub>2</sub> Sum | Regulation                                                                                                                                                                  | q-value                      | PP (Norm) | PPC (Norm) | log <sub>2</sub> Ratio | log <sub>2</sub> Sum | Consensus                                                                               |       |
| PG0497  |        | 6.69 E-1                                                              | 1.7       | 2          | -0.2249                | 1.8919               | Y   G     | 1.57 E-7                     | 1.85 E+3  | 2.51 E+5   | -7.0840                | 17.9483              | G    |       |
| PGN1475 | PG0453 | <i>mnt 5'-methylthioadenosine/S-adenosylhomocysteine nucleosidase</i> |           |            |                        |                      |                                                                                                                                                                             |                              |           |            |                        |                      |                                                                                         |       |
| PG0495  |        | 8.44 E-2                                                              | 4.3       | 12.5       | -1.5468                | 4.0685               | Y   G     | 2.09 E-5                     | 1.15 E+6  | 3.85 E+6   | -1.7364                | 22.2534              | G    |       |
| PGN1476 | PG0452 | <i>hypothetical protein PG_0495</i>                                   |           |            |                        |                      |                                                                                                                                                                             |                              |           |            |                        |                      |                                                                                         |       |
| PG0491  |        | 2.44 E-1                                                              | 353.4     | 391.5      | -0.1478                | 9.5409               | Y   Y     | 1.81 E-1                     | 3.53 E+8  | 3.47 E+8   | 0.0230                 | 29.3819              | Y    |       |
| PGN1479 | PG0449 | <i>conserved hypothetical protein</i>                                 |           |            |                        |                      |                                                                                                                                                                             |                              |           |            |                        |                      |                                                                                         |       |
| PG0490  |        | 1.45 E-1                                                              | 5.1       | 1          | 2.3601                 | 2.6168               | Y   R     | 0                            | 3.37 E+6  | 1 E+3      | 11.7167                | 21.6829              | R    |       |
| PGN1480 | PG0448 | <i>membrane protein putative</i>                                      |           |            |                        |                      |                                                                                                                                                                             |                              |           |            |                        |                      |                                                                                         |       |
| PG0488  |        | 6.61 E-1                                                              | 9.4       | 10.5       | -0.1578                | 4.3156               | Y   Y     | 2.06 E-2                     | 2.38 E+6  | 4.17 E+6   | -0.8069                | 22.6447              | Y    |       |
| PGN1482 | PG0446 | <i>ruvB Holliday junction DNA helicase RuvB</i>                       |           |            |                        |                      |                                                                                                                                                                             |                              |           |            |                        |                      |                                                                                         |       |
| PG0486  |        | 3.82 E-1                                                              | 1.7       | 4          | -1.2249                | 2.5138               | Y   G     | 1.28 E-4                     | 1.85 E+3  | 1.84 E+6   | -9.9579                | 20.8131              | G    |       |
| PGN1484 | PG0444 | <i>ogt methylated-DNA--protein-cysteine S-methyltransferase</i>       |           |            |                        |                      |                                                                                                                                                                             |                              |           |            |                        |                      |                                                                                         |       |
| PG0485  |        | 2.32 E-1                                                              | 42.8      | 57         | -0.4139                | 6.6407               | Y   Y     | 9.87 E-2                     | 1.51 E+7  | 1.77 E+7   | -0.2363                | 24.9667              | Y    |       |
| PGN1485 | PG0443 | <i>yajC preprotein translocase YajC subunit</i>                       |           |            |                        |                      |                                                                                                                                                                             |                              |           |            |                        |                      |                                                                                         |       |
| PG0484  |        | 4.23 E-1                                                              | 2.6       | 1          | 1.3601                 | 1.8347               | Y   R     | 1.87 E-7                     | 8.48 E+5  | 1 E+3      | 9.7284                 | 19.6959              | R    |       |
| PGN1486 | PG0442 | <i>hypothetical protein PG_0484</i>                                   |           |            |                        |                      |                                                                                                                                                                             |                              |           |            |                        |                      |                                                                                         |       |
| PG0482  |        | 6.64 E-1                                                              | 13.7      | 12.5       | 0.1312                 | 4.7110               | Y   Y     | 3.9 E-2                      | 7.17 E+6  | 3.71 E+6   | 0.9482                 | 23.3750              | Y    |       |
| PGN1488 | PG0440 | <i>hypothetical protein PG_0482</i>                                   |           |            |                        |                      |                                                                                                                                                                             |                              |           |            |                        |                      |                                                                                         |       |
| PG0481  |        | 0                                                                     | 367.9     | 122        | 1.5926                 | 8.9364               | R   R     | 1.84 E-6                     | 1.9 E+8   | 1.01 E+8   | 0.9065                 | 28.1189              | R    |       |
| PGN1489 | PG0439 | <i>kbl 2-amino-3-ketobutyrate CoA ligase</i>                          |           |            |                        |                      |                                                                                                                                                                             |                              |           |            |                        |                      |                                                                                         |       |
| PG0477  |        | 4.14 E-1                                                              | 36.8      | 29.5       | 0.3187                 | 6.0508               | Y   R     | 1.42 E-5                     | 1.63 E+7  | 8.82 E+6   | 0.8862                 | 24.5830              | R    |       |
| PGN1492 | PG0436 | <i>panC pantoate--beta-alanine ligase</i>                             |           |            |                        |                      |                                                                                                                                                                             |                              |           |            |                        |                      |                                                                                         |       |
| PG0476  |        | 4.75 E-1                                                              | 18.0      | 22.5       | -0.3244                | 5.3387               | Y   Y | 9.88 E-2                     | 9.27 E+6  | 7.61 E+6   | 0.2832                 | 24.0089              | Y  |       |
| PGN1493 | PG0435 | <i>yngK-2 yngK protein</i>                                            |           |            |                        |                      |                                                                                                                                                                             |                              |           |            |                        |                      |                                                                                         |       |
| PG0474  |        | 6.69 E-1                                                              | 1.7       | 2          | -0.2249                | 1.8919               | Y   Y | 1.05 E-1                     | 4.32 E+5  | 6.36 E+5   | -0.5581                | 20.0267              | Y  |       |
| PGN1495 | PG0433 | <i>low-specificity L-threonine aldolase</i>                           |           |            |                        |                      |                                                                                                                                                                             |                              |           |            |                        |                      |                                                                                         |       |
| PG0471  |        | 6.69 E-1                                                              | 2.6       | 3          | -0.2249                | 2.4769               | Y   Y | 1.8 E-2                      | 1.04 E+6  | 3.99 E+6   | -1.9438                | 22.2600              | Y  |       |
| PGN1498 | PG0429 | <i>hypothetical protein PG_0471</i>                                   |           |            |                        |                      |                                                                                                                                                                             |                              |           |            |                        |                      |                                                                                         |       |
| PG0468  |        | 3.09 E-1                                                              | 9.4       | 5          | 0.9126                 | 3.8492               | Y   Y | 2.19 E-3                     | 4.31 E+6  | 2.38 E+6   | 0.8548                 | 22.6749              | Y  |       |
| PGN1501 | PG0427 | <i>manA mannose-6-phosphate isomerase class I</i>                     |           |            |                        |                      |                                                                                                                                                                             |                              |           |            |                        |                      |                                                                                         |       |
| PG0466  |        | 1.16 E-1                                                              | 5.1       | 13         | -1.3404                | 4.1806               | Y   Y | 1.57 E-2                     | 1.98 E+6  | 5.16 E+6   | -1.3814                | 22.7667              | Y  |       |
| PGN1502 | PG0426 | <i>hypothetical protein PG_0466</i>                                   |           |            |                        |                      |                                                                                                                                                                             |                              |           |            |                        |                      |                                                                                         |       |
| PG0465  |        | 6.05 E-2                                                              | 6.8       | 1          | 2.7751                 | 2.9718               | Y   R | 4.08 E-8                     | 2.08 E+6  | 1 E+3      | 11.0250                | 20.9915              | R  |       |
| PGN1503 | PG0425 | <i>fur ferric uptake transcriptional regulator</i>                    |           |            |                        |                      |                                                                                                                                                                             |                              |           |            |                        |                      |                                                                                         |       |



| TIGR    |        | PP PPC / Pg Spectral Count                                 |           |            |                        |                      |            | PP PPC/ Pg Protein Intensity |  |         |           |            |                        | 33277                |           |   |
|---------|--------|------------------------------------------------------------|-----------|------------|------------------------|----------------------|------------|------------------------------|--|---------|-----------|------------|------------------------|----------------------|-----------|---|
| PGN     | LANL   | q-value                                                    | PP (Norm) | PPC (Norm) | log <sub>2</sub> Ratio | log <sub>2</sub> Sum | Regulation |                              |  | q-value | PP (Norm) | PPC (Norm) | log <sub>2</sub> Ratio | log <sub>2</sub> Sum | Consensus |   |
| PG0464  |        | 3.01 E-1                                                   | 82.1      | 98.5       | -0.2620                | 7.4970               | Y          |                              |  | Y       | 1.36 E-1  | 6.39 E+7   | 6.77 E+7               | -0.0832              | 26.9720   | Y |
| PGN1504 | PG0424 | <i>purA adenylosuccinate synthetase</i>                    |           |            |                        |                      |            |                              |  |         |           |            |                        |                      |           |   |
| PG0463  |        | 6 E-1                                                      | 8.6       | 7          | 0.2897                 | 3.9594               | Y          |                              |  | R       | 6.37 E-4  | 2.67 E+6   | 9.68 E+5               | 1.4649               | 21.7955   | R |
| PGN1505 | PG0423 | <i>folC folypolyglutamate synthase</i>                     |           |            |                        |                      |            |                              |  |         |           |            |                        |                      |           |   |
| PG0462  |        | 2.51 E-6                                                   | 13.7      | 54.5       | -1.9931                | 6.0915               | G          |                              |  | G       | 6.92 E-6  | 8.87 E+6   | 2.4 E+7                | -1.4365              | 24.9709   | G |
| PGN1506 | PG0422 | <i>transporter putative</i>                                |           |            |                        |                      |            |                              |  |         |           |            |                        |                      |           |   |
| PG0452  |        | 3.11 E-4                                                   | 243.0     | 162.5      | 0.5805                 | 8.6636               | R          |                              |  | R       | 0         | 3.08 E+8   | 1.36 E+8               | 1.1782               | 28.7261   | R |
| PGN1510 | PG0414 | <i>conserved hypothetical protein</i>                      |           |            |                        |                      |            |                              |  |         |           |            |                        |                      |           |   |
| PG0451  |        | 6.69 E-1                                                   | 1.7       | 1.5        | 0.1901                 | 1.6832               | Y          |                              |  | G       | 0         | 1.85 E+3   | 1.18 E+5               | -5.9917              | 16.8679   | Y |
| PGN1511 | PG0413 | <i>CBS domain protein</i>                                  |           |            |                        |                      |            |                              |  |         |           |            |                        |                      |           |   |
| PG0450  |        | 3.82 E-1                                                   | 1.7       | 4          | -1.2249                | 2.5138               | Y          |                              |  | G       | 1.28 E-5  | 1.85 E+3   | 4.43 E+5               | -7.9019              | 18.7616   | G |
| PGN1512 | PG0412 | <i>hypothetical protein PG_0450</i>                        |           |            |                        |                      |            |                              |  |         |           |            |                        |                      |           |   |
| PG0449  |        | 2.61 E-9                                                   | 187.4     | 84         | 1.1576                 | 8.0842               | R          |                              |  | R       | 1.16 E-11 | 1.79 E+8   | 7.28 E+7               | 1.2966               | 27.9076   | R |
| PGN1513 | PG0411 | <i>TPR domain protein</i>                                  |           |            |                        |                      |            |                              |  |         |           |            |                        |                      |           |   |
| PG0448  |        | 2.24 E-8                                                   | 39.4      | 111.5      | -1.5022                | 7.2371               | G          |                              |  | G       | 5.49 E-14 | 1.13 E+7   | 5.32 E+7               | -2.2400              | 25.9432   | G |
| PGN1514 | PG0410 | <i>hypothetical protein PG_0448</i>                        |           |            |                        |                      |            |                              |  |         |           |            |                        |                      |           |   |
| PG0447  |        | 2.26 E-1                                                   | 6.0       | 2          | 1.5825                 | 2.9981               | Y          |                              |  | R       | 3.51 E-5  | 2.54 E+6   | 5.3 E+5                | 2.2611               | 21.5487   | R |
| PGN1515 | PG0409 | <i>conserved hypothetical protein</i>                      |           |            |                        |                      |            |                              |  |         |           |            |                        |                      |           |   |
| PG0446  |        | 4.23 E-1                                                   | 2.6       | 1          | 1.3601                 | 1.8347               | Y          |                              |  | R       | 0         | 3.8 E+5    | 1 E+3                  | 8.5708               | 18.5404   | R |
| PGN1516 | PG0408 | <i>thiF thiF protein</i>                                   |           |            |                        |                      |            |                              |  |         |           |            |                        |                      |           |   |
| PG0445  |        | 2.52 E-1                                                   | 57.3      | 73         | -0.3486                | 7.0260               | Y          |                              |  | Y       | 3.17 E-3  | 5.66 E+7   | 9.71 E+7               | -0.7788              | 27.1950   | Y |
| PGN1517 | PG0407 | <i>pepT peptidase T</i>                                    |           |            |                        |                      |            |                              |  |         |           |            |                        |                      |           |   |
| PG0444  |        | 6.06 E-1                                                   | 10.3      | 12         | -0.2249                | 4.4769               | Y          |                              |  | Y       | 7.97 E-2  | 8.14 E+6   | 6.97 E+6               | 0.2251               | 23.8488   | Y |
| PGN1518 | PG0406 | <i>oligopeptide transporter OPT family</i>                 |           |            |                        |                      |            |                              |  |         |           |            |                        |                      |           |   |
| PG0443  |        | 3.68 E-1                                                   | 92.4      | 79         | 0.2262                 | 7.4213               | Y          |                              |  | Y       | 1.76 E-2  | 6.76 E+7   | 4.84 E+7               | 0.4830               | 26.7902   | Y |
| PGN1519 | PG0405 | <i>hemagglutinin-related protein</i>                       |           |            |                        |                      |            |                              |  |         |           |            |                        |                      |           |   |
| PG0441  |        | 1.34 E-2                                                   | 1.7       | 11.5       | -2.7485                | 3.7237               | Y          |                              |  | G       | 3.96 E-8  | 1.85 E+3   | 1.89 E+6               | -9.9958              | 20.8509   | G |
| PGN1520 | PG0404 | <i>hypothetical protein PG_0441</i>                        |           |            |                        |                      |            |                              |  |         |           |            |                        |                      |           |   |
| PG0438  |        | 6.69 E-1                                                   | 1.7       | 1.5        | 0.1901                 | 1.6832               | Y          |                              |  | G       | 0         | 1.85 E+3   | 3.53 E+5               | -7.5771              | 18.4383   | Y |
| PGN1522 | PG0401 | <i>hypothetical protein PG_0438</i>                        |           |            |                        |                      |            |                              |  |         |           |            |                        |                      |           |   |
| PG0437  |        | 7.69 E-2                                                   | 8.6       | 2          | 2.0970                 | 3.4001               | Y          |                              |  | R       | 4.86 E-5  | 7.6 E+6    | 6.01 E+5               | 3.6611               | 22.9674   | R |
| PGN1523 | PG0400 | <i>polysaccharide export protein BexD/CtrA/VexA family</i> |           |            |                        |                      |            |                              |  |         |           |            |                        |                      |           |   |
| PG0436  |        | 1.18 E-1                                                   | 31.7      | 18.5       | 0.7751                 | 5.6484               | Y          |                              |  | Y       | 8.37 E-2  | 1.31 E+7   | 1.62 E+7               | -0.3082              | 24.8042   | Y |
| PGN1524 | PG0399 | <i>capsular polysaccharide transport protein putative</i>  |           |            |                        |                      |            |                              |  |         |           |            |                        |                      |           |   |

| TIGR    |        | PP PPC / Pg Spectral Count                                      |           |            |                        |                      |            | PP PPC/ Pg Protein Intensity |  |         |           |            |                        | 33277                |           |   |
|---------|--------|-----------------------------------------------------------------|-----------|------------|------------------------|----------------------|------------|------------------------------|--|---------|-----------|------------|------------------------|----------------------|-----------|---|
| PGN     | LANL   | q-value                                                         | PP (Norm) | PPC (Norm) | log <sub>2</sub> Ratio | log <sub>2</sub> Sum | Regulation |                              |  | q-value | PP (Norm) | PPC (Norm) | log <sub>2</sub> Ratio | log <sub>2</sub> Sum | Consensus |   |
| PG0435  |        | 1.5 E-1                                                         | 1.7       | 6.5        | -1.9253                | 3.0376               | Y          |                              |  | G       | 8 E-4     | 1.85 E+3   | 2.44 E+6               | -10.3676             | 21.2224   | G |
| PGN1525 | PG0398 | <i>capsular polysaccharide biosynthesis protein putative</i>    |           |            |                        |                      |            |                              |  |         |           |            |                        |                      |           |   |
| PG0434  |        | 5.17 E-1                                                        | 1.7       | 3          | -0.8099                | 2.2361               | Y          |                              |  | Y       | 1 E-2     | 1.85 E+3   | 3.77 E+5               | -7.6692              | 18.5300   | Y |
| PGN1526 | PG0397 | <i>hypothetical protein PG_0434</i>                             |           |            |                        |                      |            |                              |  |         |           |            |                        |                      |           |   |
| PG0433  |        | 5.72 E-1                                                        | 12.8      | 10.5       | 0.2897                 | 4.5444               | Y          |                              |  | Y       | 1.45 E-2  | 2.63 E+6   | 3.64 E+6               | -0.4697              | 22.5809   | Y |
| PGN1527 | PG0396 | <i>tetrapyrrole methylase family protein</i>                    |           |            |                        |                      |            |                              |  |         |           |            |                        |                      |           |   |
| PG0432  |        | 6 E-1                                                           | 3.4       | 4.5        | -0.3948                | 2.9860               | Y          |                              |  | Y       | 8.66 E-2  | 6.49 E+5   | 4.77 E+5               | 0.4438               | 20.1021   | Y |
| PGN1528 | PG0395 | <i>NOL1/NOP2/sun family protein</i>                             |           |            |                        |                      |            |                              |  |         |           |            |                        |                      |           |   |
| PG0430  |        | 1.75 E-3                                                        | 112.9     | 66         | 0.7751                 | 7.4834               | R          |                              |  | R       | 2.27 E-4  | 7.77 E+7   | 4.92 E+7               | 0.6599               | 26.9188   | R |
| PGN1529 | PG0394 | <i>oxidoreductase putative</i>                                  |           |            |                        |                      |            |                              |  |         |           |            |                        |                      |           |   |
| PG0429  |        | 0                                                               | 326.9     | 104        | 1.6521                 | 8.7511               | R          |                              |  | R       | 1.13 E-4  | 1.47 E+8   | 8.77 E+7               | 0.7447               | 27.8058   | R |
| PGN1530 | PG0393 | <i>pyruvate synthase</i>                                        |           |            |                        |                      |            |                              |  |         |           |            |                        |                      |           |   |
|         |        | 4 E-3                                                           | 23.1      | 6          | 1.9450                 | 4.8631               | R          |                              |  | R       | 5.6 E-7   | 2.32 E+7   | 8.24 E+6               | 1.4941               | 24.9073   | R |
| PGN1533 |        |                                                                 |           |            |                        |                      |            |                              |  |         |           |            |                        |                      |           |   |
|         |        | 5.43 E-1                                                        | 6.8       | 5          | 0.4532                 | 3.5662               | Y          |                              |  | Y       | 1.97 E-3  | 1.19 E+6   | 5.44 E+5               | 1.1304               | 20.7255   | Y |
| PGN1534 |        |                                                                 |           |            |                        |                      |            |                              |  |         |           |            |                        |                      |           |   |
|         |        | 1.6 E-1                                                         | 11.1      | 20.5       | -0.8820                | 4.9829               | Y          |                              |  | Y       | 1.61 E-1  | 5.83 E+6   | 5.48 E+6               | 0.0885               | 23.4308   | Y |
| PGN1535 |        |                                                                 |           |            |                        |                      |            |                              |  |         |           |            |                        |                      |           |   |
|         |        | 6.97 E-1                                                        | 3.4       | 3.5        | -0.0323                | 2.7913               | Y          |                              |  | Y       | 3.32 E-2  | 1.33 E+6   | 7.66 E+5               | 0.7915               | 20.9971   | Y |
| PGN1536 |        |                                                                 |           |            |                        |                      |            |                              |  |         |           |            |                        |                      |           |   |
|         |        | 4.4 E-1                                                         | 1.7       | 3.5        | -1.0323                | 2.3816               | Y          |                              |  | G       | 1.85 E-8  | 1.85 E+3   | 3.5 E+5                | -7.5614              | 18.4227   | G |
| PGN1538 |        |                                                                 |           |            |                        |                      |            |                              |  |         |           |            |                        |                      |           |   |
|         |        | 2.04 E-2                                                        | 4.3       | 16         | -1.9030                | 4.3419               | Y          |                              |  | Y       | 1.69 E-3  | 2.2 E+6    | 4.73 E+6               | -1.1033              | 22.7236   | Y |
| PGN1539 |        |                                                                 |           |            |                        |                      |            |                              |  |         |           |            |                        |                      |           |   |
| PG0540  |        | 5.43 E-1                                                        | 2.6       | 1.5        | 0.7751                 | 2.0240               | Y          |                              |  | R       | 0         | 2.31 E+6   | 3.39 E+5               | 2.7728               | 21.3395   | R |
| PGN1540 | PG0493 | <i>AcrB/AcrD/AcrF family protein</i>                            |           |            |                        |                      |            |                              |  |         |           |            |                        |                      |           |   |
| PG0423  |        | 3.52 E-1                                                        | 12.8      | 8          | 0.6820                 | 4.3809               | Y          |                              |  | R       | 4.53 E-8  | 1.17 E+7   | 4.62 E+6               | 1.3422               | 23.9607   | R |
| PGN1544 | PG0388 | <i>hypothetical protein PG_0423</i>                             |           |            |                        |                      |            |                              |  |         |           |            |                        |                      |           |   |
| PG0421  |        | 1.32 E-4                                                        | 28.2      | 5          | 2.4976                 | 5.0547               | R          |                              |  | R       | 6.33 E-11 | 1.14 E+7   | 2.03 E+6               | 2.4893               | 23.6810   | R |
| PGN1547 | PG0386 | <i>hypothetical protein PG_0421</i>                             |           |            |                        |                      |            |                              |  |         |           |            |                        |                      |           |   |
| PG0418  |        | 2.8 E-1                                                         | 40.2      | 52.5       | -0.3846                | 6.5347               | Y          |                              |  | Y       | 1.83 E-2  | 2.81 E+7   | 3.94 E+7               | -0.4877              | 26.0076   | Y |
| PGN1549 | PG0384 | <i>clpP ATP-dependent Clp protease proteolytic subunit</i>      |           |            |                        |                      |            |                              |  |         |           |            |                        |                      |           |   |
| PG0417  |        | 4.45 E-1                                                        | 6.0       | 9          | -0.5875                | 3.9059               | Y          |                              |  | Y       | 2.59 E-2  | 1.74 E+6   | 2.92 E+6               | -0.7454              | 22.1537   | Y |
| PGN1550 | PG0382 | <i>clpX ATP-dependent Clp protease ATP-binding subunit ClpX</i> |           |            |                        |                      |            |                              |  |         |           |            |                        |                      |           |   |

| TIGR    |        | PP PPC / Pg Spectral Count                             |           |            |                        |                      |            | PP PPC/ Pg Protein Intensity |  |         |           |            |                        | 33277                |           |   |
|---------|--------|--------------------------------------------------------|-----------|------------|------------------------|----------------------|------------|------------------------------|--|---------|-----------|------------|------------------------|----------------------|-----------|---|
| PGN     | LANL   | q-value                                                | PP (Norm) | PPC (Norm) | log <sub>2</sub> Ratio | log <sub>2</sub> Sum | Regulation |                              |  | q-value | PP (Norm) | PPC (Norm) | log <sub>2</sub> Ratio | log <sub>2</sub> Sum | Consensus |   |
| PG0416  |        | 8.91 E-2                                               | 34.2      | 19.5       | 0.8116                 | 5.7476               | Y          |                              |  | Y       | 4.97 E-3  | 1.34 E+7   | 6.83 E+6               | 0.9689               | 24.2683   | Y |
| PGN1551 | PG0381 | <i>recQ-1 ATP-dependent DNA helicase RecQ</i>          |           |            |                        |                      |            |                              |  |         |           |            |                        |                      |           |   |
| PG0415  |        | 1.63 E-8                                               | 48.8      | 6.5        | 2.9075                 | 5.7885               | R          |                              |  | R       | 0         | 2.15 E+7   | 3.49 E+6               | 2.6203               | 24.5729   | R |
| PGN1552 | PG0380 | <i>peptidyl-prolyl cis-trans isomerase PPIC-type</i>   |           |            |                        |                      |            |                              |  |         |           |            |                        |                      |           |   |
| PG0414  |        | 9.48 E-2                                               | 1.7       | 7.5        | -2.1318                | 3.2034               | Y          |                              |  | G       | 1.72 E-8  | 1.85 E+3   | 1.52 E+6               | -9.6863              | 20.5417   | G |
| PGN1553 | PG0379 | <i>hypothetical protein PG_0414</i>                    |           |            |                        |                      |            |                              |  |         |           |            |                        |                      |           |   |
| PG0413  |        | 6.69 E-1                                               | 1.7       | 2          | -0.2249                | 1.8919               | Y          |                              |  | G       | 1.79 E-13 | 1.85 E+3   | 2.31 E+5               | -6.9630              | 17.8282   | G |
| PGN1554 | PG0378 | <i>hypothetical protein PG_0413</i>                    |           |            |                        |                      |            |                              |  |         |           |            |                        |                      |           |   |
| PG0412  |        | 2.74 E-1                                               | 1.7       | 5          | -1.5468                | 2.7466               | Y          |                              |  | G       | 6.76 E-5  | 3.93 E+4   | 1.34 E+6               | -5.0912              | 20.3963   | G |
| PGN1555 | PG0377 | <i>mutL DNA mismatch repair protein MutL</i>           |           |            |                        |                      |            |                              |  |         |           |            |                        |                      |           |   |
| PG0411  |        | 6.33 E-1                                               | 12.8      | 14.5       | -0.1760                | 4.7727               | Y          |                              |  | Y       | 1.21 E-1  | 4.61 E+6   | 5.26 E+6               | -0.1903              | 23.2344   | Y |
| PGN1556 | PG0376 | <i>hemagglutinin putative</i>                          |           |            |                        |                      |            |                              |  |         |           |            |                        |                      |           |   |
| PG0409  |        | 3.53 E-6                                               | 38.5      | 96         | -1.3180                | 7.0715               | G          |                              |  | G       | 2.24 E-5  | 1.81 E+7   | 4.87 E+7               | -1.4268              | 25.9934   | G |
| PGN1557 | PG0373 | <i>hypothetical protein PG_0409</i>                    |           |            |                        |                      |            |                              |  |         |           |            |                        |                      |           |   |
| PG0401  |        | 6.35 E-1                                               | 65.0      | 61.5       | 0.0805                 | 6.9833               | Y          |                              |  | Y       | 9.98 E-2  | 3.6 E+7    | 2.96 E+7               | 0.2830               | 25.9681   | Y |
| PGN1564 | PG0368 | <i>KH/HDIG domain protein</i>                          |           |            |                        |                      |            |                              |  |         |           |            |                        |                      |           |   |
| PG0400  |        | 2.22 E-1                                               | 7.7       | 3          | 1.3601                 | 3.4197               | Y          |                              |  | R       | 8.86 E-8  | 1.01 E+6   | 4.82 E+5               | 1.0731               | 20.5124   | R |
| PGN1565 | PG0367 | <i>conserved hypothetical protein</i>                  |           |            |                        |                      |            |                              |  |         |           |            |                        |                      |           |   |
| PG0398  |        | 5.17 E-1                                               | 7.7       | 5.5        | 0.4856                 | 3.7226               | Y          |                              |  | R       | 9.34 E-6  | 1.14 E+6   | 3.37 E+5               | 1.7623               | 20.4985   | R |
| PGN1567 | PG0365 | <i>recF recF protein</i>                               |           |            |                        |                      |            |                              |  |         |           |            |                        |                      |           |   |
| PG0395  |        | 0                                                      | 348.3     | 103.5      | 1.7505                 | 8.8194               | R          |                              |  | R       | 0         | 2.69 E+8   | 5.1 E+7                | 2.3992               | 28.2542   | R |
| PGN1570 | PG0361 | <i>rpoC DNA-directed RNA polymerase beta' subunit</i>  |           |            |                        |                      |            |                              |  |         |           |            |                        |                      |           |   |
| PG0394  |        | 0                                                      | 262.7     | 68.5       | 1.9392                 | 8.3715               | R          |                              |  | R       | 0         | 1.82 E+8   | 2.99 E+7               | 2.6101               | 27.6620   | R |
| PGN1571 | PG0360 | <i>rpoB DNA-directed RNA polymerase beta subunit</i>   |           |            |                        |                      |            |                              |  |         |           |            |                        |                      |           |   |
| PG0393  |        | 2.04 E-1                                               | 432.1     | 388.5      | 0.1535                 | 9.6805               | Y          |                              |  | Y       | 2.02 E-1  | 8.05 E+8   | 8.05 E+8               | -0.0005              | 30.5839   | Y |
| PGN1572 | PG0359 | <i>rpL ribosomal protein L7/L12</i>                    |           |            |                        |                      |            |                              |  |         |           |            |                        |                      |           |   |
| PG0392  |        | 6.8 E-2                                                | 251.6     | 205.5      | 0.2918                 | 8.8362               | Y          |                              |  | R       | 2.37 E-4  | 1.88 E+8   | 1.2 E+8                | 0.6434               | 28.2008   | R |
| PGN1573 | PG0358 | <i>rpL ribosomal protein L10</i>                       |           |            |                        |                      |            |                              |  |         |           |            |                        |                      |           |   |
| PG0391  |        | 0                                                      | 308.9     | 65.5       | 2.2375                 | 8.5484               | R          |                              |  | R       | 3.98 E-11 | 1.87 E+8   | 7.24 E+7               | 1.3675               | 27.9499   | R |
| PGN1574 | PG0357 | <i>rpL ribosomal protein L1</i>                        |           |            |                        |                      |            |                              |  |         |           |            |                        |                      |           |   |
| PG0390  |        | 1.89 E-3                                               | 87.3      | 47         | 0.8929                 | 7.0691               | R          |                              |  | Y       | 1.12 E-2  | 1.36 E+8   | 9.63 E+7               | 0.5028               | 27.7947   | R |
| PGN1575 | PG0356 | <i>rpL ribosomal protein L11</i>                       |           |            |                        |                      |            |                              |  |         |           |            |                        |                      |           |   |
| PG0389  |        | 3.11 E-4                                               | 52.2      | 19         | 1.4579                 | 6.1537               | R          |                              |  | R       | 1.87 E-12 | 2.54 E+7   | 6.38 E+6               | 1.9944               | 24.9235   | R |
| PGN1576 | PG0355 | <i>nusG transcription antitermination protein NusG</i> |           |            |                        |                      |            |                              |  |         |           |            |                        |                      |           |   |

| TIGR    |        | PP PPC / Pg Spectral Count                                                                  |           |            |                        |                      |            |  | PP PPC/ Pg Protein Intensity |         |           |            |                        | 33277                |           |   |
|---------|--------|---------------------------------------------------------------------------------------------|-----------|------------|------------------------|----------------------|------------|--|------------------------------|---------|-----------|------------|------------------------|----------------------|-----------|---|
| PGN     | LANL   | q-value                                                                                     | PP (Norm) | PPC (Norm) | log <sub>2</sub> Ratio | log <sub>2</sub> Sum | Regulation |  |                              | q-value | PP (Norm) | PPC (Norm) | log <sub>2</sub> Ratio | log <sub>2</sub> Sum | Consensus |   |
|         |        | 4.02 E-1                                                                                    | 10.3      | 6.5        | 0.6596                 | 4.0676               | Y          |  |                              | Y       | 3.87 E-2  | 9.35 E+6   | 6.31 E+6               | 0.5680               | 23.9003   | Y |
| PGN1577 |        |                                                                                             |           |            |                        |                      |            |  |                              |         |           |            |                        |                      |           |   |
| PG0387  |        | 0                                                                                           | 1491.4    | 695.5      | 1.1005                 | 11.0947              | R          |  |                              | R       | 0         | 2.28 E+9   | 9.23 E+8               | 1.3054               | 31.5780   | R |
| PGN1578 | PG0353 | <i>tuf translation elongation factor Tu</i>                                                 |           |            |                        |                      |            |  |                              |         |           |            |                        |                      |           |   |
| PG0386  |        | 1.34 E-4                                                                                    | 38.5      | 10         | 1.9450                 | 5.6000               | R          |  |                              | R       | 3.13 E-13 | 4.37 E+7   | 4.62 E+6               | 3.2413               | 25.5253   | R |
| PGN1579 | PG0352 | <i>site-specific recombinase phage integrase family/ribosomal subunit interface protein</i> |           |            |                        |                      |            |  |                              |         |           |            |                        |                      |           |   |
| PG0384  |        | 6 E-1                                                                                       | 4.3       | 5.5        | -0.3624                | 3.2896               | Y          |  |                              | Y       | 1.95 E-1  | 1.32 E+6   | 1.3 E+6                | 0.0278               | 21.3202   | Y |
| PGN1581 | PG0350 | <i>MutS2 family protein</i>                                                                 |           |            |                        |                      |            |  |                              |         |           |            |                        |                      |           |   |
| PG0383  |        | 1.52 E-2                                                                                    | 9.4       | 1          | 3.2345                 | 3.3802               | Y          |  |                              | R       | 0         | 2.6 E+6    | 1 E+3                  | 11.3440              | 21.3103   | R |
| PGN1582 | PG0349 | <i>membrane-associated zinc metalloprotease putative</i>                                    |           |            |                        |                      |            |  |                              |         |           |            |                        |                      |           |   |
| PG0380  |        | 1.26 E-1                                                                                    | 2.6       | 8.5        | -1.7274                | 3.4682               | Y          |  |                              | Y       | 1.67 E-1  | 8.98 E+5   | 8.38 E+5               | 0.0996               | 20.7269   | Y |
| PGN1585 | PG0346 | <i>uvrB excinuclease ABC B subunit</i>                                                      |           |            |                        |                      |            |  |                              |         |           |            |                        |                      |           |   |
| PG0378  |        | 0                                                                                           | 195.9     | 38         | 2.3664                 | 7.8700               | R          |  |                              | R       | 0         | 1.8 E+8    | 3.34 E+7               | 2.4337               | 27.6704   | R |
| PGN1587 | PG0345 | <i>tsf translation elongation factor Ts</i>                                                 |           |            |                        |                      |            |  |                              |         |           |            |                        |                      |           |   |
| PG0377  |        | 0                                                                                           | 276.4     | 106        | 1.3826                 | 8.5788               | R          |  |                              | R       | 0         | 2.15 E+8   | 4.12 E+7               | 2.3839               | 27.9312   | R |
| PGN1588 | PG0344 | <i>rpsB ribosomal protein S2</i>                                                            |           |            |                        |                      |            |  |                              |         |           |            |                        |                      |           |   |
| PG0376  |        | 5.43 E-1                                                                                    | 21.4      | 25         | -0.2249                | 5.5358               | Y          |  |                              | Y       | 2.84 E-2  | 1.78 E+7   | 1.28 E+7               | 0.4727               | 24.8652   | Y |
| PGN1589 | PG0343 | <i>rpsL ribosomal protein S9</i>                                                            |           |            |                        |                      |            |  |                              |         |           |            |                        |                      |           |   |
| PG0375  |        | 2.87 E-1                                                                                    | 81.3      | 66         | 0.3006                 | 7.2025               | Y          |  |                              | R       | 1.84 E-5  | 4.32 E+7   | 1.84 E+7               | 1.2322               | 25.8751   | R |
| PGN1590 | PG0342 | <i>rplM ribosomal protein L13</i>                                                           |           |            |                        |                      |            |  |                              |         |           |            |                        |                      |           |   |
| PG0373  |        | 5.17 E-1                                                                                    | 1.7       | 3          | -0.8099                | 2.2361               | Y          |  |                              | Y       | 1.5 E-3   | 1.85 E+3   | 1.04 E+6               | -9.1288              | 19.9851   | Y |
| PGN1591 | PG0341 | <i>hypothetical protein PG_0373</i>                                                         |           |            |                        |                      |            |  |                              |         |           |            |                        |                      |           |   |
| PG0369  |        | 4.4 E-1                                                                                     | 1.7       | 3.5        | -1.0323                | 2.3816               | Y          |  |                              | G       | 0         | 1.85 E+3   | 5.58 E+5               | -8.2351              | 19.0935   | G |
| PGN1593 | PG0340 | <i>coaD phosphopantetheine adenylyltransferase</i>                                          |           |            |                        |                      |            |  |                              |         |           |            |                        |                      |           |   |
| PG0368  |        | 1.4 E-1                                                                                     | 14.5      | 6.5        | 1.1621                 | 4.3955               | Y          |  |                              | Y       | 2.5 E-3   | 6.44 E+6   | 2 E+6                  | 1.6860               | 23.0088   | Y |
| PGN1594 | PG0339 | <i>DNA topoisomerase IV B subunit putative</i>                                              |           |            |                        |                      |            |  |                              |         |           |            |                        |                      |           |   |
| PG0366  |        | 2.74 E-1                                                                                    | 8.6       | 4          | 1.0970                 | 3.6504               | Y          |  |                              | R       | 6.45 E-7  | 3.29 E+6   | 1.01 E+6               | 1.7055               | 22.0364   | R |
| PGN1595 | PG0338 | <i>hypothetical protein PG_0366</i>                                                         |           |            |                        |                      |            |  |                              |         |           |            |                        |                      |           |   |
| PG0365  |        | 5.39 E-1                                                                                    | 5.1       | 3.5        | 0.5527                 | 3.1100               | Y          |  |                              | R       | 2.92 E-4  | 1.66 E+6   | 5.2 E+5                | 1.6763               | 21.0567   | R |
| PGN1596 | PG0337 | <i>3'-5' exonuclease domain protein</i>                                                     |           |            |                        |                      |            |  |                              |         |           |            |                        |                      |           |   |
| PG0364  |        | 2.14 E-1                                                                                    | 3.4       | 8.5        | -1.3124                | 3.5756               | Y          |  |                              | Y       | 1.68 E-2  | 1.63 E+6   | 3.35 E+6               | -1.0406              | 22.2484   | Y |
| PGN1597 | PG0336 | <i>conserved hypothetical protein</i>                                                       |           |            |                        |                      |            |  |                              |         |           |            |                        |                      |           |   |
| PG0362  |        | 1.48 E-4                                                                                    | 6.8       | 32         | -2.2249                | 5.2797               | G          |  |                              | Y       | 5.91 E-3  | 5.32 E+6   | 1.03 E+7               | -0.9605              | 23.9008   | G |
| PGN1599 | PG0334 | <i>hypothetical protein PG_0362</i>                                                         |           |            |                        |                      |            |  |                              |         |           |            |                        |                      |           |   |

| TIGR    |        | PP PPC / Pg Spectral Count                                    |           |            |                        |                      |            | PP PPC/ Pg Protein Intensity |           |            |                        |                      |           | 33277 |
|---------|--------|---------------------------------------------------------------|-----------|------------|------------------------|----------------------|------------|------------------------------|-----------|------------|------------------------|----------------------|-----------|-------|
| PGN     | LANL   | q-value                                                       | PP (Norm) | PPC (Norm) | log <sub>2</sub> Ratio | log <sub>2</sub> Sum | Regulation | q-value                      | PP (Norm) | PPC (Norm) | log <sub>2</sub> Ratio | log <sub>2</sub> Sum | Consensus |       |
| PG0361  |        | 4.23 E-1                                                      | 3.4       | 6          | -0.8099                | 3.2361               | Y ●● Y     | 7.19 E-3                     | 8 E+5     | 1.83 E+6   | -1.1907                | 21.3238              | Y ●       |       |
| PGN1600 | PG0333 | <i>conserved domain protein</i>                               |           |            |                        |                      |            |                              |           |            |                        |                      |           |       |
| PG0360  |        | 5.84 E-4                                                      | 47.9      | 17.5       | 1.4532                 | 6.0316               | R ●● R     | 5.19 E-10                    | 2.92 E+7  | 9.06 E+6   | 1.6899                 | 25.1910              | R ●       |       |
| PGN1601 | PG0332 | <i>lemA protein</i>                                           |           |            |                        |                      |            |                              |           |            |                        |                      |           |       |
| PG0359  |        | 3.21 E-1                                                      | 1.7       | 4.5        | -1.3948                | 2.6349               | Y ●● G     | 4.4 E-8                      | 1.85 E+3  | 4.86 E+6   | -11.3588               | 22.2131              | G ●       |       |
| PGN1602 | PG0331 | <i>flavin reductase domain protein</i>                        |           |            |                        |                      |            |                              |           |            |                        |                      |           |       |
| PG0358  |        | 4.23 E-1                                                      | 2.6       | 1          | 1.3601                 | 1.8347               | Y ●● R     | 0                            | 2.64 E+5  | 1 E+3      | 8.0465                 | 18.0177              | R ●       |       |
| PGN1603 | PG0330 | <i>pyrI aspartate carbamoyltransferase regulatory subunit</i> |           |            |                        |                      |            |                              |           |            |                        |                      |           |       |
| PG0357  |        | 1.56 E-1                                                      | 28.2      | 42.5       | -0.5899                | 6.1444               | Y ●● Y     | 8.6 E-3                      | 9.98 E+6  | 1.63 E+7   | -0.7087                | 24.6485              | Y ●       |       |
| PGN1604 | PG0329 | <i>pyrB aspartate carbamoyltransferase catalytic subunit</i>  |           |            |                        |                      |            |                              |           |            |                        |                      |           |       |
| PG0356  |        | 2.15 E-1                                                      | 6.8       | 13.5       | -0.9798                | 4.3466               | Y ●● Y     | 2.89 E-2                     | 3.77 E+6  | 6.35 E+6   | -0.7500                | 23.2710              | Y ●       |       |
| PGN1605 | PG0328 | <i>conserved hypothetical protein</i>                         |           |            |                        |                      |            |                              |           |            |                        |                      |           |       |
| PG0352  |        | 3.82 E-1                                                      | 1.7       | 4          | -1.2249                | 2.5138               | Y ●● G     | 7.01 E-4                     | 1.85 E+3  | 1.3 E+6    | -9.4527                | 20.3085              | G ●       |       |
| PGN1608 | PG0324 | <i>sialidase putative</i>                                     |           |            |                        |                      |            |                              |           |            |                        |                      |           |       |
| PG0350  |        | 3.49 E-1                                                      | 24.0      | 32         | -0.4175                | 5.8063               | Y ●● Y     | 1.85 E-1                     | 2.15 E+7  | 2.1 E+7    | 0.0324                 | 25.3431              | Y ●       |       |
| PGN1611 | PG0322 | <i>internalin-related protein</i>                             |           |            |                        |                      |            |                              |           |            |                        |                      |           |       |
| PG0348  |        | 5.43 E-1                                                      | 2.6       | 1.5        | 0.7751                 | 2.0240               | Y ●● Y     | 1.83 E-2                     | 6.35 E+5  | 4.17 E+5   | 0.6058                 | 20.0047              | Y ●       |       |
| PGN1613 | PG0320 | <i>recG ATP-dependent DNA helicase RecG</i>                   |           |            |                        |                      |            |                              |           |            |                        |                      |           |       |
| PG0347  |        | 3.52 E-1                                                      | 32.5      | 24.5       | 0.4083                 | 5.8333               | Y ●● R     | 2.31 E-6                     | 1.76 E+7  | 7.7 E+6    | 1.1894                 | 24.5901              | R ●       |       |
| PGN1614 | PG0319 | <i>galE UDP-glucose 4-epimerase</i>                           |           |            |                        |                      |            |                              |           |            |                        |                      |           |       |
| PG0346  |        | 5.76 E-2                                                      | 10.3      | 2.5        | 2.0381                 | 3.6744               | Y ●● Y     | 5.66 E-3                     | 3.04 E+6  | 1.2 E+6    | 1.3382                 | 22.0165              | Y ●       |       |
| PGN1615 | PG0318 | <i>GTP-binding protein</i>                                    |           |            |                        |                      |            |                              |           |            |                        |                      |           |       |
| PG0345  |        | 3.05 E-1                                                      | 3.4       | 1          | 1.7751                 | 2.1449               | Y ●● R     | 1.12 E-11                    | 1.39 E+6  | 1 E+3      | 10.4407                | 20.4075              | R ●       |       |
| PGN1616 | PG0316 | <i>hypothetical protein PG_0345</i>                           |           |            |                        |                      |            |                              |           |            |                        |                      |           |       |
| PG0344  |        | 6.54 E-3                                                      | 6.8       | 23.5       | -1.7795                | 4.9234               | G ●● Y     | 8.76 E-3                     | 4.21 E+6  | 8.04 E+6   | -0.9310                | 23.5464              | G ●       |       |
| PGN1617 | PG0315 | <i>purple acid phosphatase</i>                                |           |            |                        |                      |            |                              |           |            |                        |                      |           |       |
| PG0343  |        | 1.63 E-11                                                     | 531.4     | 789.5      | -0.5712                | 10.3673              | G ●● Y     | 5.6 E-2                      | 2.73 E+8  | 3.18 E+8   | -0.2194                | 29.1384              | G ●       |       |
| PGN1618 | PG0314 | <i>megL methionine gamma-lyase</i>                            |           |            |                        |                      |            |                              |           |            |                        |                      |           |       |
| PG0339  |        | 4.4 E-1                                                       | 1.7       | 3.5        | -1.0323                | 2.3816               | Y ●● Y     | 5.42 E-2                     | 1.85 E+3  | 9.95 E+6   | -12.3929               | 23.2469              | Y ●       |       |
| PGN1622 | PG0313 | <i>hypothetical protein PG_0339</i>                           |           |            |                        |                      |            |                              |           |            |                        |                      |           |       |
| PG0338  |        | 4.23 E-1                                                      | 8.6       | 12.5       | -0.5468                | 4.3962               | Y ●● Y     | 1.13 E-1                     | 1.61 E+6  | 2.02 E+6   | -0.3295                | 21.7905              | Y ●       |       |
| PGN1623 | PG0312 | <i>hypothetical protein PG_0338</i>                           |           |            |                        |                      |            |                              |           |            |                        |                      |           |       |
| PG0336  |        | 5.43 E-1                                                      | 13.7      | 11         | 0.3157                 | 4.6259               | Y ●● R     | 8.93 E-9                     | 5.17 E+6  | 2.03 E+6   | 1.3476                 | 22.7790              | R ●       |       |
| PGN1625 | PG0311 | <i>hypothetical protein PG_0336</i>                           |           |            |                        |                      |            |                              |           |            |                        |                      |           |       |

| TIGR    |        | PP PPC / Pg Spectral Count                                 |           |            |                        |                      |            | PP PPC/ Pg Protein Intensity |  |         |           |            |                        | 33277                |           |   |
|---------|--------|------------------------------------------------------------|-----------|------------|------------------------|----------------------|------------|------------------------------|--|---------|-----------|------------|------------------------|----------------------|-----------|---|
| PGN     | LANL   | q-value                                                    | PP (Norm) | PPC (Norm) | log <sub>2</sub> Ratio | log <sub>2</sub> Sum | Regulation |                              |  | q-value | PP (Norm) | PPC (Norm) | log <sub>2</sub> Ratio | log <sub>2</sub> Sum | Consensus |   |
|         |        | 4.55 E-1                                                   | 5.1       | 3          | 0.7751                 | 3.0240               | Y          |                              |  | R       | 7.82 E-5  | 1.89 E+6   | 2.81 E+5               | 2.7497               | 21.0498   | R |
| PGN1627 |        |                                                            |           |            |                        |                      |            |                              |  |         |           |            |                        |                      |           |   |
| PG0334  |        | 2.66 E-1                                                   | 8.6       | 15         | -0.8099                | 4.5581               | Y          |                              |  | Y       | 1.34 E-1  | 4.2 E+6    | 3.68 E+6               | 0.1903               | 22.9111   | Y |
| PGN1628 | PG0309 | <i>glycosyl transferase group 2 family protein</i>         |           |            |                        |                      |            |                              |  |         |           |            |                        |                      |           |   |
| PG0332  |        | 1.89 E-3                                                   | 80.4      | 42         | 0.9374                 | 6.9358               | R          |                              |  | R       | 0         | 5.58 E+7   | 2.28 E+7               | 1.2919               | 26.2289   | R |
| PGN1630 | PG0307 | <i>rho transcription termination factor Rho</i>            |           |            |                        |                      |            |                              |  |         |           |            |                        |                      |           |   |
| PG0330  |        | 6.21 E-2                                                   | 62.5      | 89.5       | -0.5189                | 7.2476               | Y          |                              |  | Y       | 1.17 E-1  | 1.32 E+8   | 1.49 E+8               | -0.1755              | 28.0687   | Y |
| PGN1631 | PG0306 | <i>DNA-binding protein histone-like family</i>             |           |            |                        |                      |            |                              |  |         |           |            |                        |                      |           |   |
|         |        | 3.05 E-1                                                   | 3.4       | 1          | 1.7751                 | 2.1449               | Y          |                              |  | R       | 0         | 1.77 E+5   | 1 E+3                  | 7.4705               | 17.4444   | R |
| PGN1632 |        |                                                            |           |            |                        |                      |            |                              |  |         |           |            |                        |                      |           |   |
| PG0329  |        | 2.52 E-1                                                   | 160.0     | 185.5      | -0.2133                | 8.4326               | Y          |                              |  | Y       | 3.35 E-3  | 2.03 E+8   | 1.48 E+8               | 0.4601               | 28.3874   | Y |
| PGN1633 | PG0305 | <i>formiminotransferase-cyclodeaminase-related protein</i> |           |            |                        |                      |            |                              |  |         |           |            |                        |                      |           |   |
| PG0328  |        | 3.82 E-1                                                   | 41.9      | 51.5       | -0.2967                | 6.5458               | Y          |                              |  | Y       | 8.61 E-3  | 1.86 E+7   | 2.57 E+7               | -0.4680              | 25.3990   | Y |
| PGN1634 | PG0304 | <i>hutI imidazolonepropionase</i>                          |           |            |                        |                      |            |                              |  |         |           |            |                        |                      |           |   |
| PG0327  |        | 2.78 E-1                                                   | 12.0      | 6.5        | 0.8820                 | 4.2078               | Y          |                              |  | R       | 3.96 E-4  | 4.29 E+6   | 2.1 E+6                | 1.0315               | 22.6055   | R |
| PGN1635 | PG0303 | <i>hypothetical protein PG_0327</i>                        |           |            |                        |                      |            |                              |  |         |           |            |                        |                      |           |   |
| PG0326  |        | 4.57 E-3                                                   | 21.4      | 48         | -1.1660                | 6.1167               | G          |                              |  | G       | 1.14 E-7  | 6.69 E+6   | 1.75 E+7               | -1.3890              | 24.5294   | G |
| PGN1636 | PG0302 | <i>hypothetical protein PG_0326</i>                        |           |            |                        |                      |            |                              |  |         |           |            |                        |                      |           |   |
| PG0325  |        | 1.96 E-12                                                  | 100.1     | 234        | -1.2249                | 8.3842               | G          |                              |  | Y       | 1.66 E-1  | 5.76 E+7   | 5.55 E+7               | 0.0524               | 26.7537   | Y |
| PGN1637 | PG0301 | <i>conserved hypothetical protein</i>                      |           |            |                        |                      |            |                              |  |         |           |            |                        |                      |           |   |
| PG0324  |        | 5.87 E-2                                                   | 118.1     | 155        | -0.3925                | 8.0932               | Y          |                              |  | Y       | 2.44 E-2  | 7.46 E+7   | 9.83 E+7               | -0.3986              | 27.3655   | Y |
| PGN1638 | PG0299 | <i>hutH histidine ammonia-lyase</i>                        |           |            |                        |                      |            |                              |  |         |           |            |                        |                      |           |   |
| PG0323  |        | 8.6 E-7                                                    | 30.8      | 87.5       | -1.5062                | 6.8863               | G          |                              |  | Y       | 1.07 E-2  | 1.47 E+7   | 2.63 E+7               | -0.8390              | 25.2897   | G |
| PGN1639 | PG0297 | <i>conserved hypothetical protein</i>                      |           |            |                        |                      |            |                              |  |         |           |            |                        |                      |           |   |
| PG0321  |        | 7.53 E-2                                                   | 18.0      | 7.5        | 1.2605                 | 4.6707               | Y          |                              |  | Y       | 2.25 E-3  | 4.9 E+6    | 2.51 E+6               | 0.9675               | 22.8202   | Y |
| PGN1641 | PG0295 | <i>LAO/AO transport system ATPase</i>                      |           |            |                        |                      |            |                              |  |         |           |            |                        |                      |           |   |
| PG0320  |        | 6 E-1                                                      | 1.7       | 2.5        | -0.5468                | 2.0743               | Y          |                              |  | G       | 0         | 1.85 E+3   | 1.47 E+6               | -9.6371              | 20.4927   | G |
| PGN1642 | PG0294 | <i>hypothetical protein PG_0320</i>                        |           |            |                        |                      |            |                              |  |         |           |            |                        |                      |           |   |
| PG0319  |        | 6.36 E-5                                                   | 57.3      | 19.5       | 1.5558                 | 6.2636               | R          |                              |  | R       | 0         | 4.27 E+7   | 1.29 E+7               | 1.7282               | 25.7267   | R |
| PGN1643 | PG0293 | <i>hypothetical protein PG_0319</i>                        |           |            |                        |                      |            |                              |  |         |           |            |                        |                      |           |   |
| PG0317  |        | 1.1 E-1                                                    | 16.3      | 29         | -0.8350                | 5.5001               | Y          |                              |  | Y       | 2.15 E-2  | 6.05 E+6   | 1.64 E+7               | -1.4393              | 24.4218   | Y |
| PGN1645 | PG0291 | <i>peptidase M49 family</i>                                |           |            |                        |                      |            |                              |  |         |           |            |                        |                      |           |   |
| PG0316  |        | 1.76 E-1                                                   | 58.2      | 42         | 0.4702                 | 6.6465               | Y          |                              |  | Y       | 1.37 E-1  | 2.92 E+7   | 2.69 E+7               | 0.1185               | 25.7400   | Y |
| PGN1646 | PG0290 | <i>serS seryl-tRNA synthetase</i>                          |           |            |                        |                      |            |                              |  |         |           |            |                        |                      |           |   |

| TIGR    |        | PP PPC / Pg Spectral Count                                 |           |            |                        |                      |            | PP PPC/ Pg Protein Intensity |   |         |           |            |                        | 33277                |           |     |
|---------|--------|------------------------------------------------------------|-----------|------------|------------------------|----------------------|------------|------------------------------|---|---------|-----------|------------|------------------------|----------------------|-----------|-----|
| PGN     | LANL   | q-value                                                    | PP (Norm) | PPC (Norm) | log <sub>2</sub> Ratio | log <sub>2</sub> Sum | Regulation |                              |   | q-value | PP (Norm) | PPC (Norm) | log <sub>2</sub> Ratio | log <sub>2</sub> Sum | Consensus |     |
| PG0315  |        | 1.18 E-1                                                   | 10.3      | 3.5        | 1.5527                 | 3.7832               | Y          | ●                            | ● | Y       | 4.06 E-3  | 7.8 E+6    | 2.82 E+6               | 1.4694               | 23.3396   | Y ● |
| PGN1647 | PG0289 | <i>rpmA ribosomal protein L27</i>                          |           |            |                        |                      |            |                              |   |         |           |            |                        |                      |           |     |
| PG0314  |        | 5.1 E-2                                                    | 35.9      | 19         | 0.9195                 | 5.7797               | Y          | ●                            | ● | Y       | 1.44 E-1  | 2.74 E+7   | 2.52 E+7               | 0.1200               | 25.6508   | Y ● |
| PGN1648 | PG0288 | <i>rplU ribosomal protein L21</i>                          |           |            |                        |                      |            |                              |   |         |           |            |                        |                      |           |     |
| PG0311  |        | 5.89 E-1                                                   | 1.7       | 1          | 0.7751                 | 1.4390               | Y          | ●                            | ● | R       | 0         | 2.43 E+5   | 1 E+3                  | 7.9231               | 17.8949   | R ● |
| PGN1651 | PG0285 | <i>glycosyl transferase group 2 family protein</i>         |           |            |                        |                      |            |                              |   |         |           |            |                        |                      |           |     |
| PG0310  |        | 6 E-1                                                      | 31.7      | 35         | -0.1447                | 6.0587               | Y          | ●                            | ● | Y       | 5.72 E-2  | 1.47 E+7   | 1.95 E+7               | -0.4039              | 25.0296   | Y ● |
| PGN1652 | PG0284 | <i>nitroreductase family protein</i>                       |           |            |                        |                      |            |                              |   |         |           |            |                        |                      |           |     |
| PG0308  |        | 6.69 E-1                                                   | 1.7       | 1.5        | 0.1901                 | 1.6832               | Y          | ●                            | ● | G       | 0         | 1.85 E+3   | 6.77 E+6               | -11.8360             | 22.6901   | Y ● |
| PGN1654 | PG0281 | <i>electron transport complex RnfABCDGE type A subunit</i> |           |            |                        |                      |            |                              |   |         |           |            |                        |                      |           |     |
| PG0307  |        | 4.67 E-3                                                   | 1.7       | 13.5       | -2.9798                | 3.9271               | Y          | ●                            | ● | G       | 0         | 1.85 E+3   | 3.47 E+5               | -7.5502              | 18.4116   | G ● |
| PGN1655 | PG0280 | <i>electron transport complex RnfABCDGE type E subunit</i> |           |            |                        |                      |            |                              |   |         |           |            |                        |                      |           |     |
| PG0306  |        | 6.07 E-3                                                   | 47.9      | 22         | 1.1230                 | 6.1276               | R          | ●                            | ● | R       | 5.99 E-12 | 6.07 E+7   | 1.51 E+7               | 2.0103               | 26.1750   | R ● |
| PGN1656 | PG0279 | <i>electron transport complex RnfABCDGE type G subunit</i> |           |            |                        |                      |            |                              |   |         |           |            |                        |                      |           |     |
| PG0305  |        | 1.42 E-1                                                   | 6.8       | 15         | -1.1318                | 4.4492               | Y          | ●                            | ● | Y       | 1.37 E-3  | 3.17 E+6   | 7.51 E+6               | -1.2436              | 23.3486   | Y ● |
| PGN1657 | PG0278 | <i>electron transport complex RnfABCDGE type D subunit</i> |           |            |                        |                      |            |                              |   |         |           |            |                        |                      |           |     |
| PG0304  |        | 6.69 E-1                                                   | 50.5      | 49         | 0.0430                 | 6.6364               | Y          | ●                            | ● | Y       | 3.2 E-2   | 3.62 E+7   | 2.98 E+7               | 0.2835               | 25.9755   | Y ● |
| PGN1658 | PG0277 | <i>electron transport complex RnfABCDGE type C subunit</i> |           |            |                        |                      |            |                              |   |         |           |            |                        |                      |           |     |
| PG0303  |        | 1.37 E-1                                                   | 30.8      | 46.5       | -0.5941                | 6.2725               | Y          | ●                            | ● | Y       | 6.66 E-2  | 9.27 E+6   | 1.06 E+7               | -0.1932              | 24.2438   | Y ● |
| PGN1659 | PG0276 | <i>electron transport complex RnfABCDGE type B subunit</i> |           |            |                        |                      |            |                              |   |         |           |            |                        |                      |           |     |
| PG0302  |        | 2.15 E-1                                                   | 4.3       | 1          | 2.0970                 | 2.4001               | Y          | ●                            | ● | R       | 3.82 E-8  | 1.04 E+6   | 1 E+3                  | 10.0267              | 19.9939   | R ● |
| PGN1660 | PG0275 | <i>hypothetical protein PG_0302</i>                        |           |            |                        |                      |            |                              |   |         |           |            |                        |                      |           |     |
| PG0300  |        | 4.23 E-1                                                   | 2.6       | 1          | 1.3601                 | 1.8347               | Y          | ●                            | ● | R       | 0         | 1.55 E+6   | 1 E+3                  | 10.6017              | 20.5684   | R ● |
| PGN1661 | PG0274 | <i>TPR domain protein</i>                                  |           |            |                        |                      |            |                              |   |         |           |            |                        |                      |           |     |
| PG0296  |        | 7 E-1                                                      | 138.6     | 139        | -0.0040                | 8.1169               | Y          | ●                            | ● | Y       | 1.21 E-1  | 9.8 E+7    | 9.24 E+7               | 0.0852               | 27.5048   | Y ● |
| PGN1666 | PG0272 | <i>phosphoribosylformylglycinamide synthase putative</i>   |           |            |                        |                      |            |                              |   |         |           |            |                        |                      |           |     |
| PG0295  |        | 4.75 E-1                                                   | 3.4       | 5.5        | -0.6843                | 3.1575               | Y          | ●                            | ● | Y       | 2.16 E-2  | 1.74 E+6   | 1.13 E+6               | 0.6244               | 21.4495   | Y ● |
| PGN1667 | PG0271 | <i>dprA DNA processing protein DprA putative</i>           |           |            |                        |                      |            |                              |   |         |           |            |                        |                      |           |     |
| PG0294  |        | 6.69 E-1                                                   | 1.7       | 2          | -0.2249                | 1.8919               | Y          | ●                            | ● | Y       | 1.54 E-2  | 1.85 E+3   | 4.27 E+5               | -7.8513              | 18.7112   | Y ● |
| PGN1668 | PG0270 | <i>glycosyl transferase group 2 family protein</i>         |           |            |                        |                      |            |                              |   |         |           |            |                        |                      |           |     |
| PG0293  |        | 0                                                          | 247.3     | 72.5       | 1.7701                 | 8.3210               | R          | ●                            | ● | R       | 0         | 2.68 E+8   | 7.93 E+7               | 1.7574               | 28.3719   | R ● |
| PGN1670 | PG0269 | <i>secretion activator protein putative</i>                |           |            |                        |                      |            |                              |   |         |           |            |                        |                      |           |     |
| PG0291  |        | 2.99 E-1                                                   | 6.0       | 11         | -0.8770                | 4.0866               | Y          | ●                            | ● | Y       | 1.29 E-2  | 3.15 E+6   | 6.4 E+6                | -1.0233              | 23.1868   | Y ● |
| PGN1673 | PG0266 | <i>hypothetical protein PG_0291</i>                        |           |            |                        |                      |            |                              |   |         |           |            |                        |                      |           |     |



| TIGR    |        | PP PPC / Pg Spectral Count                         |           |            |                        |                      |            | PP PPC/ Pg Protein Intensity |  |         |           |            |                        | 33277                |           |   |
|---------|--------|----------------------------------------------------|-----------|------------|------------------------|----------------------|------------|------------------------------|--|---------|-----------|------------|------------------------|----------------------|-----------|---|
| PGN     | LANL   | q-value                                            | PP (Norm) | PPC (Norm) | log <sub>2</sub> Ratio | log <sub>2</sub> Sum | Regulation |                              |  | q-value | PP (Norm) | PPC (Norm) | log <sub>2</sub> Ratio | log <sub>2</sub> Sum | Consensus |   |
| PG0290  |        | 3.55 E-2                                           | 25.7      | 11         | 1.2226                 | 5.1965               | Y          |                              |  | Y       | 5.41 E-2  | 1.34 E+7   | 1.05 E+7               | 0.3460               | 24.5100   | Y |
| PGN1674 | PG0265 | <i>hypothetical protein PG_0290</i>                |           |            |                        |                      |            |                              |  |         |           |            |                        |                      |           |   |
| PG0289  |        | 1.47 E-2                                           | 36.8      | 16.5       | 1.1570                 | 5.7359               | Y          |                              |  | R       | 9.86 E-10 | 3.29 E+7   | 9.4 E+6                | 1.8084               | 25.3344   | R |
| PGN1675 | PG0264 | <i>hypothetical protein PG_0289</i>                |           |            |                        |                      |            |                              |  |         |           |            |                        |                      |           |   |
| PG0288  |        | 2.82 E-1                                           | 20.5      | 29.5       | -0.5226                | 5.6449               | Y          |                              |  | Y       | 7.1 E-2   | 1.42 E+7   | 1.7 E+7                | -0.2593              | 24.8989   | Y |
| PGN1676 | PG0263 | <i>lipoprotein putative</i>                        |           |            |                        |                      |            |                              |  |         |           |            |                        |                      |           |   |
| PG0287  |        | 1.55 E-3                                           | 1.7       | 15.5       | -3.1791                | 4.1053               | G          |                              |  | G       | 1.9 E-5   | 1.85 E+3   | 3.65 E+6               | -10.9460             | 21.8004   | G |
| PGN1677 | PG0262 | <i>hypothetical protein PG_0287</i>                |           |            |                        |                      |            |                              |  |         |           |            |                        |                      |           |   |
| PG0286  |        | 4.53 E-1                                           | 9.4       | 13         | -0.4659                | 4.4862               | Y          |                              |  | G       | 2.34 E-4  | 6.5 E+6    | 2.07 E+7               | -1.6701              | 24.6974   | G |
| PGN1678 | PG0260 | <i>hypothetical protein PG_0286</i>                |           |            |                        |                      |            |                              |  |         |           |            |                        |                      |           |   |
| PG0279  |        | 1.24 E-1                                           | 80.4      | 105.5      | -0.3914                | 7.5386               | Y          |                              |  | Y       | 1.4 E-3   | 4.3 E+7    | 6.48 E+7               | -0.5909              | 26.6839   | Y |
| PGN1685 | PG0251 | <i>maeB NADP-dependent malic enzyme</i>            |           |            |                        |                      |            |                              |  |         |           |            |                        |                      |           |   |
| PG0278  |        | 6.69 E-1                                           | 1.7       | 1.5        | 0.1901                 | 1.6832               | Y          |                              |  | G       | 0         | 1.85 E+3   | 6.13 E+5               | -8.3706              | 19.2287   | Y |
| PGN1687 | PG0250 | <i>hypothetical protein PG_0278</i>                |           |            |                        |                      |            |                              |  |         |           |            |                        |                      |           |   |
| PG1747  |        | 1.21 E-1                                           | 4.3       | 11.5       | -1.4265                | 3.9799               | Y          |                              |  | Y       | 1.39 E-1  | 4.16 E+6   | 4.56 E+6               | -0.1346              | 23.0557   | Y |
| PGN1688 | PG1523 | <i>ribose 5-phosphate isomerase B putative</i>     |           |            |                        |                      |            |                              |  |         |           |            |                        |                      |           |   |
| PG1748  |        | 2.21 E-3                                           | 150.6     | 96.5       | 0.6421                 | 7.9489               | R          |                              |  | R       | 2.85 E-5  | 1.33 E+8   | 8.38 E+7               | 0.6637               | 27.6909   | R |
| PGN1689 | PG1524 | <i>tkt transketolase</i>                           |           |            |                        |                      |            |                              |  |         |           |            |                        |                      |           |   |
| PG1750  |        | 1.84 E-1                                           | 1.7       | 6          | -1.8099                | 2.9470               | Y          |                              |  | G       | 2.58 E-16 | 1.85 E+3   | 7.03 E+5               | -8.5685              | 19.4260   | G |
| PGN1690 | PG1525 | <i>alpha-13/4-fucosidase putative</i>              |           |            |                        |                      |            |                              |  |         |           |            |                        |                      |           |   |
| PG1751  |        | 4.4 E-1                                            | 1.7       | 3.5        | -1.0323                | 2.3816               | Y          |                              |  | Y       | 1.07 E-2  | 1.85 E+3   | 1.19 E+6               | -9.3325              | 20.1885   | Y |
| PGN1691 | PG1526 | <i>aminotransferase class V</i>                    |           |            |                        |                      |            |                              |  |         |           |            |                        |                      |           |   |
| PG1753  |        | 6.97 E-1                                           | 2.6       | 2.5        | 0.0381                 | 2.3411               | Y          |                              |  | R       | 0         | 8.4 E+5    | 4.51 E+5               | 0.8957               | 20.2998   | R |
| PGN1693 | PG1527 | <i>selD selenide water dikinase</i>                |           |            |                        |                      |            |                              |  |         |           |            |                        |                      |           |   |
| PG1754  |        | 6.14 E-1                                           | 43.6      | 47         | -0.1071                | 6.5020               | Y          |                              |  | Y       | 8.83 E-2  | 2.17 E+7   | 2.45 E+7               | -0.1754              | 25.4585   | Y |
| PGN1694 | PG1528 | <i>conserved domain protein</i>                    |           |            |                        |                      |            |                              |  |         |           |            |                        |                      |           |   |
| PG1755  |        | 1.97 E-4                                           | 298.6     | 206        | 0.5357                 | 8.9791               | R          |                              |  | Y       | 4.09 E-3  | 5.15 E+8   | 3.93 E+8               | 0.3911               | 29.7569   | R |
| PGN1695 | PG1529 | <i>fbaB fructose-bisphosphate aldolase class I</i> |           |            |                        |                      |            |                              |  |         |           |            |                        |                      |           |   |
| PG1757  |        | 5.88 E-10                                          | 18.0      | 81         | -2.1724                | 6.6289               | G          |                              |  | G       | 5.03 E-5  | 1.05 E+7   | 6.37 E+7               | -2.5968              | 26.1444   | G |
| PGN1697 | PG1530 | <i>hypothetical protein PG_1757</i>                |           |            |                        |                      |            |                              |  |         |           |            |                        |                      |           |   |
| PG1758  |        | 2.8 E-1                                            | 43.6      | 32.5       | 0.4252                 | 6.2506               | Y          |                              |  | Y       | 1.84 E-1  | 6.29 E+7   | 6.1 E+7                | 0.0442               | 26.8842   | Y |
| PGN1698 | PG1531 | <i>rpsO ribosomal protein S15</i>                  |           |            |                        |                      |            |                              |  |         |           |            |                        |                      |           |   |
| PG1759  |        | 3.05 E-1                                           | 6.8       | 12         | -0.8099                | 4.2361               | Y          |                              |  | Y       | 2.67 E-2  | 2.78 E+6   | 5.16 E+6               | -0.8929              | 22.9205   | Y |
| PGN1699 | PG1532 | <i>adhesion protein putative</i>                   |           |            |                        |                      |            |                              |  |         |           |            |                        |                      |           |   |



| TIGR    |        | PP PPC / Pg Spectral Count                                                             |           |            |                        |                      |            | PP PPC/ Pg Protein Intensity |  |         |           |            |                        | 33277                |           |   |
|---------|--------|----------------------------------------------------------------------------------------|-----------|------------|------------------------|----------------------|------------|------------------------------|--|---------|-----------|------------|------------------------|----------------------|-----------|---|
| PGN     | LANL   | q-value                                                                                | PP (Norm) | PPC (Norm) | log <sub>2</sub> Ratio | log <sub>2</sub> Sum | Regulation |                              |  | q-value | PP (Norm) | PPC (Norm) | log <sub>2</sub> Ratio | log <sub>2</sub> Sum | Consensus |   |
| PG1760  |        | 4.23 E-1                                                                               | 2.6       | 1          | 1.3601                 | 1.8347               | Y          |                              |  | R       | 0         | 1.09 E+6   | 1 E+3                  | 10.0844              | 20.0515   | R |
| PGN1700 | PG1533 | <i>ABC transporter ATP-binding protein</i>                                             |           |            |                        |                      |            |                              |  |         |           |            |                        |                      |           |   |
| PG1762  |        | 0                                                                                      | 288.4     | 87.5       | 1.7205                 | 8.5540               | R          |                              |  | R       | 0         | 2.17 E+8   | 9.17 E+7               | 1.2400               | 28.1992   | R |
| PGN1702 | PG1536 | <i>secDF protein-export membrane protein SecD/protein-export membrane protein SecF</i> |           |            |                        |                      |            |                              |  |         |           |            |                        |                      |           |   |
| PG1763  |        | 9.44 E-2                                                                               | 6.0       | 1          | 2.5825                 | 2.8052               | Y          |                              |  | R       | 1.74 E-15 | 1.7 E+6    | 1 E+3                  | 10.7321              | 20.6987   | R |
| PGN1703 | PG1537 | <i>rnc ribonuclease III</i>                                                            |           |            |                        |                      |            |                              |  |         |           |            |                        |                      |           |   |
| PG1764  |        | 9.32 E-3                                                                               | 288.4     | 221        | 0.3838                 | 8.9925               | R          |                              |  | Y       | 1.68 E-2  | 1.22 E+8   | 1.55 E+8               | -0.3461              | 28.0478   | Y |
| PGN1704 | PG1538 | <i>fabF 3-oxoacyl-(acyl-carrier-protein) synthase II</i>                               |           |            |                        |                      |            |                              |  |         |           |            |                        |                      |           |   |
| PG1765  |        | 0                                                                                      | 476.6     | 149.5      | 1.6726                 | 9.2902               | R          |                              |  | Y       | 1.74 E-1  | 4.62 E+8   | 4.8 E+8                | -0.0553              | 29.8123   | Y |
| PGN1705 |        | <i>acpP acyl carrier protein</i>                                                       |           |            |                        |                      |            |                              |  |         |           |            |                        |                      |           |   |
| PG1766  |        | 6.69 E-1                                                                               | 10.3      | 9.5        | 0.1121                 | 4.3051               | Y          |                              |  | Y       | 8.63 E-2  | 1.56 E+6   | 2.12 E+6               | -0.4482              | 21.8113   | Y |
| PGN1706 | PG1539 | <i>purN phosphoribosylglycinamide formyltransferase</i>                                |           |            |                        |                      |            |                              |  |         |           |            |                        |                      |           |   |
| PG1767  |        | 1.53 E-1                                                                               | 2.6       | 8          | -1.6399                | 3.4015               | Y          |                              |  | Y       | 8.54 E-2  | 1.47 E+6   | 3.02 E+6               | -1.0390              | 22.0988   | Y |
| PGN1707 | PG1540 | <i>lipoprotein putative</i>                                                            |           |            |                        |                      |            |                              |  |         |           |            |                        |                      |           |   |
| PG1768  |        | 4.23 E-1                                                                               | 2.6       | 1          | 1.3601                 | 1.8347               | Y          |                              |  | R       | 0         | 8.3 E+5    | 1 E+3                  | 9.6970               | 19.6645   | R |
| PGN1708 | PG1541 | <i>magnesium chelatase subunit D/I family</i>                                          |           |            |                        |                      |            |                              |  |         |           |            |                        |                      |           |   |
| PG1771  |        | 1.72 E-2                                                                               | 50.5      | 26.5       | 0.9298                 | 6.2665               | Y          |                              |  | Y       | 3.72 E-2  | 1.48 E+7   | 1.18 E+7               | 0.3324               | 24.6665   | Y |
| PGN1711 | PG1545 | <i>pheS phenylalanyl-tRNA synthetase alpha subunit</i>                                 |           |            |                        |                      |            |                              |  |         |           |            |                        |                      |           |   |
| PG1772  |        | 3.05 E-1                                                                               | 5.1       | 2          | 1.3601                 | 2.8347               | Y          |                              |  | R       | 0         | 4.01 E+5   | 6 E+4                  | 2.7409               | 18.8146   | R |
| PGN1712 | PG1547 | <i>nth endonuclease III</i>                                                            |           |            |                        |                      |            |                              |  |         |           |            |                        |                      |           |   |
| PG1774  |        | 4.23 E-1                                                                               | 6.8       | 4          | 0.7751                 | 3.4390               | Y          |                              |  | R       | 2.64 E-5  | 3.53 E+6   | 8.19 E+5               | 2.1082               | 22.0530   | R |
| PGN1714 | PG1549 | <i>mfd transcription-repair coupling factor</i>                                        |           |            |                        |                      |            |                              |  |         |           |            |                        |                      |           |   |
| PG1775  |        | 3.31 E-1                                                                               | 26.5      | 19         | 0.4814                 | 5.5086               | Y          |                              |  | Y       | 1.08 E-1  | 1.59 E+7   | 1.77 E+7               | -0.1566              | 25.0039   | Y |
| PGN1715 | PG1550 | <i>grpE grpE protein</i>                                                               |           |            |                        |                      |            |                              |  |         |           |            |                        |                      |           |   |
| PG1776  |        | 4.75 E-1                                                                               | 18.0      | 14         | 0.3601                 | 4.9986               | Y          |                              |  | Y       | 6.14 E-2  | 2.97 E+6   | 5.53 E+6               | -0.8945              | 23.0197   | Y |
| PGN1716 | PG1552 | <i>dnaJ dnaJ protein</i>                                                               |           |            |                        |                      |            |                              |  |         |           |            |                        |                      |           |   |
| PG1777  |        | 6.69 E-1                                                                               | 1.7       | 2          | -0.2249                | 1.8919               | Y          |                              |  | G       | 0         | 1.85 E+3   | 1.44 E+6               | -9.6029              | 20.4585   | G |
| PGN1717 | PG1553 | <i>conserved hypothetical protein</i>                                                  |           |            |                        |                      |            |                              |  |         |           |            |                        |                      |           |   |
| PG1778  |        | 2.67 E-1                                                                               | 2.6       | 6.5        | -1.3404                | 3.1806               | Y          |                              |  | Y       | 2.95 E-2  | 7.96 E+5   | 1.32 E+6               | -0.7310              | 21.0145   | Y |
| PGN1718 | PG1554 | <i>conserved hypothetical protein</i>                                                  |           |            |                        |                      |            |                              |  |         |           |            |                        |                      |           |   |
| PG1779  |        | 6 E-1                                                                                  | 14.5      | 12.5       | 0.2187                 | 4.7573               | Y          |                              |  | Y       | 1.73 E-1  | 7.5 E+6    | 8.16 E+6               | -0.1213              | 23.9006   | Y |
| PGN1719 | PG1555 | <i>conserved hypothetical protein</i>                                                  |           |            |                        |                      |            |                              |  |         |           |            |                        |                      |           |   |
| PG1780  |        | 6 E-1                                                                                  | 35.1      | 38.5       | -0.1341                | 6.2013               | Y          |                              |  | Y       | 9.99 E-3  | 1.25 E+7   | 9.06 E+6               | 0.4639               | 24.3621   | Y |
| PGN1721 | PG1556 | <i>bioF-3 8-amino-7-oxononanoate synthase</i>                                          |           |            |                        |                      |            |                              |  |         |           |            |                        |                      |           |   |

| TIGR    |        | PP PPC / Pg Spectral Count                                        |           |            |                        |                      |            | PP PPC/ Pg Protein Intensity |  |         |           |            |                        | 33277                |           |   |
|---------|--------|-------------------------------------------------------------------|-----------|------------|------------------------|----------------------|------------|------------------------------|--|---------|-----------|------------|------------------------|----------------------|-----------|---|
| PGN     | LANL   | q-value                                                           | PP (Norm) | PPC (Norm) | log <sub>2</sub> Ratio | log <sub>2</sub> Sum | Regulation |                              |  | q-value | PP (Norm) | PPC (Norm) | log <sub>2</sub> Ratio | log <sub>2</sub> Sum | Consensus |   |
| PG1781  |        | 9.98 E-4                                                          | 29.1      | 7.5        | 1.9557                 | 5.1935               | R          |                              |  | R       | 7.95 E-12 | 1.14 E+7   | 2.76 E+6               | 2.0504               | 23.7574   | R |
| PGN1722 | PG1557 | <i>udk uridine kinase</i>                                         |           |            |                        |                      |            |                              |  |         |           |            |                        |                      |           |   |
| PG1782  |        | 6 E-1                                                             | 1.7       | 2.5        | -0.5468                | 2.0743               | Y          |                              |  | G       | 7.18 E-9  | 1.85 E+3   | 3.56 E+5               | -7.5890              | 18.4502   | G |
| PGN1723 | PG1558 | <i>hypothetical protein PG_1782</i>                               |           |            |                        |                      |            |                              |  |         |           |            |                        |                      |           |   |
| PG1783  |        | 6.69 E-1                                                          | 1.7       | 2          | -0.2249                | 1.8919               | Y          |                              |  | G       | 1.77 E-6  | 1.85 E+3   | 1.56 E+5               | -6.3995              | 17.2702   | G |
| PGN1724 | PG1559 | <i>glycosyl transferase group 2 family protein</i>                |           |            |                        |                      |            |                              |  |         |           |            |                        |                      |           |   |
|         |        | 0                                                                 | 1853.3    | 3174       | -0.7762                | 12.2956              | G          |                              |  | Y       | 1.25 E-2  | 2.18 E+9   | 2.63 E+9               | -0.2724              | 32.1611   | G |
| PGN1728 |        |                                                                   |           |            |                        |                      |            |                              |  |         |           |            |                        |                      |           |   |
| PG1842  |        | 6.69 E-1                                                          | 1.7       | 1.5        | 0.1901                 | 1.6832               | Y          |                              |  | G       | 0         | 1.85 E+3   | 2.57 E+5               | -7.1198              | 17.9838   | Y |
| PGN1729 | PG1604 | <i>acetyltransferase GNAT family</i>                              |           |            |                        |                      |            |                              |  |         |           |            |                        |                      |           |   |
| PG1841  |        | 3.21 E-1                                                          | 1.7       | 4.5        | -1.3948                | 2.6349               | Y          |                              |  | G       | 7.61 E-16 | 1.85 E+3   | 6.95 E+5               | -8.5525              | 19.4100   | G |
| PGN1730 | PG1603 | <i>conserved hypothetical protein</i>                             |           |            |                        |                      |            |                              |  |         |           |            |                        |                      |           |   |
| PG1837  |        | 2.09 E-2                                                          | 77.9      | 48         | 0.6979                 | 6.9757               | Y          |                              |  | Y       | 3.34 E-3  | 1.04 E+8   | 6.39 E+7               | 0.7084               | 27.3255   | Y |
| PGN1733 | PG1602 | <i>hemagglutinin protein HagA</i>                                 |           |            |                        |                      |            |                              |  |         |           |            |                        |                      |           |   |
| PG1835  |        | 4.76 E-1                                                          | 30.8      | 36.5       | -0.2448                | 6.0726               | Y          |                              |  | Y       | 5.08 E-3  | 2.04 E+7   | 3.37 E+7               | -0.7238              | 25.6890   | Y |
| PGN1735 | PG1600 | <i>lipoprotein putative</i>                                       |           |            |                        |                      |            |                              |  |         |           |            |                        |                      |           |   |
| PG1834  |        | 4.21 E-1                                                          | 29.9      | 23.5       | 0.3498                 | 5.7401               | Y          |                              |  | Y       | 6.16 E-2  | 1.45 E+7   | 1.2 E+7                | 0.2748               | 24.6555   | Y |
| PGN1736 | PG1598 | <i>glycogen synthase-related protein</i>                          |           |            |                        |                      |            |                              |  |         |           |            |                        |                      |           |   |
| PG1831  |        | 6.69 E-1                                                          | 1.7       | 1.5        | 0.1901                 | 1.6832               | Y          |                              |  | G       | 0         | 1.85 E+3   | 9.39 E+5               | -8.9877              | 19.8443   | Y |
| PGN1737 | PG1597 | <i>recQ-2 ATP-dependent DNA helicase RecQ</i>                     |           |            |                        |                      |            |                              |  |         |           |            |                        |                      |           |   |
| PG1829  |        | 2.32 E-1                                                          | 8.6       | 15.5       | -0.8572                | 4.5884               | Y          |                              |  | G       | 2.72 E-4  | 1.26 E+6   | 5.01 E+6               | -1.9951              | 22.5787   | G |
| PGN1738 | PG1596 | <i>long-chain-fatty-acid--CoA ligase putative</i>                 |           |            |                        |                      |            |                              |  |         |           |            |                        |                      |           |   |
| PG1824  |        | 1.69 E-6                                                          | 463.8     | 635.5      | -0.4545                | 10.1023              | G          |                              |  | G       | 1.36 E-5  | 2.91 E+8   | 4.26 E+8               | -0.5510              | 29.4182   | G |
| PGN1743 | PG1593 | <i>eno enolase</i>                                                |           |            |                        |                      |            |                              |  |         |           |            |                        |                      |           |   |
| PG1823  |        | 5.13 E-5                                                          | 1.7       | 21.5       | -3.6512                | 4.5368               | G          |                              |  | G       | 5.96 E-5  | 1.85 E+3   | 1.06 E+7               | -12.4779             | 23.3318   | G |
| PGN1744 | PG1592 | <i>hypothetical protein PG_1823</i>                               |           |            |                        |                      |            |                              |  |         |           |            |                        |                      |           |   |
| PG1820  |        | 6.69 E-1                                                          | 1.7       | 2          | -0.2249                | 1.8919               | Y          |                              |  | G       | 2.69 E-9  | 1.85 E+3   | 2.24 E+6               | -10.2441             | 21.0990   | G |
| PGN1746 | PG1591 | <i>nrfA cytochrome c nitrite reductase catalytic subunit NrfA</i> |           |            |                        |                      |            |                              |  |         |           |            |                        |                      |           |   |
| PG1816  |        | 1.07 E-2                                                          | 103.5     | 65.5       | 0.6605                 | 7.4012               | Y          |                              |  | Y       | 1.74 E-1  | 4.47 E+7   | 4.31 E+7               | 0.0518               | 26.3878   | Y |
| PGN1749 | PG1587 | <i>NAD(P)H dehydrogenase quinone family putative</i>              |           |            |                        |                      |            |                              |  |         |           |            |                        |                      |           |   |
| PG1815  |        | 6.52 E-2                                                          | 6.0       | 16         | -1.4175                | 4.4587               | Y          |                              |  | G       | 1.55 E-5  | 8.89 E+5   | 4.94 E+6               | -2.4733              | 22.4738   | G |
| PGN1750 | PG1586 | <i>kdsB 3-deoxy-D-manno-octulosonate cytidyltransferase</i>       |           |            |                        |                      |            |                              |  |         |           |            |                        |                      |           |   |
| PG1814  |        | 1.86 E-1                                                          | 6.8       | 14         | -1.0323                | 4.3816               | Y          |                              |  | Y       | 1.88 E-1  | 2.49 E+6   | 2.54 E+6               | -0.0270              | 22.2619   | Y |
| PGN1751 | PG1585 | <i>dnaG DNA primase</i>                                           |           |            |                        |                      |            |                              |  |         |           |            |                        |                      |           |   |

| TIGR    |        | PP PPC / Pg Spectral Count                                          |           |            |                        |                      |            | PP PPC/ Pg Protein Intensity |  |         |           |            |                        | 33277                |           |   |
|---------|--------|---------------------------------------------------------------------|-----------|------------|------------------------|----------------------|------------|------------------------------|--|---------|-----------|------------|------------------------|----------------------|-----------|---|
| PGN     | LANL   | q-value                                                             | PP (Norm) | PPC (Norm) | log <sub>2</sub> Ratio | log <sub>2</sub> Sum | Regulation |                              |  | q-value | PP (Norm) | PPC (Norm) | log <sub>2</sub> Ratio | log <sub>2</sub> Sum | Consensus |   |
| PG1813  |        | 1.84 E-1                                                            | 2.6       | 7.5        | -1.5468                | 3.3316               | Y          |                              |  | Y       | 3.72 E-2  | 2.92 E+6   | 5.2 E+6                | -0.8333              | 22.9524   | Y |
| PGN1752 |        | <i>ferredoxin 4Fe-4S</i>                                            |           |            |                        |                      |            |                              |  |         |           |            |                        |                      |           |   |
| PG1812  |        | 0                                                                   | 651.2     | 321.5      | 1.0182                 | 9.9258               | R          |                              |  | R       | 0         | 4.33 E+8   | 1.88 E+8               | 1.1999               | 29.2111   | R |
| PGN1753 | PG1583 | <i>2-oxoglutarate oxidoreductase alpha subunit</i>                  |           |            |                        |                      |            |                              |  |         |           |            |                        |                      |           |   |
| PG1810  |        | 2.35 E-7                                                            | 155.7     | 72.5       | 1.1030                 | 7.8343               | R          |                              |  | R       | 4.17 E-10 | 1.19 E+8   | 4.89 E+7               | 1.2811               | 27.3205   | R |
| PGN1755 | PG1582 | <i>2-oxoglutarate oxidoreductase beta subunit</i>                   |           |            |                        |                      |            |                              |  |         |           |            |                        |                      |           |   |
| PG1809  |        | 4.35 E-12                                                           | 116.4     | 30.5       | 1.9318                 | 7.1984               | R          |                              |  | R       | 0         | 1.35 E+8   | 2.8 E+7                | 2.2716               | 27.2798   | R |
| PGN1756 | PG1581 | <i>2-oxoglutarate oxidoreductase gamma subunit</i>                  |           |            |                        |                      |            |                              |  |         |           |            |                        |                      |           |   |
| PG1808  |        | 4.75 E-1                                                            | 23.1      | 18.5       | 0.3205                 | 5.3786               | Y          |                              |  | Y       | 2.01 E-1  | 7.87 E+6   | 7.85 E+6               | 0.0028               | 23.9057   | Y |
| PGN1757 | PG1580 | <i>spoT guanosine-3'5'-bis(diphosphate) 3'-pyrophosphohydrolase</i> |           |            |                        |                      |            |                              |  |         |           |            |                        |                      |           |   |
| PG1806  |        | 6.34 E-3                                                            | 29.1      | 10         | 1.5406                 | 5.2888               | R          |                              |  | R       | 3.54 E-4  | 1.68 E+7   | 7.04 E+6               | 1.2539               | 24.5072   | R |
| PGN1759 | PG1578 | <i>atpI v-type ATPase subunit I</i>                                 |           |            |                        |                      |            |                              |  |         |           |            |                        |                      |           |   |
| PG1805  |        | 2.62 E-1                                                            | 18.8      | 28         | -0.5728                | 5.5492               | Y          |                              |  | Y       | 1.45 E-1  | 8.02 E+6   | 8.65 E+6               | -0.1089              | 23.9901   | Y |
| PGN1760 | PG1577 | <i>atpD v-type ATPase subunit D</i>                                 |           |            |                        |                      |            |                              |  |         |           |            |                        |                      |           |   |
| PG1804  |        | 5.28 E-6                                                            | 246.4     | 369        | -0.5825                | 9.2654               | G          |                              |  | Y       | 1.78 E-1  | 1.42 E+8   | 1.38 E+8               | 0.0350               | 28.0599   | Y |
| PGN1761 | PG1576 | <i>atpB v-type ATPase subunit B</i>                                 |           |            |                        |                      |            |                              |  |         |           |            |                        |                      |           |   |
| PG1803  |        | 5.89 E-1                                                            | 159.2     | 151.5      | 0.0711                 | 8.2792               | Y          |                              |  | Y       | 7.53 E-2  | 1.15 E+8   | 1.29 E+8               | -0.1625              | 27.8589   | Y |
| PGN1762 | PG1575 | <i>atpA v-type ATPase subunit A</i>                                 |           |            |                        |                      |            |                              |  |         |           |            |                        |                      |           |   |
| PG1802  |        | 7.01 E-1                                                            | 52.2      | 52         | 0.0054                 | 6.7031               | Y          |                              |  | Y       | 1.32 E-2  | 2.15 E+7   | 1.71 E+7               | 0.3277               | 25.2027   | Y |
| PGN1763 | PG1574 | <i>hypothetical protein PG_1802</i>                                 |           |            |                        |                      |            |                              |  |         |           |            |                        |                      |           |   |
| PG1801  |        | 5.11 E-6                                                            | 58.2      | 16.5       | 1.8182                 | 6.2227               | R          |                              |  | R       | 0         | 4.85 E+7   | 6.74 E+6               | 2.8455               | 25.7181   | R |
| PGN1764 | PG1573 | <i>v-type ATPase subunit E putative</i>                             |           |            |                        |                      |            |                              |  |         |           |            |                        |                      |           |   |
| PG1798  |        | 1.15 E-2                                                            | 35.9      | 65         | -0.8550                | 6.6573               | Y          |                              |  | Y       | 8.87 E-3  | 1.49 E+7   | 2.21 E+7               | -0.5742              | 25.1420   | Y |
| PGN1767 | PG1572 | <i>immunoreactive 46 kDa antigen PG99</i>                           |           |            |                        |                      |            |                              |  |         |           |            |                        |                      |           |   |
| PG1797  |        | 6.05 E-2                                                            | 16.3      | 6          | 1.4381                 | 4.4762               | Y          |                              |  | R       | 4.42 E-7  | 7.99 E+6   | 3.03 E+6               | 1.4007               | 23.3931   | R |
| PGN1768 | PG1571 | <i>DNA-binding response regulator/sensor histidine kinase</i>       |           |            |                        |                      |            |                              |  |         |           |            |                        |                      |           |   |
| PG1794  |        | 3.82 E-1                                                            | 1.7       | 4          | -1.2249                | 2.5138               | Y          |                              |  | G       | 2.88 E-6  | 1.85 E+3   | 1.94 E+6               | -10.0368             | 20.8919   | G |
| PGN1771 | PG1569 | <i>polA DNA polymerase type I</i>                                   |           |            |                        |                      |            |                              |  |         |           |            |                        |                      |           |   |
| PG1793  |        | 6.69 E-1                                                            | 10.3      | 11         | -0.0994                | 4.4106               | Y          |                              |  | Y       | 3.49 E-3  | 4.2 E+6    | 2.26 E+6               | 0.8921               | 22.6223   | Y |
| PGN1772 | PG1568 | <i>glgB 14-alpha-glucan branching enzyme</i>                        |           |            |                        |                      |            |                              |  |         |           |            |                        |                      |           |   |
| PG1792  |        | 4.23 E-1                                                            | 2.6       | 1          | 1.3601                 | 1.8347               | Y          |                              |  | R       | 0         | 1.63 E+5   | 1 E+3                  | 7.3492               | 17.3238   | R |
| PGN1773 | PG1567 | <i>sodium/hydrogen antiporter</i>                                   |           |            |                        |                      |            |                              |  |         |           |            |                        |                      |           |   |
| PG1790  |        | 1.5 E-1                                                             | 1.7       | 6.5        | -1.9253                | 3.0376               | Y          |                              |  | G       | 6.92 E-6  | 1.85 E+3   | 1.12 E+6               | -9.2375              | 20.0936   | G |
| PGN1775 | PG1566 | <i>hypothetical protein PG_1790</i>                                 |           |            |                        |                      |            |                              |  |         |           |            |                        |                      |           |   |

| TIGR    |        | PP PPC / Pg Spectral Count                                                                 |           |            |                        |                      |            | PP PPC/ Pg Protein Intensity |  |         |           |            |                        | 33277                |           |   |
|---------|--------|--------------------------------------------------------------------------------------------|-----------|------------|------------------------|----------------------|------------|------------------------------|--|---------|-----------|------------|------------------------|----------------------|-----------|---|
| PGN     | LANL   | q-value                                                                                    | PP (Norm) | PPC (Norm) | log <sub>2</sub> Ratio | log <sub>2</sub> Sum | Regulation |                              |  | q-value | PP (Norm) | PPC (Norm) | log <sub>2</sub> Ratio | log <sub>2</sub> Sum | Consensus |   |
| PG1789  |        | 2.8 E-2                                                                                    | 21.4      | 41.5       | -0.9561                | 5.9748               | Y          |                              |  | Y       | 1.12 E-3  | 1.08 E+7   | 2.08 E+7               | -0.9478              | 24.9126   | Y |
| PGN1776 | PG1565 | <i>dcp-2 peptidyl-dipeptidase Dcp</i>                                                      |           |            |                        |                      |            |                              |  |         |           |            |                        |                      |           |   |
| PG1788  |        | 6.11 E-3                                                                                   | 283.2     | 213.5      | 0.4077                 | 8.9563               | R          |                              |  | Y       | 2.02 E-1  | 2.81 E+8   | 2.81 E+8               | 0.0006               | 29.0672   | R |
| PGN1777 | PG1564 | <i>cysteine peptidase putative</i>                                                         |           |            |                        |                      |            |                              |  |         |           |            |                        |                      |           |   |
| PG1847  |        | 8.08 E-7                                                                                   | 24.8      | 77.5       | -1.6430                | 6.6769               | G          |                              |  | G       | 1.82 E-5  | 1.17 E+7   | 2.51 E+7               | -1.1049              | 25.1325   | G |
| PGN1780 | PG1609 | <i>endoribonuclease L-PSP putative</i>                                                     |           |            |                        |                      |            |                              |  |         |           |            |                        |                      |           |   |
| PG1848  |        | 3.05 E-1                                                                                   | 5.1       | 2          | 1.3601                 | 2.8347               | Y          |                              |  | R       | 0         | 2.85 E+6   | 1.68 E+5               | 4.0800               | 21.5248   | R |
| PGN1781 | PG1610 | <i>RNA methyltransferase TrmH family</i>                                                   |           |            |                        |                      |            |                              |  |         |           |            |                        |                      |           |   |
| PG1849  |        | 6.69 E-1                                                                                   | 2.6       | 3          | -0.2249                | 2.4769               | Y          |                              |  | Y       | 3.41 E-2  | 1.15 E+6   | 6.07 E+5               | 0.9172               | 20.7418   | Y |
| PGN1782 | PG1611 | <i>recN DNA repair protein RecN</i>                                                        |           |            |                        |                      |            |                              |  |         |           |            |                        |                      |           |   |
| PG1850  |        | 3.52 E-1                                                                                   | 10.3      | 6          | 0.7751                 | 4.0240               | Y          |                              |  | R       | 0         | 3.07 E+6   | 7.52 E+5               | 2.0324               | 21.8674   | R |
| PGN1783 | PG1612 | <i>hypothetical protein PG_1850</i>                                                        |           |            |                        |                      |            |                              |  |         |           |            |                        |                      |           |   |
| PG1851  |        | 3.9 E-1                                                                                    | 9.4       | 14         | -0.5728                | 4.5492               | Y          |                              |  | Y       | 1.3 E-2   | 4.08 E+6   | 8.88 E+6               | -1.1205              | 23.6281   | Y |
| PGN1784 | PG1613 | <i>coaBC phosphopantothencycysteine decarboxylase/phosphopantothenate--cysteine ligase</i> |           |            |                        |                      |            |                              |  |         |           |            |                        |                      |           |   |
| PG1852  |        | 1.38 E-2                                                                                   | 38.5      | 17.5       | 1.1377                 | 5.8075               | Y          |                              |  | Y       | 1.27 E-3  | 1.33 E+7   | 7.12 E+6               | 0.8990               | 24.2820   | Y |
| PGN1785 | PG1614 | <i>exonuclease</i>                                                                         |           |            |                        |                      |            |                              |  |         |           |            |                        |                      |           |   |
| PG1853  |        | 3.23 E-2                                                                                   | 85.6      | 56         | 0.6116                 | 7.1453               | Y          |                              |  | Y       | 1.96 E-1  | 4.13 E+7   | 4.1 E+7                | 0.0111               | 26.2943   | Y |
| PGN1786 | PG1615 | <i>dnaN DNA polymerase III beta subunit</i>                                                |           |            |                        |                      |            |                              |  |         |           |            |                        |                      |           |   |
| PG1854  |        | 6.69 E-1                                                                                   | 1.7       | 1.5        | 0.1901                 | 1.6832               | Y          |                              |  | G       | 0         | 1.85 E+3   | 5.7 E+5                | -8.2658              | 19.1242   | Y |
| PGN1787 | PG1616 | <i>5-formyltetrahydrofolate cyclo-ligase family protein</i>                                |           |            |                        |                      |            |                              |  |         |           |            |                        |                      |           |   |
| PG1855  |        | 2.25 E-1                                                                                   | 5.1       | 1.5        | 1.7751                 | 2.7299               | Y          |                              |  | R       | 0         | 3.86 E+6   | 1.12 E+6               | 1.7911               | 22.2471   | R |
| PGN1788 | PG1617 | <i>carboxyl-terminal protease</i>                                                          |           |            |                        |                      |            |                              |  |         |           |            |                        |                      |           |   |
| PG1858  |        | 6.45 E-2                                                                                   | 37.6      | 59         | -0.6481                | 6.5947               | Y          |                              |  | Y       | 6.64 E-2  | 2.43 E+7   | 3.44 E+7               | -0.4981              | 25.8068   | Y |
| PGN1791 | PG1621 | <i>flavodoxin</i>                                                                          |           |            |                        |                      |            |                              |  |         |           |            |                        |                      |           |   |
| PG1860  |        | 2.15 E-1                                                                                   | 4.3       | 1          | 2.0970                 | 2.4001               | Y          |                              |  | R       | 5.11 E-12 | 8.07 E+5   | 1 E+3                  | 9.6568               | 19.6243   | R |
| PGN1793 | PG1624 | <i>conserved hypothetical protein</i>                                                      |           |            |                        |                      |            |                              |  |         |           |            |                        |                      |           |   |
| PG1862  |        | 6.69 E-1                                                                                   | 3.4       | 3          | 0.1901                 | 2.6832               | Y          |                              |  | Y       | 1.83 E-1  | 9.54 E+5   | 1.03 E+6               | -0.1114              | 20.9201   | Y |
| PGN1795 | PG1625 | <i>hypothetical protein PG_1862</i>                                                        |           |            |                        |                      |            |                              |  |         |           |            |                        |                      |           |   |
| PG1864  |        | 6.94 E-1                                                                                   | 18.8      | 18.5       | 0.0251                 | 5.2220               | Y          |                              |  | R       | 3.3 E-4   | 4.28 E+6   | 2.5 E+6                | 0.7760               | 22.6925   | R |
| PGN1796 | PG1626 | <i>leucine-rich protein</i>                                                                |           |            |                        |                      |            |                              |  |         |           |            |                        |                      |           |   |
| PG1872  |        | 7.07 E-13                                                                                  | 394.5     | 636.5      | -0.6903                | 10.0098              | G          |                              |  | G       | 9.75 E-6  | 1.46 E+8   | 2.73 E+8               | -0.9079              | 28.6427   | G |
| PGN1800 | PG1630 | <i>hutU urocanate hydratase</i>                                                            |           |            |                        |                      |            |                              |  |         |           |            |                        |                      |           |   |
| PG1875  |        | 6.69 E-1                                                                                   | 1.7       | 1.5        | 0.1901                 | 1.6832               | Y          |                              |  | G       | 0         | 1.85 E+3   | 1.39 E+5               | -6.2340              | 17.1067   | Y |
| PGN1802 | PG1632 | <i>hemolysin</i>                                                                           |           |            |                        |                      |            |                              |  |         |           |            |                        |                      |           |   |

| TIGR    |        | PP PPC / Pg Spectral Count                                |           |            |                        |                      |                                                                                                                                                                                 | PP PPC/ Pg Protein Intensity |           |            |                        |                      |                                                                                         | 33277 |
|---------|--------|-----------------------------------------------------------|-----------|------------|------------------------|----------------------|---------------------------------------------------------------------------------------------------------------------------------------------------------------------------------|------------------------------|-----------|------------|------------------------|----------------------|-----------------------------------------------------------------------------------------|-------|
| PGN     | LANL   | q-value                                                   | PP (Norm) | PPC (Norm) | log <sub>2</sub> Ratio | log <sub>2</sub> Sum | Regulation                                                                                                                                                                      | q-value                      | PP (Norm) | PPC (Norm) | log <sub>2</sub> Ratio | log <sub>2</sub> Sum | Consensus                                                                               |       |
| PG1876  |        | 1.5 E-1                                                   | 1.7       | 6.5        | -1.9253                | 3.0376               | Y   G     | 1.37 E-4                     | 1.85 E+3  | 1.39 E+6   | -9.5564                | 20.4121              | G    |       |
| PGN1803 | PG1633 | <i>conserved hypothetical protein</i>                     |           |            |                        |                      |                                                                                                                                                                                 |                              |           |            |                        |                      |                                                                                         |       |
| PG1877  |        | 6.69 E-1                                                  | 1.7       | 1.5        | 0.1901                 | 1.6832               | Y   G     | 0                            | 1.85 E+3  | 5.5 E+5    | -8.2152                | 19.0738              | Y    |       |
| PGN1804 | PG1634 | <i>nhaA Na+/H+ antiporter</i>                             |           |            |                        |                      |                                                                                                                                                                                 |                              |           |            |                        |                      |                                                                                         |       |
| PG1878  |        | 1.85 E-3                                                  | 54.8      | 24         | 1.1901                 | 6.2994               | R   Y     | 1.69 E-3                     | 1.52 E+7  | 9.87 E+6   | 0.6228                 | 24.5792              | R    |       |
| PGN1805 | PG1635 | <i>cysS cysteinyl-tRNA synthetase</i>                     |           |            |                        |                      |                                                                                                                                                                                 |                              |           |            |                        |                      |                                                                                         |       |
| PG1879  |        | 5.8 E-1                                                   | 26.5      | 30         | -0.1776                | 5.8208               | Y   Y     | 2.52 E-3                     | 1.78 E+7  | 2.97 E+7   | -0.7373                | 25.5040              | Y    |       |
| PGN1806 | PG1636 | <i>conserved hypothetical protein</i>                     |           |            |                        |                      |                                                                                                                                                                                 |                              |           |            |                        |                      |                                                                                         |       |
| PG1880  |        | 5.17 E-1                                                  | 3.4       | 2          | 0.7751                 | 2.4390               | Y   R     | 0                            | 9.4 E+5   | 8.86 E+5   | 0.0842                 | 20.8003              | R    |       |
| PGN1807 | PG1637 | <i>glycosyl transferase group 2 family protein</i>        |           |            |                        |                      |                                                                                                                                                                                 |                              |           |            |                        |                      |                                                                                         |       |
| PG1881  |        | 1.67 E-12                                                 | 2.6       | 52.5       | -4.3542                | 5.7831               | G   G     | 0                            | 8.22 E+5  | 3.81 E+7   | -5.5332                | 25.2133              | G    |       |
| PGN1808 | PG1638 | <i>hypothetical protein PG_1881</i>                       |           |            |                        |                      |                                                                                                                                                                                 |                              |           |            |                        |                      |                                                                                         |       |
| PG1884  |        | 4.53 E-1                                                  | 25.7      | 20.5       | 0.3244                 | 5.5289               | Y   R     | 4.19 E-4                     | 1.03 E+7  | 5.24 E+6   | 0.9701                 | 23.8866              | R    |       |
| PGN1811 | PG1639 | <i>alpha-L-fucosidase precursor putative</i>              |           |            |                        |                      |                                                                                                                                                                                 |                              |           |            |                        |                      |                                                                                         |       |
| PG1885  |        | 8.79 E-3                                                  | 24.0      | 7.5        | 1.6756                 | 4.9754               | R   R     | 1.33 E-12                    | 1.03 E+7  | 1.64 E+6   | 2.6500                 | 23.5097              | R    |       |
| PGN1812 | PG1640 | <i>ppk polyphosphate kinase</i>                           |           |            |                        |                      |                                                                                                                                                                                 |                              |           |            |                        |                      |                                                                                         |       |
| PG1886  |        | 6.69 E-1                                                  | 6.8       | 7.5        | -0.1318                | 3.8425               | Y   Y     | 1.89 E-1                     | 2.01 E+6  | 2.07 E+6   | -0.0384                | 21.9587              | Y    |       |
| PGN1813 | PG1641 | <i>hflX GTP-binding protein HflX</i>                      |           |            |                        |                      |                                                                                                                                                                                 |                              |           |            |                        |                      |                                                                                         |       |
| PG1887  |        | 6.69 E-1                                                  | 3.4       | 3          | 0.1901                 | 2.6832               | Y   R     | 3.16 E-6                     | 1.1 E+6   | 2.6 E+5    | 2.0811                 | 20.3726              | R    |       |
| PGN1814 | PG1642 | <i>rhodanese-like domain protein</i>                      |           |            |                        |                      |                                                                                                                                                                                 |                              |           |            |                        |                      |                                                                                         |       |
| PG1888  |        | 3.82 E-1                                                  | 1.7       | 4          | -1.2249                | 2.5138               | Y   G     | 1.22 E-9                     | 1.85 E+3  | 4.85 E+5   | -8.0350                | 18.8942              | G    |       |
| PGN1815 | PG1643 | <i>conserved hypothetical protein</i>                     |           |            |                        |                      |                                                                                                                                                                                 |                              |           |            |                        |                      |                                                                                         |       |
| PG1889  |        | 5.72 E-1                                                  | 47.1      | 42.5       | 0.1471                 | 6.4848               | Y   R | 9.56 E-9                     | 1.54 E+7  | 8.17 E+6   | 0.9182                 | 24.4928              | R  |       |
| PGN1816 | PG1644 | <i>hypothetical protein PG_1889</i>                       |           |            |                        |                      |                                                                                                                                                                                 |                              |           |            |                        |                      |                                                                                         |       |
|         |        | 5.89 E-1                                                  | 1.7       | 1          | 0.7751                 | 1.4390               | Y   R | 0                            | 1.27 E+5  | 1 E+3      | 6.9893                 | 16.9664              | R  |       |
| PGN1818 |        |                                                           |           |            |                        |                      |                                                                                                                                                                                 |                              |           |            |                        |                      |                                                                                         |       |
|         |        | 5.95 E-1                                                  | 12.0      | 10         | 0.2605                 | 4.4581               | Y   Y | 1.32 E-2                     | 3.33 E+6  | 2.1 E+6    | 0.6660                 | 22.3726              | Y  |       |
| PGN1819 |        |                                                           |           |            |                        |                      |                                                                                                                                                                                 |                              |           |            |                        |                      |                                                                                         |       |
| PG1896  |        | 1.15 E-3                                                  | 55.6      | 101        | -0.8607                | 7.2911               | G   G | 1.68 E-6                     | 3.16 E+7  | 6.11 E+7   | -0.9491                | 26.4668              | G  |       |
| PGN1827 | PG1652 | <i>metK S-adenosylmethionine synthase</i>                 |           |            |                        |                      |                                                                                                                                                                                 |                              |           |            |                        |                      |                                                                                         |       |
| PG1897  |        | 2.74 E-1                                                  | 1.7       | 5          | -1.5468                | 2.7466               | Y   G | 3.47 E-4                     | 1.85 E+3  | 1.85 E+6   | -9.9666                | 20.8217              | G  |       |
| PGN1828 | PG1653 | <i>thiamin pyrophosphokinase catalytic domain protein</i> |           |            |                        |                      |                                                                                                                                                                                 |                              |           |            |                        |                      |                                                                                         |       |
| PG1899  |        | 2.31 E-4                                                  | 77.9      | 137.5      | -0.8204                | 7.7506               | G   G | 1.83 E-4                     | 5.56 E+7  | 1.05 E+8   | -0.9110                | 27.2558              | G  |       |
| PGN1830 | PG1655 | <i>TonB-dependent receptor putative</i>                   |           |            |                        |                      |                                                                                                                                                                                 |                              |           |            |                        |                      |                                                                                         |       |

| TIGR    |        | PP PPC / Pg Spectral Count                            |           |            |                        |                      |            | PP PPC/ Pg Protein Intensity |   |         |           |            |                        | 33277                |           |     |
|---------|--------|-------------------------------------------------------|-----------|------------|------------------------|----------------------|------------|------------------------------|---|---------|-----------|------------|------------------------|----------------------|-----------|-----|
| PGN     | LANL   | q-value                                               | PP (Norm) | PPC (Norm) | log <sub>2</sub> Ratio | log <sub>2</sub> Sum | Regulation |                              |   | q-value | PP (Norm) | PPC (Norm) | log <sub>2</sub> Ratio | log <sub>2</sub> Sum | Consensus |     |
| PG1901  |        | 2.34 E-3                                              | 47.9      | 20         | 1.2605                 | 6.0857               | R          | ●                            | ● | R       | 7.06 E-14 | 7.89 E+7   | 1.82 E+7               | 2.1140               | 26.5335   | R ● |
| PGN1832 | PG1657 | <i>frr</i> ribosome recycling factor                  |           |            |                        |                      |            |                              |   |         |           |            |                        |                      |           |     |
| PG1902  |        | 4.55 E-1                                              | 5.1       | 3          | 0.7751                 | 3.0240               | Y          | ●                            | ● | Y       | 1.72 E-1  | 3.1 E+6    | 2.86 E+6               | 0.1149               | 22.5077   | Y ● |
| PGN1833 | PG1658 | <i>pyrH</i> uridylylate kinase                        |           |            |                        |                      |            |                              |   |         |           |            |                        |                      |           |     |
| PG1903  |        | 1.21 E-2                                              | 24.8      | 8.5        | 1.5456                 | 5.0581               | Y          | ●                            | ● | R       | 8.73 E-11 | 6.18 E+6   | 1.89 E+6               | 1.7087               | 22.9443   | R ● |
| PGN1834 | PG1659 | <i>conserved hypothetical protein</i>                 |           |            |                        |                      |            |                              |   |         |           |            |                        |                      |           |     |
| PG1910  |        | 1.02 E-5                                              | 103.5     | 45.5       | 1.1862                 | 7.2195               | R          | ●                            | ● | Y       | 5.07 E-3  | 7.64 E+7   | 4.94 E+7               | 0.6281               | 26.9063   | R ● |
| PGN1840 | PG1666 | <i>rplQ</i> ribosomal protein L17                     |           |            |                        |                      |            |                              |   |         |           |            |                        |                      |           |     |
| PG1911  |        | 4.13 E-4                                              | 145.5     | 86         | 0.7582                 | 7.8546               | R          | ●                            | ● | R       | 9.81 E-4  | 7.47 E+7   | 3.66 E+7               | 1.0271               | 26.7298   | R ● |
| PGN1841 | PG1667 | <i>rpoA</i> DNA-directed RNA polymerase alpha subunit |           |            |                        |                      |            |                              |   |         |           |            |                        |                      |           |     |
| PG1912  |        | 1.04 E-4                                              | 149.7     | 84.5       | 0.8254                 | 7.8718               | R          | ●                            | ● | R       | 1.04 E-13 | 1.72 E+8   | 6.79 E+7               | 1.3391               | 27.8356   | R ● |
| PGN1842 | PG1668 | <i>rpsD</i> ribosomal protein S4                      |           |            |                        |                      |            |                              |   |         |           |            |                        |                      |           |     |
| PG1913  |        | 2.11 E-4                                              | 39.4      | 11         | 1.8392                 | 5.6542               | R          | ●                            | ● | Y       | 9.55 E-3  | 1.82 E+7   | 1.03 E+7               | 0.8198               | 24.7664   | R ● |
| PGN1843 | PG1669 | <i>rpsK</i> ribosomal protein S11                     |           |            |                        |                      |            |                              |   |         |           |            |                        |                      |           |     |
| PG1914  |        | 5.43 E-1                                              | 31.7      | 27.5       | 0.2032                 | 5.8865               | Y          | ●                            | ● | Y       | 1.22 E-2  | 3.33 E+7   | 1.96 E+7               | 0.7668               | 25.6579   | Y ● |
| PGN1844 | PG1670 | <i>rpsM</i> ribosomal protein S13                     |           |            |                        |                      |            |                              |   |         |           |            |                        |                      |           |     |
| PG1916  |        | 5.43 E-1                                              | 15.4      | 12.5       | 0.3012                 | 4.8023               | Y          | ●                            | ● | R       | 3.62 E-6  | 5.91 E+6   | 2.1 E+6                | 1.4957               | 22.9327   | R ● |
| PGN1846 |        | <i>infA</i> translation initiation factor IF-1        |           |            |                        |                      |            |                              |   |         |           |            |                        |                      |           |     |
| PG1917  |        | 2.6 E-2                                               | 10.3      | 25.5       | -1.3124                | 5.1606               | Y          | ●                            | ● | Y       | 1.87 E-1  | 4.59 E+6   | 4.46 E+6               | 0.0439               | 23.1094   | Y ● |
| PGN1847 | PG1672 | <i>map</i> methionine aminopeptidase type I           |           |            |                        |                      |            |                              |   |         |           |            |                        |                      |           |     |
| PG1918  |        | 4.75 E-1                                              | 25.7      | 31         | -0.2722                | 5.8245               | Y          | ●                            | ● | Y       | 2.1 E-2   | 2.89 E+7   | 1.88 E+7               | 0.6214               | 25.5060   | Y ● |
| PGN1848 | PG1673 | <i>secY</i> preprotein translocase SecY subunit       |           |            |                        |                      |            |                              |   |         |           |            |                        |                      |           |     |
| PG1919  |        | 4.58 E-5                                              | 62.5      | 22         | 1.5055                 | 6.4002               | R          | ●                            | ● | R       | 2.58 E-16 | 3.49 E+7   | 1.05 E+7               | 1.7296               | 25.4383   | R ● |
| PGN1849 | PG1673 | <i>rplO</i> ribosomal protein L15                     |           |            |                        |                      |            |                              |   |         |           |            |                        |                      |           |     |
| PG1920  |        | 1.94 E-2                                              | 40.2      | 19.5       | 1.0443                 | 5.9000               | Y          | ●                            | ● | R       | 2.03 E-6  | 4.75 E+7   | 1.85 E+7               | 1.3615               | 25.9756   | R ● |
| PGN1850 |        | <i>rpmD</i> ribosomal protein L30                     |           |            |                        |                      |            |                              |   |         |           |            |                        |                      |           |     |
| PG1921  |        | 2.82 E-2                                              | 40.2      | 20.5       | 0.9721                 | 5.9240               | Y          | ●                            | ● | Y       | 1.72 E-2  | 4.76 E+7   | 2.71 E+7               | 0.8133               | 26.1544   | Y ● |
| PGN1851 | PG1674 | <i>rpsE</i> ribosomal protein S5                      |           |            |                        |                      |            |                              |   |         |           |            |                        |                      |           |     |
| PG1922  |        | 6.85 E-1                                              | 24.0      | 24.5       | -0.0323                | 5.5987               | Y          | ●                            | ● | Y       | 9.2 E-2   | 2.9 E+7    | 2.38 E+7               | 0.2876               | 25.6533   | Y ● |
| PGN1852 | PG1675 | <i>rplR</i> ribosomal protein L18                     |           |            |                        |                      |            |                              |   |         |           |            |                        |                      |           |     |
| PG1923  |        | 4.37 E-1                                              | 151.5     | 166        | -0.1323                | 8.3104               | Y          | ●                            | ● | Y       | 1.69 E-1  | 1.52 E+8   | 1.58 E+8               | -0.0542              | 28.2041   | Y ● |
| PGN1853 | PG1676 | <i>rplF</i> ribosomal protein L6                      |           |            |                        |                      |            |                              |   |         |           |            |                        |                      |           |     |
| PG1924  |        | 5.89 E-2                                              | 24.8      | 11.5       | 1.1095                 | 5.1825               | Y          | ●                            | ● | Y       | 1.83 E-1  | 3.49 E+7   | 3.3 E+7                | 0.0811               | 26.0167   | Y ● |
| PGN1854 | PG1677 | <i>rpsH</i> ribosomal protein S8                      |           |            |                        |                      |            |                              |   |         |           |            |                        |                      |           |     |

| TIGR    |        | PP PPC / Pg Spectral Count                  |           |            |                        |                      |            | PP PPC/ Pg Protein Intensity |  |         |           |            |                        | 33277                |           |   |
|---------|--------|---------------------------------------------|-----------|------------|------------------------|----------------------|------------|------------------------------|--|---------|-----------|------------|------------------------|----------------------|-----------|---|
| PGN     | LANL   | q-value                                     | PP (Norm) | PPC (Norm) | log <sub>2</sub> Ratio | log <sub>2</sub> Sum | Regulation |                              |  | q-value | PP (Norm) | PPC (Norm) | log <sub>2</sub> Ratio | log <sub>2</sub> Sum | Consensus |   |
| PG1925  |        | 6.69 E-1                                    | 1.7       | 1.5        | 0.1901                 | 1.6832               | Y          |                              |  | G       | 0         | 1.85 E+3   | 2.5 E+6                | -10.4023             | 21.2571   | Y |
| PGN1855 | PG1678 | <i>rpsN ribosomal protein S14</i>           |           |            |                        |                      |            |                              |  |         |           |            |                        |                      |           |   |
| PG1926  |        | 4.87 E-11                                   | 313.2     | 162.5      | 0.9465                 | 8.8938               | R          |                              |  | Y       | 1.23 E-1  | 1.12 E+8   | 1.03 E+8               | 0.1220               | 27.6845   | R |
| PGN1856 | PG1679 | <i>rplE ribosomal protein L5</i>            |           |            |                        |                      |            |                              |  |         |           |            |                        |                      |           |   |
| PG1927  |        | 7.93 E-2                                    | 26.5      | 13.5       | 0.9744                 | 5.3228               | Y          |                              |  | R       | 7.88 E-5  | 3.36 E+7   | 1.54 E+7               | 1.1269               | 25.5464   | R |
| PGN1857 | PG1680 | <i>rplX ribosomal protein L24</i>           |           |            |                        |                      |            |                              |  |         |           |            |                        |                      |           |   |
| PG1928  |        | 2.31 E-15                                   | 95.8      | 14         | 2.7751                 | 6.7792               | R          |                              |  | R       | 3.44 E-15 | 4.27 E+7   | 1.08 E+7               | 1.9854               | 25.6710   | R |
| PGN1858 | PG1681 | <i>rplN ribosomal protein L14</i>           |           |            |                        |                      |            |                              |  |         |           |            |                        |                      |           |   |
| PG1929  |        | 2.15 E-3                                    | 12.8      | 1          | 3.6820                 | 3.7902               | Y          |                              |  | R       | 3.24 E-7  | 6.65 E+6   | 1 E+3                  | 12.7000              | 22.6660   | R |
| PGN1859 | PG1682 | <i>rpsQ ribosomal protein S17</i>           |           |            |                        |                      |            |                              |  |         |           |            |                        |                      |           |   |
| PG1930  |        | 6.05 E-2                                    | 6.8       | 1          | 2.7751                 | 2.9718               | Y          |                              |  | R       | 4.06 E-6  | 9.46 E+6   | 1 E+3                  | 13.2080              | 23.1740   | R |
| PGN1860 |        | <i>rpmC ribosomal protein L29</i>           |           |            |                        |                      |            |                              |  |         |           |            |                        |                      |           |   |
| PG1931  |        | 6.69 E-1                                    | 13.7      | 13         | 0.0747                 | 4.7383               | Y          |                              |  | Y       | 1.45 E-1  | 1.89 E+7   | 1.75 E+7               | 0.1098               | 25.1143   | Y |
| PGN1861 | PG1683 | <i>rplP ribosomal protein L16</i>           |           |            |                        |                      |            |                              |  |         |           |            |                        |                      |           |   |
| PG1932  |        | 3.3 E-4                                     | 107.8     | 57         | 0.9195                 | 7.3647               | R          |                              |  | Y       | 2.88 E-3  | 7.26 E+7   | 4.93 E+7               | 0.5598               | 26.8614   | R |
| PGN1862 | PG1684 | <i>rpsC ribosomal protein S3</i>            |           |            |                        |                      |            |                              |  |         |           |            |                        |                      |           |   |
| PG1933  |        | 2.15 E-1                                    | 27.4      | 17.5       | 0.6458                 | 5.4880               | Y          |                              |  | Y       | 7.62 E-2  | 1.61 E+7   | 1.2 E+7                | 0.4212               | 24.7430   | Y |
| PGN1863 | PG1685 | <i>rplV ribosomal protein L22</i>           |           |            |                        |                      |            |                              |  |         |           |            |                        |                      |           |   |
| PG1934  |        | 1.74 E-3                                    | 24.0      | 5.5        | 2.1230                 | 4.8806               | R          |                              |  | R       | 2.61 E-14 | 2.12 E+7   | 1.98 E+6               | 3.4177               | 24.4654   | R |
| PGN1864 | PG1686 | <i>rpsS ribosomal protein S19</i>           |           |            |                        |                      |            |                              |  |         |           |            |                        |                      |           |   |
| PG1935  |        | 3.16 E-3                                    | 27.4      | 8          | 1.7751                 | 5.1449               | R          |                              |  | R       | 0         | 3.13 E+7   | 3.6 E+6                | 3.1205               | 25.0551   | R |
| PGN1865 | PG1687 | <i>rplB ribosomal protein L2</i>            |           |            |                        |                      |            |                              |  |         |           |            |                        |                      |           |   |
| PG1936  |        | 2.27 E-2                                    | 11.1      | 2          | 2.4755                 | 3.7141               | Y          |                              |  | R       | 0         | 4.1 E+6    | 6.89 E+5               | 2.5744               | 22.1923   | R |
| PGN1866 | PG1688 | <i>rplW ribosomal protein L23</i>           |           |            |                        |                      |            |                              |  |         |           |            |                        |                      |           |   |
| PG1937  |        | 0                                           | 177.1     | 28         | 2.6612                 | 7.6803               | R          |                              |  | R       | 0         | 1.11 E+8   | 1.55 E+7               | 2.8445               | 26.9177   | R |
| PGN1867 | PG1689 | <i>rplD ribosomal protein L4</i>            |           |            |                        |                      |            |                              |  |         |           |            |                        |                      |           |   |
| PG1938  |        | 7.31 E-2                                    | 93.3      | 66.5       | 0.4880                 | 7.3198               | Y          |                              |  | Y       | 1.16 E-2  | 7.4 E+7    | 5.08 E+7               | 0.5411               | 26.8949   | Y |
| PGN1868 | PG1690 | <i>rplC ribosomal protein L3</i>            |           |            |                        |                      |            |                              |  |         |           |            |                        |                      |           |   |
| PG1939  |        | 4.02 E-4                                    | 129.2     | 73.5       | 0.8138                 | 7.6632               | R          |                              |  | Y       | 2.48 E-3  | 8.12 E+7   | 4.64 E+7               | 0.8072               | 26.9266   | R |
| PGN1869 | PG1691 | <i>rpsJ ribosomal protein S10</i>           |           |            |                        |                      |            |                              |  |         |           |            |                        |                      |           |   |
| PG1940  |        | 0                                           | 634.0     | 89         | 2.8327                 | 9.4979               | R          |                              |  | R       | 0         | 4.8 E+8    | 8.95 E+7               | 2.4232               | 29.0853   | R |
| PGN1870 | PG1692 | <i>fusA translation elongation factor G</i> |           |            |                        |                      |            |                              |  |         |           |            |                        |                      |           |   |
| PG1941  |        | 6.66 E-3                                    | 62.5      | 32.5       | 0.9426                 | 6.5693               | R          |                              |  | R       | 1.16 E-6  | 7.28 E+7   | 3.2 E+7                | 1.1844               | 26.6436   | R |
| PGN1871 | PG1693 | <i>rpsG ribosomal protein S7</i>            |           |            |                        |                      |            |                              |  |         |           |            |                        |                      |           |   |



| TIGR    |        | PP PPC / Pg Spectral Count                      |           |            |                        |                      |            | PP PPC/ Pg Protein Intensity |  |         |           |            |                        | 33277                |           |   |
|---------|--------|-------------------------------------------------|-----------|------------|------------------------|----------------------|------------|------------------------------|--|---------|-----------|------------|------------------------|----------------------|-----------|---|
| PGN     | LANL   | q-value                                         | PP (Norm) | PPC (Norm) | log <sub>2</sub> Ratio | log <sub>2</sub> Sum | Regulation |                              |  | q-value | PP (Norm) | PPC (Norm) | log <sub>2</sub> Ratio | log <sub>2</sub> Sum | Consensus |   |
| PG1942  |        | 3.05 E-1                                        | 3.4       | 1          | 1.7751                 | 2.1449               | Y          |                              |  | Y       | 1.42 E-3  | 2.77 E+6   | 1 E+3                  | 11.4345              | 21.4008   | Y |
| PGN1872 | PG1694 | <i>rpsL ribosomal protein S12</i>               |           |            |                        |                      |            |                              |  |         |           |            |                        |                      |           |   |
| PG1947  |        | 4.41 E-1                                        | 10.3      | 7          | 0.5527                 | 4.1100               | Y          |                              |  | Y       | 1.38 E-1  | 2.46 E+6   | 2.19 E+6               | 0.1699               | 22.1497   | Y |
| PGN1877 | PG1699 | <i>TPR domain protein</i>                       |           |            |                        |                      |            |                              |  |         |           |            |                        |                      |           |   |
| PG1948  |        | 3.82 E-3                                        | 169.4     | 235.5      | -0.4751                | 8.6615               | G          |                              |  | Y       | 1.01 E-2  | 1.2 E+8    | 1.54 E+8               | -0.3531              | 28.0301   | G |
| PGN1878 | PG1700 | <i>lipoprotein putative</i>                     |           |            |                        |                      |            |                              |  |         |           |            |                        |                      |           |   |
| PG1949  |        | 2.8 E-2                                         | 206.2     | 157.5      | 0.3888                 | 8.5067               | Y          |                              |  | Y       | 2.72 E-2  | 1.34 E+8   | 1.94 E+8               | -0.5320              | 28.2922   | Y |
| PGN1880 | PG1701 | <i>mdh malate dehydrogenase</i>                 |           |            |                        |                      |            |                              |  |         |           |            |                        |                      |           |   |
| PG1950  |        | 1.86 E-1                                        | 5.1       | 11.5       | -1.1635                | 4.0561               | Y          |                              |  | Y       | 9.67 E-3  | 2.33 E+6   | 3.73 E+6               | -0.6799              | 22.5295   | Y |
| PGN1882 | PG1703 | <i>membrane protein putative</i>                |           |            |                        |                      |            |                              |  |         |           |            |                        |                      |           |   |
| PG1951  |        | 3.78 E-2                                        | 71.0      | 103        | -0.5364                | 7.4431               | Y          |                              |  | Y       | 1.66 E-3  | 4.21 E+7   | 6.4 E+7                | -0.6040              | 26.6603   | Y |
| PGN1883 | PG1704 | <i>glnS glutaminyl-tRNA synthetase</i>          |           |            |                        |                      |            |                              |  |         |           |            |                        |                      |           |   |
| PG1952  |        | 7.06 E-1                                        | 6.0       | 6          | -0.0025                | 3.5837               | Y          |                              |  | R       | 1.24 E-4  | 6.07 E+6   | 2.84 E+6               | 1.0939               | 23.0865   | Y |
| PGN1884 | PG1705 | <i>DedA family protein</i>                      |           |            |                        |                      |            |                              |  |         |           |            |                        |                      |           |   |
| PG1953  |        | 3.88 E-1                                        | 31.7      | 24.5       | 0.3698                 | 5.8114               | Y          |                              |  | Y       | 1.89 E-1  | 1.83 E+7   | 1.87 E+7               | -0.0316              | 25.1399   | Y |
| PGN1885 | PG1706 | <i>YitT family protein</i>                      |           |            |                        |                      |            |                              |  |         |           |            |                        |                      |           |   |
| PG1956  |        | 2.02 E-1                                        | 51.3      | 37         | 0.4725                 | 6.4650               | Y          |                              |  | R       | 4.32 E-4  | 2.39 E+7   | 1.47 E+7               | 0.7033               | 25.2024   | R |
| PGN1888 | PG1708 | <i>abfT-2 4-hydroxybutyrate CoA-transferase</i> |           |            |                        |                      |            |                              |  |         |           |            |                        |                      |           |   |
|         |        | 4.23 E-1                                        | 2.6       | 1          | 1.3601                 | 1.8347               | Y          |                              |  | R       | 0         | 2.99 E+6   | 1 E+3                  | 11.5467              | 21.5130   | R |
| PGN1889 |        |                                                 |           |            |                        |                      |            |                              |  |         |           |            |                        |                      |           |   |
| PG1959  |        | 6.69 E-1                                        | 1.7       | 1.5        | 0.1901                 | 1.6832               | Y          |                              |  | G       | 0         | 1.85 E+3   | 1.37 E+5               | -6.2097              | 17.0828   | Y |
| PGN1890 | PG1710 | <i>rpmG ribosomal protein L33</i>               |           |            |                        |                      |            |                              |  |         |           |            |                        |                      |           |   |
| PG1960  |        | 3.68 E-1                                        | 11.1      | 16.5       | -0.5689                | 4.7878               | Y          |                              |  | Y       | 2.16 E-2  | 1.02 E+7   | 5.91 E+6               | 0.7878               | 23.9421   | Y |
| PGN1891 | PG1710 | <i>rpmB ribosomal protein L28</i>               |           |            |                        |                      |            |                              |  |         |           |            |                        |                      |           |   |
| PG1961  |        | 6.97 E-1                                        | 2.6       | 2.5        | 0.0381                 | 2.3411               | Y          |                              |  | Y       | 1.11 E-1  | 9.09 E+5   | 7.22 E+5               | 0.3328               | 20.6366   | Y |
| PGN1892 | PG1711 | <i>hypothetical protein PG_1961</i>             |           |            |                        |                      |            |                              |  |         |           |            |                        |                      |           |   |
|         |        | 3.82 E-1                                        | 1.7       | 4          | -1.2249                | 2.5138               | Y          |                              |  | G       | 2.11 E-6  | 1.85 E+3   | 9.67 E+5               | -9.0300              | 19.8865   | G |
| PGN1893 |        |                                                 |           |            |                        |                      |            |                              |  |         |           |            |                        |                      |           |   |
| PG1964  |        | 6.69 E-1                                        | 1.7       | 2          | -0.2249                | 1.8919               | Y          |                              |  | Y       | 1.27 E-2  | 1.85 E+3   | 5.84 E+5               | -8.3009              | 19.1592   | Y |
| PGN1896 | PG1715 | <i>bacterial sugar transferase</i>              |           |            |                        |                      |            |                              |  |         |           |            |                        |                      |           |   |
| PG1966  |        | 5.17 E-1                                        | 1.7       | 3          | -0.8099                | 2.2361               | Y          |                              |  | Y       | 1.52 E-3  | 1.85 E+3   | 1.34 E+6               | -9.5025              | 20.3582   | Y |
| PGN1898 | PG1717 | <i>conserved hypothetical protein</i>           |           |            |                        |                      |            |                              |  |         |           |            |                        |                      |           |   |
|         |        | 1.73 E-1                                        | 31.7      | 46         | -0.5390                | 6.2791               | Y          |                              |  | G       | 1.01 E-5  | 1.45 E+7   | 3.09 E+7               | -1.0891              | 25.4379   | G |
| PGN1903 |        |                                                 |           |            |                        |                      |            |                              |  |         |           |            |                        |                      |           |   |



| TIGR    |        | PP PPC / Pg Spectral Count                       |           |            |                        |                      |            | PP PPC/ Pg Protein Intensity |  |         |           |            |                        | 33277                |           |   |
|---------|--------|--------------------------------------------------|-----------|------------|------------------------|----------------------|------------|------------------------------|--|---------|-----------|------------|------------------------|----------------------|-----------|---|
| PGN     | LANL   | q-value                                          | PP (Norm) | PPC (Norm) | log <sub>2</sub> Ratio | log <sub>2</sub> Sum | Regulation |                              |  | q-value | PP (Norm) | PPC (Norm) | log <sub>2</sub> Ratio | log <sub>2</sub> Sum | Consensus |   |
| PG1972  |        | 5.8 E-4                                          | 200.2     | 284.5      | -0.5068                | 8.9210               | G          |                              |  | Y       | 2.76 E-3  | 2.86 E+8   | 3.98 E+8               | -0.4743              | 29.3488   | G |
| PGN1904 | PG1721 | <i>hemagglutinin protein HagB</i>                |           |            |                        |                      |            |                              |  |         |           |            |                        |                      |           |   |
| PG1977  |        | 2.74 E-1                                         | 1.7       | 5          | -1.5468                | 2.7466               | Y          |                              |  | Y       | 2.02 E-2  | 1.85 E+3   | 5.18 E+5               | -8.1292              | 18.9881   | Y |
| PGN1907 | PG1726 | <i>hypothetical protein PG_1977</i>              |           |            |                        |                      |            |                              |  |         |           |            |                        |                      |           |   |
|         |        | 4.23 E-1                                         | 2.6       | 1          | 1.3601                 | 1.8347               | Y          |                              |  | R       | 0         | 1.69 E+6   | 1 E+3                  | 10.7218              | 20.6885   | R |
| PGN1910 |        |                                                  |           |            |                        |                      |            |                              |  |         |           |            |                        |                      |           |   |
| PG1983  |        | 3.05 E-1                                         | 18.0      | 11.5       | 0.6439                 | 4.8811               | Y          |                              |  | Y       | 3.02 E-2  | 1.01 E+7   | 6.9 E+6                | 0.5486               | 24.0194   | Y |
| PGN1928 | PG1731 | <i>CRISPR-associated protein TM1791 family</i>   |           |            |                        |                      |            |                              |  |         |           |            |                        |                      |           |   |
| PG1984  |        | 3.37 E-1                                         | 12.0      | 18         | -0.5875                | 4.9059               | Y          |                              |  | Y       | 1.38 E-1  | 4.57 E+6   | 5.11 E+6               | -0.1624              | 23.2062   | Y |
| PGN1929 | PG1732 | <i>hypothetical protein PG_1984</i>              |           |            |                        |                      |            |                              |  |         |           |            |                        |                      |           |   |
| PG1985  |        | 3.85 E-1                                         | 15.4      | 10.5       | 0.5527                 | 4.6950               | Y          |                              |  | Y       | 3.98 E-2  | 1.09 E+7   | 1.56 E+7               | -0.5164              | 24.6620   | Y |
| PGN1930 | PG1733 | <i>CRISPR-associated protein TM1792 family</i>   |           |            |                        |                      |            |                              |  |         |           |            |                        |                      |           |   |
| PG1986  |        | 4.93 E-1                                         | 18.8      | 15         | 0.3276                 | 5.0800               | Y          |                              |  | R       | 3.28 E-9  | 6.75 E+6   | 2.66 E+6               | 1.3424               | 23.1665   | R |
| PGN1931 | PG1734 | <i>CRISPR-associated protein TM1793 family</i>   |           |            |                        |                      |            |                              |  |         |           |            |                        |                      |           |   |
| PG1987  |        | 2.8 E-1                                          | 11.1      | 18         | -0.6944                | 4.8641               | Y          |                              |  | Y       | 7.67 E-3  | 3.07 E+6   | 5.6 E+6                | -0.8691              | 23.0470   | Y |
| PGN1932 | PG1735 | <i>CRISPR-associated protein TM1811 family</i>   |           |            |                        |                      |            |                              |  |         |           |            |                        |                      |           |   |
| PG1988  |        | 5.43 E-1                                         | 16.3      | 19.5       | -0.2624                | 5.1602               | Y          |                              |  | Y       | 1.08 E-1  | 7.7 E+6    | 6.38 E+6               | 0.2708               | 23.7471   | Y |
| PGN1933 | PG1736 | <i>hypothetical protein PG_1988</i>              |           |            |                        |                      |            |                              |  |         |           |            |                        |                      |           |   |
|         |        | 7.43 E-2                                         | 6.8       | 17         | -1.3124                | 4.5756               | Y          |                              |  | Y       | 8.87 E-3  | 1.87 E+6   | 3.06 E+6               | -0.7107              | 22.2341   | Y |
| PGN1935 |        |                                                  |           |            |                        |                      |            |                              |  |         |           |            |                        |                      |           |   |
| PG1992  |        | 4.21 E-1                                         | 3.4       | 1.5        | 1.1901                 | 2.2994               | Y          |                              |  | R       | 1.36 E-6  | 1.74 E+6   | 4.18 E+5               | 2.0619               | 21.0436   | R |
| PGN1937 | PG1739 | <i>gidA glucose-inhibited division protein A</i> |           |            |                        |                      |            |                              |  |         |           |            |                        |                      |           |   |
| PG1993  |        | 6.69 E-1                                         | 1.7       | 1.5        | 0.1901                 | 1.6832               | Y          |                              |  | G       | 0         | 1.85 E+3   | 1.19 E+5               | -6.0095              | 16.8854   | Y |
| PGN1938 | PG1740 | <i>uvrC excinuclease ABC C subunit</i>           |           |            |                        |                      |            |                              |  |         |           |            |                        |                      |           |   |
| PG1994  |        | 2.93 E-1                                         | 6.8       | 3          | 1.1901                 | 3.2994               | Y          |                              |  | R       | 2.63 E-5  | 5.2 E+6    | 1.82 E+6               | 1.5127               | 22.7447   | R |
| PGN1939 | PG1741 | <i>dtd D-tyrosyl-tRNA(Tyr) deacylase</i>         |           |            |                        |                      |            |                              |  |         |           |            |                        |                      |           |   |
| PG1996  |        | 2.66 E-1                                         | 68.5      | 85         | -0.3124                | 7.2616               | Y          |                              |  | Y       | 3.62 E-2  | 3.48 E+7   | 5.47 E+7               | -0.6539              | 26.4147   | Y |
| PGN1941 | PG1743 | <i>deoC deoxyribose-phosphate aldolase</i>       |           |            |                        |                      |            |                              |  |         |           |            |                        |                      |           |   |
| PG1998  |        | 1.06 E-1                                         | 20.5      | 10         | 1.0381                 | 4.9324               | Y          |                              |  | R       | 7.32 E-7  | 7.75 E+6   | 3.21 E+6               | 1.2693               | 23.3858   | R |
| PGN1943 | PG1744 | <i>polyprenyl synthetase</i>                     |           |            |                        |                      |            |                              |  |         |           |            |                        |                      |           |   |
| PG2001  |        | 4.4 E-1                                          | 18.0      | 13.5       | 0.4125                 | 4.9758               | Y          |                              |  | R       | 8.78 E-6  | 1.31 E+7   | 6.45 E+6               | 1.0257               | 24.2222   | R |
| PGN1946 | PG1747 | <i>lepB signal peptidase I</i>                   |           |            |                        |                      |            |                              |  |         |           |            |                        |                      |           |   |
| PG2002  |        | 3.99 E-1                                         | 17.1      | 23         | -0.4265                | 5.3260               | Y          |                              |  | Y       | 4.24 E-2  | 5.19 E+6   | 6.92 E+6               | -0.4146              | 23.5297   | Y |
| PGN1947 | PG1748 | <i>dapB dihydrodipicolinate reductase</i>        |           |            |                        |                      |            |                              |  |         |           |            |                        |                      |           |   |

| TIGR    |        | PP PPC / Pg Spectral Count                                |           |            |                        |                      |            | PP PPC/ Pg Protein Intensity |  |         |           |            |                        | 33277                |           |   |
|---------|--------|-----------------------------------------------------------|-----------|------------|------------------------|----------------------|------------|------------------------------|--|---------|-----------|------------|------------------------|----------------------|-----------|---|
| PGN     | LANL   | q-value                                                   | PP (Norm) | PPC (Norm) | log <sub>2</sub> Ratio | log <sub>2</sub> Sum | Regulation |                              |  | q-value | PP (Norm) | PPC (Norm) | log <sub>2</sub> Ratio | log <sub>2</sub> Sum | Consensus |   |
| PG2003  |        | 4.02 E-1                                                  | 7.7       | 4.5        | 0.7751                 | 3.6089               | Y          |                              |  | Y       | 7.74 E-2  | 1.82 E+6   | 2.56 E+6               | -0.4959              | 22.0617   | Y |
| PGN1948 | PG1749 | <i>dgt deoxyguanosinetriphosphate triphosphohydrolase</i> |           |            |                        |                      |            |                              |  |         |           |            |                        |                      |           |   |
| PG2008  |        | 1.63 E-3                                                  | 17.1      | 44.5       | -1.3787                | 5.9452               | G          |                              |  | G       | 1.2 E-8   | 5.14 E+6   | 2.13 E+7               | -2.0541              | 24.6585   | G |
| PGN1953 | PG1752 | <i>TonB-dependent receptor putative</i>                   |           |            |                        |                      |            |                              |  |         |           |            |                        |                      |           |   |
| PG2010  |        | 2.93 E-1                                                  | 111.2     | 93.5       | 0.2506                 | 7.6776               | Y          |                              |  | R       | 4.24 E-5  | 7.65 E+7   | 4.96 E+7               | 0.6241               | 26.9096   | R |
| PGN1955 | PG1754 | <i>phosphomannomutase putative</i>                        |           |            |                        |                      |            |                              |  |         |           |            |                        |                      |           |   |
| PG2014  |        | 5.8 E-1                                                   | 7.7       | 6          | 0.3601                 | 3.7762               | Y          |                              |  | Y       | 1.74 E-3  | 1.62 E+6   | 8.9 E+5                | 0.8655               | 21.2597   | Y |
| PGN1960 | PG1758 | <i>cas1 CRISPR-associated protein Cas1</i>                |           |            |                        |                      |            |                              |  |         |           |            |                        |                      |           |   |
| PG2015  |        | 6.69 E-1                                                  | 1.7       | 2          | -0.2249                | 1.8919               | Y          |                              |  | Y       | 1.08 E-3  | 1.85 E+3   | 2.66 E+5               | -7.1660              | 18.0297   | Y |
| PGN1961 | PG1759 | <i>cas4 CRISPR-associated protein Cas4</i>                |           |            |                        |                      |            |                              |  |         |           |            |                        |                      |           |   |
|         |        | 1.09 E-1                                                  | 269.5     | 227        | 0.2478                 | 8.9557               | Y          |                              |  | R       | 3.5 E-6   | 1.36 E+8   | 9.16 E+7               | 0.5745               | 27.7647   | R |
| PGN1962 |        |                                                           |           |            |                        |                      |            |                              |  |         |           |            |                        |                      |           |   |
|         |        | 6.69 E-1                                                  | 68.5      | 70.5       | -0.0425                | 7.1184               | Y          |                              |  | Y       | 2.04 E-2  | 4.56 E+7   | 5.75 E+7               | -0.3362              | 26.6197   | Y |
| PGN1963 |        |                                                           |           |            |                        |                      |            |                              |  |         |           |            |                        |                      |           |   |
| PG2016  |        | 1.73 E-2                                                  | 1.7       | 11         | -2.6843                | 3.6680               | Y          |                              |  | Y       | 2.64 E-3  | 1.85 E+3   | 3.54 E+6               | -10.9034             | 21.7579   | Y |
| PGN1964 | PG1760 | <i>cas3 CRISPR-associated helicase Cas3</i>               |           |            |                        |                      |            |                              |  |         |           |            |                        |                      |           |   |
|         |        | 3.29 E-1                                                  | 10.3      | 16         | -0.6399                | 4.7152               | Y          |                              |  | Y       | 2.53 E-3  | 5.97 E+6   | 9.77 E+6               | -0.7114              | 23.9081   | Y |
| PGN1965 |        |                                                           |           |            |                        |                      |            |                              |  |         |           |            |                        |                      |           |   |
| PG2020  |        | 3.78 E-1                                                  | 25.7      | 19         | 0.4341                 | 5.4812               | Y          |                              |  | Y       | 1.01 E-1  | 1.9 E+7    | 1.62 E+7               | 0.2370               | 25.0692   | Y |
| PGN1966 | PG1764 | <i>CRISPR-associated protein TM1814 family</i>            |           |            |                        |                      |            |                              |  |         |           |            |                        |                      |           |   |
| PG2021  |        | 6 E-1                                                     | 1.7       | 2.5        | -0.5468                | 2.0743               | Y          |                              |  | Y       | 1.14 E-3  | 1.85 E+3   | 4.79 E+5               | -8.0154              | 18.8746   | Y |
| PGN1967 | PG1765 | <i>conserved hypothetical protein</i>                     |           |            |                        |                      |            |                              |  |         |           |            |                        |                      |           |   |
| PG2022  |        | 6.49 E-1                                                  | 17.1      | 15.5       | 0.1428                 | 5.0274               | Y          |                              |  | Y       | 3.76 E-2  | 8.55 E+6   | 6.51 E+6               | 0.3942               | 23.8441   | Y |
| PGN1968 | PG1766 | <i>hypothetical protein PG_2022</i>                       |           |            |                        |                      |            |                              |  |         |           |            |                        |                      |           |   |
| PG2023  |        | 1.57 E-2                                                  | 40.2      | 19         | 1.0818                 | 5.8879               | Y          |                              |  | R       | 1.87 E-7  | 1.46 E+7   | 5.87 E+6               | 1.3153               | 24.2883   | R |
| PGN1969 | PG1767 | <i>fnt methionyl-tRNA formyltransferase</i>               |           |            |                        |                      |            |                              |  |         |           |            |                        |                      |           |   |
|         |        | 4.89 E-2                                                  | 519.4     | 597        | -0.2009                | 10.1246              | Y          |                              |  | Y       | 2.79 E-2  | 4.61 E+8   | 5.62 E+8               | -0.2876              | 29.9298   | Y |
| PGN1970 |        |                                                           |           |            |                        |                      |            |                              |  |         |           |            |                        |                      |           |   |
| PG2026  |        | 2.25 E-1                                                  | 1.7       | 5.5        | -1.6843                | 2.8503               | Y          |                              |  | Y       | 4.02 E-3  | 1.85 E+3   | 2.71 E+6               | -10.5186             | 21.3733   | Y |
| PGN1973 | PG1769 | <i>phosphoglycerate mutase family protein</i>             |           |            |                        |                      |            |                              |  |         |           |            |                        |                      |           |   |
| PG2029  |        | 4.23 E-1                                                  | 191.7     | 209        | -0.1249                | 8.6463               | Y          |                              |  | Y       | 4.45 E-2  | 1.7 E+8    | 1.9 E+8                | -0.1638              | 28.4251   | Y |
| PGN1976 | PG1772 | <i>hypothetical protein PG_2029</i>                       |           |            |                        |                      |            |                              |  |         |           |            |                        |                      |           |   |
| PG2031  |        | 6.41 E-1                                                  | 6.0       | 5          | 0.2605                 | 3.4581               | Y          |                              |  | Y       | 6.16 E-2  | 1.21 E+6   | 7.16 E+5               | 0.7569               | 20.8780   | Y |
| PGN1978 | PG1774 | <i>hypothetical protein PG_2031</i>                       |           |            |                        |                      |            |                              |  |         |           |            |                        |                      |           |   |

| TIGR    |        | PP PPC / Pg Spectral Count                                |           |            |                        |                      |            | PP PPC/ Pg Protein Intensity |           |            |                        |                      |           | 33277 |
|---------|--------|-----------------------------------------------------------|-----------|------------|------------------------|----------------------|------------|------------------------------|-----------|------------|------------------------|----------------------|-----------|-------|
| PGN     | LANL   | q-value                                                   | PP (Norm) | PPC (Norm) | log <sub>2</sub> Ratio | log <sub>2</sub> Sum | Regulation | q-value                      | PP (Norm) | PPC (Norm) | log <sub>2</sub> Ratio | log <sub>2</sub> Sum | Consensus |       |
| PG2033  |        | 4.93 E-1                                                  | 8.6       | 11.5       | -0.4265                | 4.3260               | Y ●● Y     | 1.01 E-1                     | 3.49 E+6  | 2.79 E+6   | 0.3218                 | 22.5826              | Y ●       |       |
| PGN1980 | PG1776 | <i>gltD glutamate synthase small subunit</i>              |           |            |                        |                      |            |                              |           |            |                        |                      |           |       |
| PG2034  |        | 2.92 E-1                                                  | 31.7      | 22.5       | 0.4927                 | 5.7591               | Y ●● Y     | 1.52 E-1                     | 1.09 E+7  | 1.23 E+7   | -0.1780                | 24.4691              | Y ●       |       |
| PGN1981 | PG1777 | <i>oxidoreductase FAD-binding putative</i>                |           |            |                        |                      |            |                              |           |            |                        |                      |           |       |
| PG2036  |        | 2.15 E-1                                                  | 4.3       | 1          | 2.0970                 | 2.4001               | Y ●● Y     | 2.02 E-3                     | 5.73 E+6  | 1 E+3      | 12.4843                | 22.4504              | Y ●       |       |
| PGN1983 | PG1779 | <i>ion transporter</i>                                    |           |            |                        |                      |            |                              |           |            |                        |                      |           |       |
| PG2040  |        | 3.82 E-1                                                  | 1.7       | 4          | -1.2249                | 2.5138               | Y ●● G     | 4.25 E-5                     | 1.85 E+3  | 3.36 E+6   | -10.8246               | 21.6791              | G ●       |       |
| PGN1986 | PG1781 | <i>DNA-binding protein histone-like family</i>            |           |            |                        |                      |            |                              |           |            |                        |                      |           |       |
| PG2041  |        | 6.05 E-2                                                  | 1.7       | 8.5        | -2.3124                | 3.3521               | Y ●● G     | 9.91 E-15                    | 1.85 E+3  | 1.94 E+6   | -10.0330               | 20.8881              | G ●       |       |
| PGN1987 | PG1782 | <i>hypothetical protein PG_2041</i>                       |           |            |                        |                      |            |                              |           |            |                        |                      |           |       |
| PG2042  |        | 3.93 E-1                                                  | 4.3       | 7.5        | -0.8099                | 3.5581               | Y ●● G     | 8.96 E-4                     | 1.94 E+6  | 3.33 E+6   | -0.7795                | 22.3293              | G ●       |       |
| PGN1988 | PG1783 | <i>thioredoxin family protein</i>                         |           |            |                        |                      |            |                              |           |            |                        |                      |           |       |
| PG2043  |        | 1.45 E-1                                                  | 40.2      | 26         | 0.6292                 | 6.0491               | Y ●● Y     | 3.61 E-2                     | 8.2 E+6   | 5.92 E+6   | 0.4701                 | 23.7510              | Y ●       |       |
| PGN1989 | PG1784 | <i>conserved hypothetical protein TIGR00486</i>           |           |            |                        |                      |            |                              |           |            |                        |                      |           |       |
| PG2044  |        | 8.62 E-3                                                  | 49.6      | 24         | 1.0481                 | 6.2022               | R ●● R     | 6.97 E-4                     | 2.88 E+7  | 1.58 E+7   | 0.8676                 | 25.4109              | R ●       |       |
| PGN1990 | PG1785 | <i>conserved hypothetical protein</i>                     |           |            |                        |                      |            |                              |           |            |                        |                      |           |       |
| PG2050  |        | 1.98 E-2                                                  | 57.3      | 32         | 0.8412                 | 6.4811               | Y ●● Y     | 1.94 E-1                     | 6.9 E+7   | 6.79 E+7   | 0.0240                 | 27.0280              | Y ●       |       |
| PGN1995 | PG1790 | <i>hypothetical protein PG_2050</i>                       |           |            |                        |                      |            |                              |           |            |                        |                      |           |       |
| PG2052  |        | 6.41 E-1                                                  | 16.3      | 18         | -0.1469                | 5.0983               | Y ●● Y     | 1.74 E-1                     | 1.35 E+7  | 1.41 E+7   | -0.0636                | 24.7139              | Y ●       |       |
| PGN1996 | PG1791 | <i>dapA dihydrodipicolinate synthase</i>                  |           |            |                        |                      |            |                              |           |            |                        |                      |           |       |
| PG2053  |        | 5.43 E-1                                                  | 2.6       | 1.5        | 0.7751                 | 2.0240               | Y ●● R     | 0                            | 1.25 E+6  | 1.08 E+6   | 0.2073                 | 21.1561              | R ●       |       |
| PGN1997 | PG1792 | <i>bioD dethiobiotin synthase</i>                         |           |            |                        |                      |            |                              |           |            |                        |                      |           |       |
| PG2054  |        | 6.94 E-1                                                  | 35.1      | 35.5       | -0.0171                | 6.1412               | Y ●● Y     | 7.15 E-2                     | 2.78 E+7  | 3.69 E+7   | -0.4078                | 25.9486              | Y ●       |       |
| PGN1998 | PG1793 | <i>lipoprotein PG3</i>                                    |           |            |                        |                      |            |                              |           |            |                        |                      |           |       |
| PG2055  |        | 6.74 E-1                                                  | 178.0     | 176        | 0.0161                 | 8.4675               | Y ●● R     | 1.26 E-6                     | 9.21 E+7  | 5.63 E+7   | 0.7112                 | 27.1448              | R ●       |       |
| PGN1999 | PG1794 | <i>dihydroorotate dehydrogenase family protein</i>        |           |            |                        |                      |            |                              |           |            |                        |                      |           |       |
| PG0052  |        | 3.05 E-1                                                  | 3.4       | 1          | 1.7751                 | 2.1449               | Y ●● R     | 0                            | 1.14 E+6  | 1 E+3      | 10.1491                | 20.1161              | R ●       |       |
| PGN2001 | PG0045 | <i>sensor histidine kinase</i>                            |           |            |                        |                      |            |                              |           |            |                        |                      |           |       |
| PG0054  |        | 4.53 E-1                                                  | 9.4       | 13         | -0.4659                | 4.4862               | Y ●● Y     | 1.26 E-2                     | 2.46 E+6  | 7.54 E+6   | -1.6130                | 23.2541              | Y ●       |       |
| PGN2003 | PG0046 | <i>recJ single-stranded-DNA-specific exonuclease RecJ</i> |           |            |                        |                      |            |                              |           |            |                        |                      |           |       |
| PG0055  |        | 1.06 E-1                                                  | 6.8       | 1.5        | 2.1901                 | 3.0610               | Y ●● R     | 3.44 E-15                    | 1.46 E+6  | 7.78 E+4   | 4.2320                 | 20.5534              | R ●       |       |
| PGN2004 | PG0047 | <i>conserved domain protein</i>                           |           |            |                        |                      |            |                              |           |            |                        |                      |           |       |
| PG0056  |        | 5.89 E-1                                                  | 83.0      | 77.5       | 0.0989                 | 7.3264               | Y ●● Y     | 1.5 E-1                      | 3.04 E+7  | 3.87 E+7   | -0.3479                | 26.0430              | Y ●       |       |
| PGN2005 | PG0048 | <i>hypothetical protein PG_0056</i>                       |           |            |                        |                      |            |                              |           |            |                        |                      |           |       |

| TIGR    |        | PP PPC / Pg Spectral Count                                                               |           |            |                        |                      |            | PP PPC/ Pg Protein Intensity |  |         |           |            |                        | 33277                |           |   |
|---------|--------|------------------------------------------------------------------------------------------|-----------|------------|------------------------|----------------------|------------|------------------------------|--|---------|-----------|------------|------------------------|----------------------|-----------|---|
| PGN     | LANL   | q-value                                                                                  | PP (Norm) | PPC (Norm) | log <sub>2</sub> Ratio | log <sub>2</sub> Sum | Regulation |                              |  | q-value | PP (Norm) | PPC (Norm) | log <sub>2</sub> Ratio | log <sub>2</sub> Sum | Consensus |   |
| PG0057  |        | 7.53 E-2                                                                                 | 18.0      | 7.5        | 1.2605                 | 4.6707               | Y          |                              |  | R       | 4.94 E-6  | 3.6 E+6    | 1.72 E+6               | 1.0612               | 22.3439   | R |
| PGN2006 | PG0049 | <i>pncB</i> nicotinate phosphoribosyltransferase                                         |           |            |                        |                      |            |                              |  |         |           |            |                        |                      |           |   |
| PG0058  |        | 6 E-1                                                                                    | 1.7       | 2.5        | -0.5468                | 2.0743               | Y          |                              |  | Y       | 3.03 E-2  | 2.92 E+5   | 3.83 E+5               | -0.3949              | 19.3648   | Y |
| PGN2007 | PG0050 | <i>nadD</i> nicotinate (nicotinamide) nucleotide adenylyltransferase                     |           |            |                        |                      |            |                              |  |         |           |            |                        |                      |           |   |
| PG0059  |        | 2.15 E-1                                                                                 | 4.3       | 1          | 2.0970                 | 2.4001               | Y          |                              |  | R       | 0         | 2.4 E+6    | 1 E+3                  | 11.2306              | 21.1970   | R |
| PGN2008 | PG0051 | hypothetical protein PG_0059                                                             |           |            |                        |                      |            |                              |  |         |           |            |                        |                      |           |   |
| PG0062  |        | 5.89 E-1                                                                                 | 1.7       | 1          | 0.7751                 | 1.4390               | Y          |                              |  | R       | 0         | 1.77 E+5   | 1 E+3                  | 7.4711               | 17.4450   | R |
| PGN2011 | PG0053 | TPR domain protein                                                                       |           |            |                        |                      |            |                              |  |         |           |            |                        |                      |           |   |
| PG0063  |        | 3.21 E-1                                                                                 | 1.7       | 4.5        | -1.3948                | 2.6349               | Y          |                              |  | Y       | 2.02 E-2  | 1.37 E+6   | 3.77 E+6               | -1.4570              | 22.2950   | Y |
| PGN2012 | PG0054 | outer membrane efflux protein                                                            |           |            |                        |                      |            |                              |  |         |           |            |                        |                      |           |   |
| PG0064  |        | 3.55 E-1                                                                                 | 8.6       | 13.5       | -0.6579                | 4.4631               | Y          |                              |  | Y       | 2.6 E-2   | 2.19 E+6   | 3.66 E+6               | -0.7364              | 22.4803   | Y |
| PGN2013 | PG0055 | heavy metal efflux pump CzcA family                                                      |           |            |                        |                      |            |                              |  |         |           |            |                        |                      |           |   |
| PG0065  |        | 5.89 E-1                                                                                 | 1.7       | 1          | 0.7751                 | 1.4390               | Y          |                              |  | R       | 0         | 2.52 E+5   | 1 E+3                  | 7.9797               | 17.9511   | R |
| PGN2014 | PG0056 | efflux transporter RND family MFP subunit                                                |           |            |                        |                      |            |                              |  |         |           |            |                        |                      |           |   |
| PG0069  |        | 6.28 E-3                                                                                 | 11.1      | 31         | -1.4787                | 5.3966               | G          |                              |  | G       | 1.49 E-6  | 2.8 E+6    | 6.57 E+6               | -1.2277              | 23.1600   | G |
| PGN2017 | PG0058 | conserved hypothetical protein                                                           |           |            |                        |                      |            |                              |  |         |           |            |                        |                      |           |   |
| PG0070  |        | 8.78 E-3                                                                                 | 82.1      | 48         | 0.7751                 | 7.0240               | R          |                              |  | Y       | 1.6 E-1   | 4.76 E+7   | 4.45 E+7               | 0.0974               | 26.4556   | R |
| PGN2018 | PG0059 | <i>lpxA</i> acyl-(acyl-carrier-protein)-UDP-N-acetylglucosamine acyltransferase          |           |            |                        |                      |            |                              |  |         |           |            |                        |                      |           |   |
| PG0071  |        | 3.37 E-1                                                                                 | 123.2     | 106.5      | 0.2103                 | 7.8437               | Y          |                              |  | Y       | 1.38 E-1  | 8.89 E+7   | 8.37 E+7               | 0.0873               | 27.3629   | Y |
| PGN2019 | PG0060 | UDP-3-O-acyl-GlcNAc deacetylase/beta-hydroxyacyl-[acyl carrier protein] dehydratase FabZ |           |            |                        |                      |            |                              |  |         |           |            |                        |                      |           |   |
| PG0072  |        | 1.21 E-3                                                                                 | 40.2      | 14         | 1.5223                 | 5.7606               | R          |                              |  | R       | 3.24 E-7  | 1.75 E+7   | 5.53 E+6               | 1.6592               | 24.4552   | R |
| PGN2020 | PG0061 | <i>lpxD</i> UDP-3-O-[3-hydroxymyristoyl] glucosamine N-acyltransferase                   |           |            |                        |                      |            |                              |  |         |           |            |                        |                      |           |   |
| PG0073  |        | 3.2 E-6                                                                                  | 24.8      | 74         | -1.5764                | 6.6266               | G          |                              |  | G       | 1.08 E-8  | 1.63 E+7   | 5.34 E+7               | -1.7128              | 26.0547   | G |
| PGN2021 | PG0062 | orotidine 5'-monophosphate decarboxylase                                                 |           |            |                        |                      |            |                              |  |         |           |            |                        |                      |           |   |
| PG0074  |        | 6.05 E-2                                                                                 | 6.8       | 1          | 2.7751                 | 2.9718               | Y          |                              |  | R       | 2.58 E-16 | 4.07 E+6   | 1 E+3                  | 11.9904              | 21.9566   | R |
| PGN2022 | PG0063 | <i>prfA</i> peptide chain release factor 1                                               |           |            |                        |                      |            |                              |  |         |           |            |                        |                      |           |   |
| PG0075  |        | 2.04 E-4                                                                                 | 31.7      | 7          | 2.1772                 | 5.2727               | R          |                              |  | R       | 0         | 8.78 E+6   | 2.08 E+6               | 2.0772               | 23.3731   | R |
| PGN2023 | PG0064 | phosphoribosylformylglycinamide cyclo-ligase putative                                    |           |            |                        |                      |            |                              |  |         |           |            |                        |                      |           |   |
| PG0076  |        | 5.8 E-1                                                                                  | 7.7       | 6          | 0.3601                 | 3.7762               | Y          |                              |  | Y       | 1.17 E-2  | 4.61 E+6   | 2.97 E+6               | 0.6343               | 22.8552   | Y |
| PGN2024 | PG0065 | N-acetylmuramoyl-L-alanine amidase family 4                                              |           |            |                        |                      |            |                              |  |         |           |            |                        |                      |           |   |
| PG0078  |        | 6 E-1                                                                                    | 1.7       | 2.5        | -0.5468                | 2.0743               | Y          |                              |  | G       | 9.28 E-6  | 1.85 E+3   | 4.9 E+5                | -8.0485              | 18.9077   | G |
| PGN2025 | PG0066 | conserved hypothetical protein                                                           |           |            |                        |                      |            |                              |  |         |           |            |                        |                      |           |   |
| PG0079  |        | 1.16 E-1                                                                                 | 29.1      | 16.5       | 0.8182                 | 5.5107               | Y          |                              |  | R       | 1.34 E-6  | 2.24 E+7   | 2.86 E+6               | 2.9678               | 24.5875   | R |
| PGN2026 | PG0067 | abortive infection protein putative                                                      |           |            |                        |                      |            |                              |  |         |           |            |                        |                      |           |   |

| TIGR    |        | PP PPC / Pg Spectral Count                                              |           |            |                        |                      |            | PP PPC/ Pg Protein Intensity |  |         |           |            |                        | 33277                |           |   |
|---------|--------|-------------------------------------------------------------------------|-----------|------------|------------------------|----------------------|------------|------------------------------|--|---------|-----------|------------|------------------------|----------------------|-----------|---|
| PGN     | LANL   | q-value                                                                 | PP (Norm) | PPC (Norm) | log <sub>2</sub> Ratio | log <sub>2</sub> Sum | Regulation |                              |  | q-value | PP (Norm) | PPC (Norm) | log <sub>2</sub> Ratio | log <sub>2</sub> Sum | Consensus |   |
| PG0081  |        | 3.21 E-1                                                                | 1.7       | 4.5        | -1.3948                | 2.6349               | Y          |                              |  | Y       | 4.63 E-2  | 1.85 E+3   | 2.67 E+6               | -10.4953             | 21.3501   | Y |
| PGN2028 | PG0069 | <i>hypothetical protein PG_0081</i>                                     |           |            |                        |                      |            |                              |  |         |           |            |                        |                      |           |   |
| PG0082  |        | 2.84 E-2                                                                | 1.7       | 10         | -2.5468                | 3.5498               | Y          |                              |  | G       | 8.43 E-6  | 1.85 E+3   | 2.31 E+6               | -10.2863             | 21.1412   | G |
| PGN2029 | PG0070 | <i>hypothetical protein PG_0082</i>                                     |           |            |                        |                      |            |                              |  |         |           |            |                        |                      |           |   |
| PG0083  |        | 1.84 E-1                                                                | 1.7       | 6          | -1.8099                | 2.9470               | Y          |                              |  | G       | 1.22 E-5  | 1.85 E+3   | 2.21 E+6               | -10.2189             | 21.0739   | G |
| PGN2030 | PG0071 | <i>hypothetical protein PG_0083</i>                                     |           |            |                        |                      |            |                              |  |         |           |            |                        |                      |           |   |
| PG0084  |        | 4.03 E-1                                                                | 5.1       | 8.5        | -0.7274                | 3.7691               | Y          |                              |  | Y       | 6.1 E-3   | 1.23 E+6   | 2.86 E+6               | -1.2224              | 21.9616   | Y |
| PGN2031 | PG0072 | <i>sda L-serine dehydratase iron-sulfur-dependent single chain form</i> |           |            |                        |                      |            |                              |  |         |           |            |                        |                      |           |   |
| PG0086  |        | 1.24 E-1                                                                | 24.8      | 13.5       | 0.8782                 | 5.2598               | Y          |                              |  | Y       | 2.79 E-2  | 1.01 E+7   | 6.53 E+6               | 0.6313               | 23.9894   | Y |
| PGN2033 | PG0074 | <i>ATP-dependent RNA helicase DEAD/DEAH box family</i>                  |           |            |                        |                      |            |                              |  |         |           |            |                        |                      |           |   |
| PG0087  |        | 5.43 E-1                                                                | 4.3       | 6          | -0.4879                | 3.3615               | Y          |                              |  | Y       | 1.84 E-1  | 2.92 E+6   | 3.05 E+6               | -0.0637              | 22.5082   | Y |
| PGN2034 | PG0076 | <i>SIS domain protein</i>                                               |           |            |                        |                      |            |                              |  |         |           |            |                        |                      |           |   |
| PG0090  |        | 2.77 E-9                                                                | 543.3     | 354        | 0.6181                 | 9.8095               | R          |                              |  | Y       | 4.61 E-2  | 6.15 E+8   | 5.27 E+8               | 0.2236               | 30.0893   | R |
| PGN2037 | PG0079 | <i>Dps family protein</i>                                               |           |            |                        |                      |            |                              |  |         |           |            |                        |                      |           |   |
| PG0091  |        | 6.69 E-1                                                                | 1.7       | 2          | -0.2249                | 1.8919               | Y          |                              |  | Y       | 1.37 E-3  | 1.85 E+3   | 4.37 E+5               | -7.8821              | 18.7419   | Y |
| PGN2038 | PG0080 | <i>transporter putative</i>                                             |           |            |                        |                      |            |                              |  |         |           |            |                        |                      |           |   |
| PG0092  |        | 3.05 E-1                                                                | 3.4       | 1          | 1.7751                 | 2.1449               | Y          |                              |  | R       | 9.6 E-14  | 9.06 E+5   | 1 E+3                  | 9.8241               | 19.7915   | R |
| PGN2039 | PG0081 | <i>transporter putative</i>                                             |           |            |                        |                      |            |                              |  |         |           |            |                        |                      |           |   |
| PG0093  |        | 5.94 E-2                                                                | 11.1      | 3          | 1.8906                 | 3.8200               | Y          |                              |  | Y       | 2.98 E-3  | 4.75 E+6   | 1.62 E+6               | 1.5514               | 22.6038   | Y |
| PGN2040 | PG0082 | <i>HlyD family secretion protein</i>                                    |           |            |                        |                      |            |                              |  |         |           |            |                        |                      |           |   |
| PG0094  |        | 2.09 E-3                                                                | 23.1      | 53         | -1.1979                | 6.2499               | G          |                              |  | G       | 2.79 E-4  | 9.59 E+6   | 3.26 E+7               | -1.7666              | 25.3318   | G |
| PGN2041 | PG0083 | <i>outer membrane efflux protein putative</i>                           |           |            |                        |                      |            |                              |  |         |           |            |                        |                      |           |   |
| PG0095  |        | 4.23 E-1                                                                | 11.1      | 7.5        | 0.5686                 | 4.2191               | Y          |                              |  | Y       | 2.1 E-2   | 3.47 E+6   | 2.26 E+6               | 0.6164               | 22.4492   | Y |
| PGN2042 | PG0084 | <i>mutS DNA mismatch repair protein MutS</i>                            |           |            |                        |                      |            |                              |  |         |           |            |                        |                      |           |   |
| PG0097  |        | 1.9 E-12                                                                | 95.0      | 19         | 2.3216                 | 6.8326               | R          |                              |  | R       | 0         | 1.93 E+7   | 1.9 E+6                | 3.3446               | 24.3371   | R |
| PGN2043 | PG0085 | <i>conserved hypothetical protein TIGR01033</i>                         |           |            |                        |                      |            |                              |  |         |           |            |                        |                      |           |   |
| PG0099  |        | 7.94 E-4                                                                | 78.7      | 38.5       | 1.0319                 | 6.8731               | R          |                              |  | R       | 1.56 E-14 | 4.42 E+7   | 1.92 E+7               | 1.2013               | 25.9196   | R |
| PGN2045 | PG0086 | <i>pheT phenylalanyl-tRNA synthetase beta subunit</i>                   |           |            |                        |                      |            |                              |  |         |           |            |                        |                      |           |   |
| PG2072  |        | 2.15 E-1                                                                | 4.3       | 1          | 2.0970                 | 2.4001               | Y          |                              |  | R       | 5.72 E-6  | 1.88 E+6   | 1 E+3                  | 10.8767              | 20.8432   | R |
| PGN2050 | PG1811 | <i>UvrD/REP helicase domain protein</i>                                 |           |            |                        |                      |            |                              |  |         |           |            |                        |                      |           |   |
| PG2070  |        | 3.64 E-1                                                                | 5.1       | 9          | -0.8099                | 3.8211               | Y          |                              |  | Y       | 3.45 E-2  | 1.05 E+6   | 2.02 E+6               | -0.9389              | 21.5508   | Y |
| PGN2052 | PG1809 | <i>hypothetical protein PG_2070</i>                                     |           |            |                        |                      |            |                              |  |         |           |            |                        |                      |           |   |
| PG2069  |        | 2.52 E-1                                                                | 19.7      | 12         | 0.7137                 | 4.9855               | Y          |                              |  | R       | 9.57 E-4  | 9.71 E+6   | 4.67 E+6               | 1.0576               | 23.7775   | R |
| PGN2053 | PG1808 | <i>oxidoreductase short chain dehydrogenase/reductase family</i>        |           |            |                        |                      |            |                              |  |         |           |            |                        |                      |           |   |

| TIGR    |        | PP PPC / Pg Spectral Count                                |           |            |                        |                      |            | PP PPC/ Pg Protein Intensity |           |            |                        |                      |           | 33277 |
|---------|--------|-----------------------------------------------------------|-----------|------------|------------------------|----------------------|------------|------------------------------|-----------|------------|------------------------|----------------------|-----------|-------|
| PGN     | LANL   | q-value                                                   | PP (Norm) | PPC (Norm) | log <sub>2</sub> Ratio | log <sub>2</sub> Sum | Regulation | q-value                      | PP (Norm) | PPC (Norm) | log <sub>2</sub> Ratio | log <sub>2</sub> Sum | Consensus |       |
| PG2068  |        | 1.61 E-1                                                  | 46.2      | 31.5       | 0.5527                 | 6.2799               | Y ●● Y     | 1.36 E-1                     | 2.92 E+7  | 3.29 E+7   | -0.1717                | 25.8884              | Y ●       |       |
| PGN2054 | PG1807 | <i>tagD glycerol-3-phosphate cytidylyltransferase</i>     |           |            |                        |                      |            |                              |           |            |                        |                      |           |       |
| PG2067  |        | 4.23 E-1                                                  | 20.5      | 26.5       | -0.3679                | 5.5557               | Y ●● Y     | 2.07 E-2                     | 7.97 E+6  | 1.19 E+7   | -0.5766                | 24.2429              | Y ●       |       |
| PGN2055 | PG1806 | <i>pdxA pyridoxal phosphate biosynthetic protein PdxA</i> |           |            |                        |                      |            |                              |           |            |                        |                      |           |       |
| PG2066  |        | 2.09 E-1                                                  | 41.1      | 28.5       | 0.5272                 | 6.1204               | Y ●● Y     | 1.42 E-3                     | 1.95 E+7  | 1.25 E+7   | 0.6433                 | 24.9290              | Y ●       |       |
| PGN2056 | PG1805 | <i>lipoprotein putative</i>                               |           |            |                        |                      |            |                              |           |            |                        |                      |           |       |
| PG2065  |        | 6.69 E-1                                                  | 2.6       | 3          | -0.2249                | 2.4769               | Y ●● G     | 0                            | 4.9 E+5   | 9.16 E+5   | -0.9037                | 20.4230              | G ●       |       |
| PGN2057 | PG1804 | <i>conserved hypothetical protein TIGR00048</i>           |           |            |                        |                      |            |                              |           |            |                        |                      |           |       |
| PG2062  |        | 2 E-2                                                     | 39.4      | 19         | 1.0507                 | 5.8669               | Y ●● R     | 2.01 E-7                     | 2.07 E+7  | 10 E+6     | 1.0484                 | 24.8705              | R ●       |       |
| PGN2060 | PG1801 | <i>hisS histidyl-tRNA synthetase</i>                      |           |            |                        |                      |            |                              |           |            |                        |                      |           |       |
| PG2061  |        | 5.43 E-1                                                  | 3.4       | 5          | -0.5468                | 3.0743               | Y ●● R     | 5.28 E-4                     | 1.25 E+6  | 7.29 E+5   | 0.7782                 | 20.9166              | Y ●       |       |
| PGN2061 | PG1800 | <i>folA dihydrofolate reductase</i>                       |           |            |                        |                      |            |                              |           |            |                        |                      |           |       |
| PG2060  |        | 7.06 E-1                                                  | 18.0      | 18         | -0.0025                | 5.1687               | Y ●● Y     | 1.07 E-2                     | 9.94 E+6  | 6.34 E+6   | 0.6493                 | 23.9569              | Y ●       |       |
| PGN2062 | PG1799 | <i>thyA thymidylate synthase</i>                          |           |            |                        |                      |            |                              |           |            |                        |                      |           |       |
| PG2197  |        | 5.74 E-1                                                  | 4.3       | 3          | 0.5121                 | 2.8636               | Y ●● R     | 1.77 E-4                     | 1.44 E+6  | 1.47 E+5   | 3.2877                 | 20.5953              | R ●       |       |
| PGN2064 | PG1921 | <i>conserved hypothetical protein</i>                     |           |            |                        |                      |            |                              |           |            |                        |                      |           |       |
| PG2024  |        | 4.23 E-1                                                  | 3.4       | 6          | -0.8099                | 3.2361               | Y ●● Y     | 6.09 E-3                     | 1.45 E+7  | 1.79 E+6   | 3.0116                 | 23.9537              | Y ●       |       |
| PGN2065 | PG1768 | <i>hagE hemagglutinin protein HagE</i>                    |           |            |                        |                      |            |                              |           |            |                        |                      |           |       |
| PG2199  |        | 4.02 E-1                                                  | 4.3       | 2          | 1.0970                 | 2.6504               | Y ●● R     | 0                            | 1.44 E+6  | 3.97 E+5   | 1.8628                 | 20.8118              | R ●       |       |
| PGN2066 | PG1923 | <i>ABC transporter ATP-binding protein putative</i>       |           |            |                        |                      |            |                              |           |            |                        |                      |           |       |
| PG2200  |        | 3.06 E-1                                                  | 4.3       | 1.5        | 1.5121                 | 2.5306               | Y ●● R     | 0                            | 1.33 E+6  | 1.86 E+5   | 2.8385                 | 20.5338              | R ●       |       |
| PGN2067 | PG1924 | <i>TPR domain protein</i>                                 |           |            |                        |                      |            |                              |           |            |                        |                      |           |       |
| PG2201  |        | 6.49 E-1                                                  | 15.4      | 17         | -0.1424                | 5.0180               | Y ●● Y     | 1.74 E-1                     | 4.65 E+6  | 4.88 E+6   | -0.0699                | 23.1830              | Y ●       |       |
| PGN2068 | PG1925 | <i>def polypeptide deformylase</i>                        |           |            |                        |                      |            |                              |           |            |                        |                      |           |       |
| PG2204  |        | 1.55 E-3                                                  | 63.3      | 110        | -0.7968                | 7.4373               | G ●● Y     | 7.49 E-3                     | 3.52 E+7  | 4.58 E+7   | -0.3799                | 26.2723              | G ●       |       |
| PGN2070 | PG1927 | <i>hypothetical protein PG_2204</i>                       |           |            |                        |                      |            |                              |           |            |                        |                      |           |       |
| PG2205  |        | 3.76 E-1                                                  | 16.3      | 22.5       | -0.4688                | 5.2764               | Y ●● Y     | 3.53 E-2                     | 7.93 E+6  | 1.03 E+7   | -0.3817                | 24.1220              | Y ●       |       |
| PGN2071 | PG1928 | <i>panE 2-dehydropantoate 2-reductase</i>                 |           |            |                        |                      |            |                              |           |            |                        |                      |           |       |
| PG2206  |        | 2.52 E-4                                                  | 29.1      | 6          | 2.2776                 | 5.1331               | R ●● R     | 0                            | 1.39 E+7  | 2.66 E+6   | 2.3868                 | 23.9838              | R ●       |       |
| PGN2072 | PG1929 | <i>ABC transporter ATP-binding protein</i>                |           |            |                        |                      |            |                              |           |            |                        |                      |           |       |
| PG2207  |        | 2.62 E-2                                                  | 71.0      | 43.5       | 0.7072                 | 6.8394               | Y ●● Y     | 1.67 E-3                     | 5.2 E+7   | 3.01 E+7   | 0.7881                 | 26.2909              | Y ●       |       |
| PGN2073 | PG1931 | <i>conserved domain protein</i>                           |           |            |                        |                      |            |                              |           |            |                        |                      |           |       |
| PG2210  |        | 4.75 E-1                                                  | 14.5      | 11         | 0.4031                 | 4.6750               | Y ●● R     | 6.76 E-5                     | 4.1 E+6   | 1.82 E+6   | 1.1718                 | 22.4971              | R ●       |       |
| PGN2075 | PG1934 | <i>uvrA-2 excinuclease ABC A subunit</i>                  |           |            |                        |                      |            |                              |           |            |                        |                      |           |       |

| TIGR    |        | PP PPC / Pg Spectral Count                          |           |            |                        |                      |            | PP PPC/ Pg Protein Intensity |   |         |           |            |                        | 33277                |           |     |
|---------|--------|-----------------------------------------------------|-----------|------------|------------------------|----------------------|------------|------------------------------|---|---------|-----------|------------|------------------------|----------------------|-----------|-----|
| PGN     | LANL   | q-value                                             | PP (Norm) | PPC (Norm) | log <sub>2</sub> Ratio | log <sub>2</sub> Sum | Regulation |                              |   | q-value | PP (Norm) | PPC (Norm) | log <sub>2</sub> Ratio | log <sub>2</sub> Sum | Consensus |     |
| PG2215  |        | 7.2 E-3                                             | 43.6      | 19.5       | 1.1621                 | 5.9804               | R          | ●                            | ● | R       | 3.64 E-4  | 4.38 E+7   | 2.29 E+7               | 0.9377               | 25.9920   | R ● |
| PGN2079 | PG1936 | <i>manC</i> mannose-1-phosphate guanylyltransferase |           |            |                        |                      |            |                              |   |         |           |            |                        |                      |           |     |
| PG2216  |        | 5.77 E-2                                            | 26.5      | 45.5       | -0.7785                | 6.1704               | Y          | ●                            | ● | Y       | 1.11 E-3  | 1.47 E+7   | 2.14 E+7               | -0.5369              | 25.1055   | Y ● |
| PGN2080 | PG1938 | <i>hypothetical protein PG_2216</i>                 |           |            |                        |                      |            |                              |   |         |           |            |                        |                      |           |     |
| PG2217  |        | 4.23 E-1                                            | 17.1      | 12.5       | 0.4532                 | 4.8882               | Y          | ●                            | ● | Y       | 1.13 E-1  | 7.09 E+6   | 5.96 E+6               | 0.2511               | 23.6374   | Y ● |
| PGN2081 | PG1939 | <i>dxs</i> deoxyxylulose-5-phosphate synthase       |           |            |                        |                      |            |                              |   |         |           |            |                        |                      |           |     |
| PG2218  |        | 4.75 E-1                                            | 3.4       | 5.5        | -0.6843                | 3.1575               | Y          | ●                            | ● | Y       | 2.23 E-2  | 1.98 E+6   | 1.38 E+6               | 0.5149               | 21.6807   | Y ● |
| PGN2082 | PG1940 | <i>trkA</i> potassium uptake protein TrkA           |           |            |                        |                      |            |                              |   |         |           |            |                        |                      |           |     |
| PG2221  |        | 6.46 E-4                                            | 1.7       | 17         | -3.3124                | 4.2258               | G          | ●                            | ● | G       | 8.33 E-7  | 1.85 E+3   | 3.01 E+6               | -10.6698             | 21.5244   | G ● |
| PGN2085 | PG1942 | <i>MiaB</i> -like tRNA modifying enzyme             |           |            |                        |                      |            |                              |   |         |           |            |                        |                      |           |     |
| PG2222  |        | 6.97 E-1                                            | 3.4       | 3.5        | -0.0323                | 2.7913               | Y          | ●                            | ● | R       | 1.05 E-5  | 2.63 E+6   | 6.66 E+5               | 1.9787               | 21.6506   | Y ● |
| PGN2086 | PG1943 | <i>acyltransferase HtrB/MsbB</i> family             |           |            |                        |                      |            |                              |   |         |           |            |                        |                      |           |     |
| PG2223  |        | 6.69 E-1                                            | 1.7       | 2          | -0.2249                | 1.8919               | Y          | ●                            | ● | G       | 0         | 1.85 E+3   | 9.43 E+4               | -5.6705              | 16.5523   | G ● |
| PGN2087 | PG1944 | <i>glycosyl transferase group 2</i> family protein  |           |            |                        |                      |            |                              |   |         |           |            |                        |                      |           |     |
| PG2227  |        | 6.77 E-1                                            | 4.3       | 4          | 0.0970                 | 3.0493               | Y          | ●                            | ● | Y       | 1.29 E-1  | 2.33 E+6   | 2.7 E+6                | -0.2109              | 22.2629   | Y ● |
| PGN2091 |        | <i>hypothetical protein PG_2227</i>                 |           |            |                        |                      |            |                              |   |         |           |            |                        |                      |           |     |
